# Supplementary material for: Asymmetric allylic substitution–isomerization to axially chiral enamides via hydrogen-bonding assisted central-to-axial chirality transfer
Source: PubMed Central journal article supplement — Chem Sci. 2020 Sep 7;11(37):10119–26. doi: 10.1039/d0sc02828b (PMC8162293; doi:10.1039/d0sc02828b), 2020-09-07
Supplement: SC-011-D0SC02828B-s001.pdf [file SC-011-D0SC02828B-s001.pdf]

# Asymmetric Allylic Substitution-Isomerization to Axially Chiral Enamides via Hydrogen-Bonding Assisted Central-to-Axial Chirality Transfer

Chao Sun,<sup>†,§</sup> Xiaotian Qi,<sup>‡,§</sup> Xiao-Long Min,<sup>†</sup> Xue-Dan Bai,<sup>†</sup> Peng Liu<sup>\*,‡,||</sup> and Ying He<sup>\*,†</sup>

<sup>†</sup> School of Chemical Engineering, Nanjing University of Science & Technology, Nanjing 210094, China

<sup>‡</sup> Department of Chemistry, University of Pittsburgh, Pittsburgh, Pennsylvania 15260, United States

<sup>||</sup> Department of Chemical and Petroleum Engineering, University of Pittsburgh, Pittsburgh, Pennsylvania 15261, United States

<sup>§</sup> These authors contributed equally.

\*Correspondence to: [yhe@njust.edu.cn](mailto:yhe@njust.edu.cn), [pengliu@pitt.edu](mailto:pengliu@pitt.edu)

|                                                                                  |      |
|----------------------------------------------------------------------------------|------|
| General Information .....                                                        | S2   |
| General procedure <b>A</b> : The synthesis of quinolinol analogue .....          | S2   |
| General procedure <b>B</b> : Optimized conditions .....                          | S3   |
| General procedure <b>C</b> : Synthesis of axially chiral enamides .....          | S4   |
| General procedure <b>D</b> : Large scale experiment.....                         | S26  |
| General procedure <b>E</b> : Iridium catalyzed asymmetric allylic amination..... | S27  |
| General procedure of isomerization of <b>4a</b> .....                            | S31  |
| Deuterium-labeling experiment.....                                               | S31  |
| General procedure <b>F</b> : Chiral transfer for epoxidation.....                | S32  |
| Enantiomerization barrier determination for <b>3a</b> .....                      | S34  |
| DFT results .....                                                                | S35  |
| References .....                                                                 | S83  |
| X-ray structures of <b>3f</b> .....                                              | S85  |
| X-ray structures of <b>8c</b> .....                                              | S89  |
| Spectral Data .....                                                              | S93  |
| HPLC data .....                                                                  | S144 |

## General Information

Unless otherwise noted, all starting materials were purchased from commercial sources and used without any further purification. The reactions were carried out in the glovebox unless otherwise stated. Toluene, 1, 4-dioxane, DCM, and DME were obtained from commercial sources and anhydrous THF is gained from distilling apparatus. Chemicals were used as obtained from the suppliers. The analytical data for the known compounds were found to match with the literature data and stored at -30 °C under an inert atmosphere. Room temperature = 23-25 °C. TLC plates were visualized under UV light (254 nm) or by staining with phosphomolybdic acid or KMnO<sub>4</sub> followed by heating. Abbreviations are reported as follows: EA = ethyl acetate, DCM = dichloromethane, DME = dimethoxyethane, THF = tetrahydrofuran, PE = petroleum ether. <sup>1</sup>H NMR, <sup>19</sup>F NMR and <sup>13</sup>C NMR spectra were recorded on Bruker-AVANCE 500 or Bruker-DMX 400 spectrometer, and chemical shifts are reported in ppm. Multiplicities are reported using the following abbreviations: s = singlet, d = doublet, t = triplet, q = quartet, m = multiplet. The impurities of grease were found in some cases of NMR, however, not affect the yields of the products. High resolution mass spectral data were acquired on Agilent Technologies Accurate-Mass Q-TQF LC/MS 6520 operated by China Pharmaceutical University. Enantiomeric excess was determined on a Thermo Fisher UltiMate 3000 Chiral HPLC using AD, OD and IA column. All cinnamyl carbonates, quinolones and 2-pyridiones are known compounds except **2x**.

### General procedure A: The synthesis of quinolinol analogue

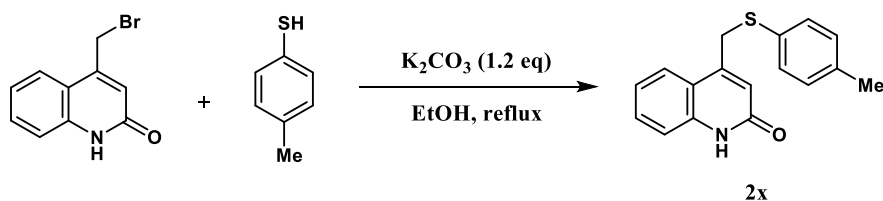

A solution of 4-(bromomethyl)quinolin-2(1H)-one (2.36 g, 10.0 mmol), *p*-toluenethiol (1.24 g, 10.0 mmol) and anhydrous potassium carbonate (1.65 g, 12.0 mmol) in 30.0 mL of EtOH was heated at reflux for overnight. When the reaction completed, the resulting solution was diluted with water (20 ml) and filtered, and the yellow solid

was collected in 91% yield (3.6 g), m.p.158-159 °C.

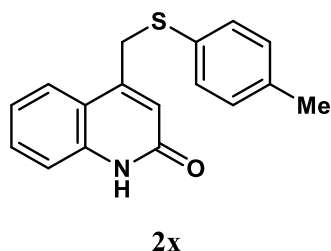

$^1\text{H}$  NMR (500 MHz,  $\text{DMSO-}d_6$ )  $\delta$  11.63 (s, 1H), 7.83 (d,  $J = 8.0$  Hz, 1H), 7.46 (t,  $J = 7.7$  Hz, 1H), 7.26 (d,  $J = 8.2$  Hz, 1H), 7.21 (d,  $J = 7.8$  Hz, 2H), 7.16 (t,  $J = 7.6$  Hz, 1H), 7.08 (d,  $J = 7.8$  Hz, 2H), 6.25 (s, 1H), 4.35 (s, 2H), 2.21 (s, 3H).  $^{13}\text{C}$  NMR (126 MHz,  $\text{DMSO-}d_6$ )  $\delta$  160.63, 145.99, 138.50, 135.75, 130.42, 129.79, 129.66, 129.15, 124.44, 121.00, 120.59, 117.21, 115.08, 33.74, 20.01. HRMS(ESI)  $m/z$ : calculated for  $[\text{C}_{17}\text{H}_{15}\text{NOS} + \text{H}]^+$  282.0953, found 282.0948. IR  $\nu$  2845.62, 1902.48, 1667.44, 1551.40, 1393.72, 1262.81, 1155.70, 977.19, 864.13, 816.53, 670.74, 581.49,  $\text{cm}^{-1}$ .

### General procedure B: Optimized conditions

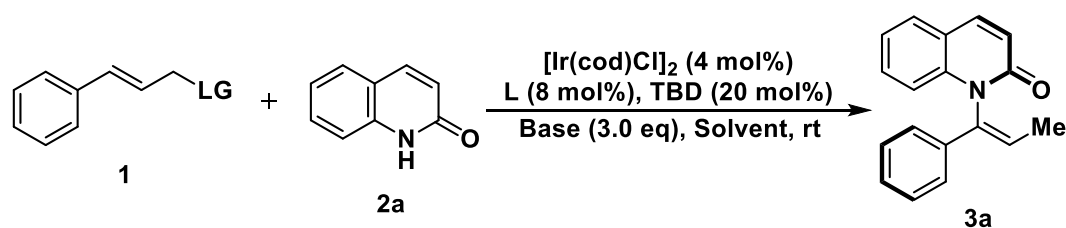

The reactions were proceeded in the glovebox.  $[\text{Ir}(\text{cod})\text{Cl}]_2$  (2.7 mg, 0.004 mmol, 0.04 eq), **L1** (0.008 mmol, 0.08 eq), and TBD (2.8 mg, 0.02 mmol, 0.2 eq) were added to a 2 dram scintillation vial (vial A) equipped with a magnetic stirring bar. The vial was then charged with solvent (0.5 mL) and stirred at 25 °C for 30 min, generating an orange solution. To another 2 dram scintillation vial (vial B) was added **1** (0.1 mmol, 1.0 eq), 2-hydroxyquinoline (0.2 mmol, 2.0 eq), base (0.3 mmol, 3.0 eq) and solvent (0.5 mL). The pre-formed catalyst solution (vial A) was then transferred to vial B. The vial B was sealed and stirred at rt with stirring for 48 h. The vial was then removed from the glovebox and uncapped. Saturated  $\text{NH}_4\text{Cl}$  aqueous solution was added and the mixture was extracted with DCM (10 mL x 3), the combined organic phase was washed with brine, dried over  $\text{Na}_2\text{SO}_4$ , filtered and concentrated in vacuo.

The residue was purified by column chromatography over silica gel (PE : EA = 4 : 1) to afford the desired product.

### General procedure C: Synthesis of axially chiral enamides

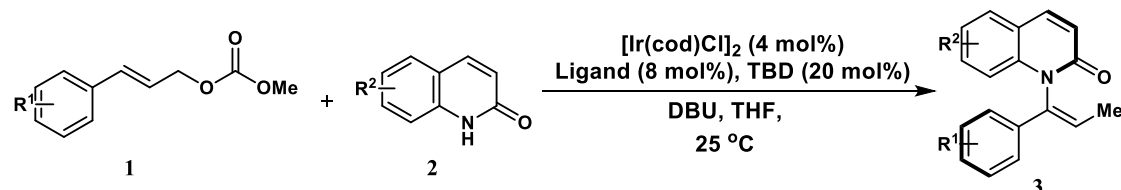

The reactions were proceeded in the glovebox.  $[\text{Ir}(\text{cod})\text{Cl}]_2$  (2.7 mg, 0.004 mmol, 0.04 eq), **L1** (4.3 mg, 0.008 mmol, 0.08 eq), and TBD (2.8 mg, 0.02 mmol, 0.2 eq) were added to a 2 dram scintillation vial (vial A) equipped with a magnetic stirring bar. The vial was then charged with THF (0.5 mL) and stirred at 25 °C (Internal temperature of glove box) for 30 min, generating an orange solution. To another 2 dram scintillation vial (vial B) was added propenyl carbonate (0.1 mmol, 1.0 eq), 2-hydroxyquinoline (0.2 mmol, 2.0 eq), DBU (0.3 mmol, 3.0 eq) and THF (0.5 mL). The pre-formed catalyst solution (vial A) was then transferred to vial B. The vial B was sealed and stirred at rt (Internal temperature of glove box) with stirring for 36-48 h. The vial was then removed from the glovebox and uncapped. Saturated  $\text{NH}_4\text{Cl}$  aqueous solution was added and the mixture was extracted with DCM (10 mL x 3), the combined organic phase was washed with brine, dried over  $\text{Na}_2\text{SO}_4$ , filtered and concentrated in vacuo. The residue was purified by column chromatography over silica gel (PE : EA = 4 : 1) to afford the desired product. Ps: For series of products **3**, the minor signals in the aromatic part are corresponding to *E*-isomer, as well as in aliphatic part of the methyl signal.

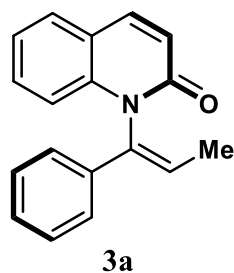

Following the general procedure C, **3a** was obtained as yellow solid (23 mg, 88% yield), m.p.142-143 °C.  $^1\text{H}$  NMR (500 MHz, Chloroform-*d*)  $\delta$  7.82 (d,  $J$  = 9.5 Hz, 1H),

7.61 (dd,  $J = 7.7, 1.5$  Hz, 1H), 7.41 – 7.37 (m, 1H), 7.31 – 7.26 (m, 4H), 7.24 – 7.18 (m, 3H), 6.82 (d,  $J = 9.6$  Hz, 1H), 6.73 (q,  $J = 7.0$  Hz, 1H), 1.60 (d,  $J = 6.9$  Hz, 3H).  $^{13}\text{C}$  NMR (126 MHz, Chloroform-*d*)  $\delta$  160.20, 139.00, 138.28, 134.76, 134.44, 129.80, 127.78, 127.49, 127.08, 124.44, 123.87, 121.51, 121.22, 119.46, 114.63, 12.41. HRMS(ESI)  $m/z$ : calculated for  $[\text{C}_{18}\text{H}_{15}\text{NO} + \text{H}]^+$  262.1232, found 262.1226. IR  $\nu$  1640.66, 1584.13, 1554.38, 1488.93, 1447.27, 1322.31, 1215.21, 1128.93, 962.31, 825.45, 762.98, 694.55,  $\text{cm}^{-1}$ . HPLC data (Chiralpak AD column, hexane : isopropanol = 85 : 15, 1.0 mL/min),  $t_r = 23.2$  min (major),  $t_r = 13.4$  min (minor), ee = 92%.

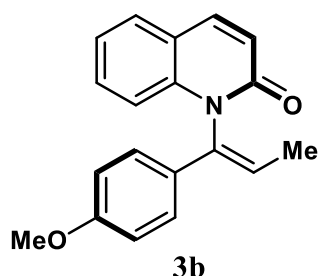

Following the general procedure **C**, **3b** was obtained as white solid (23 mg, 80% yield), m.p. 101–102 °C.  $^1\text{H}$  NMR (500 MHz, Chloroform-*d*)  $\delta$  7.81 (d,  $J = 9.5$  Hz, 1H), 7.60 (dd,  $J = 8.0, 1.5$  Hz, 1H), 7.39 (ddd,  $J = 8.7, 7.1, 1.5$  Hz, 1H), 7.23 – 7.18 (m, 4H), 6.82 – 6.78 (m, 3H), 6.58 (q,  $J = 7.0$  Hz, 1H), 3.75 (s, 3H), 1.56 (d,  $J = 7.0$  Hz, 3H).  $^{13}\text{C}$  NMR (126 MHz, Chloroform-*d*)  $\delta$  160.18, 158.52, 138.92, 138.27, 134.36, 129.76, 127.43, 127.13, 125.20, 122.22, 121.46, 121.23, 119.45, 114.69, 113.17, 54.25, 12.24. HRMS(ESI)  $m/z$ : calculated for  $[\text{C}_{19}\text{H}_{17}\text{NO}_2 + \text{H}]^+$  292.1338, found 292.1339. IR  $\nu$  1643.64, 1587.11, 1509.75, 1438.35, 1322.31, 1244.96, 1182.48, 1134.88, 1030.74, 831.40, 751.07, 590.41,  $\text{cm}^{-1}$ . HPLC data (Chiralpak AD column, hexane : isopropanol = 85 : 15, 1.0 mL/min),  $t_r = 28.3$  min (major),  $t_r = 18.9$  min (minor), ee = 94%.

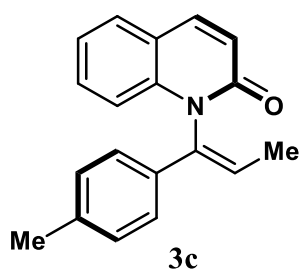

Following the general procedure **C**, **3c** was obtained as white solid (25 mg, 90% yield), m.p.146-147 °C. <sup>1</sup>H NMR (500 MHz, Chloroform-*d*) δ 7.81 (d, *J* = 9.5 Hz, 1H), 7.60 (dd, *J* = 8.1, 1.5 Hz, 1H), 7.38 (td, *J* = 7.7, 7.0, 1.5 Hz, 1H), 7.19 (dd, *J* = 8.0, 4.8 Hz, 4H), 7.07 (d, *J* = 8.0 Hz, 2H), 6.81 (d, *J* = 9.5 Hz, 1H), 6.67 (q, *J* = 7.0 Hz, 1H), 2.29 (s, 3H), 1.58 (d, *J* = 7.0 Hz, 3H). <sup>13</sup>C NMR (126 MHz, Chloroform-*d*) δ 160.16, 138.88, 138.33, 136.93, 134.75, 131.69, 129.75, 128.46, 127.42, 123.79, 123.28, 121.42, 121.25, 119.44, 114.67, 20.09, 12.29. HRMS(ESI) *m/z*: calculated for [C<sub>19</sub>H<sub>17</sub>NO + H]<sup>+</sup> 276.1388, found 276.1385. IR ν 1646.61, 1587.11, 1447.27, 1328.26, 1244.96, 1215.21, 1134.88, 1039.67, 965.29, 810.58, 751.07, 658.84, cm<sup>-1</sup>. HPLC data (Chiralpak AD column, hexane : isopropanol = 85 : 15, 1.0 mL/min), *tr* = 19.8 min (major), *tr* = 13.0 min (minor), *ee* = 92%.

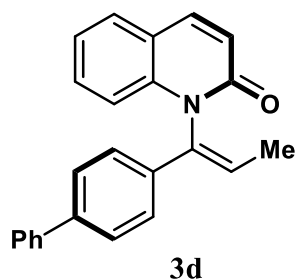

Following the general procedure **C**, **3d** was obtained as white solid (27 mg, 80% yield), m.p.185-186 °C. <sup>1</sup>H NMR (500 MHz, Chloroform-*d*) δ 7.84 (d, *J* = 9.6 Hz, 1H), 7.63 (dd, *J* = 7.6, 1.4 Hz, 1H), 7.52 (dd, *J* = 14.5, 8.0 Hz, 4H), 7.42 – 7.36 (m, 5H), 7.32 (t, *J* = 7.3 Hz, 1H), 7.25 – 7.21 (m, 2H), 6.84 (d, *J* = 9.6 Hz, 1H), 6.79 (q, *J* = 6.9 Hz, 1H), 1.63 (d, *J* = 7.0 Hz, 3H). <sup>13</sup>C NMR (126 MHz, Chloroform-*d*) δ 160.22, 139.85, 139.47, 139.05, 138.30, 134.51, 133.39, 129.88, 127.76, 127.54, 126.52, 126.37, 125.94, 124.40, 124.26, 121.57, 121.26, 119.48, 114.62, 12.46. HRMS(ESI) *m/z*: calculated for [C<sub>24</sub>H<sub>19</sub>NO + H]<sup>+</sup> 338.1545, found 338.1549. IR ν 1646.61, 1587.11, 1482.98, 1447.27, 1396.69, 1325.29, 1247.93, 1134.88, 959.34, 825.45, 757.02, 688.60, cm<sup>-1</sup>. HPLC data (Chiralpak AD column, hexane : isopropanol = 85 : 15, 1.0 mL/min), *tr* = 18.7 min (major), *tr* = 20.7 min (minor), *ee* = 97%.

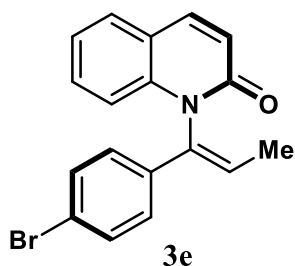

Following the general procedure **C**, **3e** was obtained as white solid (32 mg, 95% yield), m.p.142-143 °C. <sup>1</sup>H NMR (500 MHz, Chloroform-*d*) δ 7.82 (d, *J* = 9.5 Hz, 1H), 7.61 (dd, *J* = 7.8, 1.5 Hz, 1H), 7.42 – 7.37 (m, 3H), 7.22 (td, *J* = 7.5, 1.1 Hz, 1H), 7.17 – 7.12 (m, 3H), 6.80 (d, *J* = 9.6 Hz, 1H), 6.72 (q, *J* = 7.0 Hz, 1H), 1.59 (d, *J* = 7.0 Hz, 3H). <sup>13</sup>C NMR (126 MHz, Chloroform-*d*) δ 160.09, 139.13, 138.09, 133.95, 133.59, 130.91, 129.89, 127.61, 125.51, 125.27, 121.67, 121.16, 121.06, 119.47, 114.37, 12.48. HRMS(ESI) *m/z*: calculated for [C<sub>18</sub>H<sub>14</sub>BrNO + H]<sup>+</sup> 340.0337, found 340.0338. Isotopic MS, calculated 342.0317, found 342.0319. IR ν 1637.69, 1587.11, 1444.30, 1322.31, 1244.96, 1134.88, 1072.40, 1006.94, 962.31, 804.63, 757.02, 655.87, cm<sup>-1</sup>. HPLC data (Chiralpak AD column, hexane : isopropanol = 85 : 15, 1.0 mL/min), *tr* = 22.1 min (major), *tr* = 18.4 min (minor), *ee* = 94%.

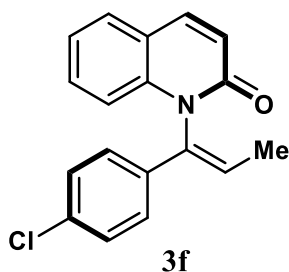

Following the general procedure **C**, **3f** was obtained as white solid (26 mg, 89% yield), m.p.120-121 °C. <sup>1</sup>H NMR (500 MHz, Chloroform-*d*) δ 7.82 (d, *J* = 9.5 Hz, 1H), 7.61 (dd, *J* = 7.8, 1.5 Hz, 1H), 7.40 (ddd, *J* = 8.6, 7.3, 1.5 Hz, 1H), 7.24 – 7.20 (m, 5H), 7.14 (d, *J* = 8.5 Hz, 1H), 6.80 (d, *J* = 9.5 Hz, 1H), 6.70 (q, *J* = 6.9 Hz, 1H), 1.59 (d, *J* = 7.0 Hz, 3H). <sup>13</sup>C NMR (126 MHz, Chloroform-*d*) δ 160.11, 139.14, 138.09, 133.88, 133.11, 132.88, 129.90, 127.96, 127.61, 125.21, 125.16, 121.68, 121.15, 119.47, 114.38, 12.46. HRMS(ESI) *m/z*: calculated for [C<sub>18</sub>H<sub>14</sub>ClNO + H]<sup>+</sup> 296.0842, found 296.0831. Isotopic MS, calculated 298.0813, found 298.0809. IR ν 1649.59, 1587.11, 1488.93, 1447.27, 1393.72, 1328.26, 1244.96, 1128.93, 1090.25, 1012.89, 813.55,

655.87,  $\text{cm}^{-1}$ . HPLC data (Chiralpak AD column, hexane : isopropanol = 85 : 15, 1.0 mL/min),  $t_r = 19.9$  min (major),  $t_r = 16.0$  min (minor), ee = 90%.

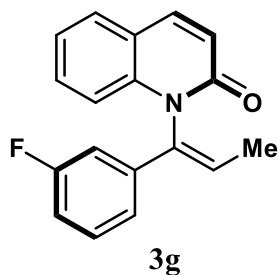

Following the general procedure **C**, **3g** was obtained as white solid (24 mg, 86% yield), m.p. 80-81 °C.  $^1\text{H}$  NMR (500 MHz, Chloroform-*d*)  $\delta$  7.87 (d,  $J = 9.6$  Hz, 1H), 7.66 (dd,  $J = 7.8, 1.4$  Hz, 1H), 7.44 (ddd,  $J = 8.6, 7.2, 1.5$  Hz, 1H), 7.31 – 7.26 (m, 2H), 7.19 (d,  $J = 8.5$  Hz, 1H), 7.13 – 7.09 (m, 1H), 7.02 (dt,  $J = 10.5, 2.2$  Hz, 1H), 6.96 (td,  $J = 8.3, 2.5$  Hz, 1H), 6.85 (d,  $J = 9.5$  Hz, 1H), 6.79 (q,  $J = 6.9$  Hz, 1H), 1.65 (d,  $J = 7.0$  Hz, 3H).  $^{13}\text{C}$  NMR (126 MHz, Chloroform-*d*)  $\delta$  160.10, 139.16, 138.12, 136.95 (d,  $J = 7.9$  Hz), 133.84, 129.89, 129.32 (d,  $J = 8.5$  Hz), 127.62, 125.92, 121.67, 121.14, 119.53 (d,  $J = 2.9$  Hz), 119.47, 114.37, 114.03, 113.86, 110.90 (d,  $J = 13.1$  Hz), 12.46.  $^{19}\text{F}$  NMR (470 MHz, Chloroform-*d*)  $\delta$  -112.77 – -112.85 (m). HRMS(ESI)  $m/z$ : calculated for  $[\text{C}_{18}\text{H}_{14}\text{FNO} + \text{H}]^+$  280.1138, found 280.1128. IR  $\nu$  1643.64, 1581.16, 1480.00, 1447.27, 1322.31, 1215.21, 1131.90, 911.74, 828.43, 783.80, 754.05, 667.77,  $\text{cm}^{-1}$ . HPLC data (Chiralpak AD column, hexane : isopropanol = 85 : 15, 1.0 mL/min),  $t_r = 21.9$  min (major),  $t_r = 13.3$  min (minor), ee = 90%.

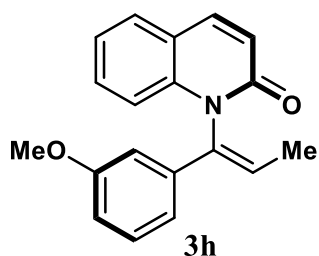

Following the general procedure **C**, **3h** was obtained as white solid (28 mg, 97% yield), m.p. 82-83 °C.  $^1\text{H}$  NMR (500 MHz, Chloroform-*d*)  $\delta$  7.81 (d,  $J = 9.5$  Hz, 1H), 7.60 (dd,  $J = 7.8, 1.4$  Hz, 1H), 7.41 – 7.37 (m, 1H), 7.22 – 7.16 (m, 3H), 6.87 (dd,  $J = 7.7, 1.7$  Hz, 1H), 6.84 – 6.77 (m, 3H), 6.72 (q,  $J = 6.9$  Hz, 1H), 3.74 (s, 3H), 1.59 (d,  $J = 6.9$  Hz, 3H).  $^{13}\text{C}$  NMR (126 MHz, Chloroform-*d*)  $\delta$  160.20, 158.90, 139.03, 138.28,



135.99, 134.58, 129.81, 128.80, 127.47, 124.80, 121.52, 121.14, 119.44, 116.45, 114.63, 112.17, 110.00, 54.20, 12.41. HRMS(ESI)  $m/z$ : calculated for  $[C_{19}H_{17}NO_2 + H]^+$  292.1338, found 292.1338. IR  $\nu$  1646.61, 1578.18, 1491.90, 1441.32, 1328.26, 1283.64, 1206.28, 1131.90, 1033.72, 834.38, 754.05, 688.60,  $cm^{-1}$ . HPLC data (Chiralpak AD column, hexane : isopropanol = 85 : 15, 1.0 mL/min),  $t_r$  = 32.0 min (major),  $t_r$  = 16.2 min (minor), ee = 90%.

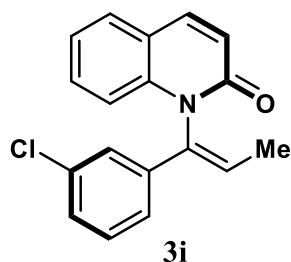

Following the general procedure C, **3i** was obtained as white waxy (25 mg, 85% yield).  $^1H$  NMR (500 MHz, Chloroform-*d*)  $\delta$  7.83 (d,  $J$  = 9.6 Hz, 1H), 7.62 (dd,  $J$  = 7.8, 1.5 Hz, 1H), 7.41 (ddd,  $J$  = 8.7, 7.2, 1.5 Hz, 1H), 7.30 (d,  $J$  = 2.1 Hz, 1H), 7.25 – 7.17 (m, 3H), 7.15 – 7.12 (m, 2H), 6.81 (d,  $J$  = 9.5 Hz, 1H), 6.74 (q,  $J$  = 7.0 Hz, 1H), 1.60 (d,  $J$  = 7.0 Hz, 3H).  $^{13}C$  NMR (126 MHz, Chloroform-*d*)  $\delta$  160.11, 139.20, 138.09, 136.53, 133.82, 133.72, 129.93, 129.05, 127.64, 127.15, 126.09, 124.02, 122.09, 121.70, 121.14, 119.48, 114.35, 12.49. HRMS(ESI)  $m/z$ : calculated for  $[C_{18}H_{14}ClNO + H]^+$  296.0842, found 296.0845. Isotopic MS, calculated 298.0813, found 298.0814. IR  $\nu$  1652.56, 1593.06, 1447.27, 1399.67, 1325.29, 1256.86, 1081.32, 1015.87, 870.08, 792.73, 751.07, 691.57,  $cm^{-1}$ . HPLC data (Chiralpak AD column, hexane : isopropanol = 85 : 15, 1.0 mL/min),  $t_r$  = 21.4 min (major),  $t_r$  = 12.6 min (minor), ee = 91%.

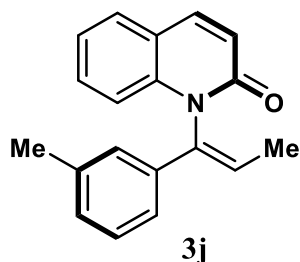

Following the general procedure C, **3j** was obtained as white solid (24 mg, 87% yield), m.p. 101-102 °C.  $^1H$  NMR (500 MHz, Chloroform-*d*)  $\delta$  7.82 (d,  $J$  = 9.5 Hz, 1H), 7.61

(dd,  $J = 8.2, 1.4$  Hz, 1H), 7.39 (td,  $J = 8.3, 7.8, 1.5$  Hz, 1H), 7.20 (t,  $J = 7.5$  Hz, 2H), 7.17 – 7.12 (m, 2H), 7.06 (t,  $J = 8.4$  Hz, 2H), 6.82 (d,  $J = 9.5$  Hz, 1H), 6.70 (q,  $J = 6.9$  Hz, 1H), 2.27 (s, 3H), 1.58 (d,  $J = 7.0$  Hz, 3H).  $^{13}\text{C}$  NMR (126 MHz, Chloroform-*d*)  $\delta$  160.20, 138.93, 138.35, 137.33, 134.91, 134.45, 129.77, 127.94, 127.65, 127.44, 124.49, 124.17, 121.44, 121.26, 121.07, 119.45, 114.68, 20.52, 12.36. HRMS(ESI)  $m/z$ : calculated for  $[\text{C}_{19}\text{H}_{17}\text{NO} + \text{H}]^+$  276.1388, found 276.1382. IR  $\nu$  1640.66, 1584.13, 1557.36, 1488.93, 1447.27, 1322.31, 1244.96, 1128.93, 831.40, 754.05, 697.52, 655.87,  $\text{cm}^{-1}$ . HPLC data (Chiralpak AD column, hexane : isopropanol = 85 : 15, 1.0 mL/min),  $t_r = 20.0$  min (major),  $t_r = 11.0$  min (minor), ee = 90%.

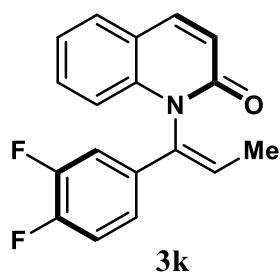

Following the general procedure **C**, **3k** was obtained as white solid (28 mg, 93% yield), m.p. 100-101 °C.  $^1\text{H}$  NMR (500 MHz, Chloroform-*d*)  $\delta$  7.83 (d,  $J = 9.5$  Hz, 1H), 7.62 (dd,  $J = 7.8, 1.5$  Hz, 1H), 7.42 (ddd,  $J = 8.6, 7.3, 1.5$  Hz, 1H), 7.25 – 7.21 (m, 1H), 7.14 – 6.99 (m, 4H), 6.80 (d,  $J = 9.5$  Hz, 1H), 6.66 (q,  $J = 7.0$  Hz, 1H), 1.59 (d,  $J = 7.0$  Hz, 3H).  $^{13}\text{C}$  NMR (126 MHz, Chloroform-*d*)  $\delta$  160.05, 139.25, 137.98, 133.10, 129.96, 127.71, 125.73, 121.79, 121.11, 120.06 (d,  $J = 3.4$  Hz), 120.01 (d,  $J = 3.6$  Hz), 119.48, 116.68, 116.54, 114.20, 113.16, 113.01, 12.46.  $^{19}\text{F}$  NMR (470 MHz, Chloroform-*d*)  $\delta$  -137.05 (ddd,  $J = 20.4, 11.7, 7.7$  Hz), -138.23 (dtd,  $J = 21.6, 8.3, 7.8, 4.3$  Hz). HRMS(ESI)  $m/z$ : calculated for  $[\text{C}_{18}\text{H}_{13}\text{F}_2\text{NO} + \text{H}]^+$  298.1043, found 298.1039. IR  $\nu$  1637.69, 1584.13, 1515.70, 1420.50, 1283.64, 1244.96, 1131.90, 938.51, 858.18, 828.43, 762.98, 605.29,  $\text{cm}^{-1}$ . HPLC data (Chiralpak AD column, hexane : isopropanol = 85 : 15, 1.0 mL/min),  $t_r = 11.1$  min (major),  $t_r = 13.1$  min (minor), ee = 90%.

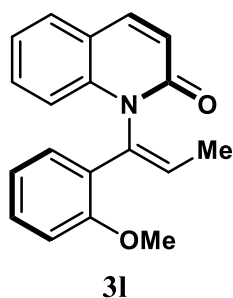

Following the general procedure **C**, **31** was obtained as white solid (16 mg, 55% yield) (*Z:E*=15.3:1), m.p.216-127 °C. <sup>1</sup>H NMR (500 MHz, Chloroform-*d*) δ 7.78 (d, *J* = 8.6 Hz, 1H), 7.57 (d, *J* = 7.6 Hz, 1H), 7.39 (t, *J* = 7.8 Hz, 1H), 7.29 (d, *J* = 8.4 Hz, 1H), 7.18 (td, *J* = 7.5, 3.7 Hz, 2H), 6.99 (d, *J* = 7.6 Hz, 1H), 6.93 (t, *J* = 7.1 Hz, 2H), 6.80 (q, *J* = 7.8, 5.7 Hz, 2H), 3.85 (s, 3H), 1.59 (d, *J* = 6.9 Hz, 3H). <sup>13</sup>C NMR (126 MHz, Chloroform-*d*) δ 156.35, 138.85, 138.46, 130.73, 129.54, 129.45, 127.81, 127.25, 123.63, 121.28, 121.26, 119.78, 119.45, 115.10, 110.44, 54.52, 12.81. IR ν 1646.61, 1584.13, 1488.93, 1444.30, 1325.29, 1247.93, 1120.00, 1021.82, 890.91, 831.40, 760.00, 632.07, cm<sup>-1</sup>. HRMS(ESI) *m/z*: calculated for [C<sub>19</sub>H<sub>17</sub>NO<sub>2</sub> + H]<sup>+</sup> 292.1338, found 292.1328. HPLC data (Chiralpak AD column, hexane : isopropanol = 85 : 15, 1.0 mL/min), *tr* = 11.7 min (major), *tr* = 13.2 min (minor), *ee* = 18%.

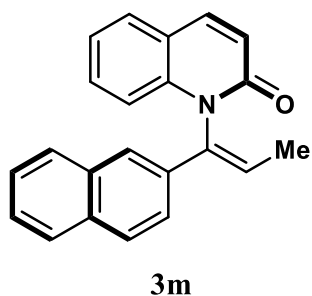

Following the general procedure **C**, **3m** was obtained as white solid (26 mg, 84% yield), m.p.194-195 °C. <sup>1</sup>H NMR (500 MHz, Chloroform-*d*) δ 7.87 (d, *J* = 9.6 Hz, 1H), 7.78 (dd, *J* = 15.6, 7.9 Hz, 2H), 7.66 – 7.62 (m, 3H), 7.51 (d, *J* = 1.8 Hz, 1H), 7.42 – 7.35 (m, 3H), 7.23 – 7.19 (m, 2H), 6.90 – 6.85 (m, 2H), 1.66 (d, *J* = 7.0 Hz, 3H). <sup>13</sup>C NMR (126 MHz, Chloroform-*d*) δ 160.27, 139.12, 138.32, 134.91, 132.39, 132.07, 131.76, 129.84, 127.63, 127.52, 127.33, 126.50, 125.25, 125.15, 125.03, 122.84, 121.88, 121.56, 121.26, 119.52, 114.71, 12.54. HRMS(ESI) *m/z*: calculated for [C<sub>22</sub>H<sub>17</sub>NO + H]<sup>+</sup> 312.1388, found 312.1376. IR ν 1643.64, 1584.13, 1488.93,

1447.27, 1328.26, 1250.91, 1221.16, 1188.43, 858.18, 819.50, 751.07, 664.79,  $\text{cm}^{-1}$ .  
HPLC data (Chiralpak AD column, hexane : isopropanol = 85 : 15, 1.0 mL/min),  $t_r$  = 34.8 min (major),  $t_r$  = 21.9 min (minor), ee = 90%.

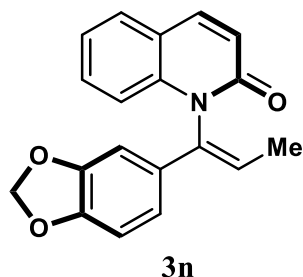

Following the general procedure **C**, **3n** was obtained as white solid (28 mg, 91% yield), m.p.126-127 °C.  $^1\text{H}$  NMR (500 MHz, Chloroform-*d*)  $\delta$  7.80 (d,  $J$  = 9.6 Hz, 1H), 7.60 (dd,  $J$  = 7.8, 1.5 Hz, 1H), 7.40 (ddd,  $J$  = 8.6, 7.2, 1.5 Hz, 1H), 7.22 – 7.17 (m, 2H), 6.83 – 6.79 (m, 2H), 6.73 – 6.67 (m, 2H), 6.55 (q,  $J$  = 7.0 Hz, 1H), 5.91 – 5.90 (m, 2H), 1.56 (d,  $J$  = 7.0 Hz, 3H).  $^{13}\text{C}$  NMR (126 MHz, Chloroform-*d*)  $\delta$  160.12, 147.18, 146.60, 138.97, 138.24, 134.37, 129.78, 129.01, 127.47, 122.97, 121.51, 121.21, 119.45, 117.86, 114.61, 107.46, 104.51, 100.19, 12.31. HRMS(ESI)  $m/z$ : calculated for  $[\text{C}_{19}\text{H}_{15}\text{NO}_3 + \text{H}]^+$  306.1130, found 306.1126. IR  $\nu$  1640.66, 1587.11, 1497.85, 1399.67, 1322.31, 1221.16, 1161.65, 1033.72, 935.54, 831.40, 760.00, 596.36,  $\text{cm}^{-1}$ . HPLC data (Chiralpak AD column, hexane : isopropanol = 80 : 20, 1.0 mL/min),  $t_r$  = 25.7 min (major),  $t_r$  = 14.2 min (minor), ee = 89%.

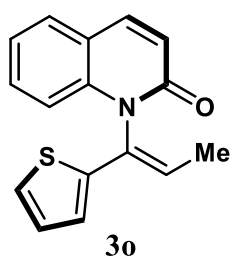

Following the general procedure **C**, **3o** was obtained as yellow solid (25 mg, 95% yield)( $Z:E=4.0:1$ ), m.p.82-83 °C.  $^1\text{H}$  NMR (500 MHz, Chloroform-*d*)  $\delta$  7.80 (d,  $J$  = 9.6 Hz, 1H), 7.60 (dd,  $J$  = 7.8, 1.4 Hz, 1H), 7.46 – 7.39 (m, 1H), 7.25 – 7.19 (m, 2H), 7.12 (d,  $J$  = 5.1 Hz, 1H), 6.84 (dd,  $J$  = 5.1, 3.7 Hz, 1H), 6.79 (d,  $J$  = 9.6 Hz, 1H), 6.63 (d,  $J$  = 3.7 Hz, 1H), 6.58 (q,  $J$  = 7.0 Hz, 1H), 1.57 (d,  $J$  = 7.0 Hz, 3H).  $^{13}\text{C}$  NMR (126 MHz, Chloroform-*d*)  $\delta$  159.85, 139.23, 139.09, 138.80, 138.01, 130.03, 129.85,

129.45, 127.47, 127.30, 126.52, 126.15, 125.85, 125.23, 123.81, 123.70, 122.86, 121.62, 121.36, 121.28, 121.12, 119.42, 119.36, 114.94, 114.52, 13.85, 12.00. HRMS(ESI)  $m/z$ : calculated for  $[C_{16}H_{13}NOS + H]^+$  268.0796, found 268.0787. IR  $\nu$  1646.61, 1590.08, 1488.93, 1438.35, 1319.34, 1250.91, 1221.16 1033.72, 935.54, 831.40, 760.00, 664.79,  $cm^{-1}$ . HPLC data (Chiralpak AD column, hexane : isopropanol = 85 : 15, 1.0 mL/min),  $tr$  = 12.4 min (*Z*-major),  $tr$  = 14.5 min (*Z*-minor),  $ee$  = 96%,  $tr$  = 10.9 min (*E*-major),  $tr$  = 16.3 min (*E*-minor),  $ee$  = 91%.

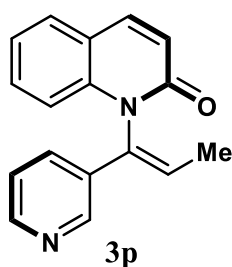

Following the general procedure C, **3p** was obtained as white solid (22 mg, 84% yield), m.p.94-95 °C.  $^1H$  NMR (500 MHz, Chloroform-*d*)  $\delta$  8.64 (d,  $J$  = 2.4 Hz, 1H), 8.47 (dd,  $J$  = 4.9, 1.5 Hz, 1H), 7.83 (d,  $J$  = 9.6 Hz, 1H), 7.62 (dd,  $J$  = 7.8, 1.4 Hz, 1H), 7.51 (ddd,  $J$  = 8.1, 2.5, 1.6 Hz, 1H), 7.41 (ddd,  $J$  = 8.6, 7.2, 1.5 Hz, 1H), 7.24 – 7.14 (m, 3H), 6.81 – 6.77 (m, 2H), 1.64 (d,  $J$  = 7.0 Hz, 3H).  $^{13}C$  NMR (126 MHz, Chloroform-*d*)  $\delta$  160.09, 147.99, 145.62, 139.28, 137.93, 132.25, 131.31, 130.48, 130.00, 127.74, 126.79, 122.48, 121.82, 121.07, 119.51, 114.15, 12.47. HRMS(ESI)  $m/z$ : calculated for  $[C_{17}H_{14}N_2O + H]^+$  263.1184, found 263.1171. IR  $\nu$  1637.69, 1590.08, 1482.98, 1444.30, 1244.96, 1212.23, 1134.88, 962.31, 837.36, 762.98, 706.45, 620.17,  $cm^{-1}$ . HPLC data (Chiralpak AD column, hexane : isopropanol = 85 : 15, 1.0 mL/min),  $tr$  = 28.8 min (major),  $tr$  = 24.8 min (minor),  $ee$  = 94%.

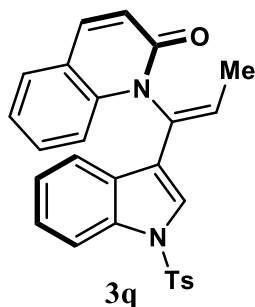

Following the general procedure **C**, **3q** was obtained as white solid (30 mg, 66% yield) (*Z:E*=6.1:1), m.p.78-79 °C. <sup>1</sup>H NMR (500 MHz, Chloroform-*d*) δ 7.94 (t, *J* = 8.9 Hz, 1H), 7.84 (dd, *J* = 13.5, 8.6 Hz, 2H), 7.62 (dd, *J* = 10.9, 7.9 Hz, 3H), 7.31 (dt, *J* = 20.4, 7.6 Hz, 3H), 7.25 – 7.19 (m, 2H), 7.14 (t, *J* = 8.2 Hz, 3H), 6.84 (d, *J* = 9.5 Hz, 1H), 6.74 (q, *J* = 6.7 Hz, 1H), 2.31 (s, 3H), 1.63 (d, *J* = 6.9 Hz, 3H). <sup>13</sup>C NMR (126 MHz, Chloroform-*d*) δ 159.99, 144.07, 139.30, 139.21, 138.77, 137.96, 134.71, 133.64, 129.78, 128.91, 128.64, 127.61, 127.53, 126.94, 125.92, 125.87, 125.81, 124.06, 123.36, 122.83, 122.60, 121.67, 121.33, 121.28, 121.09, 119.93, 119.65, 119.62, 119.51, 119.49, 118.16, 114.78, 114.45, 112.94, 112.62, 20.56, 14.33, 12.13. HRMS(ESI) *m/z*: calculated for [C<sub>27</sub>H<sub>22</sub>N<sub>2</sub>O<sub>3</sub>S + H]<sup>+</sup> 455.1429, found 455.1429. IR ν 1649.59, 1590.08, 1557.36, 1444.30, 1363.97, 1173.55, 1125.95, 980.17, 825.45, 745.12, 667.77, 569.59, cm<sup>-1</sup>. HPLC data (Chiralpak AD column, hexane : isopropanol = 80 : 20, 1.0 mL/min), *tr* = 18.2 min (*E*-major), *tr* = 38.8 min (*E*-minor), *ee* =70%, *tr* = 20.7 min (*E*-major), *tr* = 6.8 min (*E*-minor), *ee* =70%.

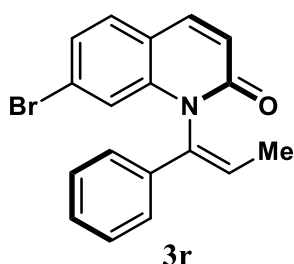

Following the general procedure **C**, **3r** was obtained as yellow waxy (32 mg, 94% yield). <sup>1</sup>H NMR (500 MHz, Chloroform-*d*) δ 7.76 (d, *J* = 9.6 Hz, 1H), 7.46 (d, *J* = 8.2 Hz, 1H), 7.34 – 7.31 (m, 2H), 7.30 – 7.26 (m, 5H), 6.81 (d, *J* = 9.6 Hz, 1H), 6.73 (q, *J* = 7.0 Hz, 1H), 1.61 (d, *J* = 6.9 Hz, 3H). <sup>13</sup>C NMR (126 MHz, Chloroform-*d*) δ 159.80, 139.27, 138.38, 134.42, 134.05, 128.69, 127.89, 127.29, 124.88, 124.85, 124.31, 123.81, 121.55, 118.22, 117.29, 12.45. HRMS(ESI) *m/z*: calculated for [C<sub>18</sub>H<sub>14</sub>BrNO + H]<sup>+</sup> 340.0337, found 340.0337. Isotopic MS, calculated 342.0317, found 342.0317. IR ν 1646.61, 1581.16, 1545.45, 1414.55, 1241.98, 1134.88, 1078.35, 1000.99, 837.36, 771.90, 691.57, 632.07, cm<sup>-1</sup>. HPLC data (Chiralpak AD column, hexane : isopropanol = 85 : 15, 1.0 mL/min), *tr* = 11.8 min (major), *tr* = 8.9 min (minor), *ee* = 89%.

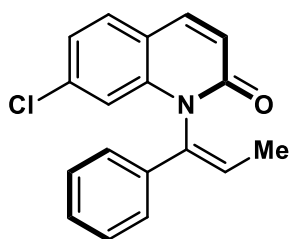

**3s**

Following the general procedure **C**, **3s** was obtained as white waxy (29 mg, 98% yield). <sup>1</sup>H NMR (500 MHz, Chloroform-*d*) δ 7.77 (d, *J* = 9.6 Hz, 1H), 7.53 – 7.51 (m, 1H), 7.29 – 7.24 (m, 5H), 7.17 (d, *J* = 7.4 Hz, 2H), 6.79 (d, *J* = 9.6 Hz, 1H), 6.73 (q, *J* = 7.0 Hz, 1H), 1.61 (d, *J* = 7.0 Hz, 3H). <sup>13</sup>C NMR (126 MHz, Chloroform-*d*) δ 159.90, 139.18, 138.31, 136.06, 134.45, 134.03, 128.60, 127.89, 127.29, 124.82, 123.81, 122.08, 121.30, 117.90, 114.37, 12.43. HRMS(ESI) *m/z*: calculated for [C<sub>18</sub>H<sub>14</sub>ClNO + H]<sup>+</sup> 296.0842, found 296.0841. Isotopic MS, calculated 298.0813, found 298.0814. IR ν 1652.56, 1584.13, 1548.43, 1491.90, 1423.47, 1319.34, 1206.28, 1134.88, 1087.27, 840.33, 751.07, 694.55, cm<sup>-1</sup>. HPLC data (Chiralpak AD column, hexane : isopropanol = 85 : 15, 1.0 mL/min), *tr* = 11.3 min (major), *tr* = 8.4 min (minor), *ee* = 91%.

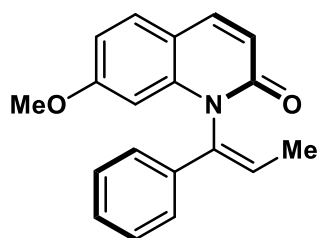

**3t**

Following the general procedure **C**, **3t** was obtained as yellow solid (21 mg, 74% yield) (*Z:E*=16.8:1), m.p.101-102 °C. <sup>1</sup>H NMR (500 MHz, Chloroform-*d*) δ 7.78 (d, *J* = 9.5 Hz, 1H), 7.54 (d, *J* = 8.6 Hz, 1H), 7.36 – 7.32 (m, 2H), 7.31 – 7.27 (m, 3H), 6.83 (dd, *J* = 8.6, 2.4 Hz, 1H), 6.75 (q, *J* = 6.9 Hz, 1H), 6.72 – 6.68 (m, 2H), 3.76 (s, 3H), 1.67 (d, *J* = 6.9 Hz, 3H). <sup>13</sup>C NMR (101 MHz, Chloroform-*d*) δ 161.92, 161.71, 140.96, 139.83, 135.95, 135.49, 129.84, 128.80, 128.09, 125.52, 124.96, 118.93, 114.71, 110.41, 99.69, 55.46, 13.46. HRMS(ESI) *m/z*: calculated for [C<sub>19</sub>H<sub>17</sub>NO<sub>2</sub> + H]<sup>+</sup> 292.1338, found 292.1336. IR ν 1637.69, 1584.13, 1548.43, 1405.62, 1360.99, 1221.16, 1146.78, 1018.84, 831.40, 754.05, 691.57, 635.04, cm<sup>-1</sup>. HPLC data

(Chiralpak AD column, hexane : isopropanol = 85 : 15, 1.0 mL/min),  $t_r$  = 22.6 min (major),  $t_r$  = 15.0 min (minor), ee = 87%.

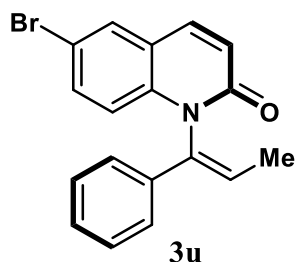

Following the general procedure **C**, **3u** was obtained as yellow waxy (29 mg, 86% yield).  $^1\text{H}$  NMR (500 MHz, Chloroform-*d*)  $\delta$  7.74 – 7.72 (m, 2H), 7.46 (dd,  $J$  = 9.0, 2.3 Hz, 1H), 7.30 – 7.22 (m, 5H), 7.06 (d,  $J$  = 9.0 Hz, 1H), 6.83 (d,  $J$  = 9.5 Hz, 1H), 6.72 (q,  $J$  = 7.0 Hz, 1H), 1.60 (d,  $J$  = 7.0 Hz, 3H).  $^{13}\text{C}$  NMR (126 MHz, Chloroform-*d*)  $\delta$  159.68, 137.72, 137.26, 134.47, 134.08, 132.55, 129.64, 127.87, 127.27, 124.70, 123.77, 122.51, 120.90, 116.42, 114.33, 12.41. HRMS(ESI)  $m/z$ : calculated for  $[\text{C}_{18}\text{H}_{14}\text{BrNO} + \text{H}]^+$  340.0337, found 340.0335. Isotopic MS, calculated 342.0317, found 342.0316. IR  $\nu$  1658.51, 1584.13, 1554.38, 1474.05, 1417.52, 1280.66, 1241.98, 1018.84, 893.88, 813.55, 754.05, 691.57,  $\text{cm}^{-1}$ . HPLC data (Chiralpak AD column, hexane : isopropanol = 85 : 15, 1.0 mL/min),  $t_r$  = 17.2 min (major),  $t_r$  = 11.5 min (minor), ee = 92%.

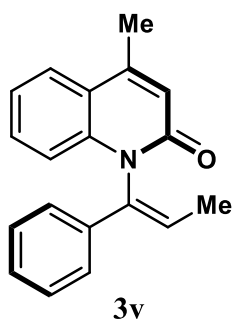

Following the general procedure **C**, **3v** was obtained as white solid (19 mg, 69% yield), m.p. 131-132 °C.  $^1\text{H}$  NMR (500 MHz, Chloroform-*d*)  $\delta$  7.74 (dd,  $J$  = 8.0, 1.5 Hz, 1H), 7.39 (ddd,  $J$  = 8.6, 7.2, 1.5 Hz, 1H), 7.30 – 7.24 (m, 4H), 7.24 – 7.20 (m, 3H), 6.74 – 6.70 (m, 2H), 2.55 (d,  $J$  = 1.2 Hz, 3H), 1.60 (d,  $J$  = 7.0 Hz, 3H).  $^{13}\text{C}$  NMR (126 MHz, Chloroform-*d*)  $\delta$  159.92, 146.58, 137.96, 134.79, 134.63, 129.61, 127.73, 126.99, 124.45, 124.01, 123.88, 121.30, 120.50, 120.17, 114.90, 18.18, 12.40. HRMS(ESI)  $m/z$ : calculated for  $[\text{C}_{19}\text{H}_{17}\text{NO} + \text{H}]^+$  276.1388, found 276.1382. IR  $\nu$



1637.69, 1587.11, 1488.93, 1450.25, 1387.77, 1313.39, 1075.37, 968.26, 864.13, 757.02, 688.60, 563.64,  $\text{cm}^{-1}$ . HPLC data (Chiralpak AD column, hexane : isopropanol = 85 : 15, 1.0 mL/min),  $t_r$  = 19.4 min (major),  $t_r$  = 14.5 min (minor), ee = 92%.

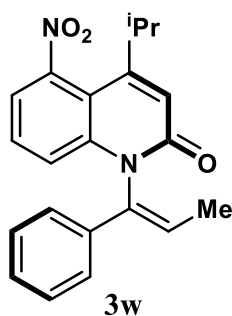

Following the general procedure C, **3w** was obtained as white solid (27 mg, 78% yield), m.p. 104-105 °C.  $^1\text{H}$  NMR (500 MHz, Chloroform-*d*)  $\delta$  8.76 (d,  $J$  = 2.4 Hz, 1H), 8.21 (dd,  $J$  = 9.3, 2.4 Hz, 1H), 7.33 – 7.25 (m, 6H), 6.86 (s, 1H), 6.76 (q,  $J$  = 6.9 Hz, 1H), 3.54-3.48 (m, 1H), 1.61 (d,  $J$  = 7.0 Hz, 3H), 1.44 (dd,  $J$  = 6.8, 2.0 Hz, 6H).  $^{13}\text{C}$  NMR (126 MHz, Chloroform-*d*)  $\delta$  160.01, 156.01, 142.54, 141.55, 134.36, 133.77, 127.99, 127.51, 125.16, 124.01, 123.71, 119.86, 118.71, 118.47, 115.95, 27.80, 21.33, 12.48. HRMS(ESI)  $m/z$ : calculated for  $[\text{C}_{21}\text{H}_{20}\text{N}_2\text{O}_3 + \text{H}]^+$  349.1552, found 349.1542. IR  $\nu$  1670.41, 1593.06, 1518.68, 1429.42, 1337.19, 1271.74, 1099.17, 902.81, 867.11, 828.43, 760.00, 688.60,  $\text{cm}^{-1}$ . HPLC data (Chiralpak AD column, hexane : isopropanol = 85 : 15, 1.0 mL/min),  $t_r$  = 18.9 min (major),  $t_r$  = 25.3 min (minor), ee = 89%.

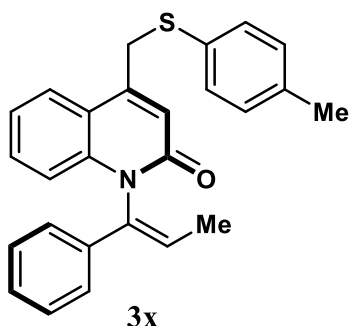

Following the general procedure C, **3x** was obtained as white waxy (30 mg, 76% yield).  $^1\text{H}$  NMR (400 MHz, Chloroform-*d*)  $\delta$  7.93 (d,  $J$  = 8.1 Hz, 1H), 7.43 (t,  $J$  = 7.9 Hz, 1H), 7.28 (s, 6H), 7.25 (d,  $J$  = 10.3 Hz, 3H), 7.12 (d,  $J$  = 7.7 Hz, 2H), 6.73 (q,  $J$  =

7.0 Hz, 1H), 6.53 (s, 1H), 4.24 (s, 2H), 2.35 (s, 3H), 1.59 (d,  $J = 6.9$  Hz, 3H).  $^{13}\text{C}$  NMR (101 MHz, Chloroform- $d$ )  $\delta$  160.46, 146.15, 139.45, 138.21, 135.71, 135.45, 132.76, 130.84, 130.44, 129.96, 128.79, 128.10, 125.49, 125.28, 124.86, 122.43, 121.97, 119.19, 116.22, 37.66, 21.19, 13.39. HRMS(ESI)  $m/z$ : calculated for  $[\text{C}_{26}\text{H}_{23}\text{NOS} + \text{H}]^+$  398.1579, found 398.1567. IR  $\nu$  1646.61, 1593.06, 1563.31, 1488.93, 1444.30, 1387.77, 1304.46, 1069.42, 870.08, 807.60, 751.07, 688.60,  $\text{cm}^{-1}$ . HPLC data (Chiralpak AD column, hexane : isopropanol = 85 : 15, 1.0 mL/min),  $t_r = 26.9$  min (major),  $t_r = 20.1$  min (minor), ee = 86%.

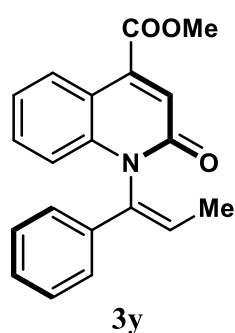

Following the general procedure **C**, **3y** was obtained as white solid (22 mg, 69% yield), m.p. 158-159 °C.  $^1\text{H}$  NMR (400 MHz, Chloroform- $d$ )  $\delta$  8.38 (d,  $J = 8.1$  Hz, 1H), 7.46 (t,  $J = 7.8$  Hz, 1H), 7.33 (s, 1H), 7.28 (d,  $J = 7.8$  Hz, 7H), 6.76 (q,  $J = 6.9$  Hz, 1H), 4.05 (s, 3H), 1.62 (d,  $J = 6.9$  Hz, 3H).  $^{13}\text{C}$  NMR (101 MHz, Chloroform- $d$ )  $\delta$  174.71, 165.88, 160.11, 139.70, 139.59, 135.57, 135.03, 131.42, 128.87, 128.27, 126.97, 125.65, 124.83, 123.14, 117.25, 116.04, 53.01, 13.45. HRMS(ESI)  $m/z$ : calculated for  $[\text{C}_{20}\text{H}_{17}\text{NO}_3 + \text{H}]^+$  320.1287, found 320.1281. IR  $\nu$  1735.87, 1649.59, 1593.06, 1438.35, 1227.11, 1152.73, 1018.84, 887.93, 786.78, 757.02, 679.67, 584.46,  $\text{cm}^{-1}$ . HPLC data (Chiralpak AD column, hexane : isopropanol = 85 : 15, 1.0 mL/min),  $t_r = 27.3$  min (major),  $t_r = 21.0$  min (minor), ee = 75%.

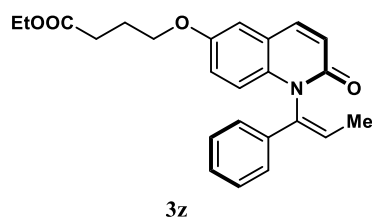

Following the general procedure **C**, **3z** was obtained as white waxy (35 mg, 89% yield).  $^1\text{H}$  NMR (500 MHz, Chloroform- $d$ )  $\delta$  7.74 (d,  $J = 9.6$  Hz, 1H), 7.32 – 7.20 (m,

5H), 7.10 (d,  $J = 9.2$  Hz, 1H), 7.04 (d,  $J = 2.8$  Hz, 1H), 6.99 (dd,  $J = 9.2, 2.8$  Hz, 1H), 6.81 (d,  $J = 9.6$  Hz, 1H), 6.71 (q,  $J = 7.0$  Hz, 1H), 4.14 (q,  $J = 7.1$  Hz, 2H), 4.03 (t,  $J = 6.1$  Hz, 2H), 2.51 (t,  $J = 7.3$  Hz, 2H), 2.11-2.09 (m, 2H), 1.59 (d,  $J = 7.0$  Hz, 3H), 1.24 (d,  $J = 7.2$  Hz, 3H).  $^{13}\text{C}$  NMR (126 MHz, Chloroform- $d$ )  $\delta$  172.12, 159.77, 153.23, 138.46, 134.84, 134.46, 132.75, 127.76, 127.05, 124.39, 123.85, 121.77, 120.13, 118.86, 115.98, 109.94, 66.24, 59.48, 29.70, 23.56, 13.22, 12.39. HRMS(ESI)  $m/z$ : calculated for  $[\text{C}_{24}\text{H}_{25}\text{NO}_4 + \text{H}]^+$  392.1862, found 392.1860. IR  $\nu$  1729.92, 1649.59, 1560.33, 1494.88, 1435.37, 1244.96, 1173.55, 1027.77, 971.24, 813.55, 760.00, 688.60,  $\text{cm}^{-1}$ . HPLC data (Chiralpak AD column, hexane : isopropanol = 70 : 30, 1.0 mL/min),  $t_r = 29.9$  min (major),  $t_r = 9.2$  min (minor), ee = 90%.

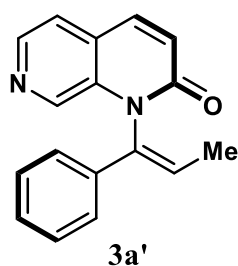

Following the general procedure **C**, **3a'** was obtained as white waxy (25 mg, 96% yield).  $^1\text{H}$  NMR (500 MHz, Chloroform- $d$ )  $\delta$  8.57 (s, 1H), 8.42 (d,  $J = 5.1$  Hz, 1H), 7.79 (d,  $J = 9.6$  Hz, 1H), 7.46 (d,  $J = 5.1$  Hz, 1H), 7.28 – 7.23 (m, 5H), 7.01 (d,  $J = 9.6$  Hz, 1H), 6.75 (q,  $J = 7.0$  Hz, 1H), 1.62 (d,  $J = 7.0$  Hz, 3H).  $^{13}\text{C}$  NMR (126 MHz, Chloroform- $d$ )  $\delta$  159.21, 141.80, 137.57, 137.02, 134.07, 133.66, 133.51, 127.92, 127.43, 126.65, 125.27, 124.05, 123.87, 119.66, 12.52. HRMS(ESI)  $m/z$ : calculated for  $[\text{C}_{17}\text{H}_{14}\text{N}_2\text{O} + \text{H}]^+$  263.1184, found 263.1180. IR  $\nu$  1658.51, 1578.18, 1488.93, 1417.52, 1337.19, 1241.98, 1137.85, 956.36, 849.26, 760.00, 688.60, 566.61,  $\text{cm}^{-1}$ . HPLC data (Chiralpak AD column, hexane : isopropanol = 85 : 15, 1.0 mL/min),  $t_r = 16.8$  min (major),  $t_r = 14.9$  min (minor), ee = 86%.

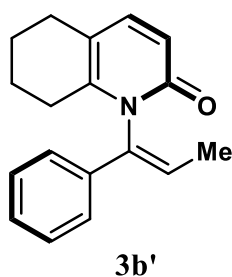

Following the general procedure **C**, **3b'** was obtained as yellow waxy (19 mg, 72% yield).  $^1\text{H}$  NMR (500 MHz, Chloroform-*d*)  $\delta$  7.34 – 7.22 (m, 6H), 6.61 – 6.57 (m, 2H), 2.56 (d,  $J$  = 5.8 Hz, 2H), 2.46 (dt,  $J$  = 14.8, 6.0 Hz, 1H), 2.26 (dt,  $J$  = 12.2, 5.2 Hz, 1H), 1.70 (dd,  $J$  = 11.4, 6.4 Hz, 7H).  $^{13}\text{C}$  NMR (126 MHz, Chloroform-*d*)  $\delta$  161.22, 142.20, 141.46, 135.81, 134.59, 127.77, 126.95, 123.58, 122.92, 117.33, 113.44, 26.11, 25.56, 21.24, 20.90, 12.33. HRMS(ESI)  $m/z$ : calculated for  $[\text{C}_{18}\text{H}_{19}\text{NO} + \text{H}]^+$  266.1545, found 266.1543. IR  $\nu$  1655.54, 1590.08, 1536.53, 1491.90, 1372.89, 1319.34, 1170.58, 962.31, 816.53, 754.05, 724.30, 688.60,  $\text{cm}^{-1}$ . HPLC data (Chiralpak AD column, hexane : isopropanol = 85 : 15, 1.0 mL/min),  $t_r$  = 17.0 min (major),  $t_r$  = 9.8 min (minor), ee = 99%.

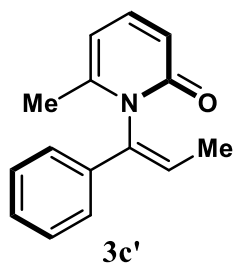

Following the general procedure **C**, **3c'** was obtained as yellow solid (17 mg, 76% yield), m.p. 106–107 °C.  $^1\text{H}$  NMR (400 MHz, Chloroform-*d*)  $\delta$  7.38 – 7.26 (m, 6H), 6.60 (t,  $J$  = 7.1 Hz, 2H), 6.15 (d,  $J$  = 6.8 Hz, 1H), 2.10 (d,  $J$  = 2.2 Hz, 3H), 1.68 (dd,  $J$  = 7.1, 2.2 Hz, 3H).  $^{13}\text{C}$  NMR (101 MHz, Chloroform-*d*)  $\delta$  163.03, 146.51, 139.92, 137.15, 135.32, 128.84, 128.13, 124.58, 123.95, 118.36, 106.39, 20.07, 13.32. HRMS(ESI)  $m/z$ : calculated for  $[\text{C}_{15}\text{H}_{15}\text{NO} + \text{H}]^+$  226.1232, found 226.1229. IR  $\nu$  1649.59, 1578.18, 1539.50, 1491.90, 1390.74, 1250.91, 1134.88, 890.91, 789.75, 762.98, 691.57, 626.12,  $\text{cm}^{-1}$ . HPLC data (Chiralpak AD column, hexane : isopropanol = 85 : 15, 1.0 mL/min),  $t_r$  = 16.2 min (major),  $t_r$  = 9.9 min (minor), ee = 97%.

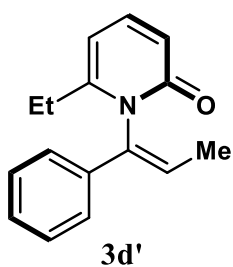

Following the general procedure **C**, **3d'** was obtained as white solid (19 mg, 79% yield), m.p.108-109 °C. <sup>1</sup>H NMR (500 MHz, Chloroform-*d*) δ 7.40 (dd, *J* = 9.2, 6.9 Hz, 1H), 7.31 – 7.28 (m, 2H), 7.26 – 7.22 (m, 3H), 6.60 – 6.56 (m, 2H), 6.12 (d, *J* = 6.9 Hz, 1H), 2.48 – 2.40 (m, 1H), 2.35 – 2.28 (m, 1H), 1.66 (d, *J* = 7.0 Hz, 3H), 1.08 (t, *J* = 7.4 Hz, 3H). <sup>13</sup>C NMR (126 MHz, Chloroform-*d*) δ 161.82, 150.66, 138.77, 135.65, 134.64, 127.80, 127.03, 123.56, 123.27, 117.28, 102.85, 24.34, 12.49, 10.94. HRMS(ESI) *m/z*: calculated for [C<sub>16</sub>H<sub>17</sub>NO + H]<sup>+</sup> 240.1388, found 240.1377. IR ν 1652.56, 1578.18, 1491.90, 1325.29, 1233.06, 1128.93, 1075.37, 965.29, 804.63, 760.00, 697.52, 623.14, cm<sup>-1</sup>. HPLC data (Chiralpak AD column, hexane : isopropanol = 85 : 15, 1.0 mL/min), *tr* = 16.3 min (major), *tr* = 9.3 min (minor), *ee* = 99%.

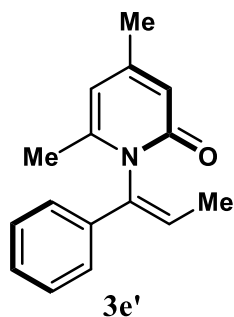

Following the general procedure **C**, **3e'** was obtained as white solid (18 mg, 76% yield), m.p.76-77 °C. <sup>1</sup>H NMR (500 MHz, Chloroform-*d*) δ 7.31 – 7.23 (m, 5H), 6.56 (q, *J* = 6.9 Hz, 1H), 6.38 (s, 1H), 5.98 (s, 1H), 2.20 – 2.19 (m, 3H), 2.04 (s, 3H), 1.66 (d, *J* = 6.9 Hz, 3H). <sup>13</sup>C NMR (126 MHz, Chloroform-*d*) δ 161.92, 150.32, 144.04, 136.05, 134.58, 127.77, 127.01, 123.58, 122.99, 115.87, 107.89, 20.37, 18.88, 12.32. HRMS(ESI) *m/z*: calculated for [C<sub>16</sub>H<sub>17</sub>NO + H]<sup>+</sup> 240.1388, found 240.1383. IR ν 3024.13, 1590.08, 1590.08, 1325.29, 1253.88, 1096.20, 1051.57, 932.56, 864.13, 813.55, 739.17, 646.94, cm<sup>-1</sup>. HPLC data (Chiralpak AD column, hexane : isopropanol = 85 : 15, 1.0 mL/min), *tr* = 16.2 min (major), *tr* = 9.3 min (minor), *ee* = 98%.

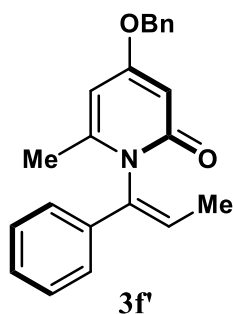

Following the general procedure **C**, **3f'** was obtained as white waxy (14 mg, 40% yield).  $^1\text{H}$  NMR (500 MHz, Chloroform-*d*)  $\delta$  7.44 – 7.35 (m, 5H), 7.32 – 7.28 (m, 4H), 7.24 (d,  $J = 6.9$  Hz, 1H), 6.58 (q,  $J = 6.9$  Hz, 1H), 6.04 (d,  $J = 2.6$  Hz, 1H), 5.94 (d,  $J = 2.5$  Hz, 1H), 5.02 (s, 2H), 2.04 (s, 3H), 1.69 (d,  $J = 6.9$  Hz, 3H).  $^{13}\text{C}$  NMR (126 MHz, Chloroform-*d*)  $\delta$  166.12, 163.41, 145.26, 135.83, 134.75, 134.40, 127.80, 127.72, 127.47, 127.03, 126.83, 123.56, 123.43, 100.16, 94.98, 69.15, 18.96, 12.35. HRMS(ESI)  $m/z$ : calculated for  $[\text{C}_{22}\text{H}_{21}\text{NO}_2 + \text{H}]^+$  332.1651, found 332.1640. IR  $\nu$  1652.56, 1593.06, 1551.40, 1453.22, 1349.09, 1239.01, 1176.53, 1137.85, 1015.87, 816.53, 757.02, 688.60,  $\text{cm}^{-1}$ . HPLC data (Chiralpak AD column, hexane : isopropanol = 80 : 20, 1.0 mL/min),  $t_r = 12.9$  min (major),  $t_r = 10.9$  min (minor), ee = 98%.

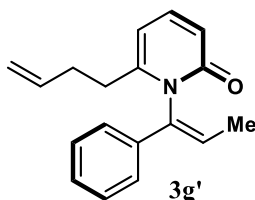

Following the general procedure **C**, **3g'** was obtained as white waxy (20 mg, 75% yield).  $^1\text{H}$  NMR (500 MHz, Chloroform-*d*)  $\delta$  7.43 (ddd,  $J = 9.2, 7.0, 2.2$  Hz, 1H), 7.37 – 7.33 (m, 2H), 7.31 – 7.28 (m, 3H), 6.65 – 6.61 (m, 2H), 6.17 (d,  $J = 6.9$  Hz, 1H), 5.72 (ddt,  $J = 16.8, 10.1, 6.5$  Hz, 1H), 5.02 – 4.96 (m, 2H), 2.53 (dd,  $J = 9.6, 6.3$  Hz, 1H), 2.46 (dd,  $J = 9.2, 6.4$  Hz, 1H), 2.30 – 2.26 (m, 1H), 2.22 – 2.19 (m, 1H), 1.72 (dd,  $J = 7.2, 2.2$  Hz, 3H).  $^{13}\text{C}$  NMR (126 MHz, Chloroform-*d*)  $\delta$  161.84, 148.51, 138.66, 135.67, 135.39, 134.74, 127.83, 127.11, 123.63, 123.54, 117.50, 114.95, 104.11, 30.67, 30.64, 12.62. HRMS(ESI)  $m/z$ : calculated for  $[\text{C}_{18}\text{H}_{19}\text{NO} + \text{H}]^+$  266.1545, found 266.1550. IR  $\nu$  1655.54, 1584.13, 1542.48, 1482.98, 1441.32, 1325.29, 1230.08,

1131.90, 905.79, 798.68, 760.00, 688.60,  $\text{cm}^{-1}$ . HPLC data (Chiralpak AD column, hexane : isopropanol = 85 : 15, 1.0 mL/min),  $t_r = 11.7$  min (major),  $t_r = 7.7$  min (minor), ee = 98%.

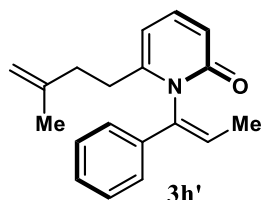

Following the general procedure C, **3h'** was obtained as white waxy (15 mg, 54% yield).  $^1\text{H}$  NMR (500 MHz, Chloroform-*d*)  $\delta$  7.43 (dd,  $J = 9.2, 6.9$  Hz, 1H), 7.36–7.33 (m, 2H), 7.31 – 7.30 (m, 3H), 6.66 – 6.61 (m, 2H), 6.17 (d,  $J = 6.9$  Hz, 1H), 4.74 (t,  $J = 1.6$  Hz, 1H), 4.60 (s, 1H), 2.56 (dd,  $J = 10.1, 5.8$  Hz, 1H), 2.51 (dd,  $J = 10.0, 5.9$  Hz, 1H), 2.22 (ddd,  $J = 15.5, 10.0, 5.9$  Hz, 1H), 2.13 (dd,  $J = 10.0, 5.6$  Hz, 1H), 1.73 (d,  $J = 7.0$  Hz, 3H), 1.65 (s, 3H).  $^{13}\text{C}$  NMR (126 MHz, Chloroform-*d*)  $\delta$  161.85, 148.91, 142.63, 138.72, 135.70, 134.83, 127.83, 127.11, 123.67, 123.60, 117.41, 110.03, 104.05, 34.89, 29.65, 21.27, 12.66. HRMS(ESI)  $m/z$ : calculated for  $[\text{C}_{19}\text{H}_{21}\text{NO} + \text{H}]^+$  280.1701, found 280.1702. IR  $\nu$  1658.51, 1584.13, 1539.50, 1441.32, 1328.26, 1259.83, 884.96, 798.68, 757.02, 688.60,  $\text{cm}^{-1}$ . HPLC data (Chiralpak AD column, hexane : isopropanol = 85 : 15, 1.0 mL/min),  $t_r = 9.9$  min (major),  $t_r = 7.2$  min (minor), ee = 98%.

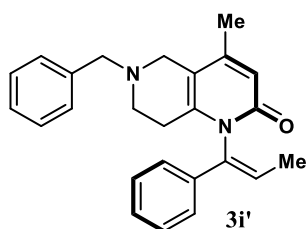

Following the general procedure C, **3i'** was obtained as yellow waxy (16 mg, 43% yield).  $^1\text{H}$  NMR (500 MHz, Chloroform-*d*)  $\delta$  7.37 (d,  $J = 4.4$  Hz, 4H), 7.34 (d,  $J = 8.3$  Hz, 3H), 7.29 (d,  $J = 7.2$  Hz, 3H), 6.60 (q,  $J = 6.9$  Hz, 1H), 6.50 (s, 1H), 3.75 (t,  $J = 9.7$  Hz, 2H), 3.53 – 3.42 (m, 2H), 2.76 – 2.48 (m, 4H), 2.15 (s, 3H), 1.71 (d,  $J = 6.9$  Hz, 3H).  $^{13}\text{C}$  NMR (126 MHz, Chloroform-*d*)  $\delta$  160.75, 148.58, 139.67, 135.46,

134.60, 128.06, 127.79, 127.41, 127.01, 126.43, 123.61, 123.44, 116.98, 94.38, 61.25, 50.85, 47.62, 28.69, 26.31, 17.78, 12.45. HRMS(ESI)  $m/z$ : calculated for  $[C_{25}H_{26}N_2O + H]^+$  371.2123, found 371.2133. IR  $\nu$  1661.49, 1578.18, 1536.53, 1491.90, 1358.02, 1328.26, 1209.26, 1033.72, 962.31, 852.23, 757.02, 697.52,  $cm^{-1}$ . HPLC data (Chiralpak AD column, hexane : isopropanol = 70 : 30, 1.0 mL/min),  $t_r$  = 8.2 min (major),  $t_r$  = 5.9 min (minor), ee = 99%.

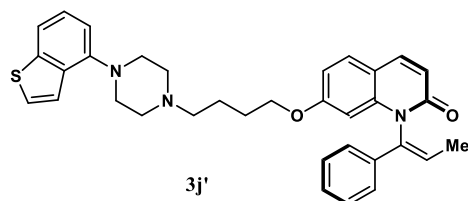

Following the general procedure **C**, **3j'** was obtained as white solid (41 mg, 75% yield) (*Z:E*=10:1), m.p. 55-56 °C.  $^1H$  NMR (500 MHz, Chloroform-*d*)  $\delta$  7.74 (d,  $J$  = 9.5 Hz, 1H), 7.69 – 7.64 (m, 1H), 7.56 (d,  $J$  = 8.1 Hz, 1H), 7.52 – 7.47 (m, 1H), 7.40 (s, 2H), 7.33 – 7.27 (m, 3H), 7.26 – 7.21 (m, 2H), 6.88 (d,  $J$  = 7.7 Hz, 1H), 6.79 (dd,  $J$  = 8.7, 2.3 Hz, 1H), 6.72 – 6.64 (m, 3H), 3.91 (ddt,  $J$  = 27.1, 9.2, 6.1 Hz, 2H), 3.20 (t,  $J$  = 4.9 Hz, 4H), 2.74 (s, 4H), 2.52 (t,  $J$  = 7.5 Hz, 2H), 1.781-1.72 (m, 2H), 1.71 (dd,  $J$  = 10.2, 5.3 Hz, 2H), 1.63 (d,  $J$  = 7.0 Hz, 3H).  $^{13}C$  NMR (126 MHz, Chloroform-*d*)  $\delta$  160.63, 160.40, 147.42, 140.12, 140.00, 138.78, 134.98, 134.54, 133.05, 128.80, 127.78, 127.04, 125.39, 124.43, 124.01, 123.95, 120.86, 117.85, 116.02, 113.58, 111.15, 109.85, 99.11, 66.95, 57.20, 52.55, 51.08, 26.07, 22.37, 12.47. HRMS(ESI)  $m/z$ : calculated for  $[C_{34}H_{35}N_3O_2S + H]^+$  550.2528, found 550.2526. IR  $\nu$  1646.61, 1625.79, 1584.13, 1441.32, 1405.62, 1230.08, 1200.33, 1143.80, 968.26, 837.36, 745.12, 694.55,  $cm^{-1}$ . HPLC data (Chiralpak AD column, hexane : isopropanol = 85 : 15, 1.0 mL/min),  $t_r$  = 29.4 min (major),  $t_r$  = 19.4 min (minor), ee  $\approx$  92%.

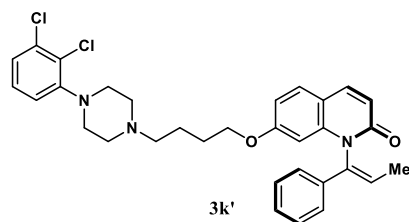



Following the general procedure **C**, **3k'** was obtained as yellow oil (17 mg, 64% yield). <sup>1</sup>H NMR (500 MHz, Chloroform-*d*) δ 7.78 (d, *J* = 9.5 Hz, 1H), 7.54 (d, *J* = 8.6 Hz, 1H), 7.37 – 7.33 (m, 2H), 7.30 (d, *J* = 12.3 Hz, 3H), 7.23 – 7.16 (m, 2H), 7.01 – 6.96 (m, 1H), 6.83 (dd, *J* = 8.7, 2.4 Hz, 1H), 6.75 (d, *J* = 6.9 Hz, 1H), 6.69 (dd, *J* = 5.9, 3.6 Hz, 2H), 4.01 – 3.90 (m, 2H), 3.11 (s, 4H), 2.70 (s, 4H), 2.51 (t, *J* = 7.5 Hz, 2H), 1.81 (d, *J* = 7.3 Hz, 2H), 1.73 (d, *J* = 7.6 Hz, 2H), 1.67 (d, *J* = 7.0 Hz, 3H). <sup>13</sup>C NMR (126 MHz, Chloroform-*d*) δ 160.60, 160.36, 150.22, 139.99, 138.74, 134.97, 134.53, 133.01, 128.78, 127.77, 127.04, 126.44, 125.37, 124.41, 123.94, 123.57, 117.87, 117.55, 113.57, 109.80, 99.09, 66.91, 57.09, 52.25, 50.27, 26.03, 22.33, 12.46. HRMS(ESI) *m/z*: calculated for [C<sub>32</sub>H<sub>33</sub>Cl<sub>2</sub>N<sub>3</sub>O<sub>2</sub> + H]<sup>+</sup> 562.2028, found 562.2027. Isotopic MS, calculated 564.1999, found 564.2001. IR ν 1655.54, 1593.06, 1447.27, 1399.67, 1215.21, 1134.88, 1045.62, 965.29, 831.40, 727.27, 688.60, cm<sup>-1</sup>. HPLC data (Chiralpak AD column, hexane : isopropanol = 70 : 30, 1.0 mL/min), *t<sub>r</sub>* = 10.9 min (major), *t<sub>r</sub>* = 7.3 min (minor), ee = 94%.

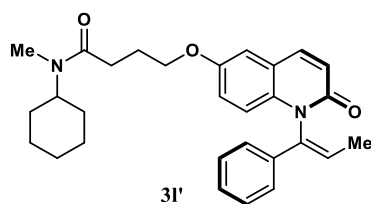

Following the general procedure **C**, **3l'** was obtained as white waxy (22 mg, 48% yield). <sup>1</sup>H NMR (400 MHz, Chloroform-*d*) δ 7.77 (d, *J* = 9.5 Hz, 1H), 7.27 (dd, *J* = 11.0, 3.3 Hz, 5H), 7.13 – 7.02 (m, 3H), 6.84 (d, *J* = 9.5 Hz, 1H), 6.73 (q, *J* = 6.9 Hz, 1H), 4.16 – 4.02 (m, 3H), 2.83 (d, *J* = 6.8 Hz, 3H), 2.53 (dt, *J* = 20.7, 7.0 Hz, 2H), 2.18 – 2.14 (m, 2H), 2.06 (s, 1H), 1.81 (t, *J* = 13.2 Hz, 2H), 1.66 (d, *J* = 13.8 Hz, 2H), 1.61 (d, *J* = 7.0 Hz, 3H), 1.43 – 1.34 (m, 2H), 1.28 (d, *J* = 11.6 Hz, 3H). <sup>13</sup>C NMR (101 MHz, Chloroform-*d*) δ 171.66, 160.84, 154.39, 154.34, 139.56, 135.82, 135.45, 128.77, 128.07, 125.42, 124.86, 122.72, 122.69, 121.19, 119.91, 117.00, 110.93, 56.54, 52.35, 30.90, 30.24, 29.93, 27.23, 25.78, 25.65, 24.73, 13.41. HRMS(ESI) *m/z*: calculated for [C<sub>29</sub>H<sub>34</sub>N<sub>2</sub>O<sub>3</sub> + H]<sup>+</sup> 459.2648, found 459.2648. IR ν 1640.66, 1613.88, 1563.31, 1491.90, 1432.40, 1244.96, 1137.85, 1030.74, 974.21, 819.50, 760.00,

688.60,  $\text{cm}^{-1}$ . HPLC data (Chiralpak OD column, hexane : isopropanol = 80 : 20, 1.0 mL/min),  $t_r = 27.5$  min (major),  $t_r = 24.7$  min (minor), ee = 92%.

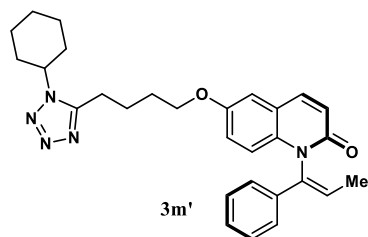

Following the general procedure **C**, **3m'** was obtained as brown waxy (17 mg, 35% yield).  $^1\text{H}$  NMR (500 MHz, Chloroform-*d*)  $\delta$  7.80 (d,  $J = 9.5$  Hz, 1H), 7.32 (d,  $J = 4.9$  Hz, 5H), 7.15 (d,  $J = 9.2$  Hz, 1H), 7.09 (d,  $J = 2.8$  Hz, 1H), 7.03 (dd,  $J = 9.1, 2.8$  Hz, 1H), 6.87 (d,  $J = 9.5$  Hz, 1H), 6.76 (q,  $J = 6.9$  Hz, 1H), 4.19 – 4.13 (m, 1H), 4.10 (t,  $J = 5.9$  Hz, 2H), 2.97 (t,  $J = 7.5$  Hz, 2H), 2.11 – 2.08 (m, 3H), 2.07 – 1.97 (m, 9H), 1.81 (d,  $J = 11.9$  Hz, 2H), 1.65 (d,  $J = 6.9$  Hz, 3H).  $^{13}\text{C}$  NMR (126 MHz, Chloroform-*d*)  $\delta$  153.19, 152.43, 144.70, 138.38, 134.84, 134.46, 132.81, 127.76, 127.06, 124.41, 123.85, 121.88, 120.14, 118.75, 116.02, 109.91, 66.62, 56.61, 31.88, 28.69, 27.48, 24.31, 23.77, 22.94, 21.99, 21.69, 12.39. HRMS(ESI)  $m/z$ : calculated for  $[\text{C}_{29}\text{H}_{33}\text{N}_5\text{O}_2 + \text{H}]^+$  484.2713, found 484.2704. IR  $\nu$  1646.61, 1563.31, 1491.90, 1438.35, 1331.24, 1247.93, 1140.83, 977.19, 807.60, 762.98, 685.62,  $\text{cm}^{-1}$ . HPLC data (Chiralpak AD column, hexane : isopropanol = 70 : 30, 1.0 mL/min),  $t_r = 36.8$  min (major),  $t_r = 16.5$  min (minor), ee = 90%.

#### General procedure D: Large scale experiment

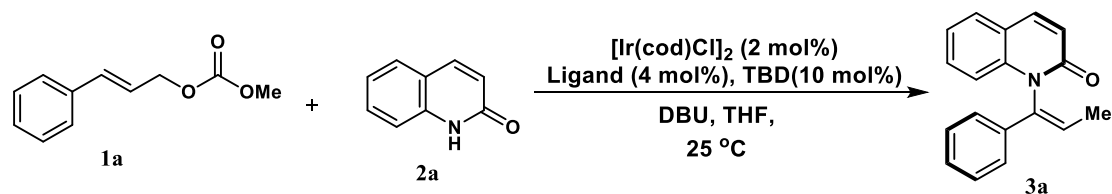

The reaction was carried out in the glovebox under argon atmosphere.  $[\text{Ir}(\text{cod})\text{Cl}]_2$  (14 mg, 0.02 mmol), **L1** (25 mg, 0.04 mmol), and TBD (14 mg, 0.1 mmol) were added to a vial equipped with a magnetic stirring bar. The vial was then charged with THF (5.0 mL) and stirred at 25 °C for 30 min. Pressure pipe was added propenyl carbonate (1.0 mmol), 2-Hydroxyquinoline (2.0 mmol), DBU (3.0 mmol) and THF (5.0 mL). The

pre-formed catalyst solution was then transferred to pressure pipe. The mixture was stirred at 25 °C for 48 h. Upon completion of the reaction, saturated NH<sub>4</sub>Cl aqueous solution was added and the mixture was extracted with DCM (10 mL x 3). The combined organic phase was washed with brine, dried over Na<sub>2</sub>SO<sub>4</sub>, filtered and concentrated in vacuo. The residue was purified by silica gel flash chromatography (PE : EA = 4 : 1) to afford the desired product **3a** as a yellow solid (190 mg, 73% yield, ee = 91%).

### General procedure E: Iridium catalyzed asymmetric allylic amination

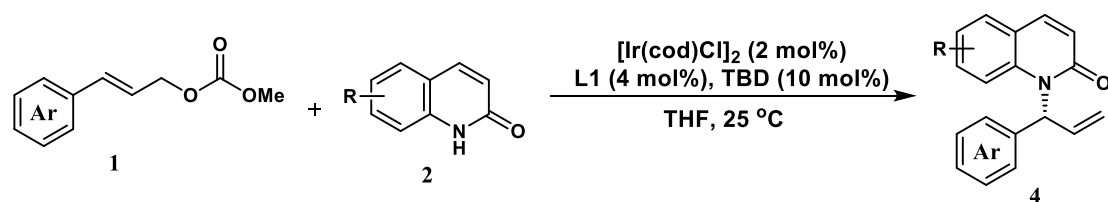

The reactions were proceeded in the glovebox. [Ir(cod)Cl]<sub>2</sub> (1.4 mg, 0.002 mmol, 0.02 eq), **L1** (2.5 mg, 0.004 mmol, 0.04 eq), and TBD (1.4 mg, 0.01 mmol, 0.1 eq) were added to a 2 dram scintillation vial (vial A) equipped with a magnetic stirring bar. The vial was then charged with THF (0.5 mL) and stirred at 25 °C for 30 min, generating an orange solution. To another 2 dram scintillation vial (vial B) was added **1** (0.1 mmol, 1.0 eq), **2** (0.2 mmol, 2.0 eq) and THF (0.5 mL). The pre-formed catalyst solution (vial A) was then transferred to vial B. The vial B was sealed and stirred at rt with stirring for 48 hour. The vial was removed from the glovebox and uncapped. Saturated NH<sub>4</sub>Cl aqueous solution was added and the mixture was extracted with DCM (10 mL x 3), the combined organic phase was washed with brine, dried over Na<sub>2</sub>SO<sub>4</sub>, filtered and concentrated in vacuo. The residue was purified by column chromatography over silica gel (PE : EA = 4 : 1) to afford the desired product. The configuration of the products was assigned according to **4f**.<sup>[1]</sup>

**Table S1** Iridium catalyzed asymmetric allylic amination.<sup>a</sup>

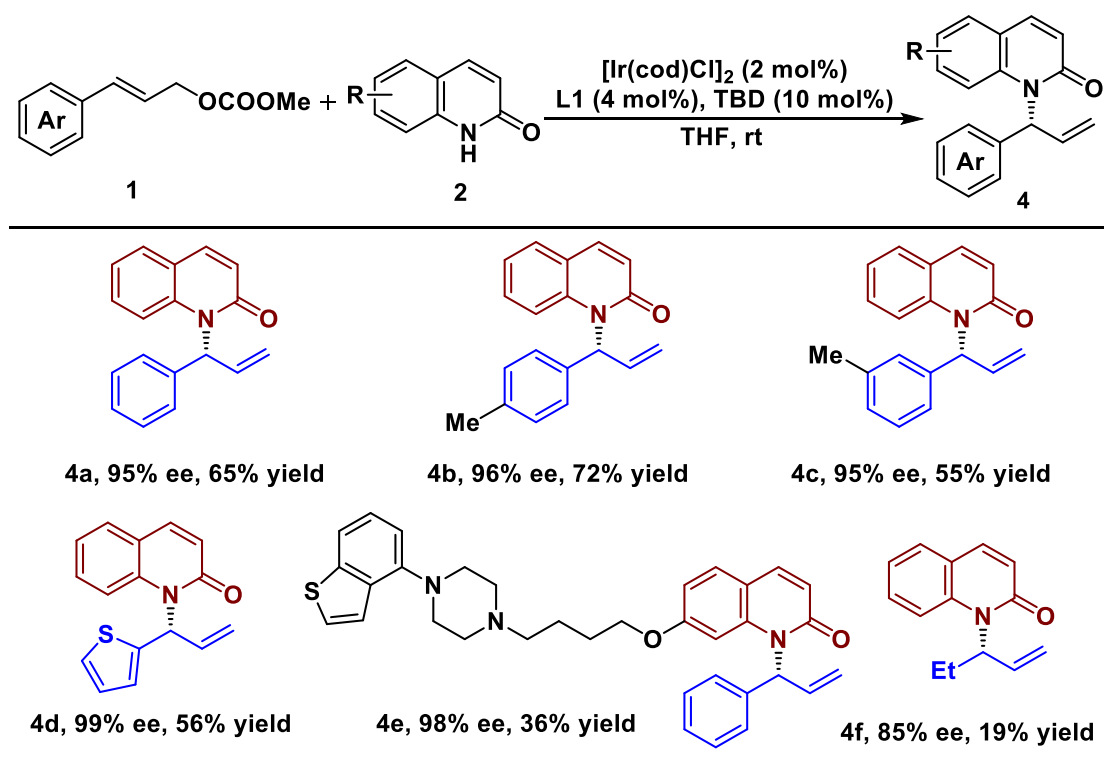

<sup>a</sup> Reaction conditions: all reactions were run on 0.1 mmol scale with respect to 1. ee determined by chiral HPLC. Isolated yield.

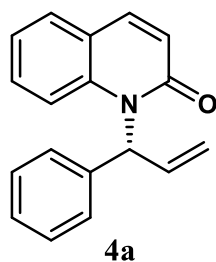

Following the general procedure **E**, **4a** was obtained as yellow oil (17 mg, 65% yield). <sup>1</sup>H NMR (500 MHz, Chloroform-*d*)  $\delta$  7.71 (d,  $J$  = 9.5 Hz, 1H), 7.57 – 7.51 (m, 2H), 7.30 (dd,  $J$  = 8.3, 7.0 Hz, 2H), 7.25 – 7.21 (m, 4H), 7.12 – 7.07 (m, 2H), 6.81 (d,  $J$  = 9.5 Hz, 1H), 6.64 (ddd,  $J$  = 17.0, 10.4, 6.6 Hz, 1H), 5.46 (dt,  $J$  = 10.4, 1.4 Hz, 1H), 5.38 (dt,  $J$  = 17.1, 1.4 Hz, 1H). <sup>13</sup>C NMR (126 MHz, Chloroform-*d*)  $\delta$  161.85, 138.67, 137.78, 132.07, 128.37, 127.90, 127.75, 126.03, 125.01, 120.91, 120.64, 120.36, 119.68, 117.05, 117.02, 56.09. HRMS(ESI)  $m/z$ : calculated for  $[\text{C}_{18}\text{H}_{15}\text{NO} + \text{H}]^+$  262.1232, found 262.1225. IR  $\nu$  1661.49, 1503.80, 1450.25, 1450.25, 1369.92, 789.75,

765.95, 739.17, 688.60,  $\text{cm}^{-1}$ . HPLC data (Chiralpak AD column, hexane : isopropanol = 85 : 15, 1.0 mL/min),  $t_r$  = 8.6 min (major),  $t_r$  = 9.1 min (minor), ee = 95%.

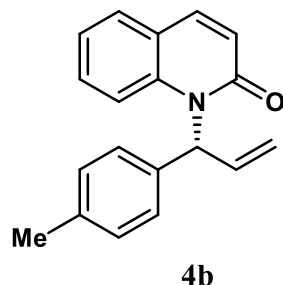

Following the general procedure **E**, **4b** was obtained as yellow oil (20 mg, 72% yield).  $^1\text{H}$  NMR (500 MHz, Chloroform-*d*)  $\delta$  7.70 (d,  $J$  = 9.4 Hz, 1H), 7.52 (td,  $J$  = 7.5, 2.9 Hz, 2H), 7.23 (ddd,  $J$  = 8.6, 7.1, 1.6 Hz, 1H), 7.14 – 7.09 (m, 6H), 6.80 (d,  $J$  = 9.5 Hz, 1H), 6.63 (ddd,  $J$  = 16.9, 10.4, 6.5 Hz, 1H), 5.55 – 5.31 (m, 2H), 2.30 (s, 3H).  $^{13}\text{C}$  NMR (126 MHz, Chloroform-*d*)  $\delta$  161.89, 138.64, 137.01, 135.65, 134.72, 132.25, 128.43, 128.34, 127.86, 124.98, 120.88, 120.64, 120.36, 119.34, 117.07, 55.94, 20.00. HRMS(ESI)  $m/z$ : calculated for  $[\text{C}_{19}\text{H}_{17}\text{NO} + \text{H}]^+$  276.1388, found 276.1380. IR  $\nu$  1643.64, 1572.23, 1447.27, 1301.49, 1224.13, 1120.00, 929.59, 825.45, 742.15,  $\text{cm}^{-1}$ . HPLC data (Chiralpak AD column, hexane : isopropanol = 85 : 15, 1.0 mL/min),  $t_r$  = 9.5 min (major),  $t_r$  = 10.4 min (minor), ee = 96%.

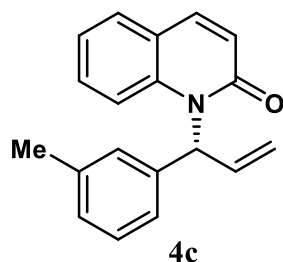

Following the general procedure **E**, **4c** was obtained as yellow oil (15 mg, 55% yield).  $^1\text{H}$  NMR (500 MHz, Chloroform-*d*)  $\delta$  7.72 (d,  $J$  = 9.4 Hz, 1H), 7.52 (dt,  $J$  = 7.5, 3.9 Hz, 2H), 7.25 – 7.17 (m, 2H), 7.13 – 7.10 (m, 2H), 7.05 – 7.02 (m, 3H), 6.81 (d,  $J$  = 9.4 Hz, 1H), 6.64 (ddd,  $J$  = 17.0, 10.4, 6.6 Hz, 1H), 5.46 – 5.35 (m, 2H), 2.29 (s, 3H).  $^{13}\text{C}$  NMR (126 MHz, Chloroform-*d*)  $\delta$  161.87, 138.65, 137.76, 137.45, 137.02, 132.16, 128.38, 127.87, 127.59, 126.83, 125.68, 122.05, 120.88, 120.63, 120.38, 119.54, 117.02, 56.07, 20.56. HRMS(ESI)  $m/z$ : calculated for  $[\text{C}_{19}\text{H}_{17}\text{NO} + \text{H}]^+$

276.1388, found 276.1377. IR  $\nu$  1652.56, 1578.18, 1485.95, 1447.27, 1218.18, 1120.00, 926.61, 825.45, 745.12, 691.57,  $\text{cm}^{-1}$ . HPLC data (Chiralpak AD column, hexane : isopropanol = 90 : 10, 1.0 mL/min),  $t_r$  = 9.6 min (major),  $t_r$  = 9.0 min (minor), ee = 95%.

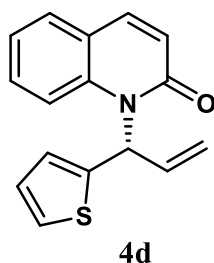

Following the general procedure **E**, **4d** was obtained as yellow oil (15 mg, 56% yield), m.p. 51-52 °C.  $^1\text{H}$  NMR (500 MHz, Chloroform-*d*)  $\delta$  7.70 (d,  $J$  = 9.4 Hz, 2H), 7.53 (d,  $J$  = 7.7 Hz, 1H), 7.31 (d,  $J$  = 5.4 Hz, 2H), 7.20 (d,  $J$  = 5.0 Hz, 1H), 7.14 (ddd,  $J$  = 8.0, 5.8, 2.3 Hz, 1H), 6.95 – 6.92 (m, 2H), 6.77 (d,  $J$  = 9.4 Hz, 1H), 6.61 (ddd,  $J$  = 16.5, 10.4, 5.4 Hz, 1H), 5.42 (dd,  $J$  = 10.4, 1.8 Hz, 1H), 5.33 (dd,  $J$  = 17.1, 1.8 Hz, 1H).  $^{13}\text{C}$  NMR (126 MHz, Chloroform-*d*)  $\delta$  161.41, 141.81, 138.90, 136.79, 132.52, 128.43, 127.96, 126.05, 123.81, 123.78, 121.11, 120.64, 120.16, 118.58, 116.79, 52.92. HRMS(ESI)  $m/z$ : calculated for  $[\text{C}_{16}\text{H}_{13}\text{NOS} + \text{H}]^+$  268.0796, found 268.0785. IR  $\nu$  1637.69, 1584.13, 1444.30, 1399.67, 1227.11, 1137.85, 926.61, 837.36, 748.10, 697.52, 581.49,  $\text{cm}^{-1}$ . HPLC data (Chiralpak AD column, hexane : isopropanol = 95 : 5, 1.0 mL/min),  $t_r$  = 19.8 min (major),  $t_r$  = 21.0 min (minor), ee > 99%.

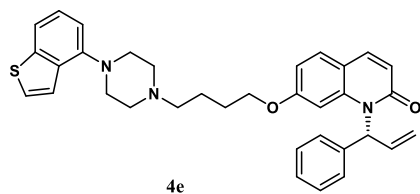

Following the general procedure **E**, **4e** was obtained as white solid (20 mg, 36% yield), m.p. 178-179 °C.  $^1\text{H}$  NMR (500 MHz, Chloroform-*d*)  $\delta$  7.63 (t,  $J$  = 8.5 Hz, 2H), 7.56 (d,  $J$  = 8.1 Hz, 1H), 7.42 – 7.38 (m, 3H), 7.34 – 7.22 (m, 6H), 6.90 (d,  $J$  = 7.6 Hz, 1H), 6.70 – 6.60 (m, 3H), 6.52 (d,  $J$  = 2.3 Hz, 1H), 5.48 (d,  $J$  = 10.4 Hz, 1H), 5.38 (d,  $J$  = 17.1 Hz, 1H), 3.78 – 3.76 (m, 1H), 3.54 – 3.52 (m, 1H), 3.21 (s, 4H), 2.72 – 2.71 (m, 4H), 2.47 (t,  $J$  = 7.2 Hz, 2H), 1.66 (dq,  $J$  = 12.3, 6.3 Hz, 4H).  $^{13}\text{C}$  NMR (126 MHz, Chloroform-*d*)  $\delta$  162.25, 158.83, 140.12, 138.55, 138.50, 138.03, 133.02, 131.49,

128.94, 127.81, 126.08, 125.13, 124.09, 124.01, 120.72, 119.52, 117.02, 116.18, 114.55, 111.25, 110.39, 101.33, 66.72, 57.09, 52.47, 29.18, 28.71, 25.82, 21.70, 13.14. HRMS(ESI)  $m/z$ : calculated for  $[C_{34}H_{35}N_3O_2S + H]^+$  550.2528, found 550.2524. IR  $\nu$  1625.79, 1536.53, 1456.20, 1369.92, 1334.21, 1259.83, 1122.98, 1122.98, 974.21, 837.36, 664.79,  $cm^{-1}$ . HPLC data (Chiralpak AD column, hexane : isopropanol = 85 : 15, 1.0 mL/min),  $t_r$  = 24.0 min (major),  $t_r$  = 22.7 min (minor), ee = 98%.

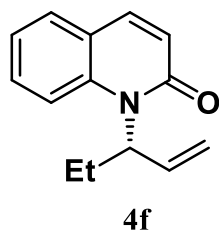

Following the general procedure **E**, **4f** was obtained as white oil (4 mg, 19% yield). HPLC data (Chiralpak OD column, hexane : isopropanol = 99 : 1, 1.0 mL/min),  $t_r$  = 25.1 min (major),  $t_r$  = 29.0 min (minor), ee = 85%.

#### General procedure of isomerization of **4a**

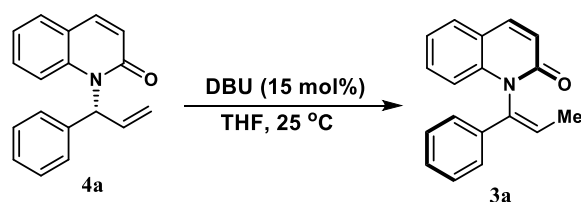

A vial was charged with **4a** (26.1 mg, 0.1 mmol), DBU (15 mol%) and THF (1.0 mL). The reaction mixture was stirred at room temperature for 6 hours. After the reaction complete, the residue was purified by silica gel flash chromatography (PE : EA = 4 : 1) to afford the desired product as a white solid (full conversion, 95% ee). This result indicated the isomerization of the **4a** was attributed to the base of DBU.

#### Deuterium-labeling experiment

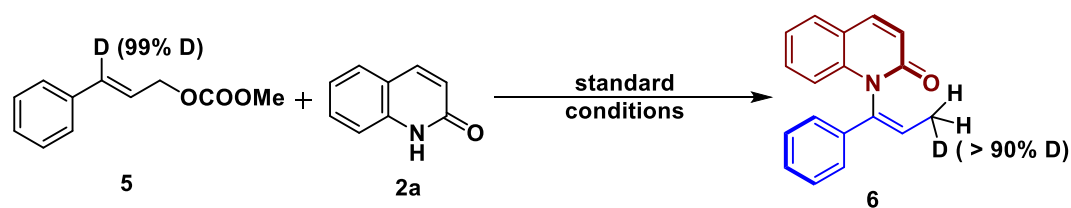

The substrates **6** was synthesized according to literature <sup>[2]</sup>, the general procedure **C** was used to synthesize **6**.

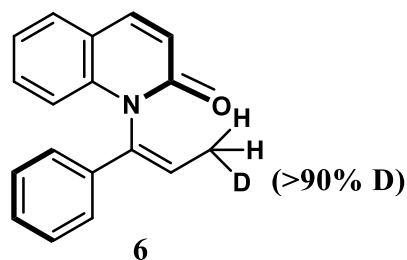

Following the general procedure C, **6** was obtained as yellow solid (23 mg, 88% yield). <sup>1</sup>H NMR (500 MHz, Chloroform-*d*) δ 7.82 (d, *J* = 9.6 Hz, 1H), 7.61 (d, *J* = 7.7 Hz, 1H), 7.40 (q, *J* = 9.0, 7.8 Hz, 1H), 7.29 (dq, *J* = 10.1, 4.9, 3.3 Hz, 4H), 7.24 – 7.18 (m, 3H), 6.82 (d, *J* = 9.5 Hz, 1H), 6.72 (t, *J* = 6.9 Hz, 1H), 1.59 (dt, *J* = 7.3, 2.2 Hz, 2.1H).

### General procedure F: Chiral transfer for epoxidation

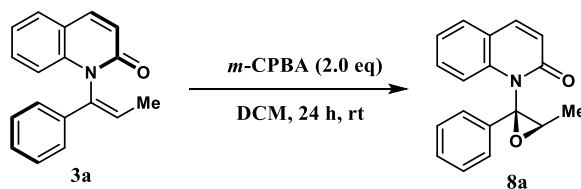

Under an argon atmosphere, a vial was charged with **3a** (26 mg, 0.1 mmol), *m*-CPBA (34 mg, 0.2 mmol) and DCM (1.0 mL). The mixture is stirred for 24 hours at 25 °C, and then quenched by addition of saturated NH<sub>4</sub>Cl aqueous. The layers were separated and the aqueous phase was extracted with DCM (10 mL x 3). The combined organic layers were dried over Na<sub>2</sub>SO<sub>4</sub>, filtered and concentrated in vacuo. The crude product was purified by column chromatography over silica gel (PE: EA = 4 : 1) to afford the desired product.

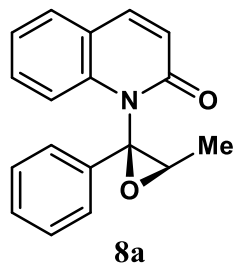

Following the general procedure F, **8a** was obtained as pale yellow waxy (19 mg, 69% yield). <sup>1</sup>H NMR (400 MHz, Chloroform-*d*) δ 7.75 (d, *J* = 9.5 Hz, 1H), 7.63 (d, *J* = 7.8 Hz, 1H), 7.48 (t, *J* = 7.9 Hz, 1H), 7.34 (q, *J* = 7.0, 5.3 Hz, 4H), 7.30-7.23 (m, 3H), 6.74 (d, *J* = 9.6 Hz, 1H), 3.69 (q, *J* = 5.3 Hz, 1H), 1.20 (d, *J* = 5.2 Hz, 3H). <sup>13</sup>C



NMR (101 MHz, Chloroform-*d*)  $\delta$  162.32, 139.69, 139.30, 135.93, 130.20, 128.85, 128.82, 128.70, 125.72, 123.42, 122.87, 120.00, 115.31, 70.98, 64.74, 16.05. HRMS(ESI) *m/z*: calculated for [C<sub>18</sub>H<sub>15</sub>NO<sub>2</sub> + H]<sup>+</sup> 278.1181, found 278.1168. IR  $\nu$  1652.56, 1590.08, 1459.17, 1244.96, 1134.88, 965.29, 822.48, 745.12, 697.52, 632.07, cm<sup>-1</sup>. HPLC data (Chiralpak AD column, hexane : isopropanol = 85 : 15, 1.0 mL/min), *tr* = 15.9 min (major), *tr* = 13.7 min (minor), ee = 90%.

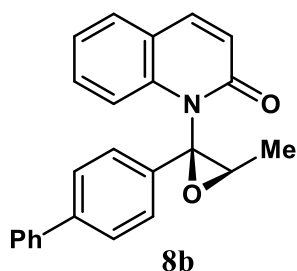

Following the general procedure **F**, **8b** was obtained as white solid (27 mg, 76% yield), m.p.138-139 °C. <sup>1</sup>H NMR (500 MHz, Chloroform-*d*)  $\delta$  7.81 (d, *J* = 9.6 Hz, 1H), 7.68 (dd, *J* = 7.8, 1.5 Hz, 1H), 7.61 – 7.58 (m, 4H), 7.56 – 7.54 (m, 1H), 7.47 (t, *J* = 7.8 Hz, 2H), 7.44 – 7.39 (m, 2H), 7.36 (dd, *J* = 8.5, 2.0 Hz, 3H), 7.32 (d, *J* = 7.7 Hz, 1H), 6.80 (d, *J* = 9.5 Hz, 1H), 3.77 (q, *J* = 5.2 Hz, 1H), 1.26 (d, *J* = 5.3 Hz, 3H). <sup>13</sup>C NMR (126 MHz, Chloroform-*d*)  $\delta$  161.32, 140.83, 139.46, 138.69, 138.28, 133.94, 129.22, 127.79, 127.72, 127.58, 126.65, 126.58, 126.51, 126.11, 125.18, 122.45, 121.88, 119.01, 114.28, 69.91, 63.76, 15.06. HRMS(ESI) *m/z*: calculated for [C<sub>24</sub>H<sub>19</sub>NO<sub>2</sub> + H]<sup>+</sup> 354.1494, found 354.1495. IR  $\nu$  1664.46, 1584.13, 1485.95, 1444.30, 1128.93, 992.07, 837.36, 754.05, 697.52, 620.17, cm<sup>-1</sup>. HPLC data (Chiralpak AD column, hexane : isopropanol = 85 : 15, 1.0 mL/min), *tr* = 30.9 min (major), *tr* = 25.9 min (minor), ee = 94%.

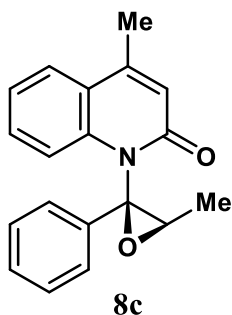

Following the general procedure **F**, **8c** was obtained as white solid (19 mg, 66% yield), m.p.120-121 °C. <sup>1</sup>H NMR (500 MHz, Chloroform-*d*)  $\delta$  7.75 (dd, *J* = 8.1, 1.4 Hz, 1H),

7.46 (ddd,  $J = 8.6, 7.2, 1.5$  Hz, 1H), 7.33 – 7.26 (m, 5H), 7.21 (dd,  $J = 6.8, 3.0$  Hz, 2H), 6.63 (s, 1H), 3.66 (q,  $J = 5.3$  Hz, 1H), 2.50 (d,  $J = 1.1$  Hz, 3H), 1.17 (d,  $J = 5.3$  Hz, 3H).  $^{13}\text{C}$  NMR (126 MHz, Chloroform-*d*)  $\delta$  161.13, 146.32, 137.96, 135.08, 129.00, 127.80, 127.75, 124.74, 124.20, 121.67, 121.54, 119.79, 114.54, 69.84, 63.68, 18.14, 15.03. HRMS(ESI)  $m/z$ : calculated for  $[\text{C}_{19}\text{H}_{17}\text{NO}_2 + \text{H}]^+$  292.1338, found 292.1329. IR  $\nu$  1667.44, 1596.03, 1494.88, 1447.27, 1313.39, 1084.30, 893.88, 795.70, 748.10, 694.55, 649.92,  $\text{cm}^{-1}$ . HPLC data (Chiralpak AD column, hexane : isopropanol = 85 : 15, 1.0 mL/min),  $t_r = 19.3$  min (major),  $t_r = 16.4$  min (minor), ee = 92%.

### Enantiomerization barrier determination for 3a

The enantiomerisation barrier, corresponding to barrier to rotation for 3a atropisomers, was obtained by kinetic of racemization of an enantiomer. The slope of the first-order kinetic line gives the racemization constant ( $k_{\text{racemization}} = 2 * k_{\text{enantiomerisation}}$ ). Eyring equation gives the enantiomerisation barrier from enantiomerisation constant ( $k_{\text{enantiomerisation}}$ ),  $R = 8.31451 \text{ J.K}^{-1}.\text{mol}^{-1}$ ,  $h = 6.62608 * 10^{-34} \text{ J.s}$  and  $k_B = 1.38066 * 10^{-23} \text{ J.K}^{-1}$ .

A .solvent: THF

Temperature = 25 °C

| Time (hour) | % first eluted enantiomer (%t) | $\ln((\%t-50)/(\%t_0-50))$ |
|-------------|--------------------------------|----------------------------|
| 0           | 91.70                          | 0                          |
| 2           | 91.58                          | -0.00288184637488890       |
| 5           | 91.14                          | -0.01352024457994465       |
| 8           | 90.94                          | -0.01839354857161229       |
| 13          | 90.32                          | -0.03365350504164259       |
| 23          | 89.78                          | -0.04713685537892962       |
| 29          | 87.48                          | -0.10669367143453433       |
| 35          | 87.12                          | -0.11634522088675598       |
| 47          | 85.68                          | -0.15591082109294196       |
| 59          | 84.34                          | -0.19419027333542629       |

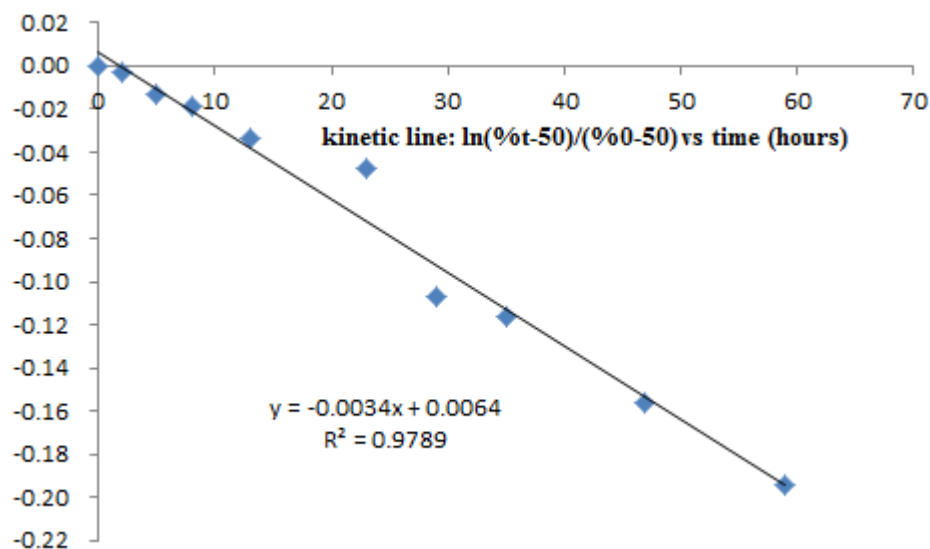

$$K_{\text{racemization}} = 9.4444386 \times 10^{-7} \text{ s}^{-1}$$

$$K_{\text{enantiomerization}} = 4.7222193 \times 10^{-7} \text{ s}^{-1}$$

$$\text{Half-life time } t_{1/2} = 733921 \text{ seconds}$$

$$= 12232.01 \text{ mins}$$

$$= 203.9 \text{ hours}$$

$$= 8.5 \text{ days}$$

Ps: It is worthy to note that **3a** could be stored as solid at room temperature for at least one month with < 1% ee loss; and in freezer for several months without loss in its enantioselectivity.

### DFT results

All density functional theory (DFT) calculations were performed using the Gaussian 16<sup>[3]</sup> software package on Pitt CRC and XSEDE<sup>[4]</sup> supercomputers. Geometries were optimized in tetrahydrofuran (THF) with the SMD solvation model<sup>[5]</sup> using the M06-2X<sup>[6]</sup> functional and a standard basis set of 6-31G(d). Vibrational frequency calculations were performed for all the stationary points to confirm if each optimized structure is a local minimum or a transition state structure. Single point energies were calculated using M06-2X and 6-311++G(d,p) basis set in THF using the SMD solvation model.

Intrinsic reaction coordinate (IRC) calculations have demonstrated that the transition state connects two corresponding intermediates along the reaction

coordinate. Born–Oppenheimer molecular dynamics (BOMD) simulation on the DBU mediated deprotonation step (**TS-1a** and **TS-1b**) were also performed at the M06-2X/6-31G(d)–SMD(THF) level of theory to gain more insights. BOMD simulation results suggested that the cleavage of benzylic C–H bond and the formation of N–H bond occurred simultaneously along the reaction coordinate. When the **TS-1a** is used as the input structure of BOMD simulation, the interaction of carbonyl oxygen atom with benzylic hydrogen atom is observed during DBU mediated deprotonation. The corresponding O–H distance decreased from 2.48 Å to 1.84 Å in 50 fs. Therefore, the BOMD simulation confirmed that the ion-pair intermediate **7a** is directly generated from the deprotonation transition state **TS-1a**.

The NCIPLOT 3.0<sup>[7]</sup> developed by Yang and co-workers was used to visualize the non-covalent interaction in the ion-pair intermediates **7a** and **7b**. As shown in Figure S1, a critical hydrogen bonding interaction could be observed in **7a**. While in **7b**, the corresponding interaction is not observed because the carbonyl oxygen atom is in *trans* position with respect to the N–H bond. Therefore, the chiral ion-pair intermediate **7a** is not only stabilized by the electrostatic attraction but the hydrogen bonding interaction. This hydrogen bonding interaction is also crucial for the stereoretention during central-to-axial chiral transfer because it could fix the relative position of DBU-H cation.

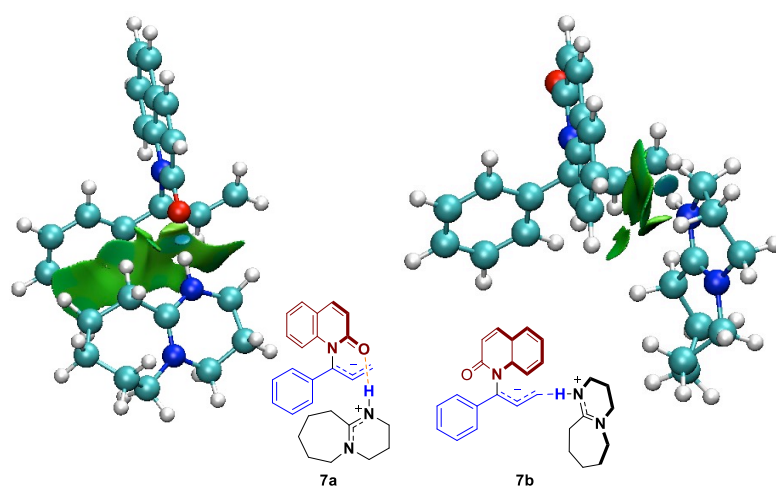

**Figure S1.** Non-covalent interaction (NCI) plot of chiral ion-pair intermediates **7a** and **7b**.

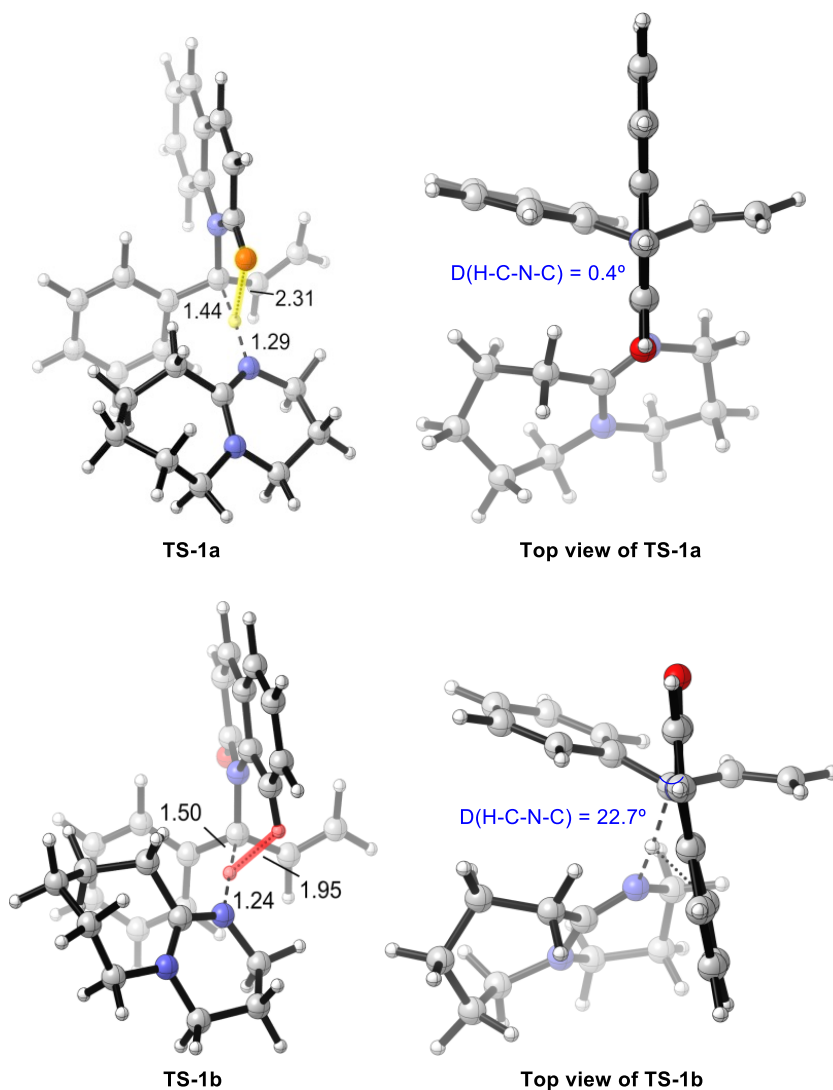

**Figure S2.** Top view of DBU mediated deprotonation transition states **TS-1a** and **TS-1b**.

Optimized structure of DBU mediated deprotonation transition state **TS-1b** shows that the distance between benzylic hydrogen atom and phenyl hydrogen atom is 1.95 Å (Figure S2), which indicates a remarkable steric repulsion. The steric repulsion is also reflected in the comparison of dihedral angles of H–C–N–C. As shown in the top view of **TS-1a**, the dihedral angle of H–C–N–C is  $0.4^\circ$  while the corresponding value in **TS-1b** is  $22.7^\circ$ . This difference further demonstrates the steric repulsion in transition state **TS-1b**. Therefore, the deprotonation prefers to occur through transition state **TS-1a**.

The dissociation of chiral ion-pair intermediates **7a** and **7b** are shown in Figure S3. Computational results suggest that the dissociation of **7a** is disfavored as it requires an

energy increase of 9.1 kcal/mol, which is in accordance with Paton's study.<sup>[8]</sup> The dissociation of **7b** is only endergonic by 3.5 kcal/mol because **7b** is less stable than **7a** by 5.3 kcal/mol.<sup>[8]</sup>

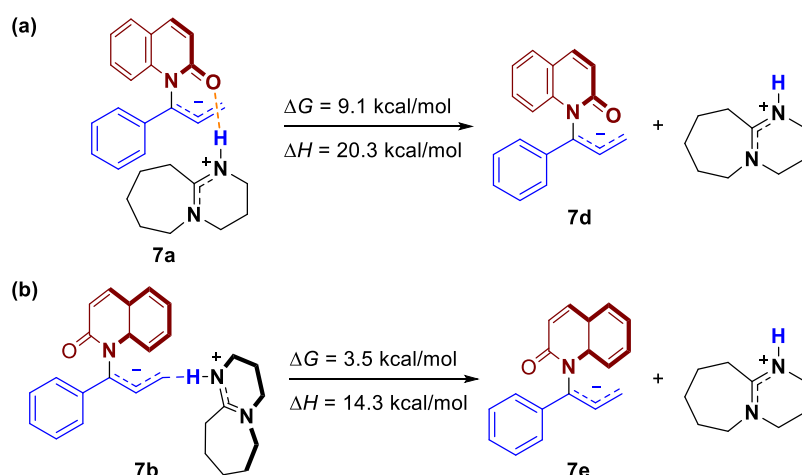

**Figure S3.** The dissociation of chiral ion-pair intermediates **7a** (a) and **7b** (b).

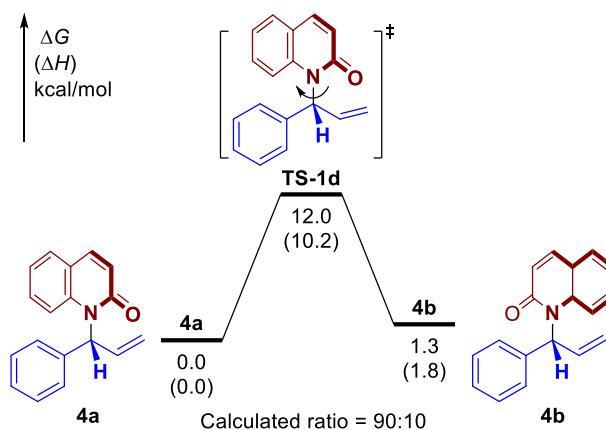

**Figure S4.** The isomerization between **4a** and **4b**.

The isomerization between **4a** and **4b** could occur through the rotation along the C–N bond. A transition state **TS-1d** was located for this process. As shown in Figure S4, the activation free energy is only 12.0 kcal/mol, which suggests the isomerization is a facile process. Meanwhile, computational results show that **4b** is less stable than **4a** by 1.3 kcal/mol, which corresponds to a ratio of 90:10.

### Cartesian coordinates (Å) and energies of optimized structures

#### (*P*)-**3a**

M06-2X/6-31G(d) SCF energy in solution: -824.59835943 a.u.  
 M06-2X/6-31G(d) enthalpy in solution: -824.295431 a.u.  
 M06-2X/6-31G(d) free energy in solution: -824.356975 a.u.  
 M06-2X/6-311+G(d,p) SCF energy in solution: -824.82531889 a.u.  
 M06-2X/6-311+G(d,p) enthalpy in solution: -824.522390 a.u.  
 M06-2X/6-311+G(d,p) free energy in solution: -824.583934 a.u.

Cartesian coordinates

| ATOM | X         | Y         | Z         |
|------|-----------|-----------|-----------|
| C    | 1.471442  | -2.515263 | 1.416745  |
| C    | 0.756887  | -1.352922 | 1.177423  |
| C    | 1.241173  | -0.410860 | 0.253412  |
| C    | 2.463790  | -0.656486 | -0.406063 |
| C    | 3.167783  | -1.842902 | -0.142561 |
| C    | 2.680347  | -2.772362 | 0.756907  |
| H    | 1.083097  | -3.232995 | 2.132725  |
| H    | -0.170070 | -1.168889 | 1.707663  |
| C    | 2.959327  | 0.336021  | -1.325033 |
| H    | 4.107848  | -2.010986 | -0.661257 |
| H    | 3.228703  | -3.687082 | 0.955262  |
| C    | 2.280387  | 1.477528  | -1.545001 |
| C    | 1.006365  | 1.763433  | -0.886435 |
| H    | 3.900997  | 0.142210  | -1.832834 |
| H    | 2.633521  | 2.242691  | -2.226847 |
| O    | 0.367289  | 2.787377  | -1.081375 |
| N    | 0.543181  | 0.769070  | -0.011136 |
| C    | -0.752974 | 0.964766  | 0.584722  |
| C    | -0.918366 | 1.902274  | 1.523144  |
| H    | -1.928185 | 2.073776  | 1.888969  |
| C    | 0.156778  | 2.782090  | 2.070566  |

|   |           |           |           |
|---|-----------|-----------|-----------|
| H | 1.154950  | 2.398693  | 1.844033  |
| H | 0.055551  | 2.882626  | 3.155905  |
| C | -1.843156 | 0.116405  | 0.042396  |
| C | -2.966513 | -0.198251 | 0.819383  |
| C | -1.765839 | -0.387469 | -1.261737 |
| C | -3.997465 | -0.969949 | 0.294259  |
| C | -2.797528 | -1.162686 | -1.784498 |
| H | -0.895955 | -0.165847 | -1.873908 |
| C | -3.918793 | -1.453950 | -1.011122 |
| H | -2.723049 | -1.539128 | -2.800225 |
| H | -4.721154 | -2.061702 | -1.417831 |
| H | -3.023812 | 0.146823  | 1.847743  |
| H | -4.859038 | -1.205748 | 0.911654  |
| H | 0.074153  | 3.786550  | 1.638855  |

**(M)-3a**

|                                              |                    |
|----------------------------------------------|--------------------|
| M06-2X/6-31G(d) SCF energy in solution:      | -824.59835943 a.u. |
| M06-2X/6-31G(d) enthalpy in solution:        | -824.295431 a.u.   |
| M06-2X/6-31G(d) free energy in solution:     | -824.356975 a.u.   |
| M06-2X/6-311+G(d,p) SCF energy in solution:  | -824.82531889 a.u. |
| M06-2X/6-311+G(d,p) enthalpy in solution:    | -824.522390 a.u.   |
| M06-2X/6-311+G(d,p) free energy in solution: | -824.583934 a.u.   |

Cartesian coordinates

| ATOM | X        | Y         | Z         |
|------|----------|-----------|-----------|
| C    | 1.471442 | -2.515263 | -1.416745 |
| C    | 0.756887 | -1.352922 | -1.177423 |
| C    | 1.241173 | -0.410860 | -0.253412 |
| C    | 2.463790 | -0.656486 | 0.406063  |
| C    | 3.167783 | -1.842902 | 0.142561  |
| C    | 2.680347 | -2.772362 | -0.756907 |



|   |           |           |           |
|---|-----------|-----------|-----------|
| H | 1.083097  | -3.232995 | -2.132725 |
| H | -0.170070 | -1.168889 | -1.707663 |
| C | 2.959327  | 0.336021  | 1.325033  |
| H | 4.107848  | -2.010986 | 0.661257  |
| H | 3.228703  | -3.687082 | -0.955262 |
| C | 2.280387  | 1.477528  | 1.545001  |
| C | 1.006365  | 1.763433  | 0.886435  |
| H | 3.900997  | 0.142210  | 1.832834  |
| H | 2.633521  | 2.242691  | 2.226847  |
| O | 0.367289  | 2.787377  | 1.081375  |
| N | 0.543181  | 0.769070  | 0.011136  |
| C | -0.752974 | 0.964766  | -0.584722 |
| C | -0.918366 | 1.902274  | -1.523144 |
| H | -1.928185 | 2.073776  | -1.888969 |
| C | 0.156778  | 2.782090  | -2.070566 |
| H | 1.154950  | 2.398693  | -1.844033 |
| H | 0.055551  | 2.882626  | -3.155905 |
| C | -1.843156 | 0.116405  | -0.042396 |
| C | -2.966513 | -0.198251 | -0.819383 |
| C | -1.765839 | -0.387469 | 1.261737  |
| C | -3.997465 | -0.969949 | -0.294259 |
| C | -2.797528 | -1.162686 | 1.784498  |
| H | -0.895955 | -0.165847 | 1.873908  |
| C | -3.918793 | -1.453950 | 1.011122  |
| H | -2.723049 | -1.539128 | 2.800225  |
| H | -4.721154 | -2.061702 | 1.417831  |
| H | -3.023812 | 0.146823  | -1.847743 |
| H | -4.859038 | -1.205748 | -0.911654 |
| H | 0.074153  | 3.786550  | -1.638855 |

**3c**

|                                              |                    |
|----------------------------------------------|--------------------|
| M06-2X/6-31G(d) SCF energy in solution:      | -824.59463941 a.u. |
| M06-2X/6-31G(d) enthalpy in solution:        | -824.291787 a.u.   |
| M06-2X/6-31G(d) free energy in solution:     | -824.353094 a.u.   |
| M06-2X/6-311+G(d,p) SCF energy in solution:  | -824.82129409 a.u. |
| M06-2X/6-311+G(d,p) enthalpy in solution:    | -824.518442 a.u.   |
| M06-2X/6-311+G(d,p) free energy in solution: | -824.579749 a.u.   |

## Cartesian coordinates

| ATOM | X         | Y         | Z         |
|------|-----------|-----------|-----------|
| C    | -2.008014 | -2.555275 | -0.843370 |
| C    | -1.107518 | -1.502820 | -0.843444 |
| C    | -1.453506 | -0.284769 | -0.232783 |
| C    | -2.725476 | -0.148152 | 0.363436  |
| C    | -3.619735 | -1.231166 | 0.344322  |
| C    | -3.270856 | -2.429584 | -0.249470 |
| H    | -1.724088 | -3.490223 | -1.316619 |
| H    | -0.139332 | -1.618803 | -1.315620 |
| C    | -3.067096 | 1.113319  | 0.969051  |
| H    | -4.594457 | -1.103746 | 0.807477  |
| H    | -3.965780 | -3.262521 | -0.258946 |
| C    | -2.192386 | 2.137047  | 0.979325  |
| C    | -0.856289 | 2.019298  | 0.398040  |
| H    | -4.051152 | 1.218308  | 1.419204  |
| H    | -2.421719 | 3.094757  | 1.432550  |
| O    | -0.021547 | 2.913888  | 0.443920  |
| N    | -0.569824 | 0.793676  | -0.213139 |
| C    | 0.742199  | 0.640231  | -0.804534 |
| C    | 0.926239  | 1.107038  | -2.043203 |

|   |          |           |           |
|---|----------|-----------|-----------|
| H | 0.055170 | 1.541101  | -2.531327 |
| C | 2.209098 | 1.147335  | -2.813689 |
| H | 3.081984 | 0.989346  | -2.176589 |
| H | 2.309311 | 2.119692  | -3.306575 |
| C | 1.749959 | -0.030252 | 0.053804  |
| C | 2.624594 | -0.987351 | -0.475857 |
| C | 1.818030 | 0.264313  | 1.421825  |
| C | 3.561593 | -1.618604 | 0.338351  |
| C | 2.754980 | -0.366815 | 2.233571  |
| H | 1.146106 | 1.005359  | 1.844227  |
| C | 3.631034 | -1.308364 | 1.694612  |
| H | 2.801995 | -0.122140 | 3.290387  |
| H | 4.359337 | -1.802272 | 2.330540  |
| H | 2.554652 | -1.253911 | -1.526908 |
| H | 4.229447 | -2.361841 | -0.086460 |
| H | 2.218563 | 0.387484  | -3.604656 |

#### 4a

|                                              |                    |
|----------------------------------------------|--------------------|
| M06-2X/6-31G(d) SCF energy in solution:      | -824.58312417 a.u. |
| M06-2X/6-31G(d) enthalpy in solution:        | -824.279625 a.u.   |
| M06-2X/6-31G(d) free energy in solution:     | -824.340707 a.u.   |
| M06-2X/6-311+G(d,p) SCF energy in solution:  | -824.81130006 a.u. |
| M06-2X/6-311+G(d,p) enthalpy in solution:    | -824.507801 a.u.   |
| M06-2X/6-311+G(d,p) free energy in solution: | -824.568883 a.u.   |

#### Cartesian coordinates

| ATOM | X        | Y         | Z        |
|------|----------|-----------|----------|
| C    | 1.221571 | -2.531756 | 1.292594 |
| C    | 0.574871 | -1.347145 | 0.980830 |
| C    | 1.231557 | -0.354905 | 0.227044 |

|   |           |           |           |
|---|-----------|-----------|-----------|
| C | 2.554850  | -0.603711 | -0.203428 |
| C | 3.185629  | -1.814909 | 0.125954  |
| C | 2.533050  | -2.778693 | 0.869261  |
| H | 0.690671  | -3.278502 | 1.874890  |
| H | -0.443098 | -1.205249 | 1.317375  |
| C | 3.233300  | 0.403032  | -0.975716 |
| H | 4.203597  | -1.973424 | -0.219687 |
| H | 3.026237  | -3.711534 | 1.120673  |
| C | 2.625333  | 1.563943  | -1.278537 |
| C | 1.265600  | 1.859064  | -0.838867 |
| H | 4.249693  | 0.202695  | -1.305276 |
| H | 3.108034  | 2.345137  | -1.854200 |
| O | 0.712940  | 2.924632  | -1.092720 |
| N | 0.616774  | 0.852971  | -0.110505 |
| C | -0.747940 | 1.183544  | 0.352549  |
| H | -0.956936 | 2.138578  | -0.134327 |
| C | -0.761719 | 1.442528  | 1.840904  |
| H | -0.503949 | 0.620277  | 2.505666  |
| C | -1.063906 | 2.634554  | 2.347319  |
| H | -1.321914 | 3.475235  | 1.706867  |
| H | -1.062663 | 2.812688  | 3.418928  |
| C | -1.794338 | 0.195403  | -0.150790 |
| C | -2.963489 | -0.029191 | 0.578719  |
| C | -1.631712 | -0.443966 | -1.383249 |
| C | -3.950140 | -0.884046 | 0.088782  |
| C | -2.616849 | -1.297165 | -1.872035 |
| H | -0.726774 | -0.276621 | -1.961490 |
| C | -3.779699 | -1.522639 | -1.136417 |
| H | -2.474253 | -1.788641 | -2.829825 |
| H | -4.546249 | -2.190731 | -1.516829 |

|   |           |           |          |
|---|-----------|-----------|----------|
| H | -3.106560 | 0.468624  | 1.533495 |
| H | -4.852594 | -1.050034 | 0.669537 |

#### 4b

|                                              |                    |
|----------------------------------------------|--------------------|
| M06-2X/6-31G(d) SCF energy in solution:      | -824.57982783 a.u. |
| M06-2X/6-31G(d) enthalpy in solution:        | -824.276474 a.u.   |
| M06-2X/6-31G(d) free energy in solution:     | -824.338389 a.u.   |
| M06-2X/6-311+G(d,p) SCF energy in solution:  | -824.80824139 a.u. |
| M06-2X/6-311+G(d,p) enthalpy in solution:    | -824.504888 a.u.   |
| M06-2X/6-311+G(d,p) free energy in solution: | -824.566803 a.u.   |

#### Cartesian coordinates

| ATOM | X         | Y         | Z         |
|------|-----------|-----------|-----------|
| C    | 2.411197  | -2.236816 | -1.306848 |
| C    | 1.351784  | -1.368199 | -1.097199 |
| C    | 1.508752  | -0.247600 | -0.259139 |
| C    | 2.746566  | -0.066037 | 0.400167  |
| C    | 3.804471  | -0.958339 | 0.162880  |
| C    | 3.651821  | -2.033390 | -0.691649 |
| H    | 2.262111  | -3.095386 | -1.954260 |
| H    | 0.399824  | -1.591206 | -1.562461 |
| C    | 2.878222  | 1.018732  | 1.337937  |
| H    | 4.745994  | -0.786639 | 0.677774  |
| H    | 4.472644  | -2.720003 | -0.868647 |
| C    | 1.827946  | 1.808343  | 1.627004  |
| C    | 0.530698  | 1.625639  | 0.980780  |
| H    | 3.838823  | 1.164369  | 1.825607  |
| H    | 1.879714  | 2.610673  | 2.354054  |
| O    | -0.461103 | 2.279239  | 1.282242  |
| N    | 0.479978  | 0.671387  | -0.036384 |

|   |           |           |           |
|---|-----------|-----------|-----------|
| C | -0.760474 | 0.596667  | -0.834192 |
| H | -0.479335 | 0.076334  | -1.751478 |
| C | -1.253886 | 1.955719  | -1.294437 |
| H | -1.886120 | 2.509720  | -0.610741 |
| C | -0.953849 | 2.434924  | -2.498292 |
| H | -0.321407 | 1.884588  | -3.192254 |
| H | -1.322099 | 3.401544  | -2.830113 |
| C | -1.850247 | -0.214877 | -0.145587 |
| C | -3.104154 | -0.305098 | -0.759124 |
| C | -1.631698 | -0.899824 | 1.049526  |
| C | -4.120731 | -1.063492 | -0.186761 |
| C | -2.650809 | -1.658469 | 1.624566  |
| H | -0.664953 | -0.841948 | 1.540974  |
| C | -3.897075 | -1.743048 | 1.010101  |
| H | -2.466737 | -2.182551 | 2.557672  |
| H | -4.689637 | -2.333229 | 1.459843  |
| H | -3.282415 | 0.224064  | -1.692195 |
| H | -5.088633 | -1.122965 | -0.675432 |

#### 4c

|                                              |                    |
|----------------------------------------------|--------------------|
| M06-2X/6-31G(d) SCF energy in solution:      | -824.58171393 a.u. |
| M06-2X/6-31G(d) enthalpy in solution:        | -824.278425 a.u.   |
| M06-2X/6-31G(d) free energy in solution:     | -824.338805 a.u.   |
| M06-2X/6-311+G(d,p) SCF energy in solution:  | -824.80965102 a.u. |
| M06-2X/6-311+G(d,p) enthalpy in solution:    | -824.506362 a.u.   |
| M06-2X/6-311+G(d,p) free energy in solution: | -824.566742 a.u.   |

#### Cartesian coordinates

| ATOM | X        | Y         | Z        |
|------|----------|-----------|----------|
| C    | 1.818121 | -2.632529 | 0.175130 |

|   |           |           |           |
|---|-----------|-----------|-----------|
| C | 0.957077  | -1.562608 | 0.354625  |
| C | 1.395825  | -0.249053 | 0.101026  |
| C | 2.710844  | -0.056809 | -0.379057 |
| C | 3.563585  | -1.160465 | -0.549446 |
| C | 3.132791  | -2.442216 | -0.268460 |
| H | 1.454647  | -3.635405 | 0.376966  |
| H | -0.057292 | -1.748270 | 0.678107  |
| C | 3.137904  | 1.276100  | -0.713842 |
| H | 4.570670  | -0.979845 | -0.915718 |
| H | 3.796143  | -3.289934 | -0.402674 |
| C | 2.296456  | 2.318600  | -0.593374 |
| C | 0.936864  | 2.156957  | -0.088427 |
| H | 4.151866  | 1.416219  | -1.079883 |
| H | 2.579720  | 3.332799  | -0.849957 |
| O | 0.165705  | 3.102874  | 0.033228  |
| N | 0.560320  | 0.857561  | 0.279074  |
| C | -0.762479 | 0.739373  | 0.922554  |
| H | -1.037077 | 1.783731  | 1.103721  |
| C | -0.627138 | 0.116781  | 2.299793  |
| H | 0.166692  | 0.571971  | 2.891510  |
| C | -1.380560 | -0.837602 | 2.836097  |
| H | -2.180916 | -1.327889 | 2.288542  |
| H | -1.209345 | -1.165738 | 3.856963  |
| C | -1.844497 | 0.178439  | 0.012558  |
| C | -3.174737 | 0.243552  | 0.446895  |
| C | -1.581434 | -0.322369 | -1.263090 |
| C | -4.211608 | -0.210754 | -0.361200 |
| C | -2.621077 | -0.776000 | -2.075616 |
| H | -0.563471 | -0.352648 | -1.638275 |
| C | -3.936972 | -0.728787 | -1.626701 |

|   |           |           |           |
|---|-----------|-----------|-----------|
| H | -2.395750 | -1.162669 | -3.064952 |
| H | -4.744854 | -1.082310 | -2.259998 |
| H | -3.396812 | 0.662339  | 1.425128  |
| H | -5.235882 | -0.151946 | -0.005617 |

### TS-1a

|                                              |                             |
|----------------------------------------------|-----------------------------|
| M06-2X/6-31G(d) SCF energy in solution:      | -1286.44831526 a.u.         |
| M06-2X/6-31G(d) enthalpy in solution:        | -1285.888792 a.u.           |
| M06-2X/6-31G(d) free energy in solution:     | -1285.975098 a.u.           |
| M06-2X/6-311+G(d,p) SCF energy in solution:  | -1286.80863424 a.u.         |
| M06-2X/6-311+G(d,p) enthalpy in solution:    | -1286.249111 a.u.           |
| M06-2X/6-311+G(d,p) free energy in solution: | -1286.335417 a.u.           |
| Imaginary frequency:                         | -1355.4818 cm <sup>-1</sup> |

### Cartesian coordinates

| ATOM | X        | Y         | Z         |
|------|----------|-----------|-----------|
| C    | 4.972937 | 0.847966  | -1.072762 |
| C    | 3.646177 | 0.471098  | -0.958544 |
| C    | 3.203486 | -0.249430 | 0.169086  |
| C    | 4.147137 | -0.571048 | 1.171107  |
| C    | 5.489583 | -0.178076 | 1.029041  |
| C    | 5.910119 | 0.526911  | -0.080864 |
| H    | 5.285664 | 1.402992  | -1.952104 |
| H    | 2.947280 | 0.732121  | -1.741808 |
| C    | 3.699344 | -1.301103 | 2.327189  |
| H    | 6.188581 | -0.442649 | 1.818255  |
| H    | 6.947070 | 0.828523  | -0.185087 |
| C    | 2.409442 | -1.661969 | 2.448092  |



|   |           |           |           |
|---|-----------|-----------|-----------|
| C | 1.411641  | -1.338620 | 1.427433  |
| H | 4.426421  | -1.550967 | 3.096201  |
| H | 2.035260  | -2.212359 | 3.303937  |
| O | 0.237932  | -1.675148 | 1.550457  |
| N | 1.864607  | -0.630773 | 0.313380  |
| C | 0.900518  | -0.330935 | -0.745450 |
| H | -0.435138 | -0.815565 | -0.483798 |
| C | 1.163411  | -1.100803 | -1.974972 |
| H | 0.660885  | -0.735210 | -2.870672 |
| C | 1.896843  | -2.218361 | -2.088388 |
| H | 2.428723  | -2.647711 | -1.242571 |
| H | 1.981883  | -2.735222 | -3.039021 |
| C | 0.557021  | 1.108118  | -0.867419 |
| C | 0.943619  | 2.056500  | 0.099492  |
| C | -0.299337 | 1.558457  | -1.892377 |
| C | 0.516637  | 3.380150  | 0.032468  |
| C | -0.721006 | 2.883297  | -1.958898 |
| H | -0.657001 | 0.859954  | -2.644020 |
| C | -0.316130 | 3.810345  | -0.999318 |
| H | -1.378219 | 3.190803  | -2.768144 |
| H | -0.646690 | 4.842942  | -1.051945 |
| H | 1.585122  | 1.750663  | 0.920944  |
| H | 0.843537  | 4.081443  | 0.795773  |
| C | -5.034615 | -0.019264 | 0.508419  |
| C | -2.606703 | -0.568589 | 0.114005  |
| C | -4.869901 | 0.482526  | 1.940690  |
| C | -2.120164 | 0.391181  | 1.178125  |
| C | -4.061801 | 1.777743  | 2.050477  |
| C | -2.818546 | 1.755988  | 1.158635  |
| H | -5.242816 | 0.823717  | -0.167507 |

|   |           |           |           |
|---|-----------|-----------|-----------|
| H | -2.229596 | -0.087133 | 2.158323  |
| H | -4.420024 | -0.315551 | 2.541133  |
| H | -3.764294 | 1.922403  | 3.095597  |
| H | -5.908934 | -0.674340 | 0.472421  |
| H | -5.872978 | 0.645016  | 2.348614  |
| H | -1.049334 | 0.503398  | 1.019141  |
| H | -4.693946 | 2.631144  | 1.779128  |
| H | -2.109220 | 2.523813  | 1.483241  |
| H | -3.085284 | 2.010787  | 0.125351  |
| C | -4.352901 | -1.707535 | -1.134254 |
| C | -3.309503 | -2.780107 | -1.391518 |
| C | -1.972783 | -2.106539 | -1.646601 |
| H | -1.154410 | -2.831555 | -1.653415 |
| H | -3.234323 | -3.432405 | -0.514961 |
| H | -3.607806 | -3.391778 | -2.246953 |
| H | -4.527638 | -1.113186 | -2.042374 |
| H | -5.305115 | -2.160659 | -0.846107 |
| H | -1.974770 | -1.610309 | -2.626841 |
| N | -1.681329 | -1.127403 | -0.608785 |
| N | -3.932349 | -0.827445 | -0.039130 |

### TS-1b

|                                              |                     |
|----------------------------------------------|---------------------|
| M06-2X/6-31G(d) SCF energy in solution:      | -1286.44348482 a.u. |
| M06-2X/6-31G(d) enthalpy in solution:        | -1285.883721 a.u.   |
| M06-2X/6-31G(d) free energy in solution:     | -1285.968945 a.u.   |
| M06-2X/6-311+G(d,p) SCF energy in solution:  | -1286.80565672 a.u. |
| M06-2X/6-311+G(d,p) enthalpy in solution:    | -1286.245893 a.u.   |
| M06-2X/6-311+G(d,p) free energy in solution: | -1286.331117 a.u.   |

Imaginary frequency: -1193.0183 cm<sup>-1</sup>

Cartesian coordinates

| ATOM | X         | Y         | Z         |
|------|-----------|-----------|-----------|
| C    | -1.394995 | -3.296568 | 0.738895  |
| C    | -1.359542 | -1.917261 | 0.855243  |
| C    | -2.260096 | -1.114660 | 0.126860  |
| C    | -3.241266 | -1.758164 | -0.664132 |
| C    | -3.250274 | -3.159564 | -0.770275 |
| C    | -2.329838 | -3.932700 | -0.089677 |
| H    | -0.690792 | -3.889996 | 1.314741  |
| H    | -0.654240 | -1.455607 | 1.533036  |
| C    | -4.237654 | -0.948624 | -1.314956 |
| H    | -4.009512 | -3.622068 | -1.395757 |
| H    | -2.344246 | -5.014121 | -0.175487 |
| C    | -4.269404 | 0.381680  | -1.115958 |
| C    | -3.281761 | 1.064410  | -0.277073 |
| H    | -4.976443 | -1.440732 | -1.943084 |
| H    | -5.026877 | 1.019809  | -1.557549 |
| O    | -3.340000 | 2.264930  | -0.048999 |
| N    | -2.220210 | 0.276079  | 0.195405  |
| C    | -1.125469 | 0.975958  | 0.869604  |
| H    | 0.164474  | 0.233468  | 1.014813  |
| C    | -1.420041 | 1.248826  | 2.282219  |
| H    | -0.748949 | 1.948278  | 2.779981  |
| C    | -2.360732 | 0.659149  | 3.037740  |
| H    | -3.073644 | -0.050258 | 2.624333  |
| H    | -2.453175 | 0.890411  | 4.094261  |
| C    | -0.490128 | 2.026240  | 0.036352  |
| C    | -0.588345 | 2.013588  | -1.370415 |

|   |           |           |           |
|---|-----------|-----------|-----------|
| C | 0.386636  | 2.978161  | 0.593113  |
| C | 0.131447  | 2.899938  | -2.164296 |
| C | 1.106508  | 3.865226  | -0.203396 |
| H | 0.515239  | 3.036467  | 1.669616  |
| C | 0.988699  | 3.839124  | -1.591106 |
| H | 1.765886  | 4.586513  | 0.272599  |
| H | 1.548412  | 4.532933  | -2.210501 |
| H | -1.240398 | 1.290014  | -1.852834 |
| H | 0.016639  | 2.855720  | -3.244469 |
| C | 4.377622  | -1.069209 | -0.648872 |
| C | 2.093799  | -0.565512 | 0.279290  |
| C | 3.892456  | -1.985263 | -1.768641 |
| C | 1.383263  | -0.836258 | -1.031159 |
| C | 3.098657  | -1.258093 | -2.855592 |
| C | 2.091595  | -0.268774 | -2.266442 |
| H | 4.741526  | -0.117564 | -1.061709 |
| H | 1.231013  | -1.917611 | -1.135128 |
| H | 3.304444  | -2.797179 | -1.326444 |
| H | 2.572515  | -1.999861 | -3.467374 |
| H | 5.227485  | -1.546006 | -0.154996 |
| H | 4.775378  | -2.453972 | -2.215055 |
| H | 0.389864  | -0.394927 | -0.932999 |
| H | 3.787050  | -0.725997 | -3.521850 |
| H | 1.338933  | -0.009527 | -3.017386 |
| H | 2.586638  | 0.672273  | -1.996799 |
| C | 4.053713  | -0.437748 | 1.708030  |
| C | 3.086136  | -0.611024 | 2.866105  |
| C | 1.832307  | 0.192770  | 2.573926  |
| H | 1.034796  | -0.027419 | 3.290176  |
| H | 2.832137  | -1.670712 | 2.976068  |

|   |          |           |          |
|---|----------|-----------|----------|
| H | 3.556810 | -0.275086 | 3.793365 |
| H | 4.417780 | 0.597033  | 1.658443 |
| H | 4.920121 | -1.091308 | 1.833834 |
| H | 2.042096 | 1.268879  | 2.634889 |
| N | 1.331735 | -0.121424 | 1.243026 |
| N | 3.415516 | -0.792538 | 0.432844 |

### TS-1c

|                                              |                             |
|----------------------------------------------|-----------------------------|
| M06-2X/6-31G(d) SCF energy in solution:      | -1286.44646381 a.u.         |
| M06-2X/6-31G(d) enthalpy in solution:        | -1285.886617 a.u.           |
| M06-2X/6-31G(d) free energy in solution:     | -1285.971486 a.u.           |
| M06-2X/6-311+G(d,p) SCF energy in solution:  | -1286.80575722 a.u.         |
| M06-2X/6-311+G(d,p) enthalpy in solution:    | -1286.245910 a.u.           |
| M06-2X/6-311+G(d,p) free energy in solution: | -1286.330779 a.u.           |
| Imaginary frequency:                         | -1289.3499 cm <sup>-1</sup> |

### Cartesian coordinates

| ATOM | X         | Y         | Z         |
|------|-----------|-----------|-----------|
| C    | -5.112362 | 0.596908  | 1.046147  |
| C    | -3.752224 | 0.378612  | 0.907514  |
| C    | -3.260363 | -0.389501 | -0.167654 |
| C    | -4.185904 | -0.900371 | -1.106813 |
| C    | -5.561739 | -0.668016 | -0.938243 |
| C    | -6.032739 | 0.069790  | 0.129986  |
| H    | -5.464188 | 1.193379  | 1.882561  |
| H    | -3.066088 | 0.803209  | 1.627911  |
| C    | -3.681159 | -1.636652 | -2.234847 |
| H    | -6.246688 | -1.079776 | -1.675003 |

|   |           |           |           |
|---|-----------|-----------|-----------|
| H | -7.095885 | 0.247121  | 0.253994  |
| C | -2.357071 | -1.808373 | -2.398360 |
| C | -1.379450 | -1.283655 | -1.443870 |
| H | -4.392377 | -2.037229 | -2.953348 |
| H | -1.938607 | -2.345490 | -3.242101 |
| O | -0.173288 | -1.426770 | -1.619036 |
| N | -1.891417 | -0.629583 | -0.322227 |
| C | -0.943500 | -0.180543 | 0.705358  |
| H | 0.403279  | -0.704375 | 0.509805  |
| C | -1.227567 | -0.839774 | 1.994678  |
| H | -1.619244 | -1.850598 | 1.856222  |
| C | -1.028353 | -0.440360 | 3.262032  |
| H | -0.675528 | 0.549197  | 3.531487  |
| H | -1.252855 | -1.115702 | 4.082273  |
| C | -0.630315 | 1.267308  | 0.638327  |
| C | -1.149145 | 2.105850  | -0.366717 |
| C | 0.332942  | 1.830532  | 1.502209  |
| C | -0.749586 | 3.434632  | -0.484518 |
| C | 0.727640  | 3.160046  | 1.384019  |
| H | 0.807148  | 1.205358  | 2.251125  |
| C | 0.186118  | 3.978679  | 0.393602  |
| H | 1.473822  | 3.555509  | 2.068346  |
| H | 0.493131  | 5.016081  | 0.303279  |
| H | -1.871506 | 1.709973  | -1.074322 |
| H | -1.178385 | 4.049617  | -1.271247 |
| C | 5.077249  | -0.314297 | -0.390596 |
| C | 2.601476  | -0.600143 | -0.028359 |
| C | 4.991239  | 0.226789  | -1.815604 |
| C | 2.237344  | 0.424809  | -1.080176 |
| C | 4.329025  | 1.603334  | -1.912542 |

|   |          |           |           |
|---|----------|-----------|-----------|
| C | 3.082145 | 1.704187  | -1.031227 |
| H | 5.359642 | 0.489751  | 0.305225  |
| H | 2.308022 | -0.049253 | -2.065794 |
| H | 4.468180 | -0.508045 | -2.436946 |
| H | 4.059251 | 1.794761  | -2.957598 |
| H | 5.877901 | -1.057186 | -0.352960 |
| H | 6.012534 | 0.287288  | -2.205810 |
| H | 1.183147 | 0.649536  | -0.936726 |
| H | 5.047198 | 2.379142  | -1.622779 |
| H | 2.464244 | 2.550130  | -1.348422 |
| H | 3.367776 | 1.912143  | 0.007533  |
| C | 4.197085 | -1.982121 | 1.179903  |
| C | 3.030748 | -2.929777 | 1.394976  |
| C | 1.789690 | -2.106123 | 1.686957  |
| H | 0.887365 | -2.726016 | 1.674754  |
| H | 2.876170 | -3.528735 | 0.491110  |
| H | 3.251511 | -3.609703 | 2.221885  |
| H | 4.440324 | -1.451779 | 2.111476  |
| H | 5.088224 | -2.533926 | 0.869355  |
| H | 1.849821 | -1.649615 | 2.683574  |
| N | 1.616169 | -1.063165 | 0.685580  |
| N | 3.886907 | -1.013146 | 0.123265  |

### 7a

|                                             |                     |
|---------------------------------------------|---------------------|
| M06-2X/6-31G(d) SCF energy in solution:     | -1286.46437685 a.u. |
| M06-2X/6-31G(d) enthalpy in solution:       | -1285.899335 a.u.   |
| M06-2X/6-31G(d) free energy in solution:    | -1285.986649 a.u.   |
| M06-2X/6-311+G(d,p) SCF energy in solution: | -1286.82875833 a.u. |

M06-2X/6-311+G(d,p) enthalpy in solution: -1286.263716 a.u.

M06-2X/6-311+G(d,p) free energy in solution: -1286.351030 a.u.

Cartesian coordinates

| ATOM | X         | Y         | Z         |
|------|-----------|-----------|-----------|
| C    | 5.357612  | 0.494960  | -1.357934 |
| C    | 4.011291  | 0.231886  | -1.184390 |
| C    | 3.517001  | -0.096539 | 0.092008  |
| C    | 4.414421  | -0.153324 | 1.181124  |
| C    | 5.779566  | 0.119387  | 0.975651  |
| C    | 6.255137  | 0.441364  | -0.279280 |
| H    | 5.722023  | 0.746920  | -2.349350 |
| H    | 3.321641  | 0.274711  | -2.018395 |
| C    | 3.891376  | -0.489727 | 2.476133  |
| H    | 6.449992  | 0.071281  | 1.829887  |
| H    | 7.308661  | 0.650681  | -0.432673 |
| C    | 2.578312  | -0.748996 | 2.639506  |
| C    | 1.644490  | -0.703633 | 1.521127  |
| H    | 4.577657  | -0.531094 | 3.318661  |
| H    | 2.151167  | -1.009379 | 3.601277  |
| O    | 0.441843  | -0.955459 | 1.676051  |
| N    | 2.160354  | -0.358692 | 0.284333  |
| C    | 1.252894  | -0.319142 | -0.838592 |
| H    | -0.805562 | -1.135619 | 0.339646  |
| C    | 1.178704  | -1.507450 | -1.610660 |
| H    | 0.550253  | -1.444010 | -2.500189 |
| C    | 1.811333  | -2.692841 | -1.394920 |
| H    | 2.464286  | -2.851223 | -0.540097 |
| H    | 1.692469  | -3.519632 | -2.087061 |
| C    | 0.542330  | 0.894622  | -1.062740 |



|   |           |           |           |
|---|-----------|-----------|-----------|
| C | -0.468324 | 1.031379  | -2.061099 |
| C | 0.785551  | 2.060997  | -0.279256 |
| C | -1.129297 | 2.231197  | -2.276649 |
| C | 0.108803  | 3.252701  | -0.503404 |
| H | 1.533519  | 2.020559  | 0.508116  |
| C | -0.853020 | 3.368510  | -1.509856 |
| H | 0.344294  | 4.112692  | 0.120229  |
| H | -1.376739 | 4.303131  | -1.682443 |
| H | -0.732888 | 0.175338  | -2.676045 |
| H | -1.883085 | 2.279185  | -3.060142 |
| C | -5.158322 | 0.032559  | 0.209324  |
| C | -2.733137 | -0.571359 | 0.314279  |
| C | -5.184501 | 0.662874  | 1.599064  |
| C | -2.335238 | 0.604174  | 1.179860  |
| C | -4.413844 | 1.981357  | 1.678483  |
| C | -3.092695 | 1.907329  | 0.915506  |
| H | -5.250841 | 0.797760  | -0.571828 |
| H | -2.439506 | 0.301129  | 2.229704  |
| H | -4.792504 | -0.065495 | 2.318120  |
| H | -4.223226 | 2.223381  | 2.730248  |
| H | -6.016150 | -0.634149 | 0.108520  |
| H | -6.232000 | 0.829237  | 1.869069  |
| H | -1.266744 | 0.752973  | 1.007120  |
| H | -5.025108 | 2.793332  | 1.268853  |
| H | -2.444801 | 2.742022  | 1.198761  |
| H | -3.263112 | 2.012657  | -0.162065 |
| C | -4.239304 | -1.937601 | -0.999838 |
| C | -3.295401 | -3.094186 | -0.716005 |
| C | -1.868248 | -2.593082 | -0.814951 |
| H | -1.145089 | -3.310406 | -0.421737 |

|   |           |           |           |
|---|-----------|-----------|-----------|
| H | -3.490179 | -3.488054 | 0.286683  |
| H | -3.467522 | -3.894419 | -1.439049 |
| H | -4.124586 | -1.584441 | -2.031833 |
| H | -5.276407 | -2.245969 | -0.859944 |
| H | -1.599334 | -2.385986 | -1.856584 |
| N | -1.739361 | -1.366270 | -0.035387 |
| N | -3.983890 | -0.816172 | -0.078776 |

### 7b

|                                              |                     |
|----------------------------------------------|---------------------|
| M06-2X/6-31G(d) SCF energy in solution:      | -1286.45259358 a.u. |
| M06-2X/6-31G(d) enthalpy in solution:        | -1285.888823 a.u.   |
| M06-2X/6-31G(d) free energy in solution:     | -1285.977387 a.u.   |
| M06-2X/6-311+G(d,p) SCF energy in solution:  | -1286.81782527 a.u. |
| M06-2X/6-311+G(d,p) enthalpy in solution:    | -1286.254055 a.u.   |
| M06-2X/6-311+G(d,p) free energy in solution: | -1286.342619 a.u.   |

### Cartesian coordinates

| ATOM | X         | Y         | Z         |
|------|-----------|-----------|-----------|
| C    | -0.207981 | -1.312306 | 2.115286  |
| C    | 0.538189  | -0.637327 | 1.164762  |
| C    | 1.538739  | -1.311634 | 0.436653  |
| C    | 1.766923  | -2.681234 | 0.705345  |
| C    | 0.986101  | -3.345340 | 1.667413  |
| C    | 0.003649  | -2.675562 | 2.372512  |
| H    | -0.968674 | -0.769938 | 2.670894  |
| H    | 0.369730  | 0.415585  | 0.972334  |
| C    | 2.812283  | -3.352408 | -0.022700 |
| H    | 1.179930  | -4.399267 | 1.850543  |

|   |           |           |           |
|---|-----------|-----------|-----------|
| H | -0.589348 | -3.192710 | 3.120026  |
| C | 3.560344  | -2.682299 | -0.918729 |
| C | 3.348277  | -1.260381 | -1.208965 |
| H | 2.986733  | -4.407510 | 0.175366  |
| H | 4.360629  | -3.156670 | -1.476119 |
| O | 4.038369  | -0.651280 | -2.014412 |
| N | 2.303397  | -0.641593 | -0.513638 |
| C | 1.966306  | 0.718808  | -0.862082 |
| H | -1.068508 | -0.431560 | -1.477399 |
| C | 1.082093  | 0.862706  | -1.935561 |
| H | 0.818714  | 1.889363  | -2.194488 |
| C | 0.477422  | -0.125012 | -2.686596 |
| H | 0.770507  | -1.169008 | -2.587911 |
| H | -0.102286 | 0.138316  | -3.566053 |
| C | 2.536498  | 1.770214  | -0.065705 |
| C | 2.253481  | 3.146973  | -0.277882 |
| C | 3.413953  | 1.480544  | 1.011492  |
| C | 2.804523  | 4.137832  | 0.520830  |
| C | 3.959275  | 2.482155  | 1.805336  |
| H | 3.671997  | 0.445714  | 1.217547  |
| C | 3.665047  | 3.826504  | 1.577527  |
| H | 4.628253  | 2.203861  | 2.616449  |
| H | 4.093108  | 4.607061  | 2.198215  |
| H | 1.592806  | 3.443531  | -1.087058 |
| H | 2.557424  | 5.176505  | 0.313228  |
| C | -5.005687 | 0.552646  | 0.545058  |
| C | -2.811172 | 0.080711  | -0.572016 |
| C | -4.513862 | 1.860219  | 1.156711  |
| C | -2.438755 | 1.529291  | -0.800029 |
| C | -4.307881 | 2.974258  | 0.130340  |

|   |           |           |           |
|---|-----------|-----------|-----------|
| C | -3.607137 | 2.461367  | -1.126887 |
| H | -5.767937 | 0.738716  | -0.222330 |
| H | -1.888904 | 1.885179  | 0.080854  |
| H | -3.589414 | 1.660581  | 1.711126  |
| H | -3.713974 | 3.774825  | 0.585115  |
| H | -5.475598 | -0.045281 | 1.328507  |
| H | -5.254428 | 2.174994  | 1.898342  |
| H | -1.718727 | 1.522526  | -1.623150 |
| H | -5.275295 | 3.409002  | -0.144259 |
| H | -3.226519 | 3.303078  | -1.712134 |
| H | -4.319560 | 1.933945  | -1.772328 |
| C | -4.273493 | -1.757371 | -0.055781 |
| C | -3.028651 | -2.577750 | 0.245358  |
| C | -1.957522 | -2.239012 | -0.774495 |
| H | -0.965597 | -2.554447 | -0.434263 |
| H | -2.678074 | -2.341709 | 1.254781  |
| H | -3.263229 | -3.643801 | 0.204695  |
| H | -4.674799 | -2.006794 | -1.045437 |
| H | -5.052241 | -1.943983 | 0.684016  |
| H | -2.161170 | -2.722122 | -1.735957 |
| N | -1.911465 | -0.794389 | -0.976466 |
| N | -3.955971 | -0.319345 | -0.020043 |

### 7c

|                                             |                     |
|---------------------------------------------|---------------------|
| M06-2X/6-31G(d) SCF energy in solution:     | -1286.45971970 a.u. |
| M06-2X/6-31G(d) enthalpy in solution:       | -1285.894541 a.u.   |
| M06-2X/6-31G(d) free energy in solution:    | -1285.982364 a.u.   |
| M06-2X/6-311+G(d,p) SCF energy in solution: | -1286.82280038 a.u. |

M06-2X/6-311+G(d,p) enthalpy in solution: -1286.257622 a.u.

M06-2X/6-311+G(d,p) free energy in solution: -1286.345445 a.u.

Cartesian coordinates

| ATOM | X         | Y         | Z         |
|------|-----------|-----------|-----------|
| C    | 5.487567  | 0.193399  | -1.311851 |
| C    | 4.127366  | 0.016646  | -1.134502 |
| C    | 3.601731  | -0.165641 | 0.160107  |
| C    | 4.484883  | -0.144816 | 1.263541  |
| C    | 5.865196  | 0.029268  | 1.052184  |
| C    | 6.371297  | 0.194442  | -0.220994 |
| H    | 5.872677  | 0.335088  | -2.317217 |
| H    | 3.456627  | 0.013307  | -1.984413 |
| C    | 3.931328  | -0.285797 | 2.580885  |
| H    | 6.522547  | 0.035800  | 1.917889  |
| H    | 7.436299  | 0.329487  | -0.378365 |
| C    | 2.601230  | -0.424910 | 2.752731  |
| C    | 1.681158  | -0.458714 | 1.623638  |
| H    | 4.606364  | -0.270603 | 3.433291  |
| H    | 2.148374  | -0.529443 | 3.732133  |
| O    | 0.460930  | -0.578863 | 1.795879  |
| N    | 2.231754  | -0.354344 | 0.356095  |
| C    | 1.338294  | -0.396056 | -0.784605 |
| H    | -0.787371 | -0.893050 | 0.504752  |
| C    | 1.398236  | -1.598295 | -1.543717 |
| H    | 1.964305  | -2.378343 | -1.025387 |
| C    | 0.930520  | -1.957030 | -2.775111 |
| H    | 0.421289  | -1.283970 | -3.453951 |
| H    | 1.137077  | -2.954931 | -3.149071 |
| C    | 0.621616  | 0.808924  | -1.059220 |

|   |           |           |           |
|---|-----------|-----------|-----------|
| C | -0.430786 | 0.878320  | -2.016045 |
| C | 0.883662  | 2.015347  | -0.347124 |
| C | -1.127251 | 2.056656  | -2.254280 |
| C | 0.181967  | 3.185334  | -0.598836 |
| H | 1.665240  | 2.025854  | 0.407526  |
| C | -0.830101 | 3.232792  | -1.562414 |
| H | 0.433323  | 4.080354  | -0.033983 |
| H | -1.372280 | 4.152019  | -1.760683 |
| H | -0.728913 | -0.019979 | -2.542851 |
| H | -1.924118 | 2.053177  | -2.995410 |
| C | -5.231575 | -0.179132 | 0.182682  |
| C | -2.757874 | -0.507351 | 0.367667  |
| C | -5.324855 | 0.646925  | 1.462602  |
| C | -2.479158 | 0.835728  | 1.008226  |
| C | -4.699546 | 2.035902  | 1.330877  |
| C | -3.379848 | 1.990184  | 0.563432  |
| H | -5.405572 | 0.445230  | -0.702587 |
| H | -2.530663 | 0.704660  | 2.096969  |
| H | -4.855321 | 0.081018  | 2.275299  |
| H | -4.534008 | 2.452260  | 2.331055  |
| H | -6.013273 | -0.940483 | 0.196154  |
| H | -6.383604 | 0.740268  | 1.723619  |
| H | -1.434734 | 1.064382  | 0.775918  |
| H | -5.394877 | 2.708186  | 0.815786  |
| H | -2.829578 | 2.924723  | 0.704865  |
| H | -3.563823 | 1.910164  | -0.514276 |
| C | -4.087287 | -2.204162 | -0.719114 |
| C | -3.086951 | -3.217016 | -0.184528 |
| C | -1.693188 | -2.635719 | -0.317353 |
| H | -0.958343 | -3.192309 | 0.270507  |

|   |           |           |           |
|---|-----------|-----------|-----------|
| H | -3.314720 | -3.432928 | 0.864330  |
| H | -3.164270 | -4.147272 | -0.751553 |
| H | -3.919680 | -2.019881 | -1.787184 |
| H | -5.108292 | -2.565181 | -0.590964 |
| H | -1.353357 | -2.635544 | -1.358627 |
| N | -1.694103 | -1.262707 | 0.177327  |
| N | -3.972018 | -0.930453 | 0.011740  |

### TS-2a

|                                              |                             |
|----------------------------------------------|-----------------------------|
| M06-2X/6-31G(d) SCF energy in solution:      | -1286.45410932 a.u.         |
| M06-2X/6-31G(d) enthalpy in solution:        | -1285.894536 a.u.           |
| M06-2X/6-31G(d) free energy in solution:     | -1285.979113 a.u.           |
| M06-2X/6-311+G(d,p) SCF energy in solution:  | -1286.81282878 a.u.         |
| M06-2X/6-311+G(d,p) enthalpy in solution:    | -1286.253255 a.u.           |
| M06-2X/6-311+G(d,p) free energy in solution: | -1286.337832 a.u.           |
| Imaginary frequency:                         | -1222.4093 cm <sup>-1</sup> |

### Cartesian coordinates

| ATOM | X         | Y         | Z         |
|------|-----------|-----------|-----------|
| C    | -4.984158 | -0.203876 | 1.175383  |
| C    | -3.664675 | 0.187226  | 1.033597  |
| C    | -2.852536 | -0.411241 | 0.051756  |
| C    | -3.410285 | -1.405953 | -0.781954 |
| C    | -4.753501 | -1.786434 | -0.612769 |
| C    | -5.541101 | -1.197495 | 0.356282  |
| H    | -5.594360 | 0.271561  | 1.937402  |
| H    | -3.246210 | 0.955233  | 1.672118  |
| C    | -2.579956 | -1.989037 | -1.801077 |

|   |           |           |           |
|---|-----------|-----------|-----------|
| H | -5.157816 | -2.553723 | -1.267835 |
| H | -6.576802 | -1.495095 | 0.481861  |
| C | -1.301164 | -1.593581 | -1.956252 |
| C | -0.693288 | -0.581470 | -1.093665 |
| H | -3.012398 | -2.747074 | -2.449785 |
| H | -0.658507 | -2.000886 | -2.729023 |
| O | 0.474725  | -0.221191 | -1.224991 |
| N | -1.518250 | -0.037324 | -0.108588 |
| C | -0.931439 | 0.958760  | 0.758703  |
| H | 0.625034  | -1.301394 | 1.981460  |
| C | -0.603351 | 0.581983  | 2.029228  |
| H | -0.183672 | 1.367982  | 2.658280  |
| C | -0.636016 | -0.727586 | 2.591623  |
| H | -1.362042 | -1.425386 | 2.166949  |
| H | -0.594921 | -0.773781 | 3.679845  |
| C | -0.710036 | 2.280129  | 0.169835  |
| C | 0.161028  | 3.223266  | 0.753423  |
| C | -1.356918 | 2.658067  | -1.022168 |
| C | 0.350899  | 4.478847  | 0.188079  |
| C | -1.158863 | 3.913149  | -1.588554 |
| H | -2.029129 | 1.956439  | -1.508354 |
| C | -0.306870 | 4.838556  | -0.988652 |
| H | -1.678419 | 4.169105  | -2.508058 |
| H | -0.151209 | 5.816971  | -1.432243 |
| H | 0.710841  | 2.965637  | 1.654353  |
| H | 1.031038  | 5.178865  | 0.666019  |
| C | 4.220118  | -0.839508 | -0.993149 |
| C | 2.421974  | -1.123114 | 0.743240  |
| C | 3.849458  | 0.621385  | -1.236263 |
| C | 2.538286  | 0.289469  | 1.276260  |



|   |           |           |           |
|---|-----------|-----------|-----------|
| C | 4.259618  | 1.542590  | -0.086727 |
| C | 3.933959  | 0.913207  | 1.266888  |
| H | 5.215526  | -0.920931 | -0.535525 |
| H | 1.830917  | 0.897141  | 0.697431  |
| H | 2.769420  | 0.672792  | -1.414163 |
| H | 3.728493  | 2.496899  | -0.184753 |
| H | 4.272459  | -1.348301 | -1.958180 |
| H | 4.340388  | 0.943009  | -2.160585 |
| H | 2.149403  | 0.249936  | 2.296801  |
| H | 5.332217  | 1.761935  | -0.144329 |
| H | 3.986371  | 1.672888  | 2.053130  |
| H | 4.680882  | 0.152139  | 1.524197  |
| C | 3.114741  | -3.033587 | -0.538397 |
| C | 1.641351  | -3.407652 | -0.600786 |
| C | 1.033113  | -3.128848 | 0.762401  |
| H | -0.062915 | -3.100109 | 0.709592  |
| H | 1.159527  | -2.788331 | -1.363231 |
| H | 1.521507  | -4.460162 | -0.870253 |
| H | 3.632984  | -3.636991 | 0.218114  |
| H | 3.606703  | -3.201499 | -1.497257 |
| H | 1.304934  | -3.919080 | 1.472724  |
| N | 1.470585  | -1.841818 | 1.285460  |
| N | 3.243325  | -1.610826 | -0.203226 |

### TS-2b

M06-2X/6-31G(d) SCF energy in solution: -1286.45053353 a.u.

M06-2X/6-31G(d) enthalpy in solution: -1285.891018 a.u.

M06-2X/6-31G(d) free energy in solution: -1285.978065 a.u.

M06-2X/6-311+G(d,p) SCF energy in solution: -1286.81178191 a.u.  
M06-2X/6-311+G(d,p) enthalpy in solution: -1286.252266 a.u.  
M06-2X/6-311+G(d,p) free energy in solution: -1286.339313 a.u.  
Imaginary frequency: -986.3759 cm-1

Cartesian coordinates

| ATOM | X         | Y         | Z         |
|------|-----------|-----------|-----------|
| C    | -0.123133 | -1.417348 | 2.115265  |
| C    | 0.605008  | -0.696219 | 1.184962  |
| C    | 1.551818  | -1.346774 | 0.370371  |
| C    | 1.745962  | -2.737911 | 0.525336  |
| C    | 0.984342  | -3.447390 | 1.470466  |
| C    | 0.055039  | -2.801317 | 2.263849  |
| H    | -0.845378 | -0.896033 | 2.737480  |
| H    | 0.453521  | 0.370851  | 1.073433  |
| C    | 2.736081  | -3.383451 | -0.297402 |
| H    | 1.149767  | -4.517385 | 1.567721  |
| H    | -0.525238 | -3.354096 | 2.995612  |
| C    | 3.463935  | -2.675450 | -1.181585 |
| C    | 3.281112  | -1.233370 | -1.364487 |
| H    | 2.885512  | -4.454433 | -0.181799 |
| H    | 4.219817  | -3.133525 | -1.809831 |
| O    | 3.936623  | -0.581075 | -2.165772 |
| N    | 2.300909  | -0.638692 | -0.564582 |
| C    | 2.020969  | 0.762022  | -0.778315 |
| H    | -1.059359 | -0.198549 | -1.441282 |
| C    | 1.014958  | 1.051889  | -1.659549 |
| H    | 0.785097  | 2.109930  | -1.791813 |
| C    | 0.173542  | 0.136697  | -2.350235 |
| H    | 0.569174  | -0.871970 | -2.498853 |

|   |           |           |           |
|---|-----------|-----------|-----------|
| H | -0.312689 | 0.535168  | -3.242373 |
| C | 2.808010  | 1.712880  | 0.001069  |
| C | 2.679626  | 3.110664  | -0.152784 |
| C | 3.734651  | 1.262644  | 0.962952  |
| C | 3.424976  | 3.995179  | 0.615108  |
| C | 4.480702  | 2.153847  | 1.728567  |
| H | 3.871317  | 0.195614  | 1.111462  |
| C | 4.333812  | 3.529296  | 1.567187  |
| H | 5.184255  | 1.763912  | 2.459414  |
| H | 4.916385  | 4.224179  | 2.163815  |
| H | 1.994178  | 3.514207  | -0.891609 |
| H | 3.297863  | 5.063927  | 0.463844  |
| C | -5.251999 | 0.542415  | 0.504714  |
| C | -2.955368 | 0.181259  | -0.463651 |
| C | -4.912225 | 1.897661  | 1.117889  |
| C | -2.663074 | 1.658109  | -0.642475 |
| C | -4.695104 | 2.999029  | 0.079479  |
| C | -3.852281 | 2.508915  | -1.097509 |
| H | -5.951319 | 0.662053  | -0.334431 |
| H | -2.248790 | 2.047994  | 0.295640  |
| H | -4.030315 | 1.780097  | 1.757834  |
| H | -4.201023 | 3.851504  | 0.559350  |
| H | -5.761243 | -0.061683 | 1.258957  |
| H | -5.737484 | 2.176691  | 1.780601  |
| H | -1.856422 | 1.710965  | -1.377459 |
| H | -5.663224 | 3.356764  | -0.288772 |
| H | -3.476592 | 3.363635  | -1.667474 |
| H | -4.470392 | 1.925650  | -1.790558 |
| C | -4.353301 | -1.722232 | 0.049632  |
| C | -3.063181 | -2.489758 | 0.292314  |

|   |           |           |           |
|---|-----------|-----------|-----------|
| C | -2.041057 | -2.070074 | -0.747734 |
| H | -1.032725 | -2.403522 | -0.476843 |
| H | -2.691287 | -2.260121 | 1.296193  |
| H | -3.251467 | -3.564886 | 0.236088  |
| H | -4.794209 | -1.999255 | -0.916756 |
| H | -5.084701 | -1.944847 | 0.828677  |
| H | -2.282973 | -2.502711 | -1.726084 |
| N | -2.004384 | -0.620061 | -0.866841 |
| N | -4.103090 | -0.273934 | 0.073622  |

### TS-2c

|                                              |                            |
|----------------------------------------------|----------------------------|
| M06-2X/6-31G(d) SCF energy in solution:      | -1286.44676720 a.u.        |
| M06-2X/6-31G(d) enthalpy in solution:        | -1285.886912 a.u.          |
| M06-2X/6-31G(d) free energy in solution:     | -1285.974916 a.u.          |
| M06-2X/6-311+G(d,p) SCF energy in solution:  | -1286.80638090 a.u.        |
| M06-2X/6-311+G(d,p) enthalpy in solution:    | -1286.246526 a.u.          |
| M06-2X/6-311+G(d,p) free energy in solution: | -1286.334530 a.u.          |
| Imaginary frequency:                         | -955.7817 cm <sup>-1</sup> |

### Cartesian coordinates

| ATOM | X         | Y         | Z         |
|------|-----------|-----------|-----------|
| C    | -5.179571 | -1.248375 | 2.116882  |
| C    | -3.973039 | -0.903495 | 1.533093  |
| C    | -3.899095 | -0.677591 | 0.145222  |
| C    | -5.074937 | -0.795514 | -0.629559 |
| C    | -6.285163 | -1.153392 | -0.010472 |
| C    | -6.346612 | -1.382018 | 1.350451  |
| H    | -5.215963 | -1.416852 | 3.188999  |

|   |           |           |           |
|---|-----------|-----------|-----------|
| H | -3.078447 | -0.805785 | 2.135739  |
| C | -4.991664 | -0.532213 | -2.041852 |
| H | -7.174055 | -1.242268 | -0.629730 |
| H | -7.284281 | -1.656565 | 1.822133  |
| C | -3.823321 | -0.173765 | -2.607843 |
| C | -2.592668 | -0.043460 | -1.828190 |
| H | -5.895934 | -0.625304 | -2.638730 |
| H | -3.730756 | 0.034154  | -3.667954 |
| O | -1.525589 | 0.289299  | -2.334534 |
| N | -2.696114 | -0.327086 | -0.465122 |
| C | -1.487451 | -0.204494 | 0.324890  |
| H | 1.546901  | -1.269122 | 0.235347  |
| C | -0.791003 | -1.364849 | 0.553551  |
| H | -1.238293 | -2.228602 | 0.054626  |
| C | 0.415145  | -1.641807 | 1.260141  |
| H | 0.688022  | -0.973429 | 2.079250  |
| H | 0.544813  | -2.693968 | 1.518103  |
| C | -1.152260 | 1.153330  | 0.743440  |
| C | 0.153746  | 1.520743  | 1.130703  |
| C | -2.127958 | 2.173320  | 0.743815  |
| C | 0.454306  | 2.823929  | 1.518602  |
| C | -1.822970 | 3.471093  | 1.134652  |
| H | -3.142986 | 1.940808  | 0.434629  |
| C | -0.529370 | 3.810189  | 1.533270  |
| H | -2.604815 | 4.225797  | 1.127836  |
| H | -0.292714 | 4.824498  | 1.839317  |
| H | 0.950531  | 0.787453  | 1.093908  |
| H | 1.473974  | 3.069487  | 1.804423  |
| C | 5.905049  | 0.109945  | -0.708917 |
| C | 3.577376  | -0.666436 | -0.184931 |

|   |          |           |           |
|---|----------|-----------|-----------|
| C | 6.393903 | 0.133326  | 0.737492  |
| C | 3.982573 | -1.391021 | 1.084286  |
| C | 6.507068 | -1.257878 | 1.364131  |
| C | 5.315013 | -2.145626 | 1.006058  |
| H | 6.355863 | -0.729220 | -1.256150 |
| H | 4.004081 | -0.666327 | 1.907903  |
| H | 5.723702 | 0.774518  | 1.320796  |
| H | 6.577552 | -1.155218 | 2.452979  |
| H | 6.235991 | 1.024740  | -1.204626 |
| H | 7.374047 | 0.620445  | 0.750581  |
| H | 3.170014 | -2.086759 | 1.301938  |
| H | 7.432039 | -1.740411 | 1.028752  |
| H | 5.273876 | -3.002321 | 1.684976  |
| H | 5.438315 | -2.559049 | -0.001888 |
| C | 3.975222 | 0.775058  | -2.104678 |
| C | 2.497134 | 1.113560  | -2.010344 |
| C | 1.724207 | -0.150715 | -1.684242 |
| H | 0.673656 | 0.054985  | -1.456170 |
| H | 2.335881 | 1.856672  | -1.221207 |
| H | 2.158761 | 1.543664  | -2.956183 |
| H | 4.173601 | 0.142210  | -2.979415 |
| H | 4.569745 | 1.685752  | -2.208774 |
| H | 1.744678 | -0.842599 | -2.535665 |
| N | 2.321692 | -0.804294 | -0.525359 |
| N | 4.442271 | 0.086118  | -0.890575 |

### TS-3

|                                          |                    |
|------------------------------------------|--------------------|
| M06-2X/6-31G(d) SCF energy in solution:  | -824.55770436 a.u. |
| M06-2X/6-31G(d) enthalpy in solution:    | -824.255985 a.u.   |
| M06-2X/6-31G(d) free energy in solution: | -824.313644 a.u.   |

M06-2X/6-311+G(d,p) SCF energy in solution: -1286.77461316 a.u.  
M06-2X/6-311+G(d,p) enthalpy in solution: -1286.472894 a.u.  
M06-2X/6-311+G(d,p) free energy in solution: -1286.530553 a.u.  
Imaginary frequency: -47.6130 cm<sup>-1</sup>

Cartesian coordinates

| ATOM | X         | Y         | Z         |
|------|-----------|-----------|-----------|
| C    | -0.037052 | -2.901175 | -1.000597 |
| C    | 0.046394  | -1.516746 | -0.979358 |
| C    | -0.906826 | -0.757572 | -0.283206 |
| C    | -2.005546 | -1.427609 | 0.298052  |
| C    | -2.060991 | -2.829600 | 0.278302  |
| C    | -1.075899 | -3.571707 | -0.347941 |
| H    | 0.713496  | -3.462130 | -1.548705 |
| H    | 0.844818  | -1.026574 | -1.519512 |
| C    | -3.111863 | -0.646674 | 0.805265  |
| H    | -2.912763 | -3.317648 | 0.744207  |
| H    | -1.127802 | -4.655244 | -0.363803 |
| C    | -3.181028 | 0.665298  | 0.526590  |
| C    | -2.107061 | 1.332109  | -0.218226 |
| H    | -3.912266 | -1.157280 | 1.334125  |
| H    | -4.034695 | 1.283022  | 0.782301  |
| O    | -2.259826 | 2.394585  | -0.787607 |
| N    | -0.857771 | 0.659026  | -0.201292 |
| C    | 0.368005  | 1.398137  | -0.103845 |
| C    | 0.545057  | 2.728651  | 0.049728  |
| H    | 1.598802  | 2.968278  | 0.163017  |
| C    | -0.344897 | 3.929275  | 0.210689  |
| H    | -0.851411 | 4.201319  | -0.718269 |
| H    | 0.270973  | 4.772757  | 0.533798  |

|   |           |           |           |
|---|-----------|-----------|-----------|
| C | 1.623436  | 0.593792  | 0.075020  |
| C | 2.691500  | 0.741427  | -0.813076 |
| C | 1.770916  | -0.250731 | 1.180877  |
| C | 3.880284  | 0.041716  | -0.612410 |
| C | 2.956914  | -0.949656 | 1.380564  |
| H | 0.949054  | -0.363159 | 1.883504  |
| C | 4.013897  | -0.810323 | 0.480946  |
| H | 3.057972  | -1.601621 | 2.242973  |
| H | 4.937702  | -1.359234 | 0.635900  |
| H | 2.581706  | 1.399445  | -1.670608 |
| H | 4.699552  | 0.160781  | -1.315072 |
| H | -1.123582 | 3.775757  | 0.961794  |

#### TS-4

|                                              |                           |
|----------------------------------------------|---------------------------|
| M06-2X/6-31G(d) SCF energy in solution:      | -824.55770436 a.u.        |
| M06-2X/6-31G(d) enthalpy in solution:        | -824.255985 a.u.          |
| M06-2X/6-31G(d) free energy in solution:     | -824.313644 a.u.          |
| M06-2X/6-311+G(d,p) SCF energy in solution:  | -824.78422971 a.u.        |
| M06-2X/6-311+G(d,p) enthalpy in solution:    | -824.482510 a.u.          |
| M06-2X/6-311+G(d,p) free energy in solution: | -824.540169 a.u.          |
| Imaginary frequency:                         | -47.6130 cm <sup>-1</sup> |

#### Cartesian coordinates

| ATOM | X         | Y         | Z         |
|------|-----------|-----------|-----------|
| C    | -0.037052 | -2.901175 | -1.000597 |
| C    | 0.046394  | -1.516746 | -0.979358 |
| C    | -0.906826 | -0.757572 | -0.283206 |
| C    | -2.005546 | -1.427609 | 0.298052  |
| C    | -2.060991 | -2.829600 | 0.278302  |



|   |           |           |           |
|---|-----------|-----------|-----------|
| C | -1.075899 | -3.571707 | -0.347941 |
| H | 0.713496  | -3.462130 | -1.548705 |
| H | 0.844818  | -1.026574 | -1.519512 |
| C | -3.111863 | -0.646674 | 0.805265  |
| H | -2.912763 | -3.317648 | 0.744207  |
| H | -1.127802 | -4.655244 | -0.363803 |
| C | -3.181028 | 0.665298  | 0.526590  |
| C | -2.107061 | 1.332109  | -0.218226 |
| H | -3.912266 | -1.157280 | 1.334125  |
| H | -4.034695 | 1.283022  | 0.782301  |
| O | -2.259826 | 2.394585  | -0.787607 |
| N | -0.857771 | 0.659026  | -0.201292 |
| C | 0.368005  | 1.398137  | -0.103845 |
| C | 0.545057  | 2.728651  | 0.049728  |
| H | 1.598802  | 2.968278  | 0.163017  |
| C | -0.344897 | 3.929275  | 0.210689  |
| H | -0.851411 | 4.201319  | -0.718269 |
| H | 0.270973  | 4.772757  | 0.533798  |
| C | 1.623436  | 0.593792  | 0.075020  |
| C | 2.691500  | 0.741427  | -0.813076 |
| C | 1.770916  | -0.250731 | 1.180877  |
| C | 3.880284  | 0.041716  | -0.612410 |
| C | 2.956914  | -0.949656 | 1.380564  |
| H | 0.949054  | -0.363159 | 1.883504  |
| C | 4.013897  | -0.810323 | 0.480946  |
| H | 3.057972  | -1.601621 | 2.242973  |
| H | 4.937702  | -1.359234 | 0.635900  |
| H | 2.581706  | 1.399445  | -1.670608 |
| H | 4.699552  | 0.160781  | -1.315072 |
| H | -1.123582 | 3.775757  | 0.961794  |

## TS-5

M06-2X/6-31G(d) SCF energy in solution: -1286.43884080 a.u.  
M06-2X/6-31G(d) enthalpy in solution: -1285.875372 a.u.  
M06-2X/6-31G(d) free energy in solution: -1285.961578 a.u.  
M06-2X/6-311+G(d,p) SCF energy in solution: -1286.80172522 a.u.  
M06-2X/6-311+G(d,p) enthalpy in solution: -1286.238256 a.u.  
M06-2X/6-311+G(d,p) free energy in solution: -1286.324462 a.u.  
Imaginary frequency: -153.6640 cm<sup>-1</sup>

### Cartesian coordinates

| ATOM | X        | Y         | Z         |
|------|----------|-----------|-----------|
| C    | 4.805820 | 0.193524  | 1.816389  |
| C    | 3.633930 | 0.529736  | 1.164640  |
| C    | 3.265780 | -0.140213 | -0.018616 |
| C    | 4.113926 | -1.152640 | -0.521207 |
| C    | 5.300298 | -1.475838 | 0.164660  |
| C    | 5.649813 | -0.815706 | 1.324540  |
| H    | 5.072743 | 0.722582  | 2.726434  |
| H    | 2.984969 | 1.306728  | 1.548679  |
| C    | 3.741023 | -1.813765 | -1.739133 |
| H    | 5.935931 | -2.256753 | -0.244725 |
| H    | 6.564577 | -1.069555 | 1.850007  |
| C    | 2.599134 | -1.479174 | -2.374272 |
| C    | 1.699695 | -0.464593 | -1.845264 |
| H    | 4.397445 | -2.584497 | -2.135643 |
| H    | 2.281557 | -1.958080 | -3.293632 |
| O    | 0.634109 | -0.189752 | -2.424038 |
| N    | 2.076110 | 0.179011  | -0.678832 |
| C    | 1.223801 | 1.239922  | -0.189546 |

|   |           |           |           |
|---|-----------|-----------|-----------|
| C | 1.162940  | 2.440057  | -1.058705 |
| H | 0.420085  | 2.476503  | -1.867287 |
| C | 1.989293  | 3.484126  | -0.958728 |
| H | 2.761890  | 3.522910  | -0.193069 |
| H | 1.926903  | 4.332467  | -1.638599 |
| C | 0.407047  | 1.013751  | 0.919438  |
| C | -0.492478 | 2.019967  | 1.421523  |
| C | 0.403542  | -0.216159 | 1.665024  |
| C | -1.313227 | 1.796846  | 2.513123  |
| C | -0.418022 | -0.405901 | 2.765292  |
| H | 1.061640  | -1.024028 | 1.353464  |
| C | -1.307348 | 0.579345  | 3.211150  |
| H | -0.368471 | -1.360244 | 3.288108  |
| H | -1.941568 | 0.420225  | 4.076811  |
| H | -0.502172 | 2.993793  | 0.937650  |
| H | -1.968734 | 2.602036  | 2.842784  |
| H | -0.865231 | 0.441283  | -1.656455 |
| C | -4.517702 | -1.028375 | 0.540516  |
| C | -2.479096 | -0.278353 | -0.697468 |
| C | -4.514328 | -2.415864 | -0.096601 |
| C | -1.787096 | -1.624361 | -0.671295 |
| C | -3.370850 | -3.304346 | 0.396079  |
| C | -2.073957 | -2.512875 | 0.538755  |
| H | -4.248611 | -1.074927 | 1.603033  |
| H | -2.034632 | -2.145876 | -1.605401 |
| H | -4.474899 | -2.295253 | -1.185544 |
| H | -3.231040 | -4.135730 | -0.304339 |
| H | -5.526545 | -0.616256 | 0.481622  |
| H | -5.475455 | -2.889627 | 0.125839  |
| H | -0.719152 | -1.397093 | -0.720686 |

|   |           |           |           |
|---|-----------|-----------|-----------|
| H | -3.633434 | -3.742744 | 1.365356  |
| H | -1.228080 | -3.195108 | 0.670075  |
| H | -2.104462 | -1.889625 | 1.437831  |
| C | -4.130933 | 1.361117  | -0.079967 |
| C | -3.807329 | 2.073261  | -1.383517 |
| C | -2.306623 | 2.021764  | -1.595246 |
| H | -2.030948 | 2.292893  | -2.617855 |
| H | -4.331083 | 1.579991  | -2.208722 |
| H | -4.143128 | 3.111416  | -1.335090 |
| H | -3.646226 | 1.861483  | 0.766957  |
| H | -5.206236 | 1.341325  | 0.097871  |
| H | -1.796081 | 2.704857  | -0.908883 |
| N | -1.825400 | 0.667031  | -1.349331 |
| N | -3.660245 | -0.032985 | -0.133793 |

### 7d

|                                              |                    |
|----------------------------------------------|--------------------|
| M06-2X/6-31G(d) SCF energy in solution:      | -824.05963841 a.u. |
| M06-2X/6-31G(d) enthalpy in solution:        | -823.772718 a.u.   |
| M06-2X/6-31G(d) free energy in solution:     | -823.831969 a.u.   |
| M06-2X/6-311+G(d,p) SCF energy in solution:  | -824.30184827 a.u. |
| M06-2X/6-311+G(d,p) enthalpy in solution:    | -824.014928 a.u.   |
| M06-2X/6-311+G(d,p) free energy in solution: | -824.074179 a.u.   |

### Cartesian coordinates

| ATOM | X        | Y         | Z        |
|------|----------|-----------|----------|
| C    | 2.243485 | -2.506371 | 0.584194 |
| C    | 1.250146 | -1.548930 | 0.683464 |

|   |           |           |           |
|---|-----------|-----------|-----------|
| C | 1.407307  | -0.295019 | 0.059966  |
| C | 2.598390  | -0.040229 | -0.658064 |
| C | 3.592087  | -1.031387 | -0.742322 |
| C | 3.426105  | -2.258084 | -0.129762 |
| H | 2.099761  | -3.466428 | 1.071372  |
| H | 0.338746  | -1.745942 | 1.234058  |
| C | 2.750042  | 1.243686  | -1.289675 |
| H | 4.495981  | -0.808124 | -1.303910 |
| H | 4.196774  | -3.018913 | -0.198869 |
| C | 1.779694  | 2.171511  | -1.192290 |
| C | 0.538119  | 1.931735  | -0.449903 |
| H | 3.663661  | 1.444289  | -1.844974 |
| H | 1.862754  | 3.148621  | -1.655833 |
| O | -0.339349 | 2.782276  | -0.368692 |
| N | 0.410723  | 0.673710  | 0.146575  |
| C | -0.783522 | 0.400377  | 0.911956  |
| C | -0.677111 | 0.597113  | 2.311484  |
| H | -1.574791 | 0.361702  | 2.884669  |
| C | 0.405676  | 1.007730  | 3.026994  |
| H | 1.346502  | 1.272174  | 2.550783  |
| H | 0.355132  | 1.102213  | 4.106585  |
| C | -1.925762 | -0.060367 | 0.199864  |
| C | -3.182489 | -0.333092 | 0.821694  |
| C | -1.885112 | -0.297195 | -1.206432 |
| C | -4.271775 | -0.800845 | 0.104434  |
| C | -2.985637 | -0.764683 | -1.909844 |
| H | -0.960126 | -0.105694 | -1.743608 |
| C | -4.201308 | -1.029740 | -1.274030 |
| H | -2.890353 | -0.925950 | -2.981974 |
| H | -5.059891 | -1.394692 | -1.828465 |

|   |           |           |          |
|---|-----------|-----------|----------|
| H | -3.301412 | -0.165329 | 1.888000 |
| H | -5.203021 | -0.989356 | 0.635304 |

### 7e

|                                              |                    |
|----------------------------------------------|--------------------|
| M06-2X/6-31G(d) SCF energy in solution:      | -824.05962049 a.u. |
| M06-2X/6-31G(d) enthalpy in solution:        | -823.772723 a.u.   |
| M06-2X/6-31G(d) free energy in solution:     | -823.832390 a.u.   |
| M06-2X/6-311+G(d,p) SCF energy in solution:  | -824.30182688 a.u. |
| M06-2X/6-311+G(d,p) enthalpy in solution:    | -824.014929 a.u.   |
| M06-2X/6-311+G(d,p) free energy in solution: | -824.074596 a.u.   |

### Cartesian coordinates

| ATOM | X         | Y         | Z         |
|------|-----------|-----------|-----------|
| C    | -2.241643 | -2.506340 | 0.600288  |
| C    | -1.251503 | -1.545420 | 0.698173  |
| C    | -1.407502 | -0.296089 | 0.065019  |
| C    | -2.596899 | -0.048169 | -0.658349 |
| C    | -3.587594 | -1.042604 | -0.740609 |
| C    | -3.421123 | -2.265768 | -0.120864 |
| H    | -2.097827 | -3.462843 | 1.094519  |
| H    | -0.342524 | -1.736748 | 1.254984  |
| C    | -2.749154 | 1.231730  | -1.297743 |
| H    | -4.489683 | -0.825153 | -1.307297 |
| H    | -4.189197 | -3.029359 | -0.189004 |
| C    | -1.780902 | 2.162329  | -1.202773 |
| C    | -0.539233 | 1.928364  | -0.457998 |
| H    | -3.661741 | 1.427004  | -1.856783 |
| H    | -1.865109 | 3.136003  | -1.673016 |

|   |           |           |           |
|---|-----------|-----------|-----------|
| O | 0.339565  | 2.778079  | -0.383852 |
| N | -0.412185 | 0.674155  | 0.147273  |
| C | 0.783103  | 0.405047  | 0.912896  |
| C | 0.683376  | 0.624963  | 2.309483  |
| H | 1.585664  | 0.403354  | 2.880908  |
| C | -0.395365 | 1.045899  | 3.025457  |
| H | -1.340590 | 1.298747  | 2.551387  |
| H | -0.337341 | 1.160156  | 4.102735  |
| C | 1.923619  | -0.059984 | 0.200751  |
| C | 3.174355  | -0.354346 | 0.824580  |
| C | 1.886448  | -0.279405 | -1.208903 |
| C | 4.261446  | -0.825908 | 0.106534  |
| C | 2.984405  | -0.752665 | -1.912300 |
| H | 0.966290  | -0.072544 | -1.748120 |
| C | 4.194377  | -1.038241 | -1.274810 |
| H | 2.892163  | -0.900658 | -2.986612 |
| H | 5.051105  | -1.406521 | -1.829978 |
| H | 3.288270  | -0.204087 | 1.894002  |
| H | 5.188030  | -1.031413 | 0.639185  |

### DBU

|                                              |                    |
|----------------------------------------------|--------------------|
| M06-2X/6-31G(d) SCF energy in solution:      | -461.88371148 a.u. |
| M06-2X/6-31G(d) enthalpy in solution:        | -461.623627 a.u.   |
| M06-2X/6-31G(d) free energy in solution:     | -461.669292 a.u.   |
| M06-2X/6-311+G(d,p) SCF energy in solution:  | -462.01570567 a.u. |
| M06-2X/6-311+G(d,p) enthalpy in solution:    | -461.755621 a.u.   |
| M06-2X/6-311+G(d,p) free energy in solution: | -461.801286 a.u.   |

Cartesian coordinates

| ATOM | X         | Y         | Z         |
|------|-----------|-----------|-----------|
| C    | 0.850435  | 1.456868  | -0.270795 |
| C    | -0.368885 | -0.720510 | 0.136976  |
| C    | 2.111182  | 1.136810  | 0.531159  |
| C    | 0.925226  | -1.472730 | 0.402188  |
| C    | 2.947173  | 0.002200  | -0.066553 |
| C    | 2.078112  | -1.156200 | -0.559735 |
| H    | 1.066995  | 1.407473  | -1.350596 |
| H    | 1.246919  | -1.295789 | 1.436736  |
| H    | 1.814358  | 0.905299  | 1.560124  |
| H    | 3.650818  | -0.360885 | 0.691938  |
| H    | 0.566210  | 2.492173  | -0.061190 |
| H    | 2.720251  | 2.045470  | 0.582989  |
| H    | 0.647933  | -2.525611 | 0.333558  |
| H    | 3.549781  | 0.386691  | -0.897887 |
| H    | 2.697355  | -2.049626 | -0.688745 |
| H    | 1.667800  | -0.924676 | -1.550369 |
| C    | -1.582287 | 1.346715  | -0.297695 |
| C    | -2.775371 | 0.615134  | 0.290051  |
| C    | -2.720767 | -0.833990 | -0.169992 |
| H    | -3.479800 | -1.431256 | 0.348051  |
| H    | -2.723173 | 0.659022  | 1.384031  |
| H    | -3.704990 | 1.099759  | -0.023251 |
| H    | -1.683339 | 1.418863  | -1.392301 |
| H    | -1.524574 | 2.368212  | 0.092264  |
| H    | -2.961223 | -0.892864 | -1.241402 |
| N    | -1.423760 | -1.455262 | 0.059009  |
| N    | -0.339131 | 0.662686  | 0.055623  |



## DBU-H

|                                              |                    |
|----------------------------------------------|--------------------|
| M06-2X/6-31G(d) SCF energy in solution:      | -462.36299326 a.u. |
| M06-2X/6-31G(d) enthalpy in solution:        | -462.087978 a.u.   |
| M06-2X/6-31G(d) free energy in solution:     | -462.133940 a.u.   |
| M06-2X/6-311+G(d,p) SCF energy in solution:  | -462.49141710 a.u. |
| M06-2X/6-311+G(d,p) enthalpy in solution:    | -462.216402 a.u.   |
| M06-2X/6-311+G(d,p) free energy in solution: | -462.262364 a.u.   |

## Cartesian coordinates

| ATOM | X         | Y         | Z         |
|------|-----------|-----------|-----------|
| C    | 0.910069  | 1.498301  | -0.231305 |
| C    | -0.307007 | -0.664827 | 0.060458  |
| C    | 2.083288  | 1.093100  | 0.654450  |
| C    | 0.936199  | -1.500439 | 0.262316  |
| C    | 2.965503  | 0.006353  | 0.039283  |
| C    | 2.133178  | -1.100573 | -0.606163 |
| H    | 1.209797  | 1.554769  | -1.285006 |
| H    | 1.200847  | -1.465165 | 1.325893  |
| H    | 1.694745  | 0.782523  | 1.631049  |
| H    | 3.605784  | -0.419060 | 0.819817  |
| H    | 0.572708  | 2.492894  | 0.063102  |
| H    | 2.679760  | 1.992344  | 0.835056  |
| H    | 0.648760  | -2.532125 | 0.048867  |
| H    | 3.627382  | 0.447357  | -0.713648 |
| H    | 2.750941  | -1.987232 | -0.771654 |
| H    | 1.774983  | -0.785328 | -1.593007 |
| C    | -1.566880 | 1.339518  | -0.427209 |
| C    | -2.720109 | 0.702811  | 0.329007  |
| C    | -2.792354 | -0.769041 | -0.025674 |

|   |           |           |           |
|---|-----------|-----------|-----------|
| H | -3.442840 | -1.317907 | 0.657607  |
| H | -2.563792 | 0.825007  | 1.405250  |
| H | -3.653328 | 1.200725  | 0.058522  |
| H | -1.738806 | 1.307683  | -1.509253 |
| H | -1.444665 | 2.381752  | -0.131180 |
| H | -3.160018 | -0.911908 | -1.046637 |
| N | -1.450205 | -1.339503 | 0.082467  |
| N | -0.297397 | 0.645803  | -0.131304 |
| H | -1.380373 | -2.341650 | 0.216094  |

### TS-1d

|                                              |                    |
|----------------------------------------------|--------------------|
| M06-2X/6-31G(d) SCF energy in solution:      | -824.56465774 a.u. |
| M06-2X/6-31G(d) enthalpy in solution:        | -824.262859 a.u.   |
| M06-2X/6-31G(d) free energy in solution:     | -824.321042 a.u.   |
| M06-2X/6-311+G(d,p) SCF energy in solution:  | -824.79339958 a.u. |
| M06-2X/6-311+G(d,p) enthalpy in solution:    | -824.491601 a.u.   |
| M06-2X/6-311+G(d,p) free energy in solution: | -824.549784 a.u.   |
| Imaginary frequency:                         | -32.4851 cm-1      |

### Cartesian coordinates

| ATOM | X         | Y         | Z         |
|------|-----------|-----------|-----------|
| C    | 0.703388  | -2.983475 | -0.350154 |
| C    | 0.285826  | -1.673069 | -0.522584 |
| C    | 1.135805  | -0.597063 | -0.195927 |
| C    | 2.463149  | -0.907542 | 0.192984  |
| C    | 2.857356  | -2.244056 | 0.370290  |
| C    | 1.982905  | -3.285004 | 0.127340  |
| H    | 0.019568  | -3.784593 | -0.613655 |
| H    | -0.690371 | -1.497514 | -0.946591 |
| C    | 3.428825  | 0.155660  | 0.306625  |
| H    | 3.880494  | -2.438220 | 0.681060  |
| H    | 2.294324  | -4.315129 | 0.264072  |

|   |           |           |           |
|---|-----------|-----------|-----------|
| C | 3.105699  | 1.407575  | -0.058843 |
| C | 1.746208  | 1.753450  | -0.467878 |
| H | 4.434676  | -0.093176 | 0.635396  |
| H | 3.816370  | 2.226258  | -0.055938 |
| O | 1.442998  | 2.871689  | -0.862025 |
| N | 0.770034  | 0.753935  | -0.310828 |
| C | -0.612559 | 1.329810  | -0.240535 |
| H | -0.756220 | 1.900711  | -1.160829 |
| C | -0.682152 | 2.283386  | 0.936817  |
| H | -0.412373 | 1.855141  | 1.901568  |
| C | -1.095247 | 3.541380  | 0.844167  |
| H | -1.350626 | 3.983549  | -0.115846 |
| H | -1.188270 | 4.173765  | 1.722239  |
| C | -1.760371 | 0.349945  | -0.098962 |
| C | -1.968997 | -0.366659 | 1.085184  |
| C | -2.665310 | 0.201278  | -1.150227 |
| C | -3.043891 | -1.241261 | 1.197947  |
| C | -3.745988 | -0.672992 | -1.037414 |
| H | -2.514495 | 0.763940  | -2.067859 |
| C | -3.933903 | -1.400258 | 0.134747  |
| H | -4.439092 | -0.783613 | -1.865843 |
| H | -4.772254 | -2.084361 | 0.223786  |
| H | -1.272195 | -0.262659 | 1.912426  |
| H | -3.188205 | -1.801780 | 2.116560  |

## References

- [1] Rodrigues, A; Lee, E. E; Batey, R. A. *Org. Lett.* **2010**, 12, 260-263.
- [2] Bai, X. D; Wang, J; He, Y. *Adv. Synth. Catal.* **2018**, 361, 496-501.
- [3] Frisch, M. J.; Trucks, G. W.; Schlegel, H. B.; Scuseria, G. E.; Robb, M. A.; Cheeseman, J. R.; Scalmani, G.; Barone, V.; Mennucci, B.; Petersson, G. A.; Nakatsuji, H.; Caricato, M.; Li, X.; Hratchian, H. P.; Izmaylov, A. F.; Bloino, J.; Zheng, G.; Sonnenberg, J. L.; Hada, M.; Ehara, M.; Toyota, K.; Fukuda, R.; Hasegawa, J.; Ishida, M.; Nakajima, T.; Honda, Y.; Kitao, O.; Nakai, H.; Vreven, T.;

Montgomery, J. A., Jr.; ; Peralta, J. E.; Ogliaro, F.; Bearpark, M.; Heyd, J. J.; Brothers, E.; Kudin, K. N.; Staroverov, V. N.; Kobayashi, R.; Normand, J.; Raghavachari, K.; Rendell, A.; Burant, J. C.; Iyengar, S. S.; Tomasi, J.; Cossi, M.; Rega, N.; Millam, N. J.; Klene, M.; Knox, J. E.; Cross, J. B.; Bakken, V.; Adamo, C.; Jaramillo, J.; Gomperts, R.; Stratmann, R. E.; Yazyev, O.; Austin, A. J.; Cammi, R.; Pomelli, C.; Ochterski, J. W.; Martin, R. L.; Morokuma, K.; Zakrzewski, V. G.; Voth, G. A.; Salvador, P.; Dannenberg, J. J.; Dapprich, S.; Daniels, A. D.; Farkas, O.; Foresman, J. B.; Ortiz, J. V.; Cioslowski, J.; Fox, D. J. *Gaussian 16*, Revision A.03; Gaussian, Inc.: Wallingford, CT, 2016.

[4] Towns, J.; Cockerill, T.; Dahan, M.; Foster, I.; Gaither, K.; Grimshaw, A.; Hazlewood, V.; Lathrop, S.; Lifka, D.; Peterson, G. D.; Roskies, R.; Scott, J. R.; Wilkins-Diehr, N. XSEDE: Accelerating Scientific Discovery. *Computing in Science & Engineering* **2014**, *16*, 62-74.

[5] Marenich, A. V.; Cramer, C. J.; Truhlar, D. G. Universal solvation model based on solute electron density and on a continuum model of the solvent defined by the bulk dielectric constant and atomic surface tensions. *J. Phys. Chem. B* **2009**, *113*, 6378-6396.

[6] Zhao, Y.; Truhlar, D. G. The M06 suite of density functionals for main group thermochemistry, thermochemical kinetics, noncovalent interactions, excited states, and transition elements: two new functionals and systematic testing of four M06-class functionals and 12 other functionals. *Theor. Chem. Acc.* **2007**, *120*, 215-241.

[7] Johnson, E. R.; Keinan, S.; Mori-Sanchez, P.; Contreras-Garcia, J.; Cohen, A. J.; and Yang, W. Revealing noncovalent interactions. *J. Am. Chem. Soc.* **2010**, *132*, 6498-6506.

[8] Ascough, D. M. H.; Duarte, F.; Paton, R. S. Stereospecific 1,3-H Transfer of Indenols Proceeds via Persistent Ion-Pairs Anchored by NH $\cdots\pi$  Interactions. *J. Am. Chem. Soc.* **2018**, *140*, 16740.

## X-ray structures of 3f

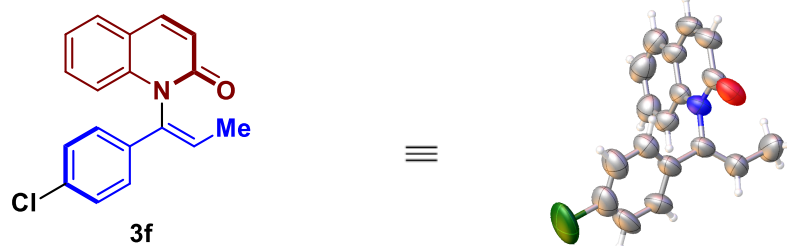

**Table 1 Crystal data and structure refinement for 1941459.**

|                                             |                                                               |
|---------------------------------------------|---------------------------------------------------------------|
| Identification code                         | 1941459                                                       |
| Empirical formula                           | C <sub>18</sub> H <sub>14</sub> ClNO                          |
| Formula weight                              | 295.75                                                        |
| Temperature/K                               | 173(2)                                                        |
| Crystal system                              | orthorhombic                                                  |
| Space group                                 | P2 <sub>1</sub> 2 <sub>1</sub> 2 <sub>1</sub>                 |
| a/Å                                         | 7.1789(9)                                                     |
| b/Å                                         | 8.6698(11)                                                    |
| c/Å                                         | 24.751(3)                                                     |
| α/°                                         | 90                                                            |
| β/°                                         | 90                                                            |
| γ/°                                         | 90                                                            |
| Volume/Å <sup>3</sup>                       | 1540.5(3)                                                     |
| Z                                           | 4                                                             |
| ρ <sub>calc</sub> /cm <sup>3</sup>          | 1.275                                                         |
| μ/mm <sup>-1</sup>                          | 1.429                                                         |
| F(000)                                      | 616.0                                                         |
| Crystal size/mm <sup>3</sup>                | 0.170 × 0.160 × 0.110                                         |
| Radiation                                   | GaKα (λ = 1.34139)                                            |
| 2θ range for data collection/°              | 6.214 to 105.996                                              |
| Index ranges                                | -8 ≤ h ≤ 8, -10 ≤ k ≤ 10, -29 ≤ l ≤ 29                        |
| Reflections collected                       | 20404                                                         |
| Independent reflections                     | 2719 [R <sub>int</sub> = 0.0838, R <sub>sigma</sub> = 0.0474] |
| Data/restraints/parameters                  | 2719/0/192                                                    |
| Goodness-of-fit on F <sup>2</sup>           | 1.169                                                         |
| Final R indexes [I ≥ 2σ (I)]                | R <sub>1</sub> = 0.0874, wR <sub>2</sub> = 0.1737             |
| Final R indexes [all data]                  | R <sub>1</sub> = 0.1141, wR <sub>2</sub> = 0.1863             |
| Largest diff. peak/hole / e Å <sup>-3</sup> | 0.20/-0.19                                                    |
| Flack parameter                             | 0.18(2)                                                       |

**Table 2 Fractional Atomic Coordinates ( $\times 10^4$ ) and Equivalent Isotropic Displacement Parameters ( $\text{\AA}^2 \times 10^3$ ) for 1941459.  $U_{eq}$  is defined as 1/3 of the trace of the orthogonalised  $U_{ij}$  tensor.**

| Atom | <i>x</i> | <i>y</i> | <i>z</i>   | $U_{eq}$ |
|------|----------|----------|------------|----------|
| C1   | 4634(15) | 5253(13) | 2522(3)    | 101(3)   |
| C2   | 3405(19) | 5126(16) | 2090(3)    | 121(4)   |
| C3   | 1886(18) | 4221(16) | 2129(4)    | 115(4)   |
| C4   | 1575(16) | 3449(13) | 2596(4)    | 107(3)   |
| C5   | 2749(13) | 3561(11) | 3028(3)    | 85(3)    |
| C6   | 4337(13) | 4432(12) | 2993(3)    | 82(2)    |
| C7   | 5617(12) | 4596(10) | 3454(3)    | 74(2)    |
| C8   | 7485(13) | 4687(12) | 3409(3)    | 96(3)    |
| C9   | 8823(13) | 4870(15) | 3865(3)    | 124(4)   |
| C10  | 4719(13) | 3130(13) | 4257(3)    | 86(3)    |
| C11  | 3768(13) | 3159(14) | 4769(3)    | 99(3)    |
| C12  | 2983(13) | 4485(16) | 4972(3)    | 103(3)   |
| C13  | 3056(12) | 5870(13) | 4685(3)    | 82(3)    |
| C14  | 2318(13) | 7238(15) | 4889(4)    | 99(3)    |
| C15  | 2466(14) | 8592(15) | 4618(4)    | 109(3)   |
| C16  | 3408(12) | 8624(12) | 4117(4)    | 92(3)    |
| C17  | 4123(11) | 7307(11) | 3900(3)    | 77(2)    |
| C18  | 4006(10) | 5934(11) | 4185(3)    | 75(2)    |
| Cl1  | 369(5)   | 4109(6)  | 1592.5(12) | 186(2)   |
| N1   | 4744(9)  | 4545(9)  | 3980(2)    | 75.6(18) |
| O1   | 5418(11) | 1994(8)  | 4057(2)    | 108(2)   |

**Table 3 Anisotropic Displacement Parameters ( $\text{\AA}^2 \times 10^3$ ) for 1941459. The Anisotropic displacement factor exponent takes the form:**

$$-2\pi^2[h^2a^{*2}U_{11}+2hka^*b^*U_{12}+...].$$

| Atom | $U_{11}$ | $U_{22}$ | $U_{33}$ | $U_{23}$ | $U_{13}$ | $U_{12}$ |
|------|----------|----------|----------|----------|----------|----------|
| C1   | 108(7)   | 145(9)   | 50(4)    | 11(5)    | 5(4)     | 2(7)     |
| C2   | 144(10)  | 170(12)  | 47(4)    | 9(6)     | -18(6)   | 32(9)    |
| C3   | 113(8)   | 156(11)  | 76(6)    | -29(7)   | -30(6)   | 20(8)    |
| C4   | 119(8)   | 123(9)   | 80(6)    | -15(6)   | -31(6)   | 12(7)    |
| C5   | 95(6)    | 94(6)    | 65(5)    | -3(4)    | -10(4)   | -1(6)    |
| C6   | 88(6)    | 115(7)   | 44(4)    | 3(4)     | -3(4)    | 18(6)    |
| C7   | 87(5)    | 92(6)    | 44(3)    | 0(4)     | 0(3)     | 6(5)     |
| C8   | 83(6)    | 145(9)   | 60(4)    | 1(5)     | -6(4)    | 12(6)    |
| C9   | 76(6)    | 211(13)  | 84(6)    | -18(7)   | -11(5)   | -3(7)    |

|     |        |         |        |        |        |        |
|-----|--------|---------|--------|--------|--------|--------|
| C10 | 95(6)  | 117(8)  | 45(4)  | 1(4)   | -13(4) | -6(6)  |
| C11 | 104(7) | 139(9)  | 53(5)  | 18(5)  | -1(5)  | -3(7)  |
| C12 | 83(6)  | 181(11) | 45(4)  | 4(6)   | 2(4)   | -16(7) |
| C13 | 75(5)  | 124(8)  | 47(4)  | -8(5)  | -1(4)  | -10(5) |
| C14 | 79(6)  | 141(10) | 76(6)  | -15(6) | -3(5)  | 0(7)   |
| C15 | 86(7)  | 139(10) | 101(7) | -35(7) | 0(6)   | 7(7)   |
| C16 | 79(6)  | 100(7)  | 98(6)  | -6(6)  | -7(5)  | 1(5)   |
| C17 | 77(5)  | 99(7)   | 56(4)  | -11(4) | 0(4)   | -9(5)  |
| C18 | 62(4)  | 118(7)  | 46(4)  | 0(4)   | -9(3)  | -7(5)  |
| C11 | 177(3) | 268(5)  | 112(2) | -44(3) | -90(2) | 56(3)  |
| N1  | 84(4)  | 98(5)   | 44(3)  | 2(3)   | -2(3)  | 0(4)   |
| O1  | 146(6) | 110(5)  | 67(4)  | 5(4)   | -19(4) | 18(5)  |

**Table 4 Bond Lengths for 1941459.**

| Atom | Atom | Length/Å  | Atom | Atom | Length/Å  |
|------|------|-----------|------|------|-----------|
| C1   | C2   | 1.390(13) | C10  | C11  | 1.439(11) |
| C1   | C6   | 1.383(11) | C10  | N1   | 1.405(11) |
| C2   | C3   | 1.347(15) | C11  | C12  | 1.375(14) |
| C3   | C4   | 1.356(14) | C12  | C13  | 1.395(14) |
| C3   | C11  | 1.720(9)  | C13  | C14  | 1.394(13) |
| C4   | C5   | 1.364(11) | C13  | C18  | 1.415(10) |
| C5   | C6   | 1.370(12) | C14  | C15  | 1.356(14) |
| C6   | C7   | 1.471(10) | C15  | C16  | 1.411(13) |
| C7   | C8   | 1.348(11) | C16  | C17  | 1.363(11) |
| C7   | N1   | 1.447(9)  | C17  | C18  | 1.387(11) |
| C8   | C9   | 1.490(11) | C18  | N1   | 1.410(10) |
| C10  | O1   | 1.212(10) |      |      |           |

**Table 5 Bond Angles for 1941459.**

| Atom | Atom | Atom | Angle/°   | Atom | Atom | Atom | Angle/°   |
|------|------|------|-----------|------|------|------|-----------|
| C2   | C1   | C6   | 120.7(10) | C11  | C10  | N1   | 114.8(9)  |
| C3   | C2   | C1   | 120.3(10) | C12  | C11  | C10  | 122.0(10) |
| C2   | C3   | C4   | 118.8(9)  | C11  | C12  | C13  | 121.2(8)  |
| C2   | C3   | C11  | 119.4(10) | C14  | C13  | C18  | 117.8(10) |
| C4   | C3   | C11  | 121.8(11) | C14  | C13  | C12  | 122.3(8)  |
| C5   | C4   | C3   | 122.1(11) | C18  | C13  | C12  | 119.8(9)  |
| C4   | C5   | C6   | 120.3(9)  | C15  | C14  | C13  | 121.9(9)  |

|    |     |     |           |     |     |     |           |
|----|-----|-----|-----------|-----|-----|-----|-----------|
| C1 | C6  | C5  | 117.7(8)  | C14 | C15 | C16 | 119.3(11) |
| C1 | C6  | C7  | 120.5(9)  | C17 | C16 | C15 | 120.7(10) |
| C5 | C6  | C7  | 121.7(7)  | C16 | C17 | C18 | 119.7(8)  |
| C8 | C7  | N1  | 120.4(7)  | C17 | C18 | C13 | 120.6(9)  |
| C8 | C7  | C6  | 124.3(7)  | C17 | C18 | N1  | 121.8(6)  |
| N1 | C7  | C6  | 115.1(7)  | C13 | C18 | N1  | 117.5(8)  |
| C7 | C8  | C9  | 125.9(8)  | C7  | N1  | C10 | 118.1(7)  |
| O1 | C10 | C11 | 124.8(10) | C7  | N1  | C18 | 117.4(7)  |
| O1 | C10 | N1  | 120.4(8)  | C10 | N1  | C18 | 124.4(6)  |

**Table 6 Hydrogen Atom Coordinates ( $\text{\AA} \times 10^4$ ) and Isotropic Displacement Parameters ( $\text{\AA}^2 \times 10^3$ ) for 1941459.**

| Atom | <i>x</i> | <i>y</i> | <i>z</i> | U(eq) |
|------|----------|----------|----------|-------|
| H1   | 5687.64  | 5910.25  | 2493.18  | 121   |
| H2   | 3638.9   | 5679.6   | 1766.06  | 145   |
| H4   | 504.61   | 2808.99  | 2624.52  | 129   |
| H5   | 2464.38  | 3032.7   | 3353.66  | 102   |
| H8   | 7993.68  | 4629.39  | 3055.69  | 115   |
| H9A  | 8139.82  | 5130.24  | 4195.27  | 185   |
| H9B  | 9705.44  | 5698.04  | 3780.19  | 185   |
| H9C  | 9504.04  | 3902.64  | 3918.53  | 185   |
| H11  | 3680.37  | 2233.64  | 4972.9   | 118   |
| H12  | 2380.13  | 4457.4   | 5313.33  | 124   |
| H14  | 1692.82  | 7222.39  | 5227.16  | 118   |
| H15  | 1941.72  | 9508.13  | 4762.83  | 130   |
| H16  | 3545.08  | 9574.45  | 3930.14  | 111   |
| H17  | 4698.48  | 7329.78  | 3554.06  | 93    |



## X-ray structures of 8c

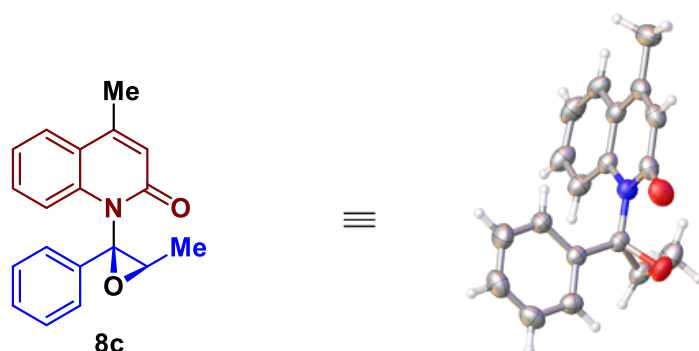

**Table 1 Crystal data and structure refinement for 1960857**

|                                             |                                                               |
|---------------------------------------------|---------------------------------------------------------------|
| Identification code                         | 1960857                                                       |
| Empirical formula                           | C <sub>19</sub> H <sub>17</sub> NO <sub>2</sub>               |
| Formula weight                              | 291.33                                                        |
| Temperature/K                               | 193(2)                                                        |
| Crystal system                              | monoclinic                                                    |
| Space group                                 | P2 <sub>1</sub>                                               |
| a/Å                                         | 8.9647(3)                                                     |
| b/Å                                         | 9.7465(4)                                                     |
| c/Å                                         | 9.2350(3)                                                     |
| α/°                                         | 90                                                            |
| β/°                                         | 110.2250(10)                                                  |
| γ/°                                         | 90                                                            |
| Volume/Å <sup>3</sup>                       | 757.15(5)                                                     |
| Z                                           | 2                                                             |
| ρ <sub>calc</sub> /cm <sup>3</sup>          | 1.278                                                         |
| μ/mm <sup>-1</sup>                          | 0.420                                                         |
| F(000)                                      | 308.0                                                         |
| Crystal size/mm <sup>3</sup>                | 0.120 × 0.110 × 0.090                                         |
| Radiation                                   | GaKα (λ = 1.34139)                                            |
| 2θ range for data collection/°              | 18.17 to 107.918                                              |
| Index ranges                                | -10 ≤ h ≤ 10, -11 ≤ k ≤ 11, -11 ≤ l ≤ 11                      |
| Reflections collected                       | 12804                                                         |
| Independent reflections                     | 2691 [R <sub>int</sub> = 0.0306, R <sub>sigma</sub> = 0.0228] |
| Data/restraints/parameters                  | 2691/1/201                                                    |
| Goodness-of-fit on F <sup>2</sup>           | 1.068                                                         |
| Final R indexes [I >= 2σ (I)]               | R <sub>1</sub> = 0.0261, wR <sub>2</sub> = 0.0734             |
| Final R indexes [all data]                  | R <sub>1</sub> = 0.0263, wR <sub>2</sub> = 0.0737             |
| Largest diff. peak/hole / e Å <sup>-3</sup> | 0.12/-0.11                                                    |
| Flack parameter                             | 0.10(7)                                                       |

**Table 2 Fractional Atomic Coordinates ( $\times 10^4$ ) and Equivalent Isotropic Displacement Parameters ( $\text{\AA}^2 \times 10^3$ ) for 20191017ZH\_LMF\_2KL\_0m\_a.  $U_{eq}$  is defined as 1/3 of the trace of the orthogonalised  $U_{ij}$  tensor.**

| Atom | x          | y          | z          | U(eq)   |
|------|------------|------------|------------|---------|
| C1   | 5446.9(19) | 3251.9(17) | 842.6(18)  | 40.8(4) |
| C2   | 6874(2)    | 3591(2)    | 658(2)     | 50.0(4) |
| C3   | 7686(2)    | 4746(2)    | 1342(2)    | 54.8(5) |
| C4   | 7096(2)    | 5566(2)    | 2229(2)    | 54.0(4) |
| C5   | 5684.7(19) | 5223.4(17) | 2442.1(19) | 42.0(4) |
| C6   | 4840.4(18) | 4065.7(16) | 1738.1(16) | 33.6(3) |
| C7   | 3286.1(18) | 3698.1(16) | 1909.6(17) | 34.5(3) |
| C8   | 2835(2)    | 2258.3(18) | 2068.4(19) | 42.6(4) |
| C9   | 1636(2)    | 1822(2)    | 2774(2)    | 55.0(5) |
| C10  | 2893.9(18) | 4894.7(16) | 4116.3(17) | 35.2(3) |
| C11  | 3919(2)    | 3973.9(17) | 5148.0(18) | 42.4(4) |
| C12  | 4134(2)    | 4060(2)    | 6705(2)    | 50.3(4) |
| C13  | 3365(3)    | 5043(2)    | 7260(2)    | 54.0(5) |
| C14  | 2426(2)    | 5991(2)    | 6263(2)    | 47.7(4) |
| C15  | 2183.7(18) | 5961.9(17) | 4672.6(18) | 38.4(3) |
| C16  | 1267.4(18) | 6997.5(17) | 3607(2)    | 42.4(4) |
| C17  | 1099.9(19) | 6903.4(19) | 2108(2)    | 44.0(4) |
| C18  | 1773.1(17) | 5804.2(18) | 1477.9(18) | 38.8(3) |
| C19  | 545(3)     | 8174(2)    | 4182(3)    | 61.1(5) |
| N1   | 2577.6(15) | 4787.5(13) | 2522.6(14) | 34.4(3) |
| O1   | 2204.9(14) | 2988.5(13) | 628.7(12)  | 44.6(3) |
| O2   | 1672.5(15) | 5726.6(14) | 120.5(13)  | 51.2(3) |

**Table 3 Anisotropic Displacement Parameters ( $\text{\AA}^2 \times 10^3$ ) for 20191017ZH\_LMF\_2KL\_0m\_a. The Anisotropic displacement factor exponent takes the form:  $-2\pi^2[h^2a^{*2}U_{11}+2hka^*b^*U_{12}+\dots]$ .**

| Atom | U <sub>11</sub> | U <sub>22</sub> | U <sub>33</sub> | U <sub>23</sub> | U <sub>13</sub> | U <sub>12</sub> |
|------|-----------------|-----------------|-----------------|-----------------|-----------------|-----------------|
| C1   | 47.4(8)         | 39.0(8)         | 35.8(7)         | 0.4(6)          | 14.1(6)         | 3.0(7)          |
| C2   | 50.8(9)         | 56.3(11)        | 48.7(9)         | 4.0(8)          | 24.7(8)         | 10.4(8)         |
| C3   | 38.7(9)         | 64.5(12)        | 64.4(12)        | 8.2(9)          | 22.0(8)         | 1.1(8)          |
| C4   | 42.8(9)         | 51.3(10)        | 66.3(12)        | -4.6(8)         | 16.9(8)         | -9.5(7)         |
| C5   | 40.4(8)         | 39.4(8)         | 45.6(8)         | -5.8(7)         | 13.9(7)         | -2.7(7)         |
| C6   | 36.4(7)         | 33.1(7)         | 29.0(7)         | 3.1(5)          | 8.3(6)          | 1.2(6)          |
| C7   | 36.8(7)         | 35.9(8)         | 28.1(7)         | -1.6(6)         | 7.7(5)          | -2.9(6)         |
| C8   | 48.3(9)         | 37.8(9)         | 38.7(8)         | -3.3(6)         | 11.3(7)         | -8.8(7)         |

|     |          |          |          |           |          |          |
|-----|----------|----------|----------|-----------|----------|----------|
| C9  | 60.1(10) | 53.6(11) | 50.6(10) | -1.9(8)   | 18.1(8)  | -21.8(9) |
| C10 | 37.3(7)  | 36.2(8)  | 32.4(7)  | -2.1(6)   | 12.5(6)  | -7.6(6)  |
| C11 | 51.8(9)  | 37.5(9)  | 34.9(8)  | -0.6(6)   | 11.3(7)  | -3.4(7)  |
| C12 | 65.5(11) | 45.6(9)  | 34.1(8)  | 0.9(7)    | 10.0(7)  | -8.8(8)  |
| C13 | 70.5(11) | 58.6(11) | 32.3(8)  | -8.6(8)   | 17.0(8)  | -19.4(9) |
| C14 | 52.9(9)  | 50.3(9)  | 44.7(9)  | -15.1(8)  | 22.8(7)  | -13.4(8) |
| C15 | 37.4(7)  | 38.9(8)  | 40.5(8)  | -5.4(6)   | 15.4(6)  | -9.4(6)  |
| C16 | 34.4(7)  | 39.7(8)  | 55.1(9)  | -4.8(7)   | 18.0(7)  | -4.2(6)  |
| C17 | 35.0(7)  | 42.7(9)  | 53.7(9)  | 9.0(7)    | 14.5(7)  | 4.1(7)   |
| C18 | 33.7(7)  | 44.4(9)  | 37.1(8)  | 7.2(6)    | 10.4(6)  | 0.4(6)   |
| C19 | 54.5(10) | 50.6(11) | 82.4(14) | -12.4(10) | 29.1(10) | 3.3(9)   |
| N1  | 36.5(6)  | 36.0(7)  | 30.2(6)  | 2.3(5)    | 11.0(5)  | 1.2(5)   |
| O1  | 46.1(6)  | 49.7(7)  | 33.8(5)  | -7.0(5)   | 8.2(5)   | -11.6(5) |
| O2  | 53.5(7)  | 62.3(8)  | 36.9(6)  | 12.5(5)   | 14.4(5)  | 9.5(6)   |

**Table 4 Bond Lengths for 20191017ZH\_LMF\_2KL\_0m\_a.**

| Atom | Atom | Length/Å   | Atom | Atom | Length/Å   |
|------|------|------------|------|------|------------|
| C1   | C6   | 1.385(2)   | C10  | N1   | 1.4031(18) |
| C1   | C2   | 1.388(3)   | C10  | C15  | 1.406(2)   |
| C2   | C3   | 1.371(3)   | C11  | C12  | 1.386(2)   |
| C3   | C4   | 1.374(3)   | C12  | C13  | 1.378(3)   |
| C4   | C5   | 1.387(3)   | C13  | C14  | 1.369(3)   |
| C5   | C6   | 1.389(2)   | C14  | C15  | 1.408(2)   |
| C6   | C7   | 1.499(2)   | C15  | C16  | 1.450(2)   |
| C7   | O1   | 1.4228(18) | C16  | C17  | 1.343(3)   |
| C7   | N1   | 1.449(2)   | C16  | C19  | 1.501(2)   |
| C7   | C8   | 1.482(2)   | C17  | C18  | 1.447(2)   |
| C8   | O1   | 1.440(2)   | C18  | O2   | 1.228(2)   |
| C8   | C9   | 1.498(3)   | C18  | N1   | 1.397(2)   |
| C10  | C11  | 1.397(2)   |      |      |            |

**Table 5 Bond Angles for 20191017ZH\_LMF\_2KL\_0m\_a.**

| Atom | Atom | Atom | Angle/°    | Atom | Atom | Atom | Angle/°    |
|------|------|------|------------|------|------|------|------------|
| C6   | C1   | C2   | 120.37(16) | N1   | C10  | C15  | 119.04(14) |
| C3   | C2   | C1   | 120.31(17) | C12  | C11  | C10  | 119.46(16) |
| C4   | C3   | C2   | 119.95(16) | C13  | C12  | C11  | 121.30(18) |
| C3   | C4   | C5   | 120.21(18) | C14  | C13  | C12  | 119.28(16) |

|     |     |     |            |     |     |     |            |
|-----|-----|-----|------------|-----|-----|-----|------------|
| C4  | C5  | C6  | 120.34(16) | C13 | C14 | C15 | 121.70(17) |
| C1  | C6  | C5  | 118.81(14) | C14 | C15 | C10 | 117.99(16) |
| C1  | C6  | C7  | 119.81(14) | C14 | C15 | C16 | 122.73(16) |
| C5  | C6  | C7  | 121.38(14) | C10 | C15 | C16 | 119.26(14) |
| O1  | C7  | N1  | 114.60(13) | C17 | C16 | C15 | 119.15(15) |
| O1  | C7  | C8  | 59.41(10)  | C17 | C16 | C19 | 120.56(17) |
| N1  | C7  | C8  | 118.94(13) | C15 | C16 | C19 | 120.27(16) |
| O1  | C7  | C6  | 114.79(13) | C16 | C17 | C18 | 123.48(16) |
| N1  | C7  | C6  | 114.52(13) | O2  | C18 | N1  | 119.98(15) |
| C8  | C7  | C6  | 122.15(14) | O2  | C18 | C17 | 124.24(15) |
| O1  | C8  | C7  | 58.26(10)  | N1  | C18 | C17 | 115.78(14) |
| O1  | C8  | C9  | 115.48(15) | C18 | N1  | C10 | 122.71(13) |
| C7  | C8  | C9  | 124.98(16) | C18 | N1  | C7  | 116.18(12) |
| C11 | C10 | N1  | 120.95(14) | C10 | N1  | C7  | 120.49(12) |
| C11 | C10 | C15 | 120.00(14) | C7  | O1  | C8  | 62.33(10)  |

**Table 6 Hydrogen Atom Coordinates ( $\text{\AA} \times 10^4$ ) and Isotropic Displacement Parameters ( $\text{\AA}^2 \times 10^3$ ) for 20191017ZH\_LMF\_2KL\_0m\_a.**

| Atom | x       | y       | z       | U(eq) |
|------|---------|---------|---------|-------|
| H1   | 4882.8  | 2457.04 | 352.42  | 49    |
| H2   | 7289.21 | 3020.28 | 54.46   | 60    |
| H3   | 8656.58 | 4980.4  | 1202.65 | 66    |
| H4   | 7656.96 | 6368.84 | 2697.17 | 65    |
| H5   | 5293.4  | 5783.94 | 3073.23 | 50    |
| H8   | 3666.77 | 1559.24 | 2114.2  | 51    |
| H9A  | 979.81  | 2610.77 | 2828.61 | 83    |
| H9B  | 2186.7  | 1467.67 | 3815.87 | 83    |
| H9C  | 957.23  | 1101.64 | 2138.54 | 83    |
| H11  | 4463.43 | 3294.59 | 4784.95 | 51    |
| H12  | 4825.09 | 3428.32 | 7404.04 | 60    |
| H13  | 3485.29 | 5062.03 | 8323.03 | 65    |
| H14  | 1925.57 | 6685.67 | 6653.27 | 57    |
| H17  | 507.96  | 7595.25 | 1425.32 | 53    |
| H19A | -25.02  | 8773.16 | 3315.23 | 92    |
| H19B | 1387.87 | 8697.06 | 4947.06 | 92    |
| H19C | -197.78 | 7819.86 | 4659.37 | 92    |

# Spectral Data

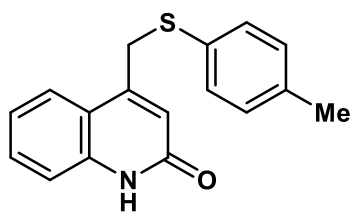

**2x**

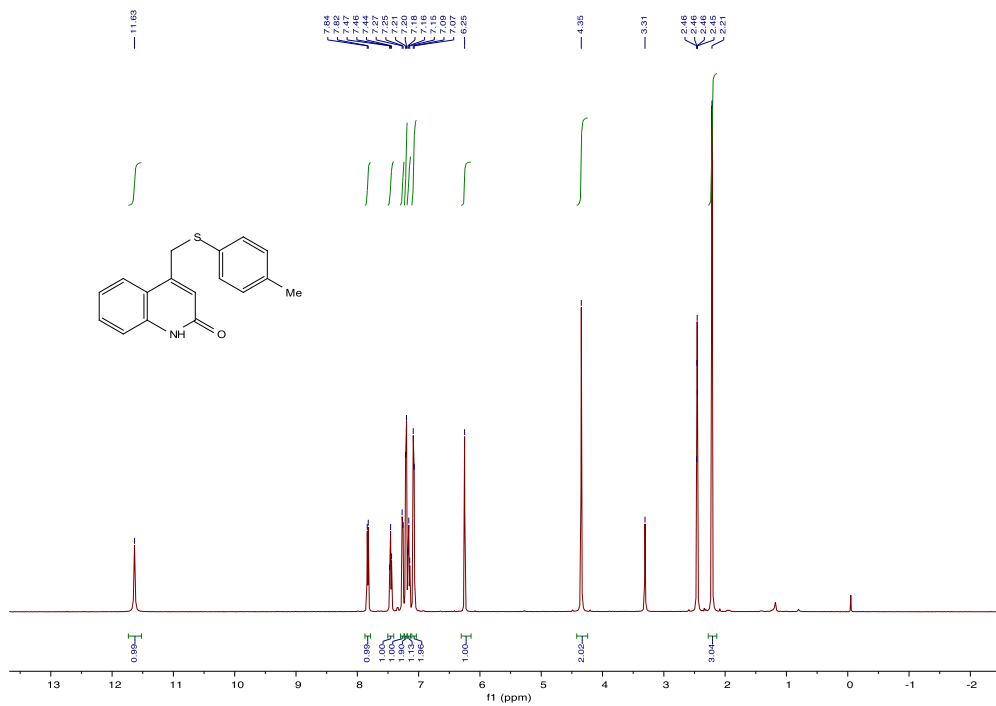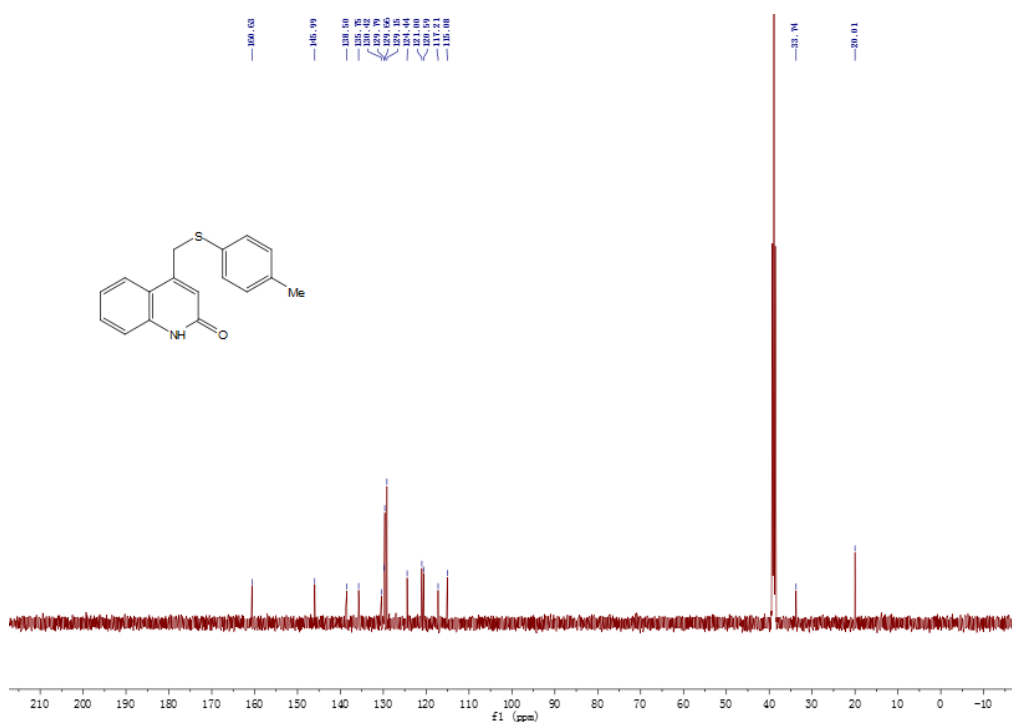

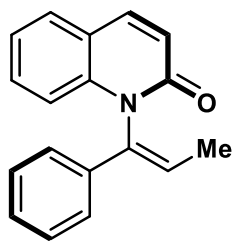

3a

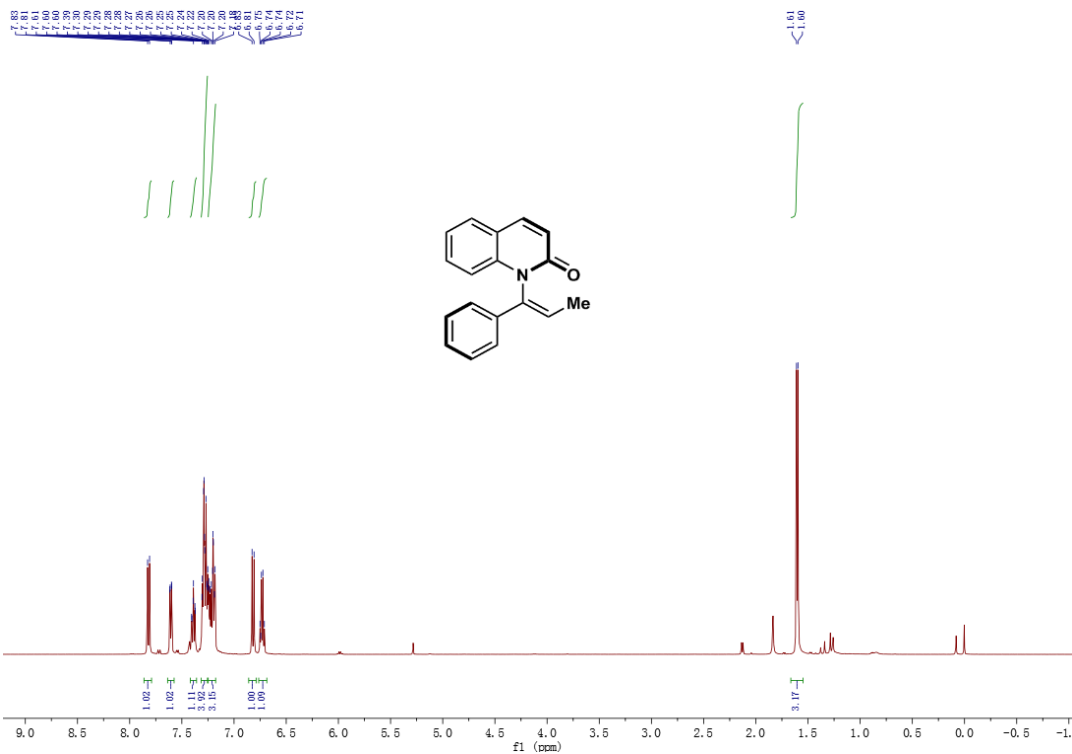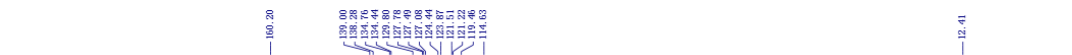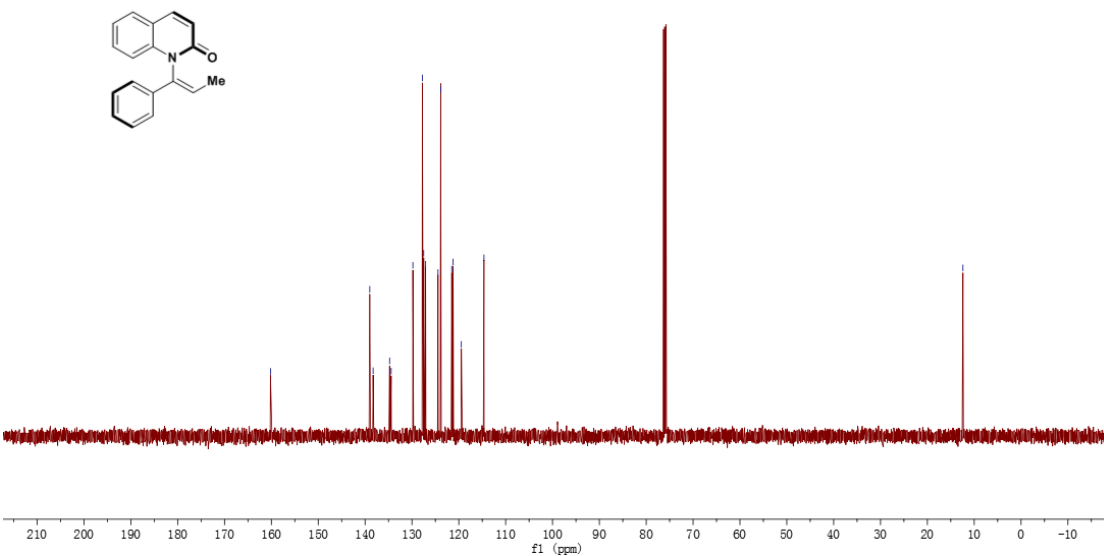

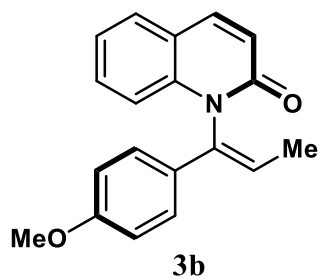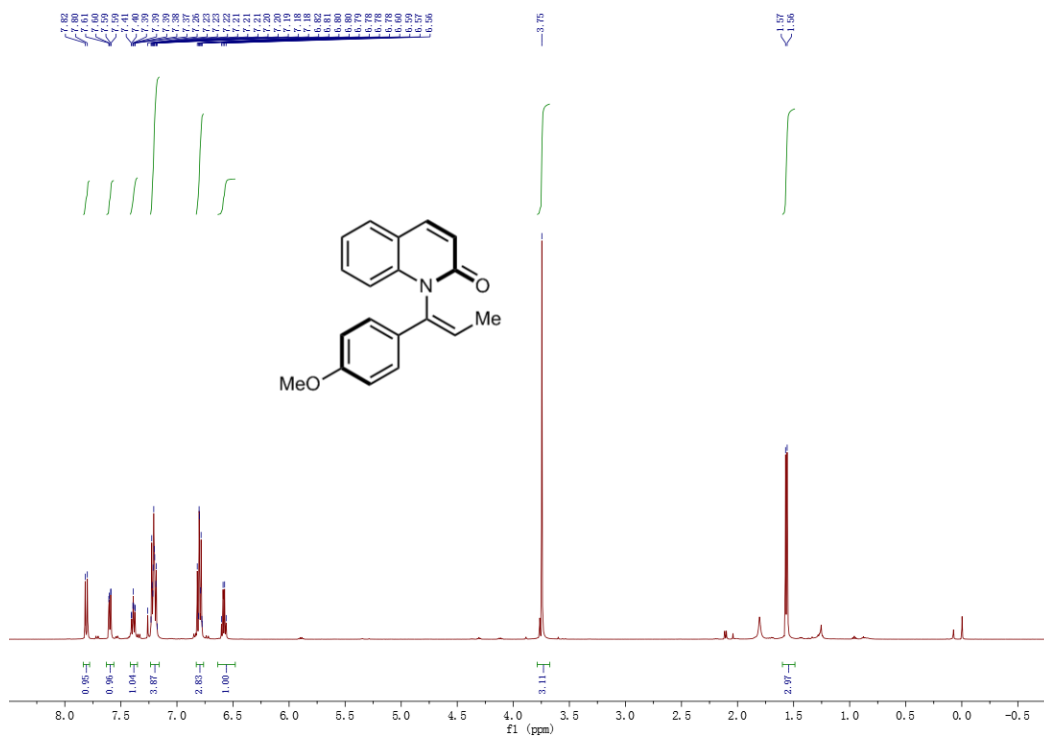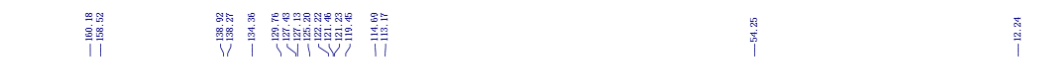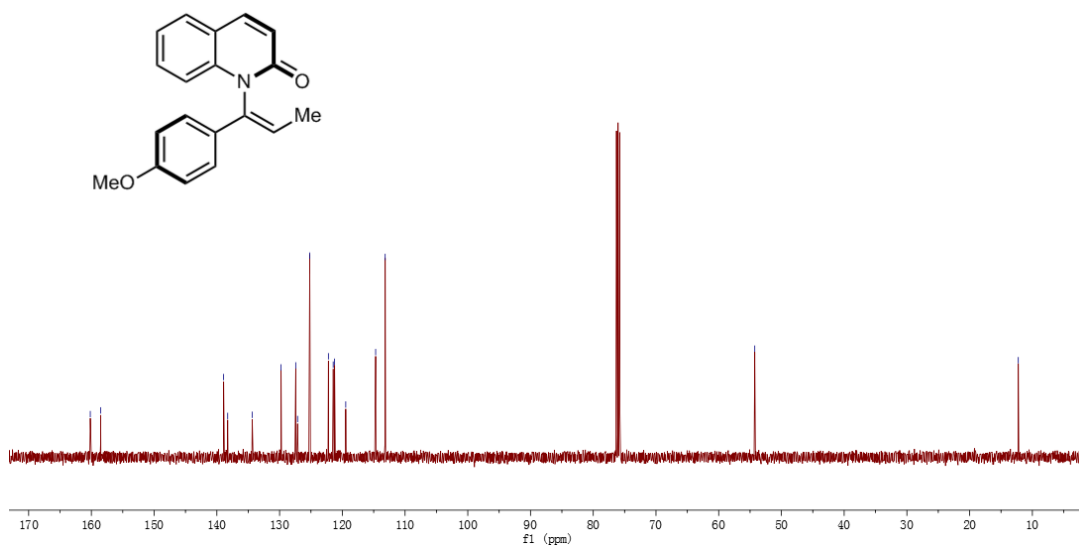

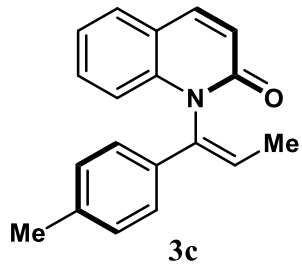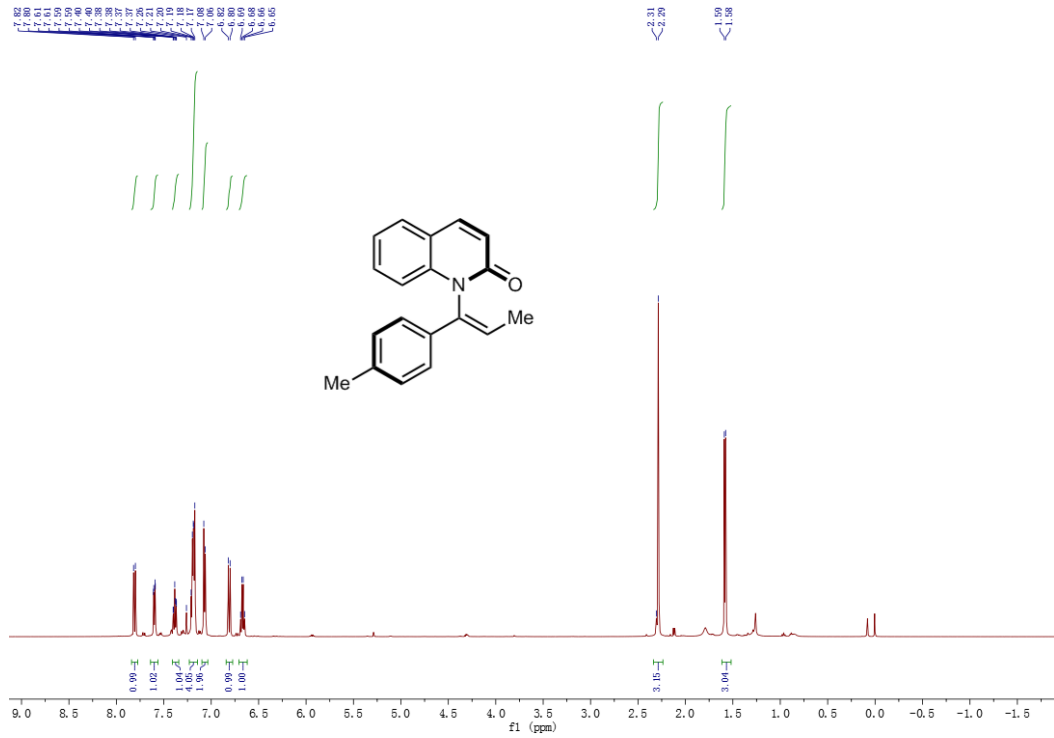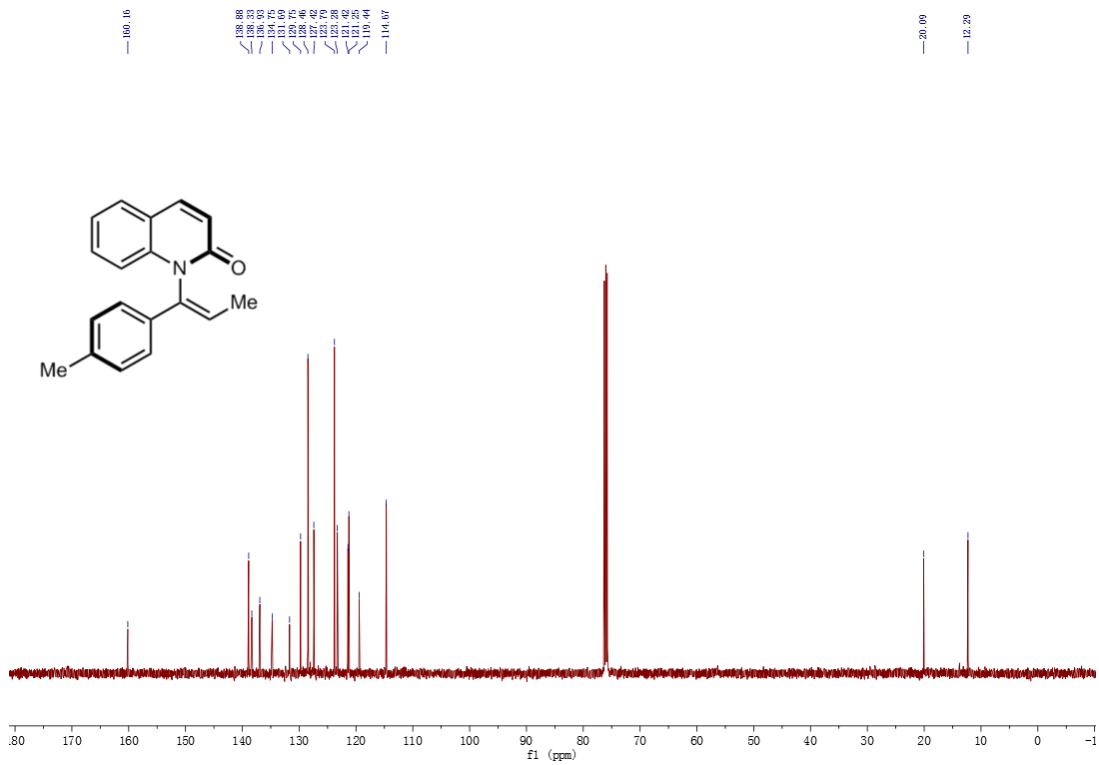





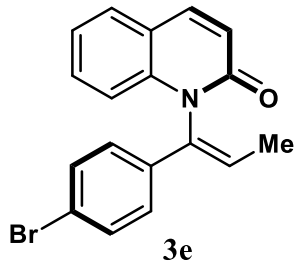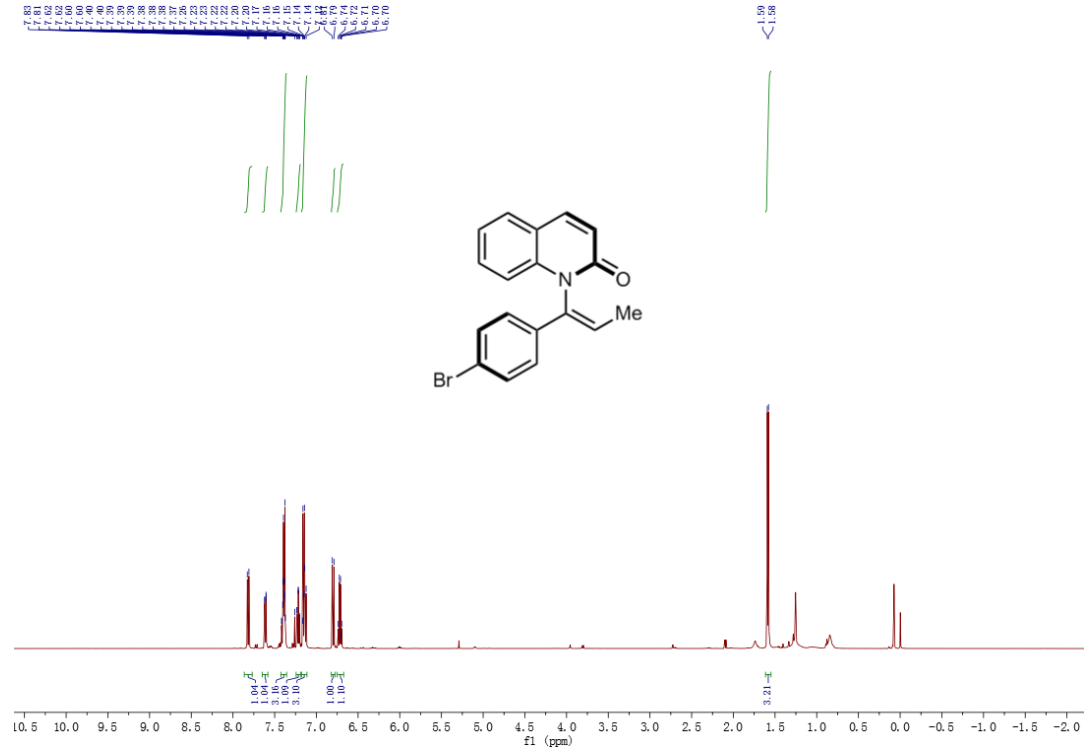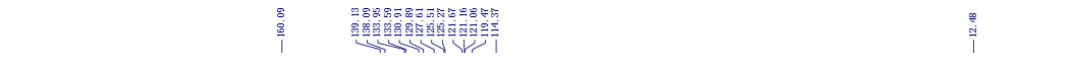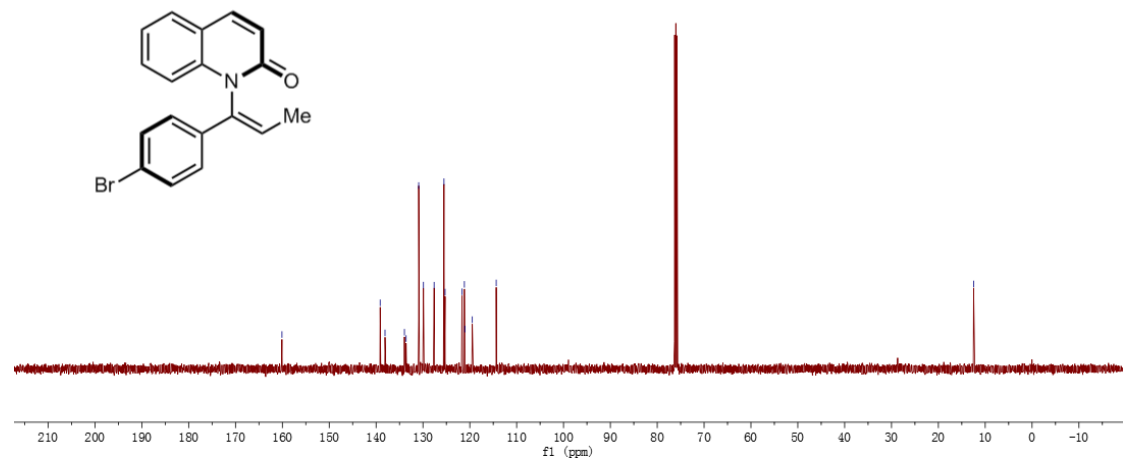

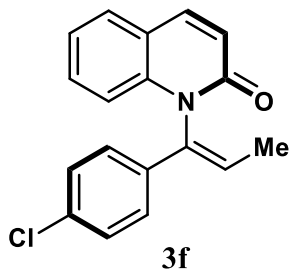

7.883, 7.853, 7.822, 7.802, 7.600, 7.490, 7.480, 7.389, 7.359, 7.328, 7.294, 7.274, 7.253, 7.233, 7.212, 7.200, 7.189, 7.168, 6.773, 6.753, 6.733, 1.580, 1.560

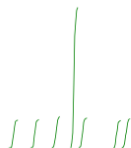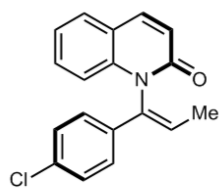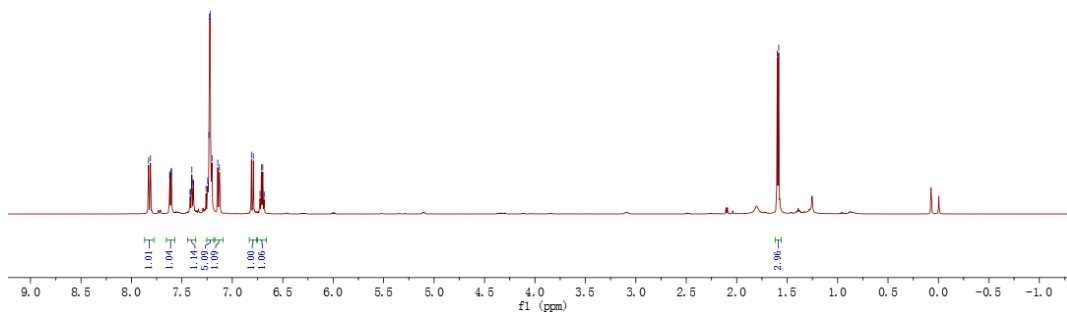

160.11, 139.14, 138.09, 133.88, 133.11, 128.98, 128.90, 127.96, 125.21, 125.21, 121.95, 119.47, 114.38, 12.46

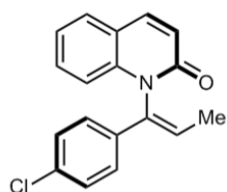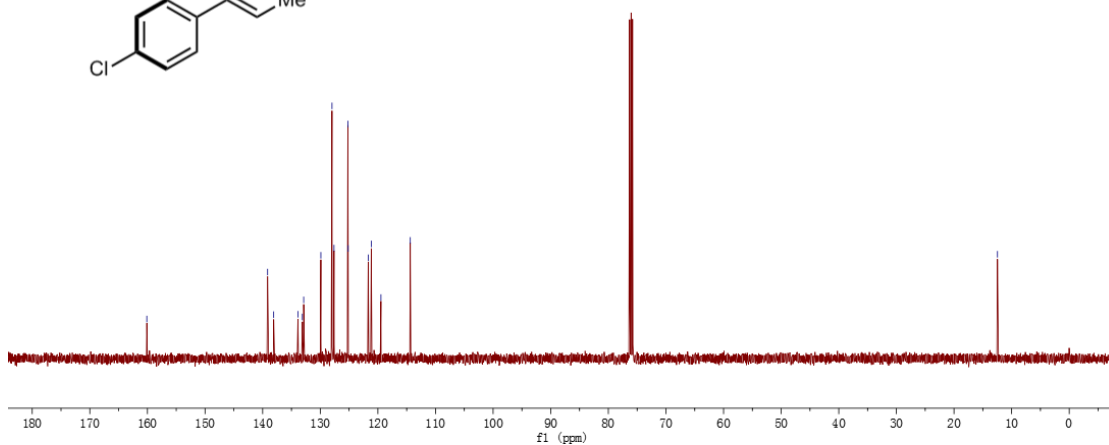

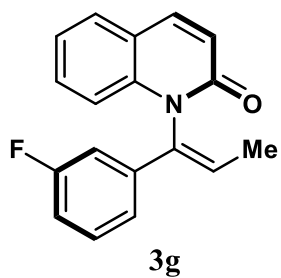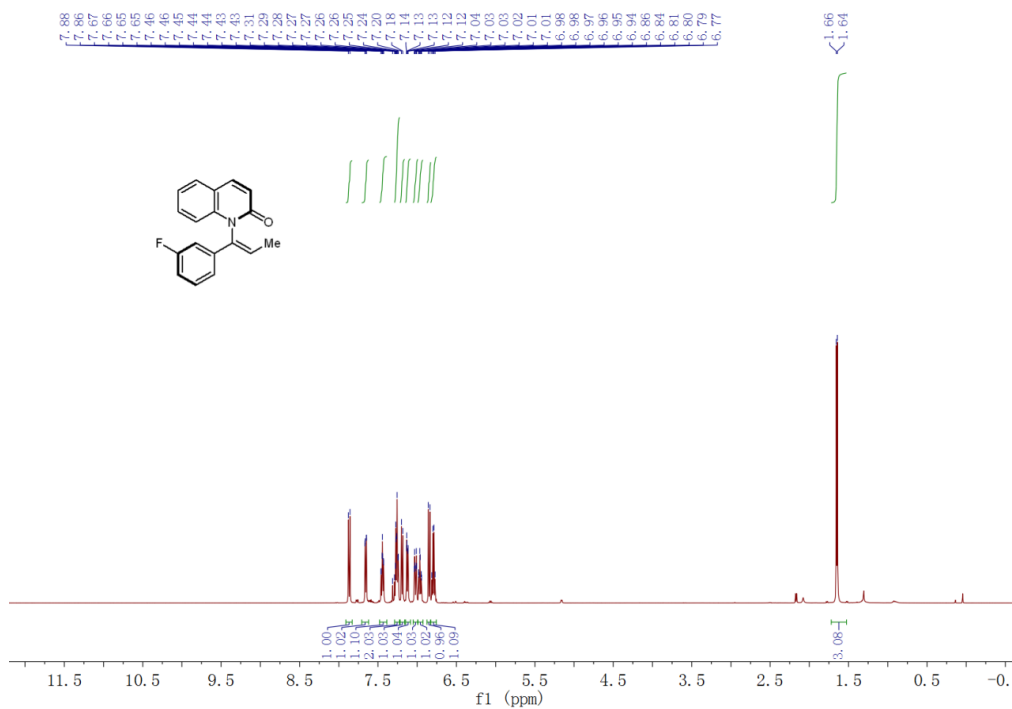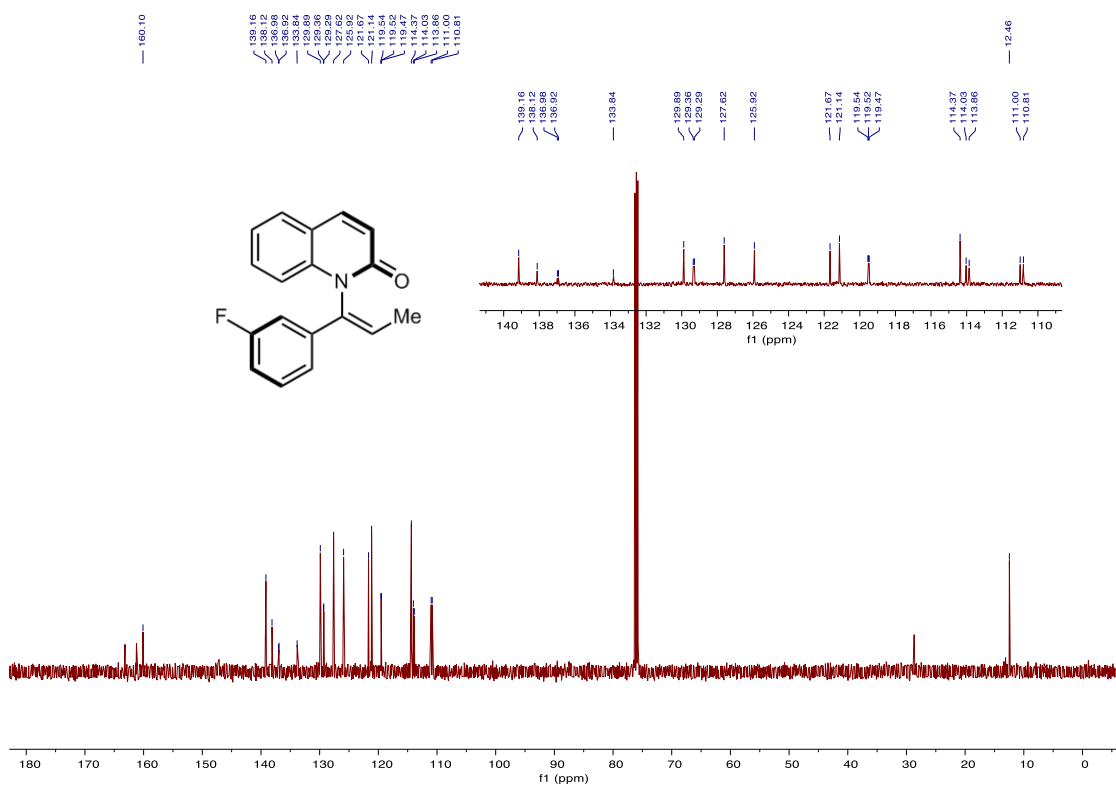

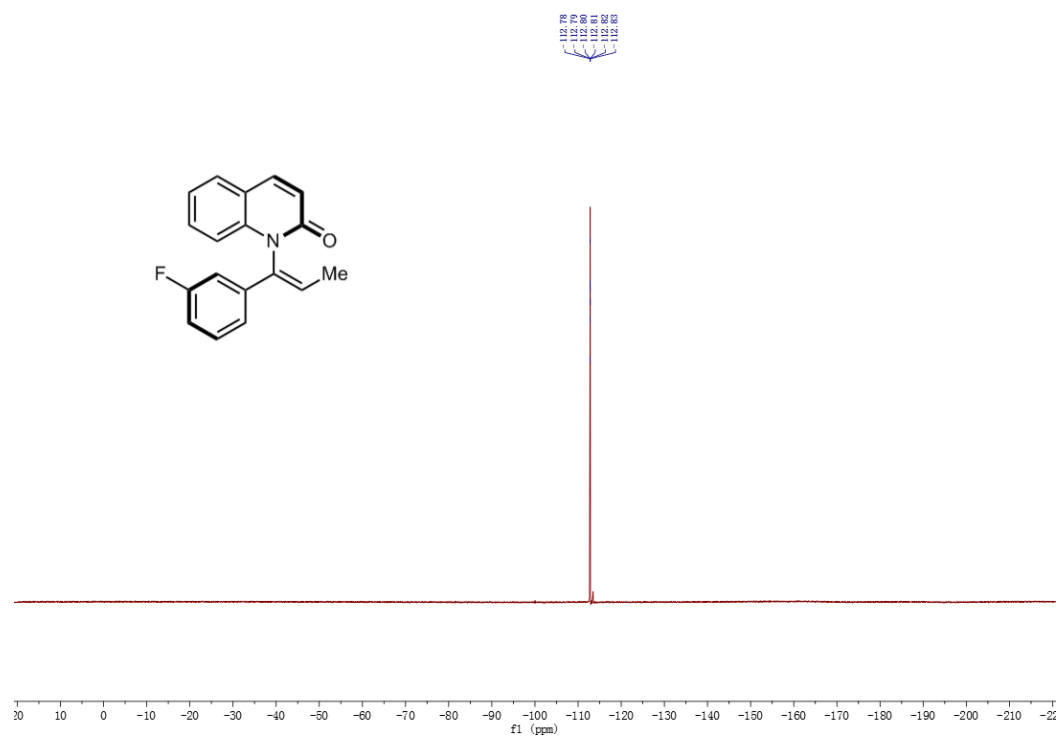

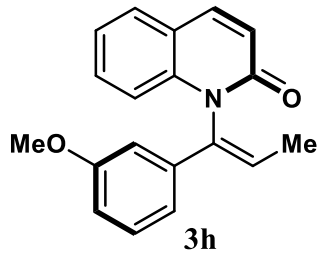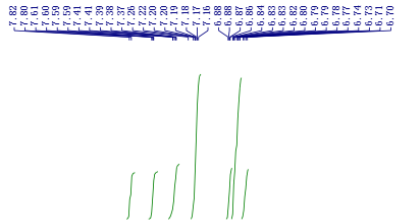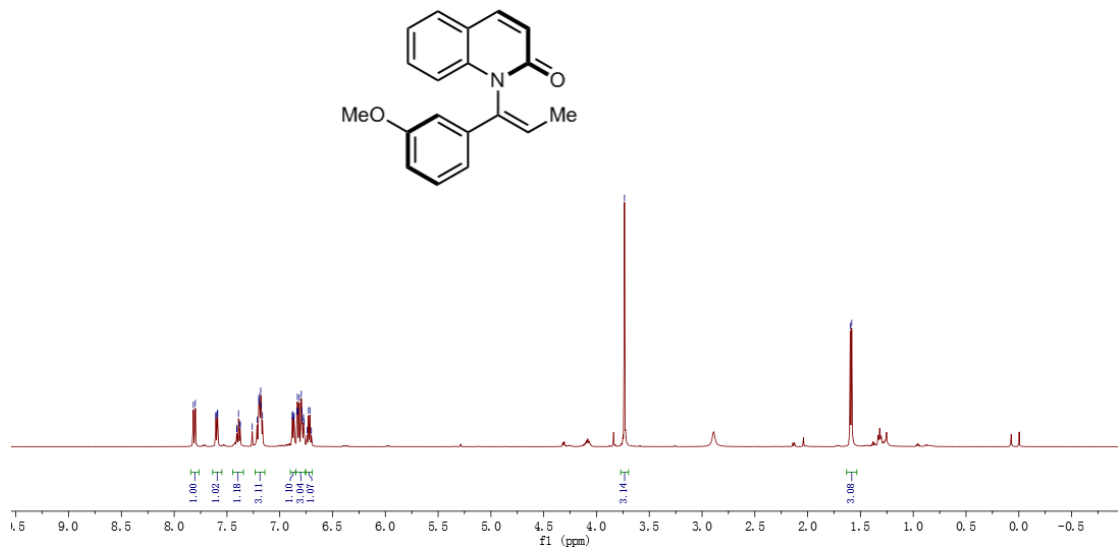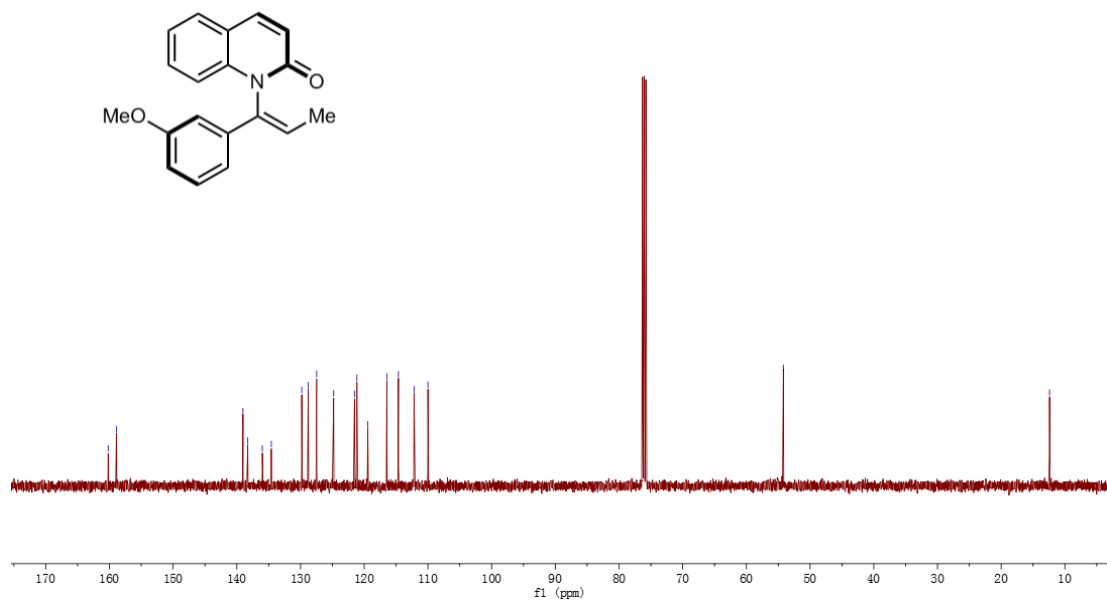

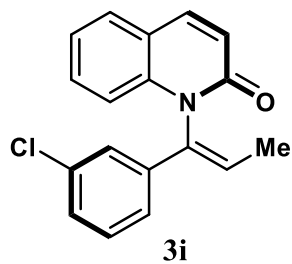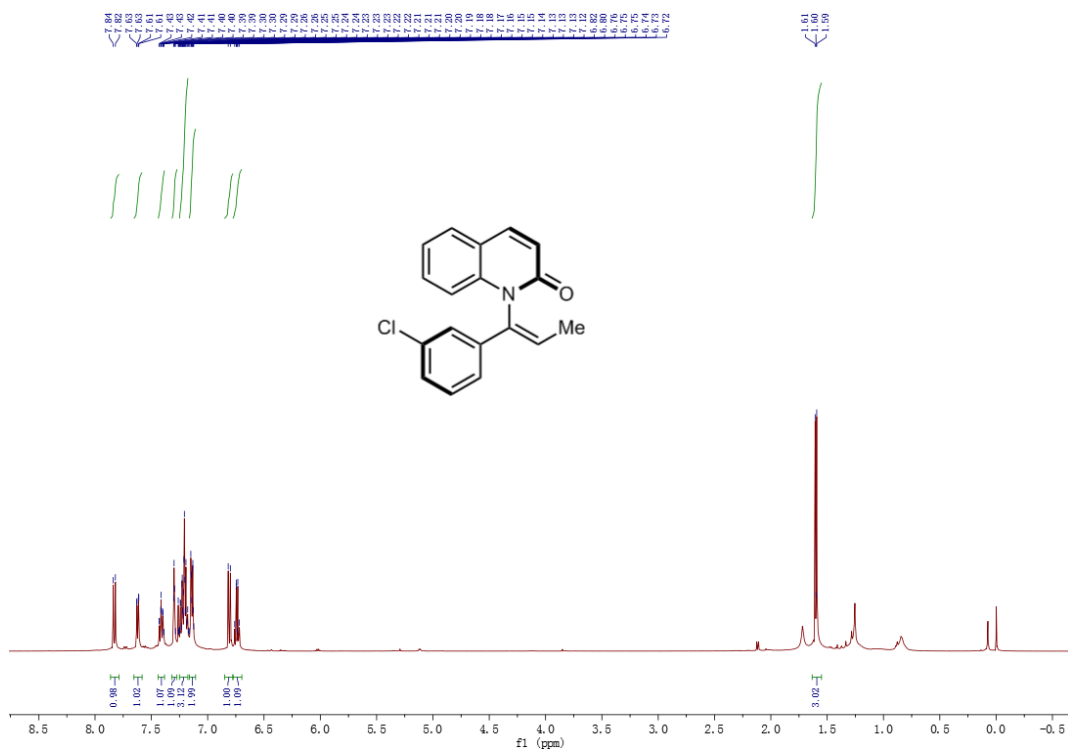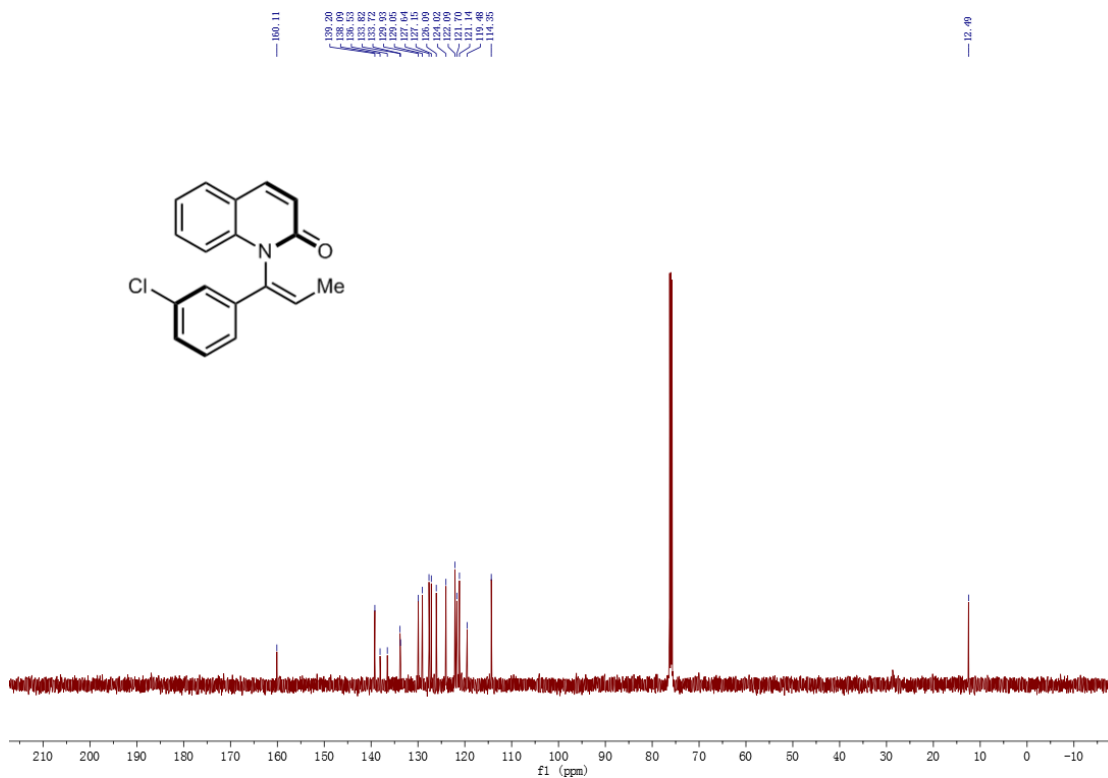

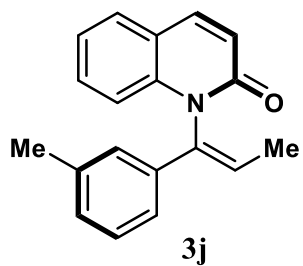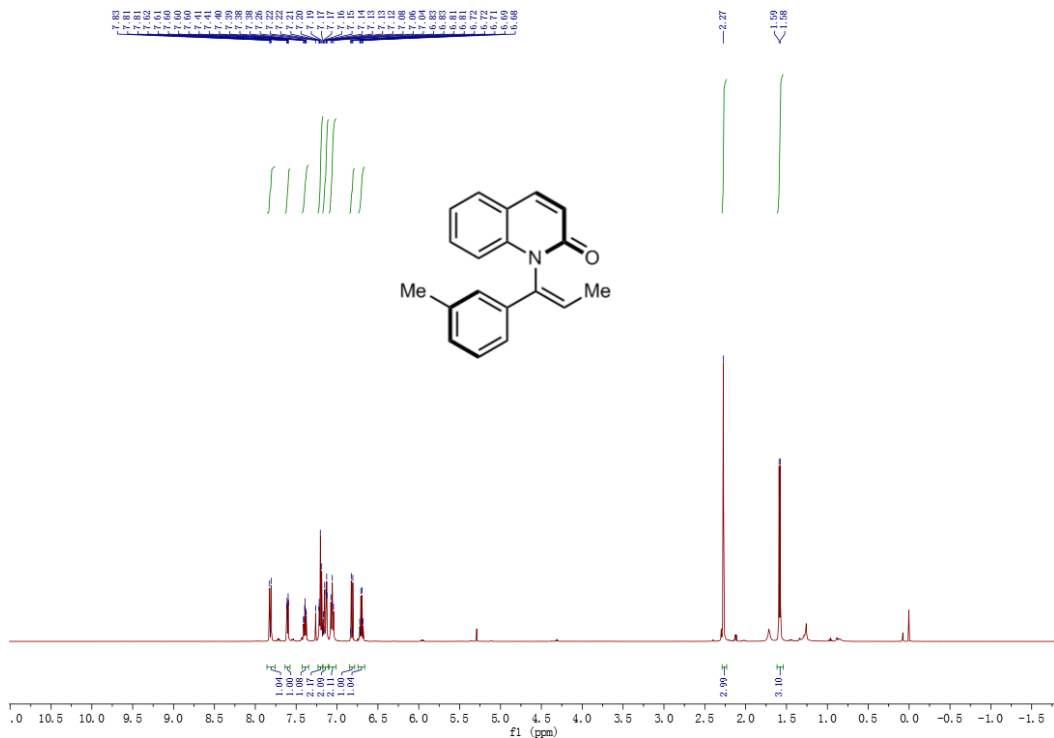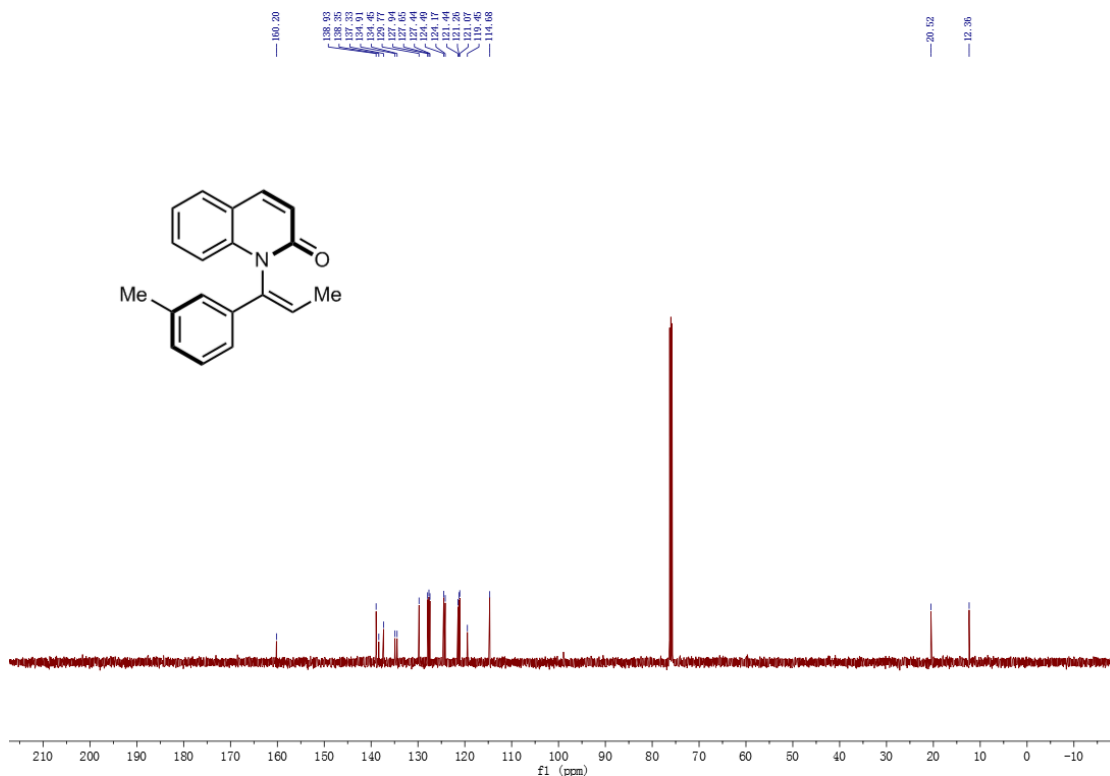



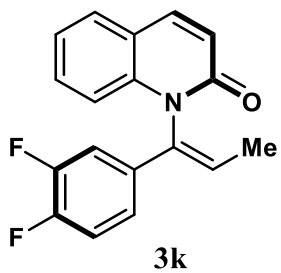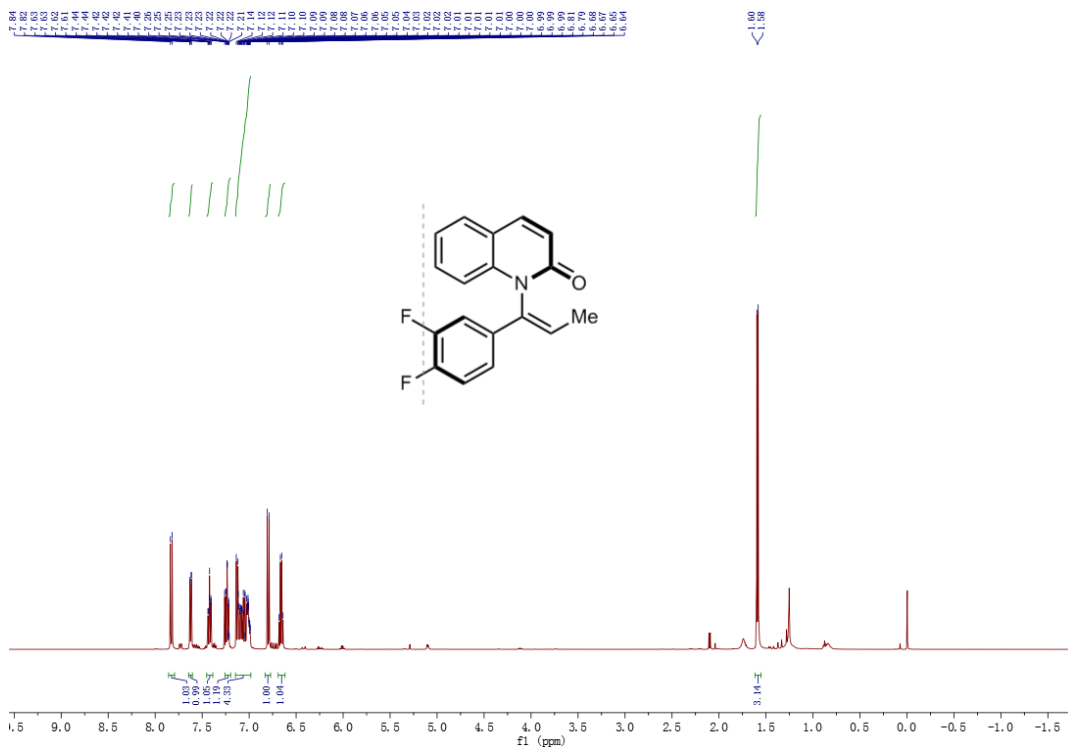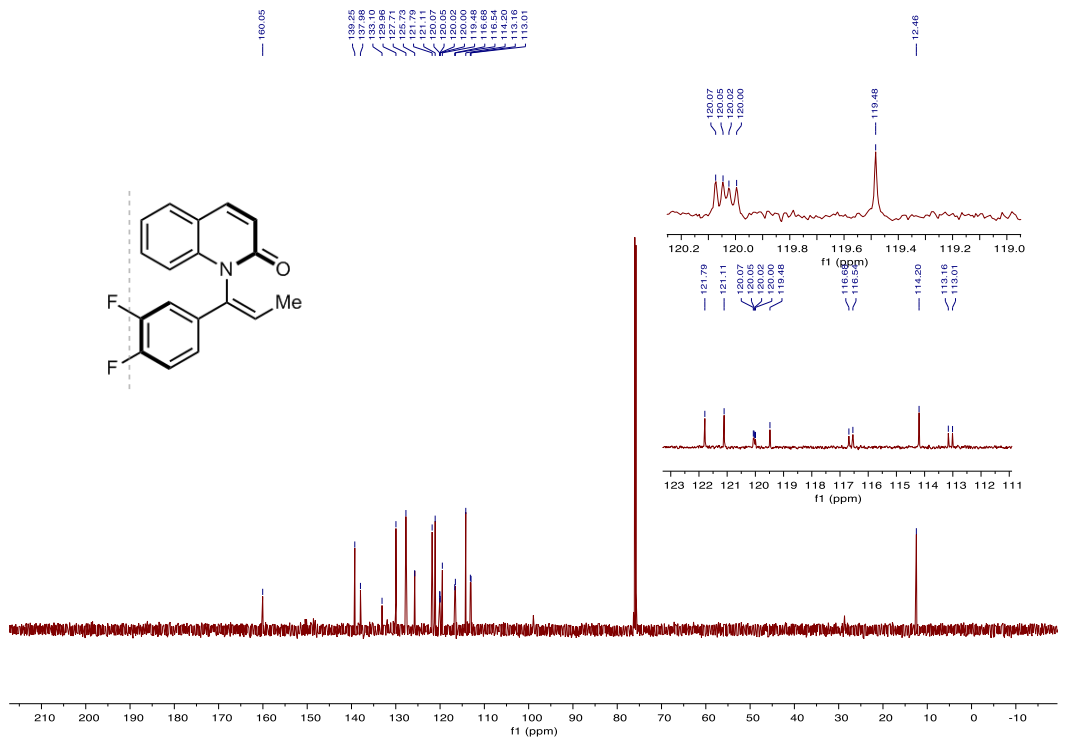

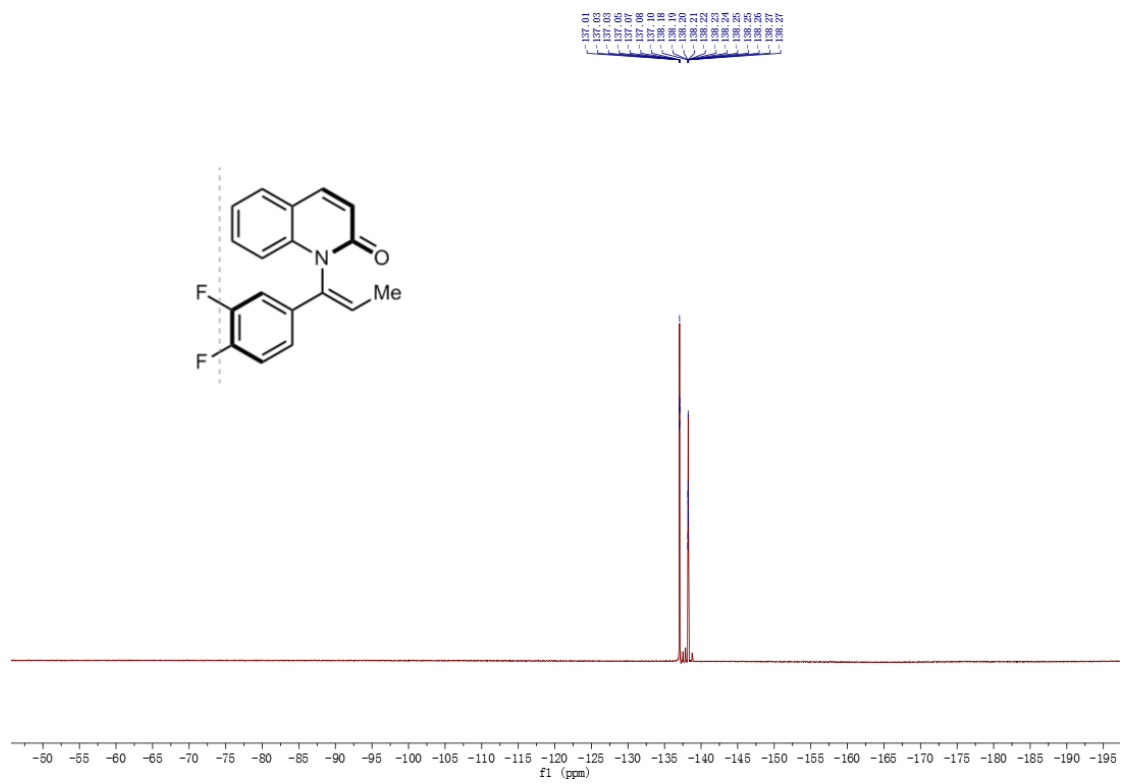

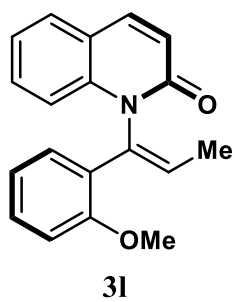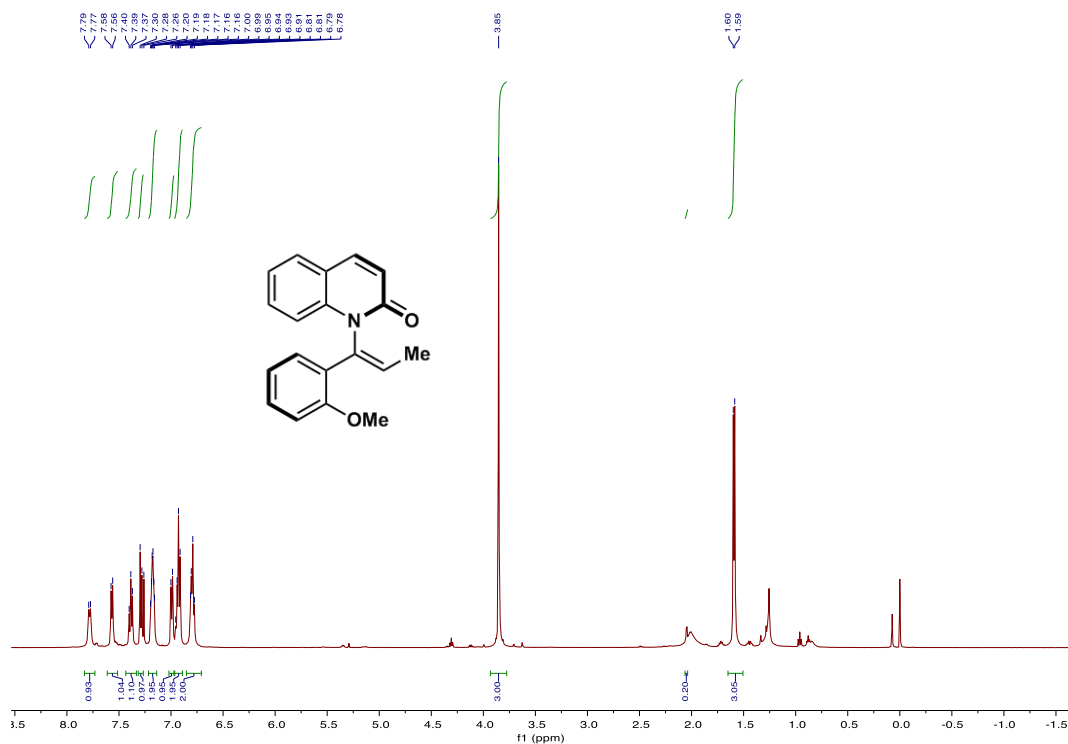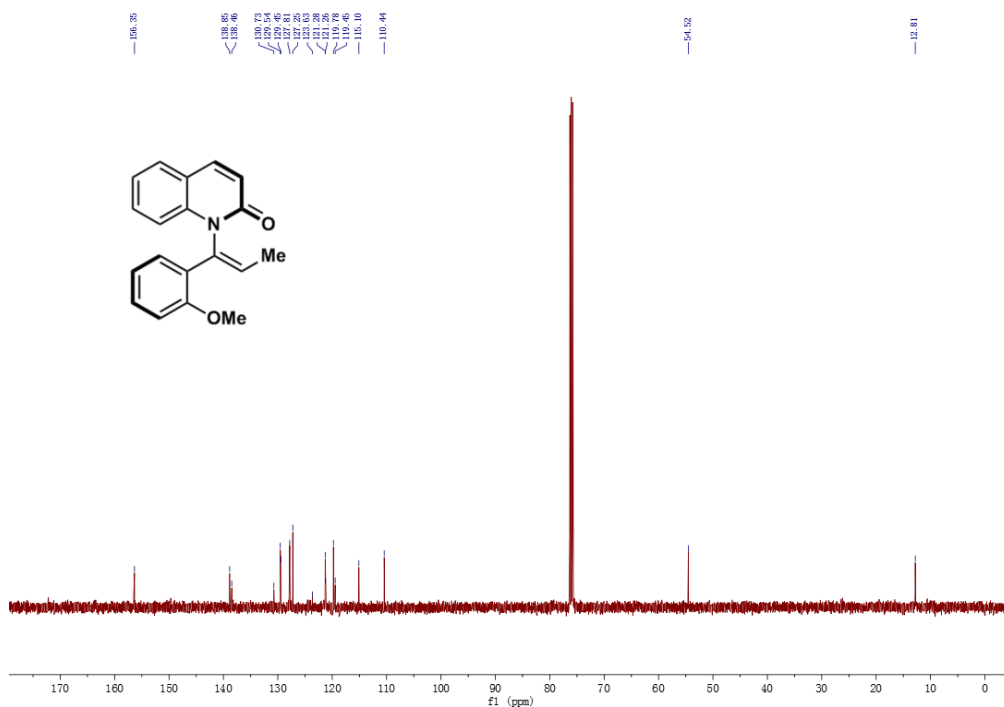

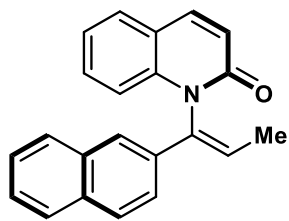

3m

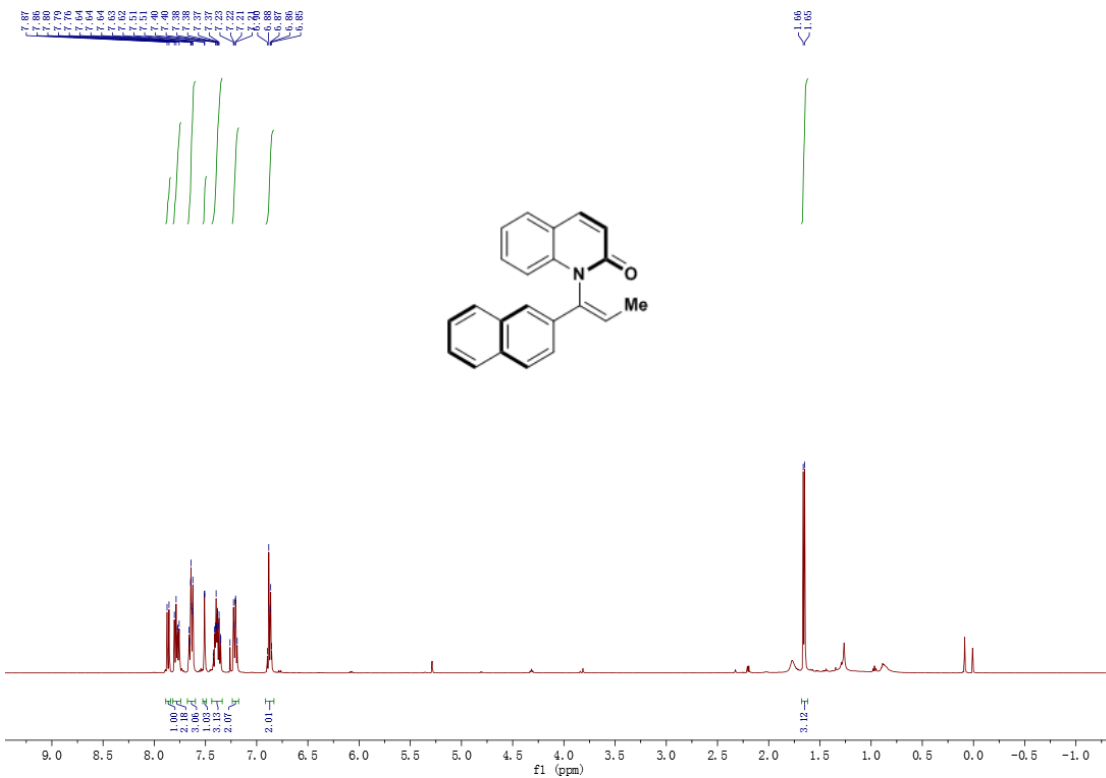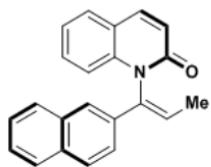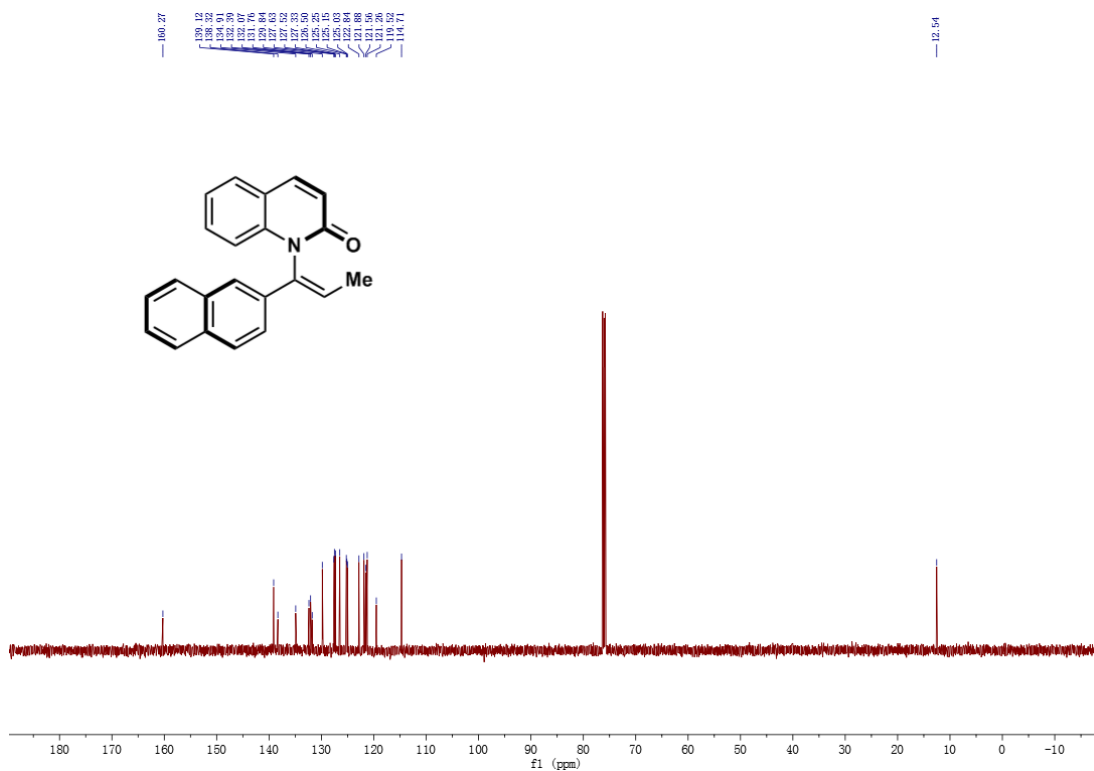

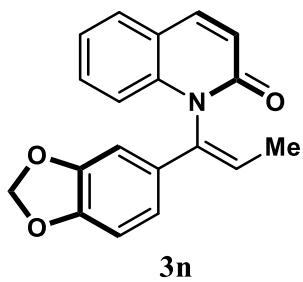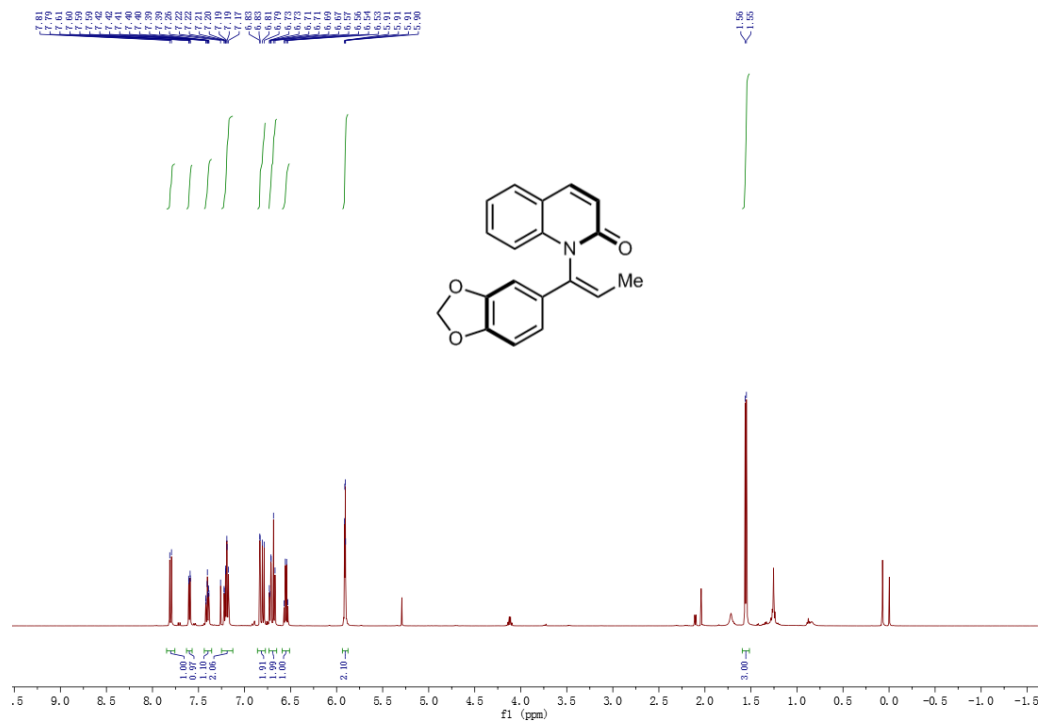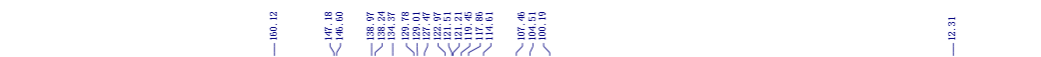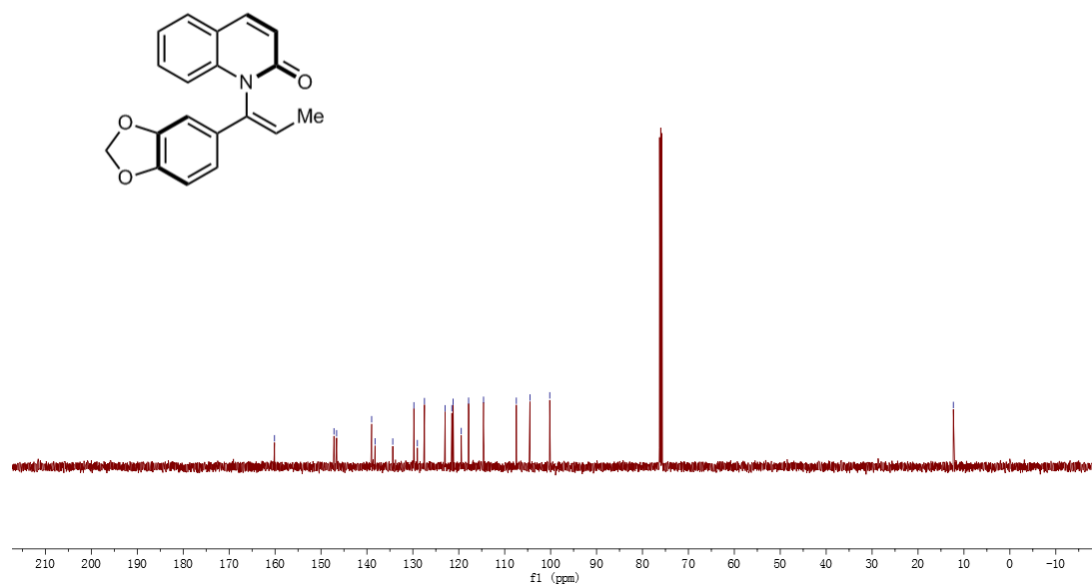

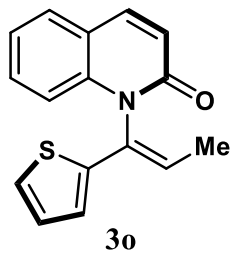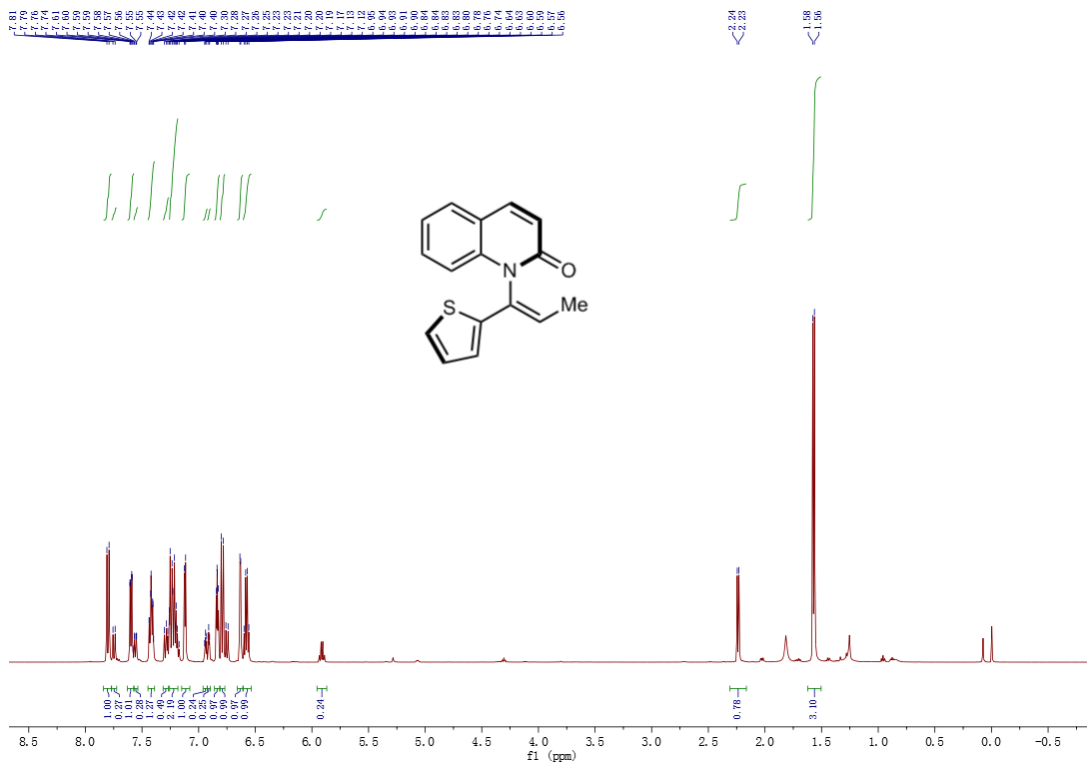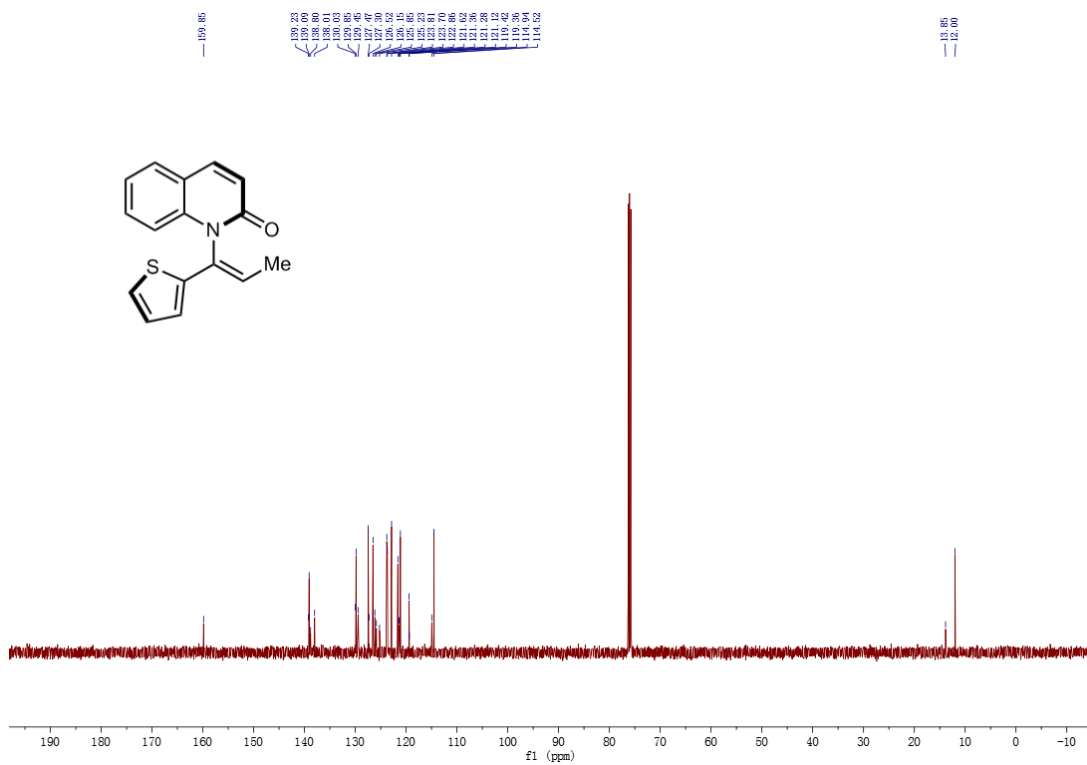

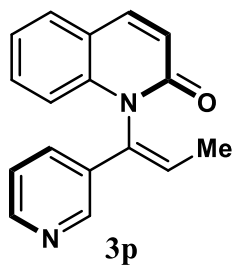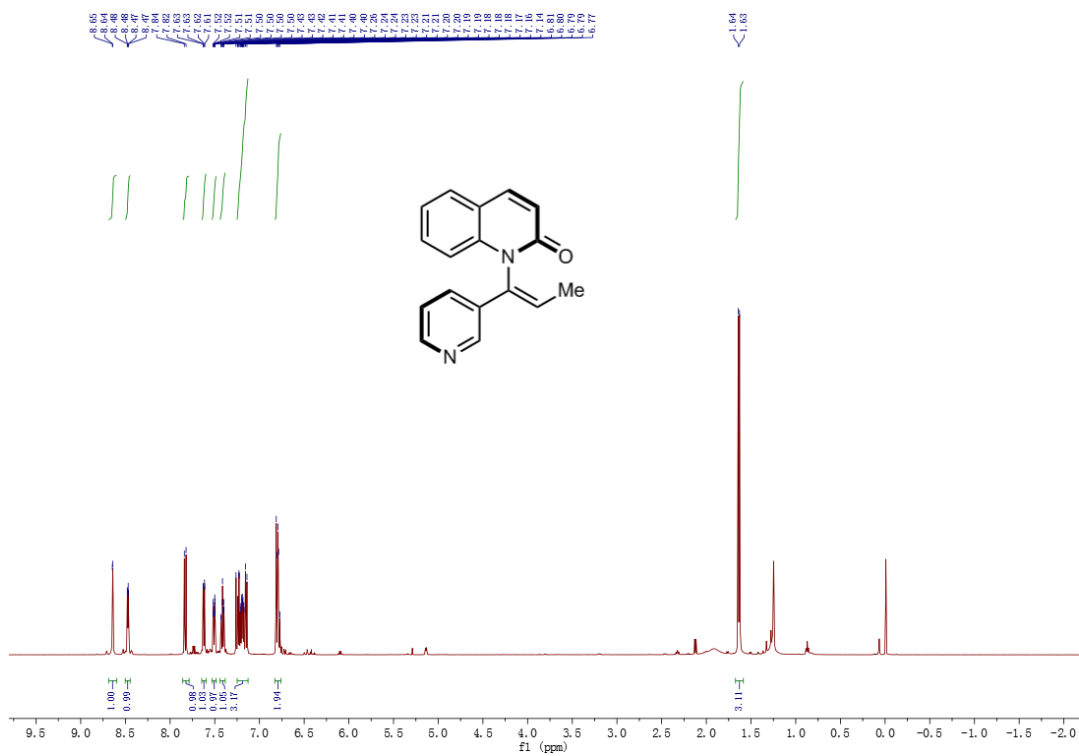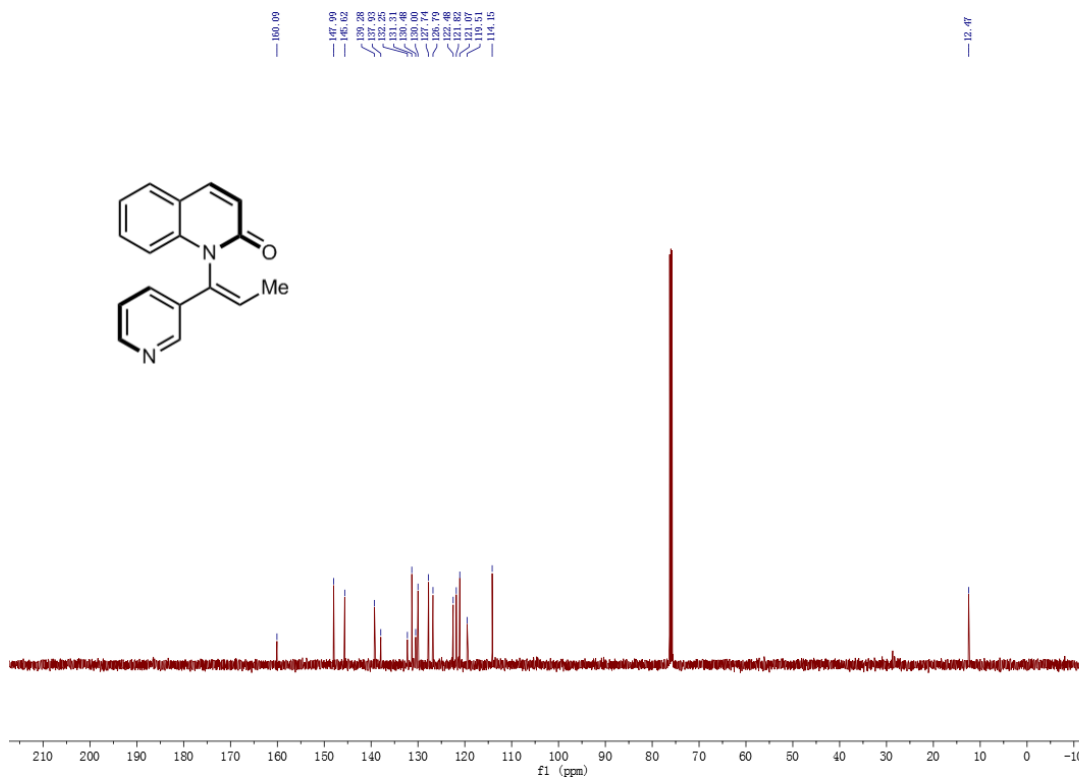

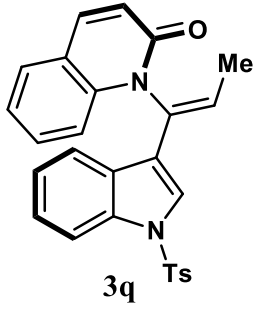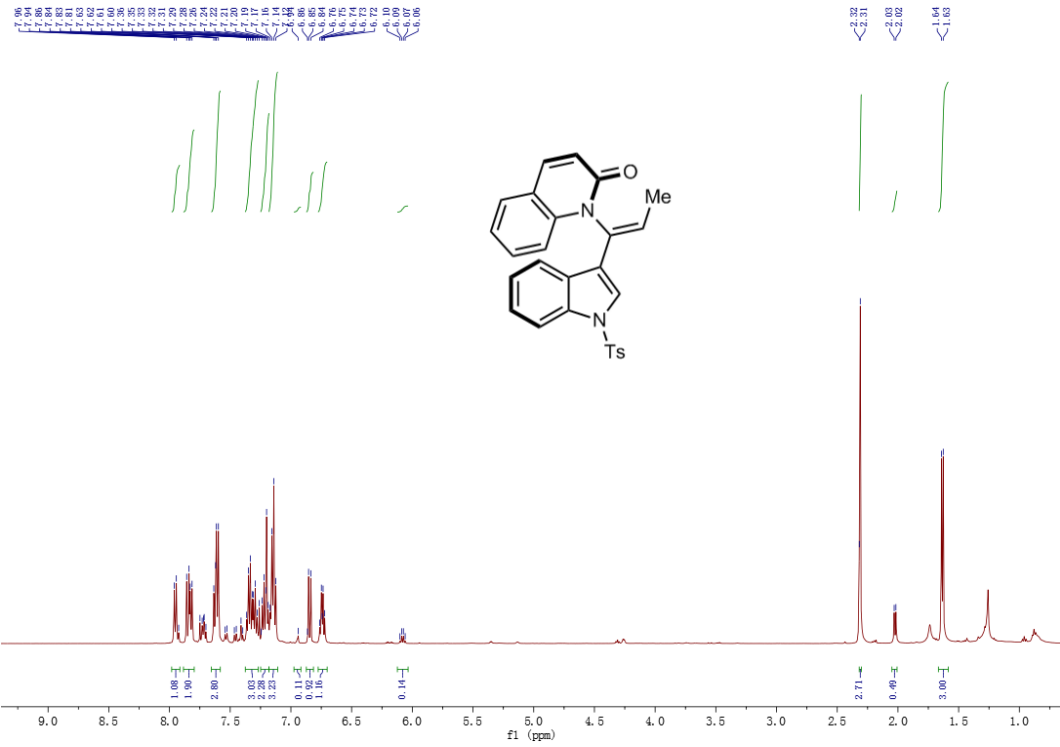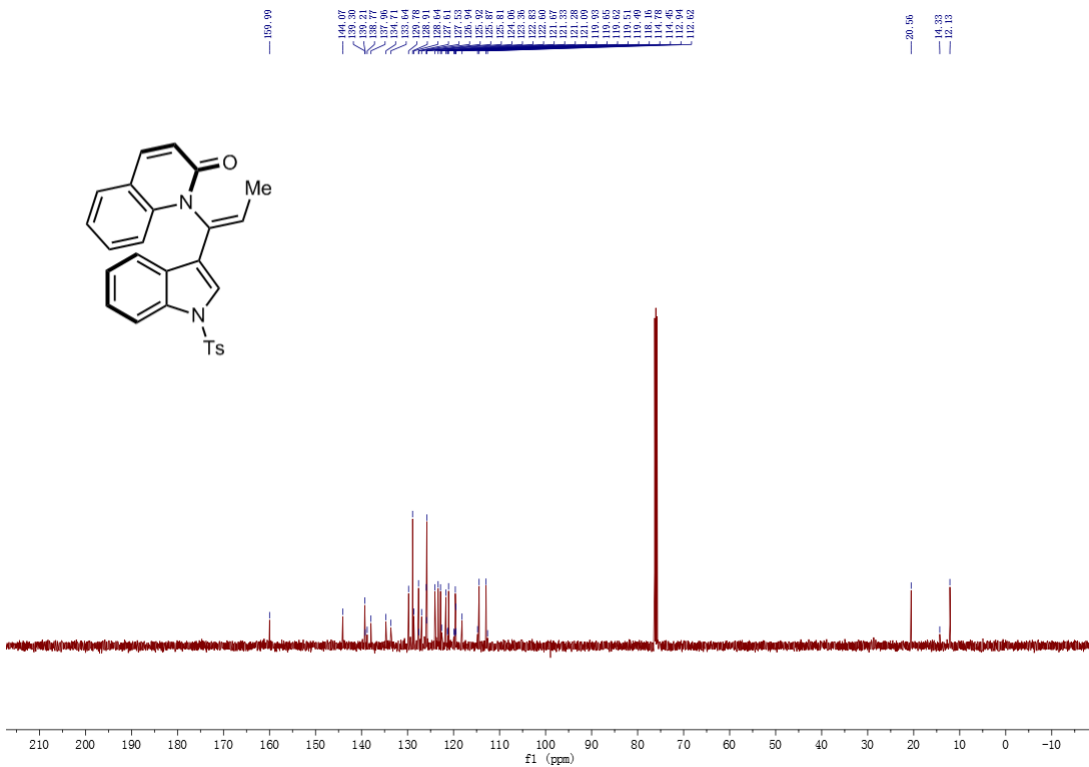



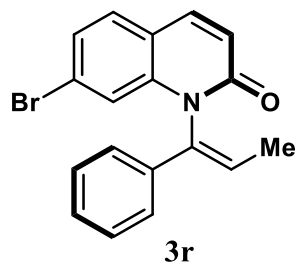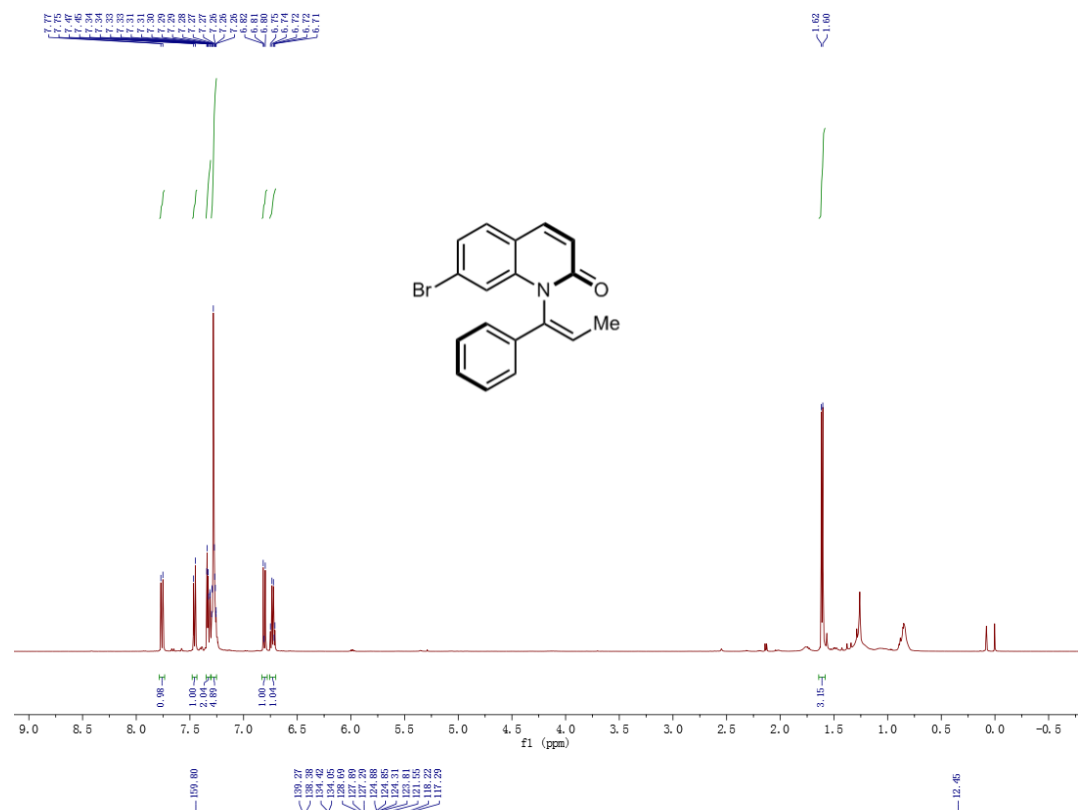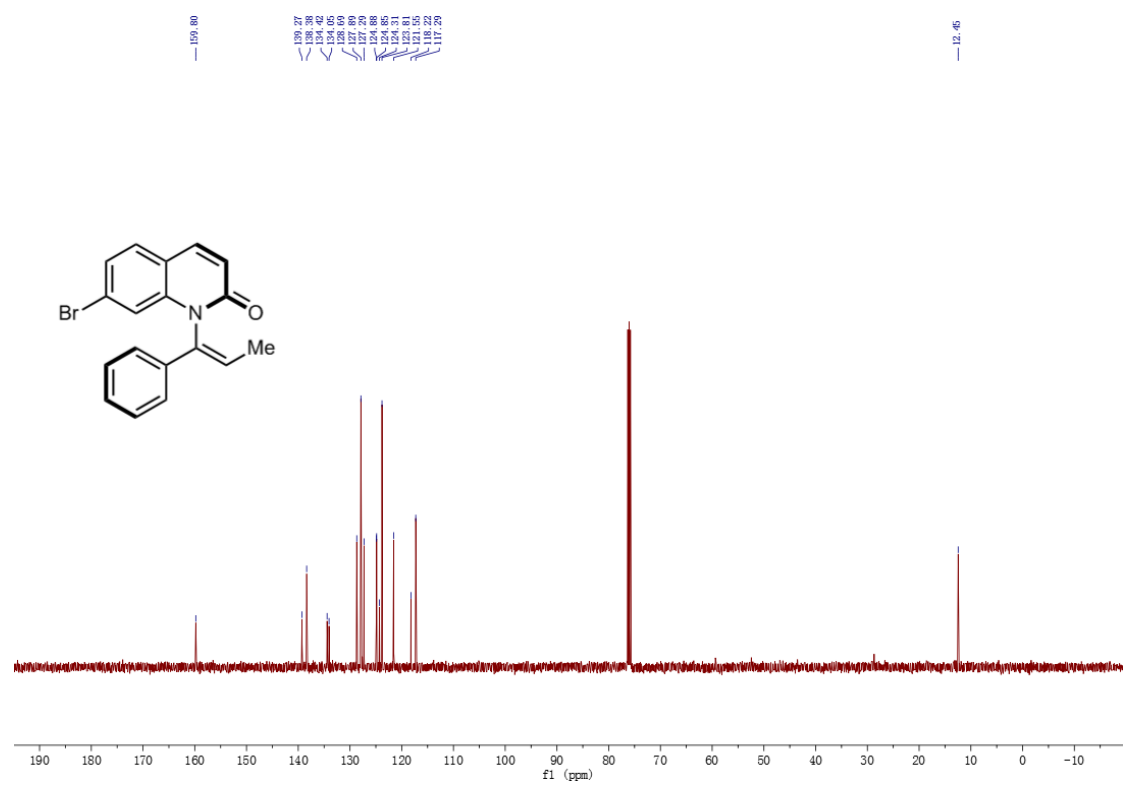

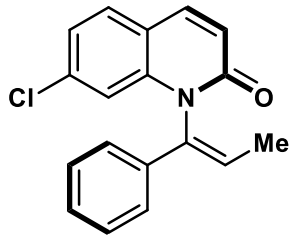

3s

7.786, 7.753, 7.731, 7.729, 7.727, 7.726, 7.725, 7.724, 7.718, 7.716, 7.706, 7.698, 7.675, 7.672, 7.671

1.60

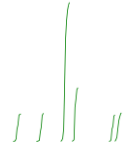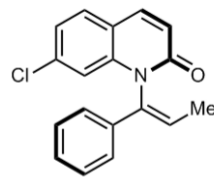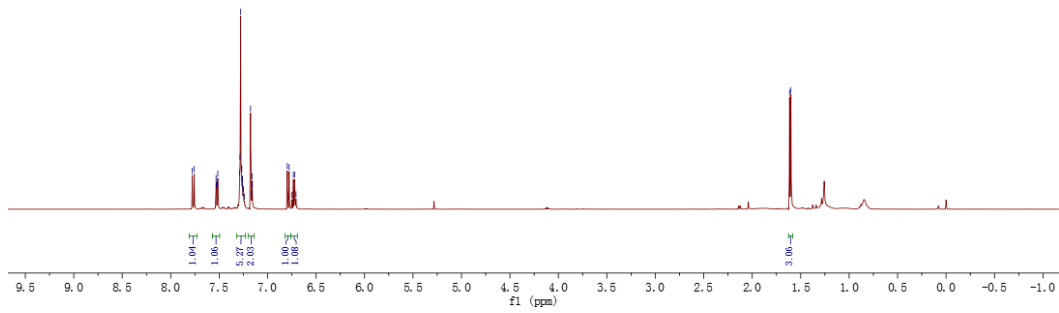

155.90

139.18, 138.06, 134.45, 134.01, 128.60, 127.29, 124.82, 124.81, 122.08, 121.30, 114.37

12.43

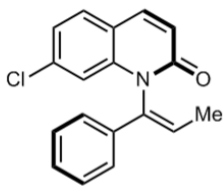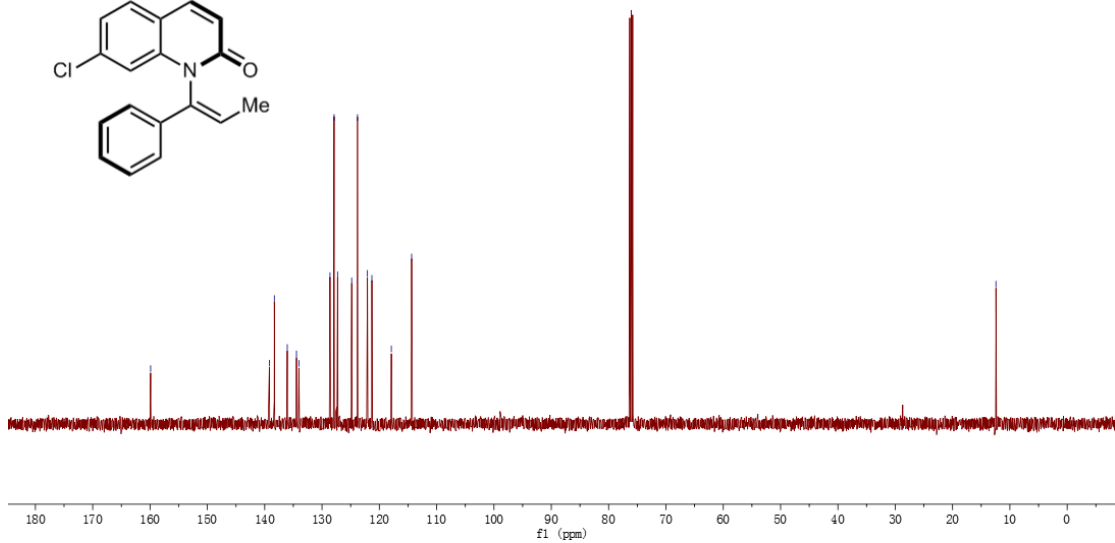

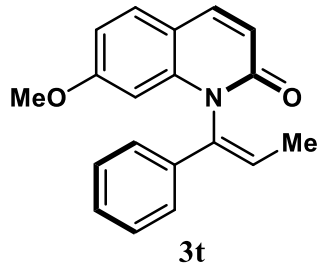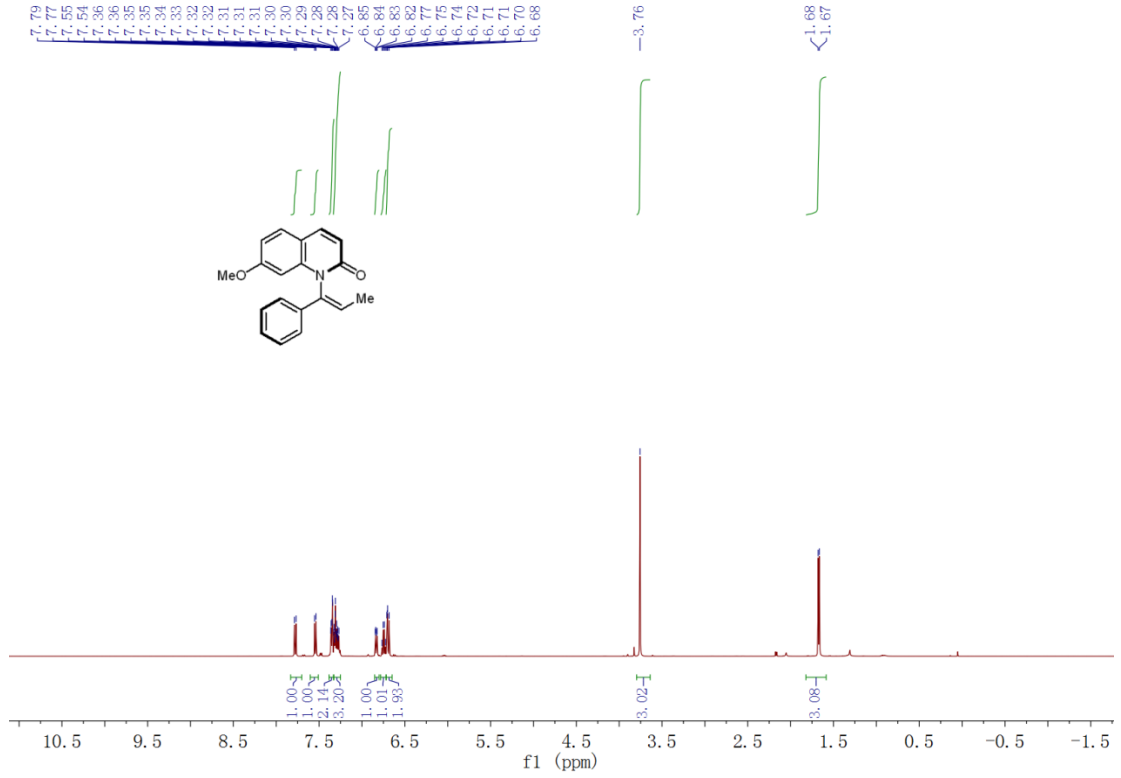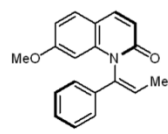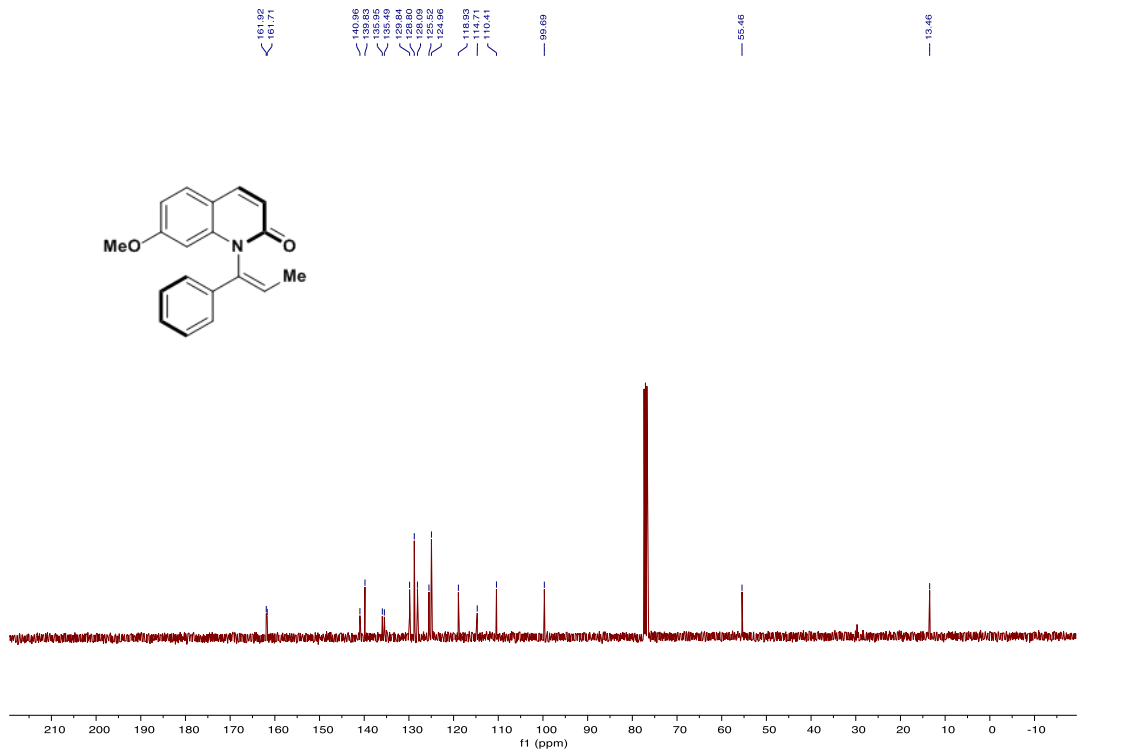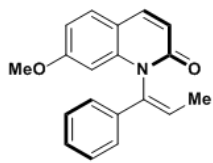

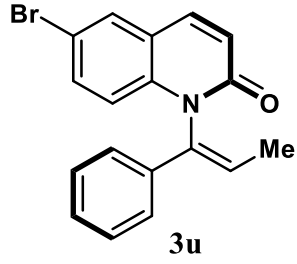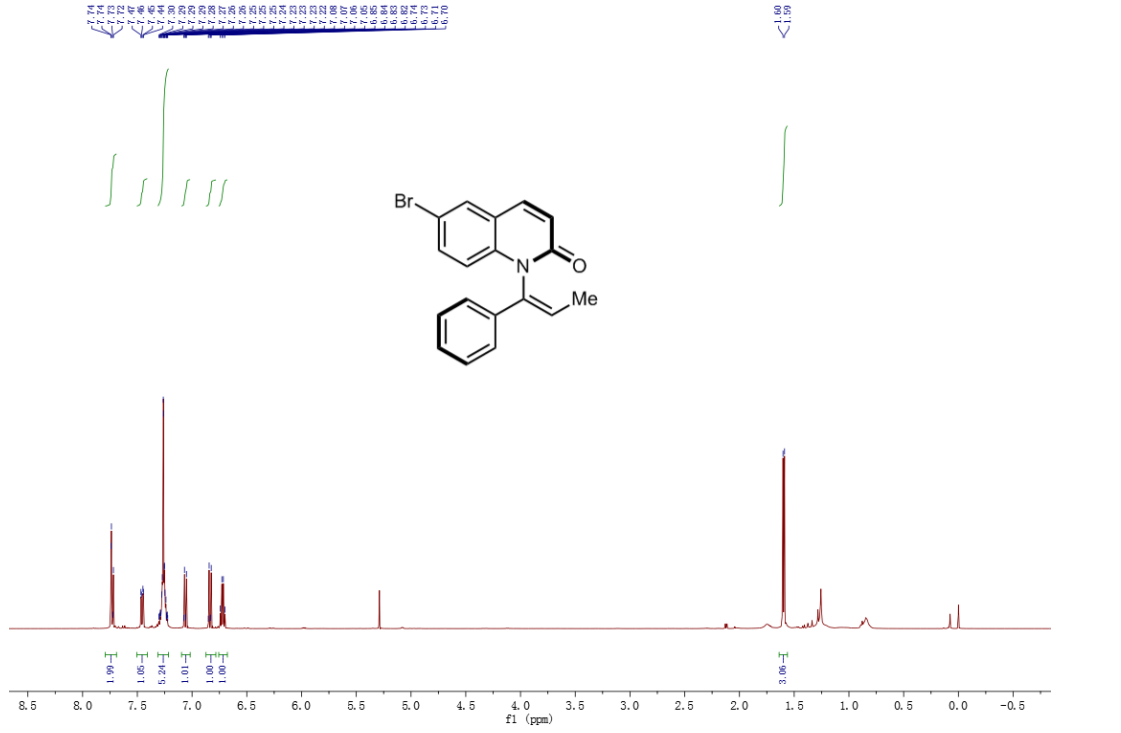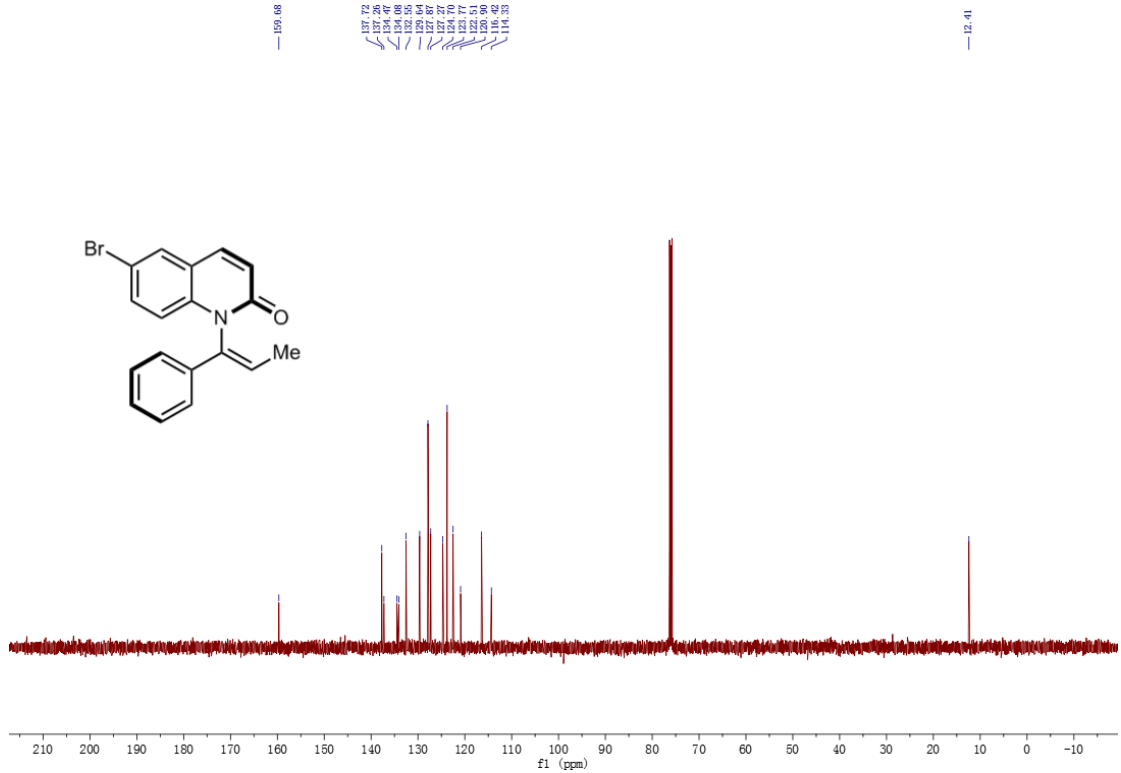

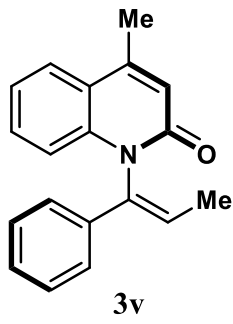

3v

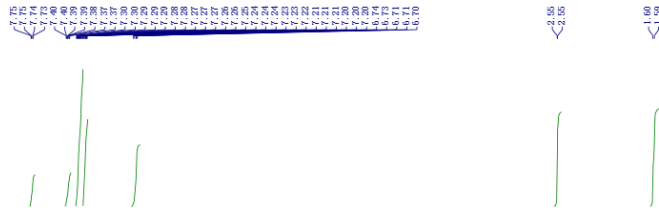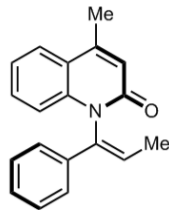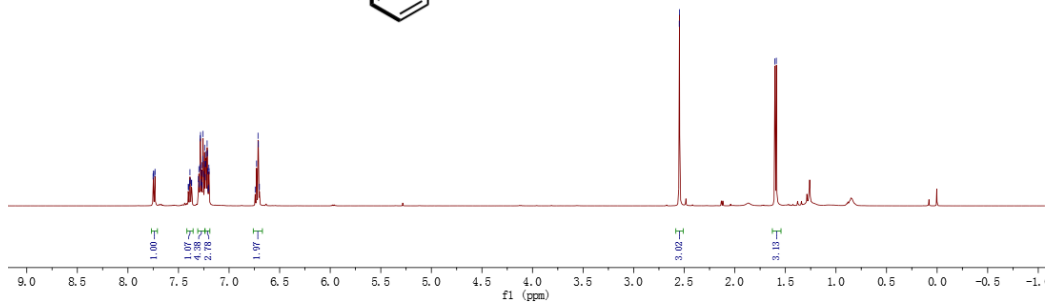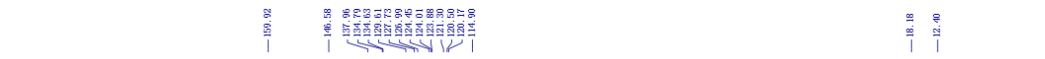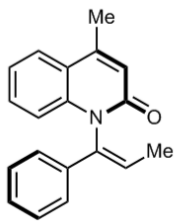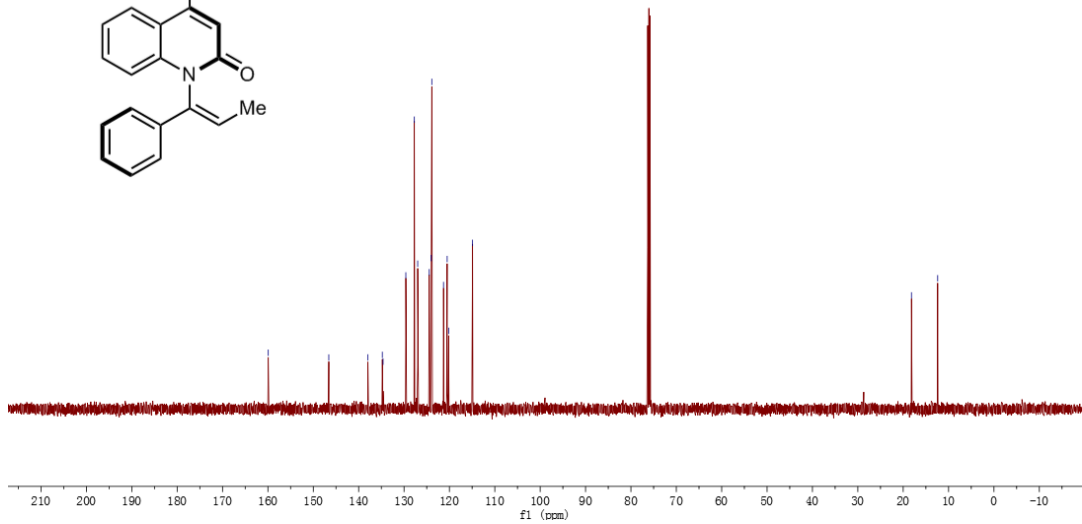

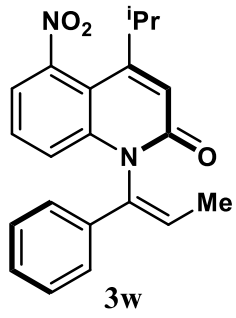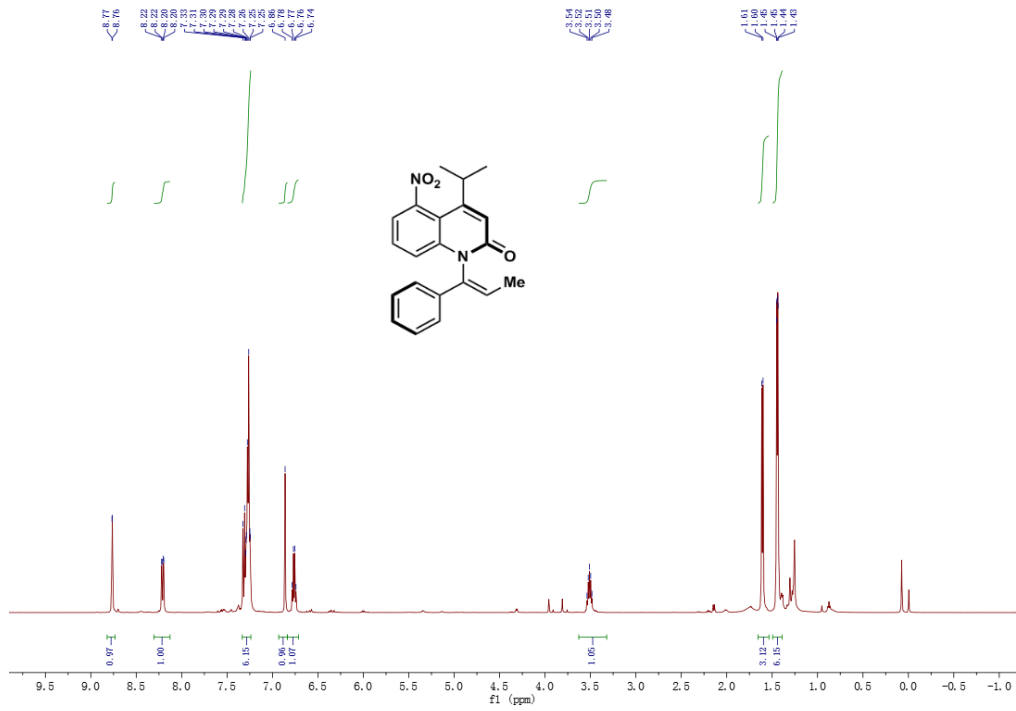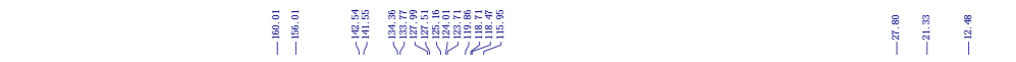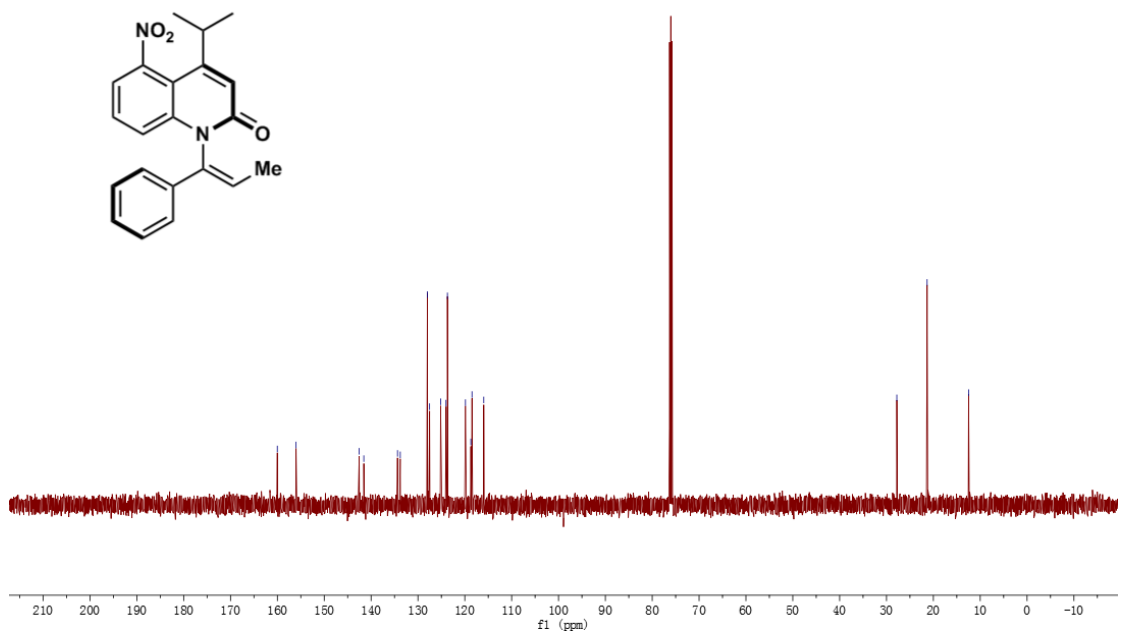

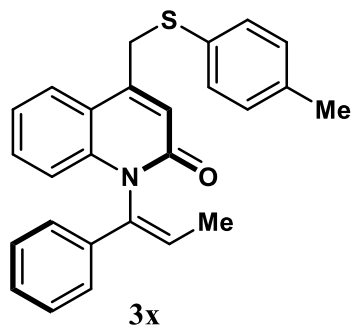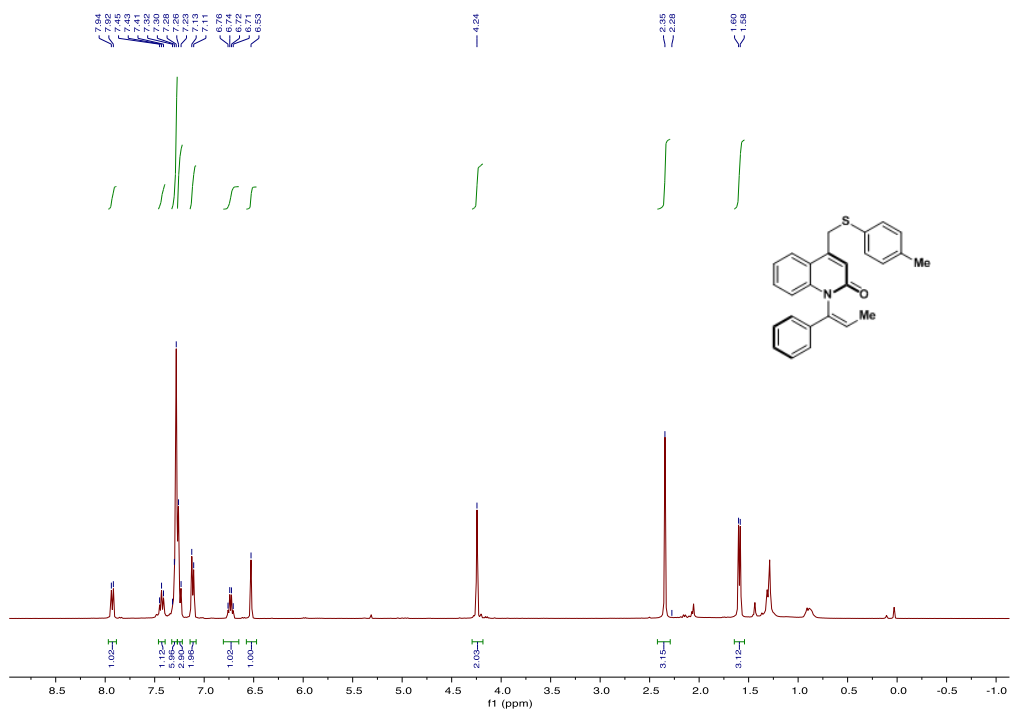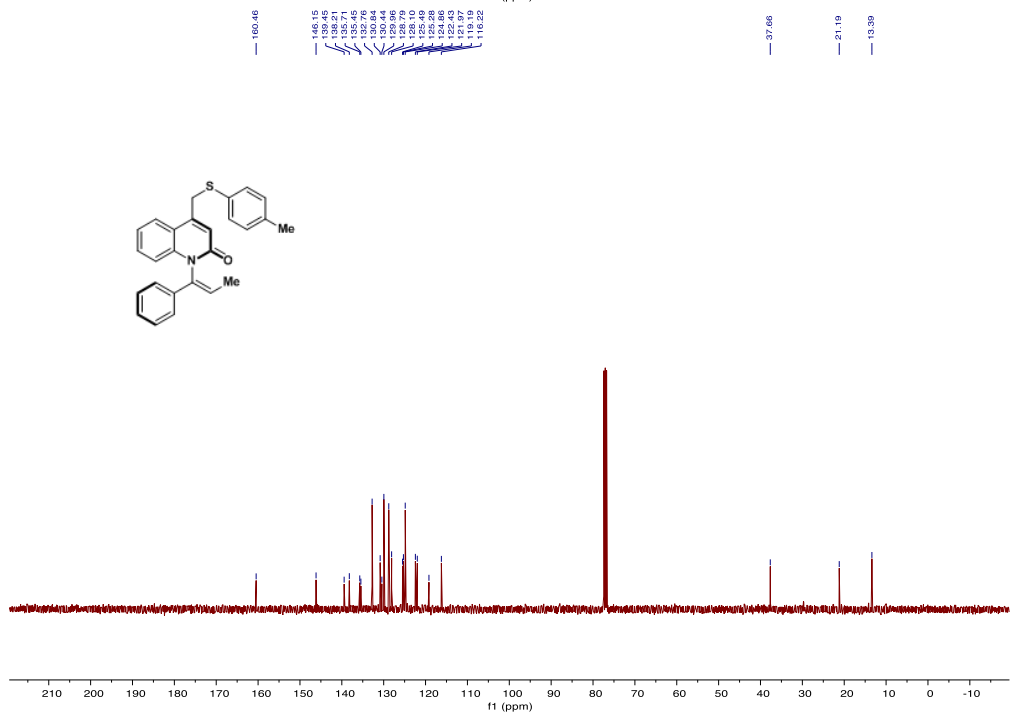

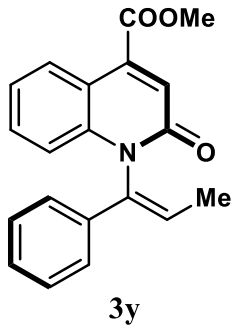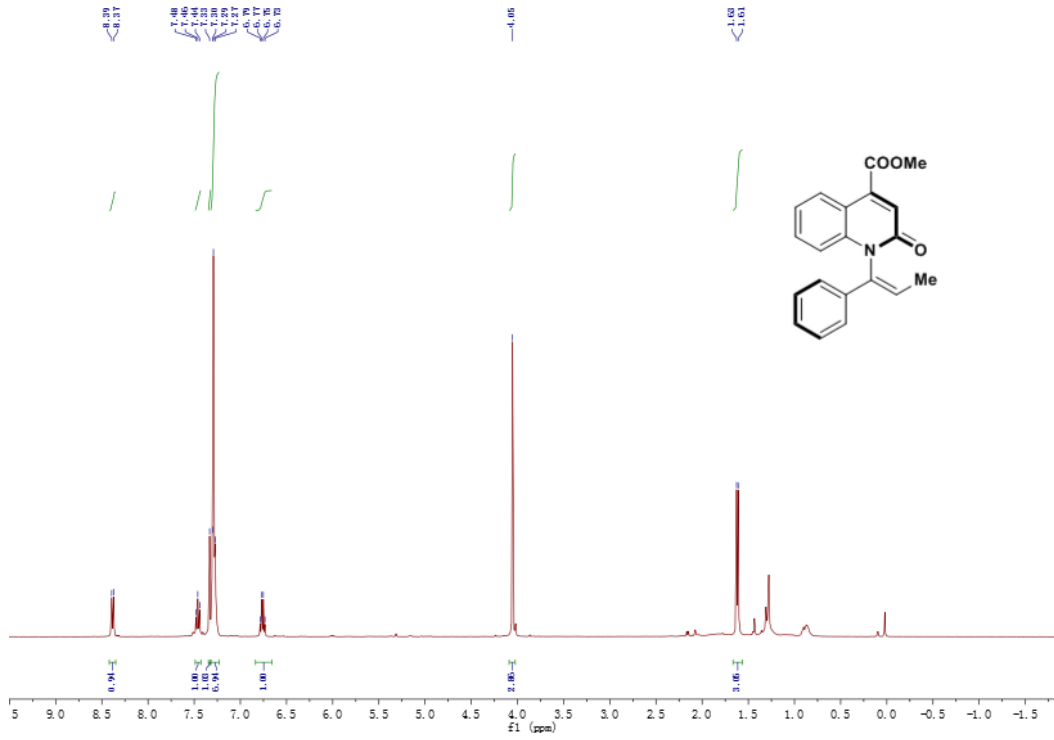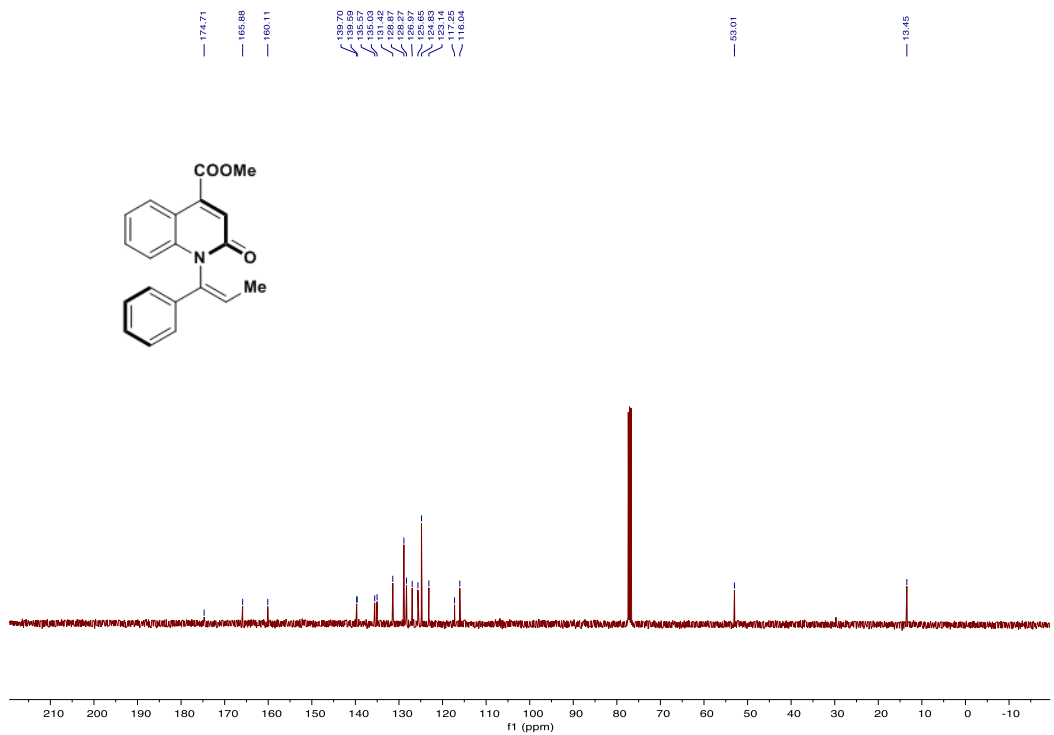



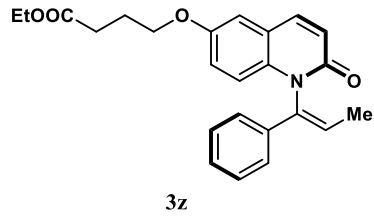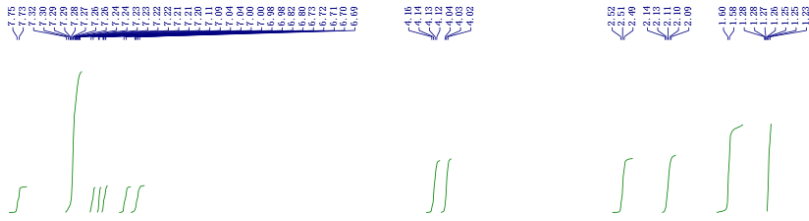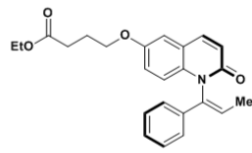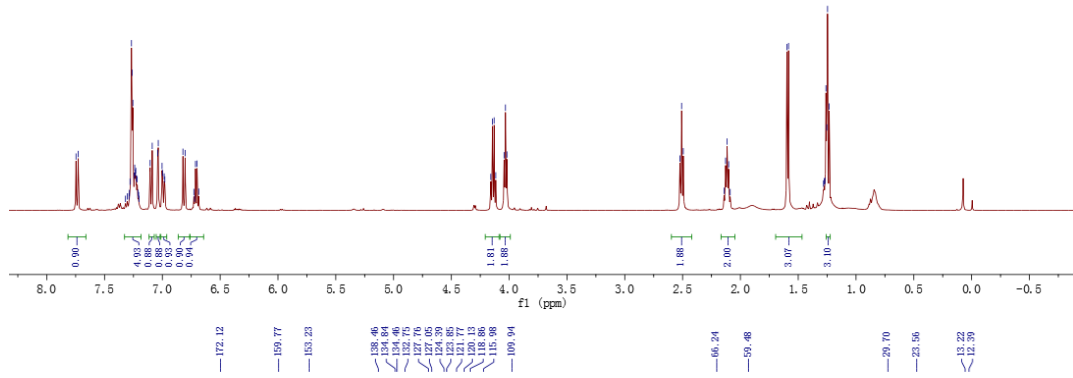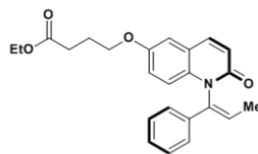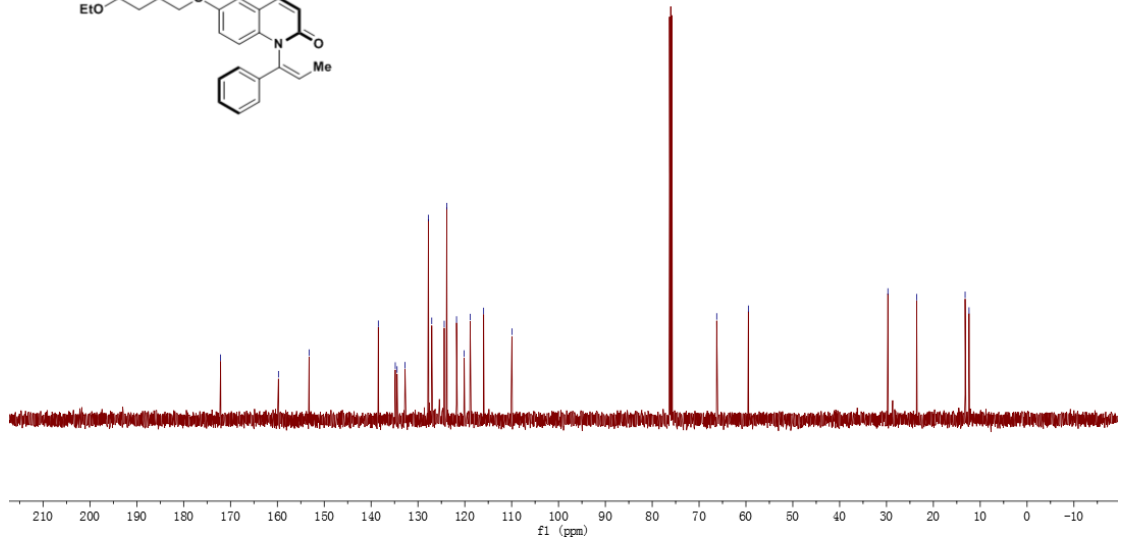

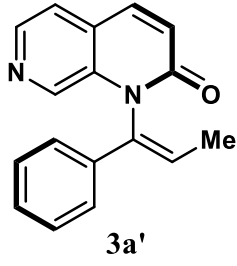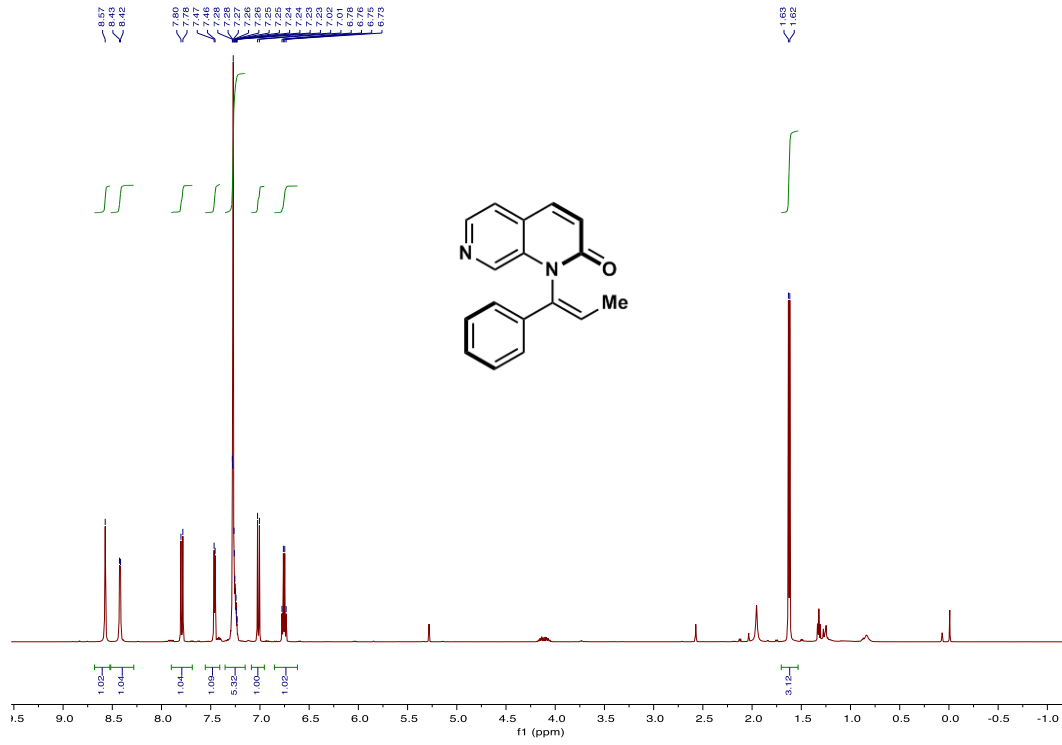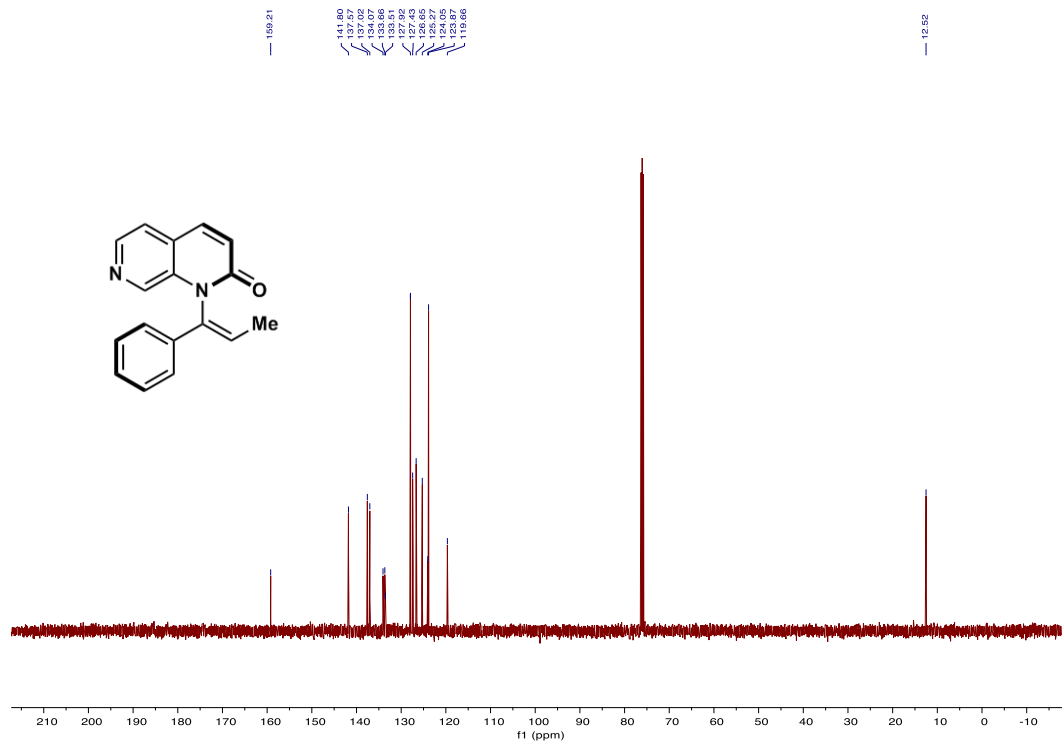

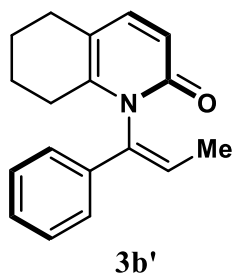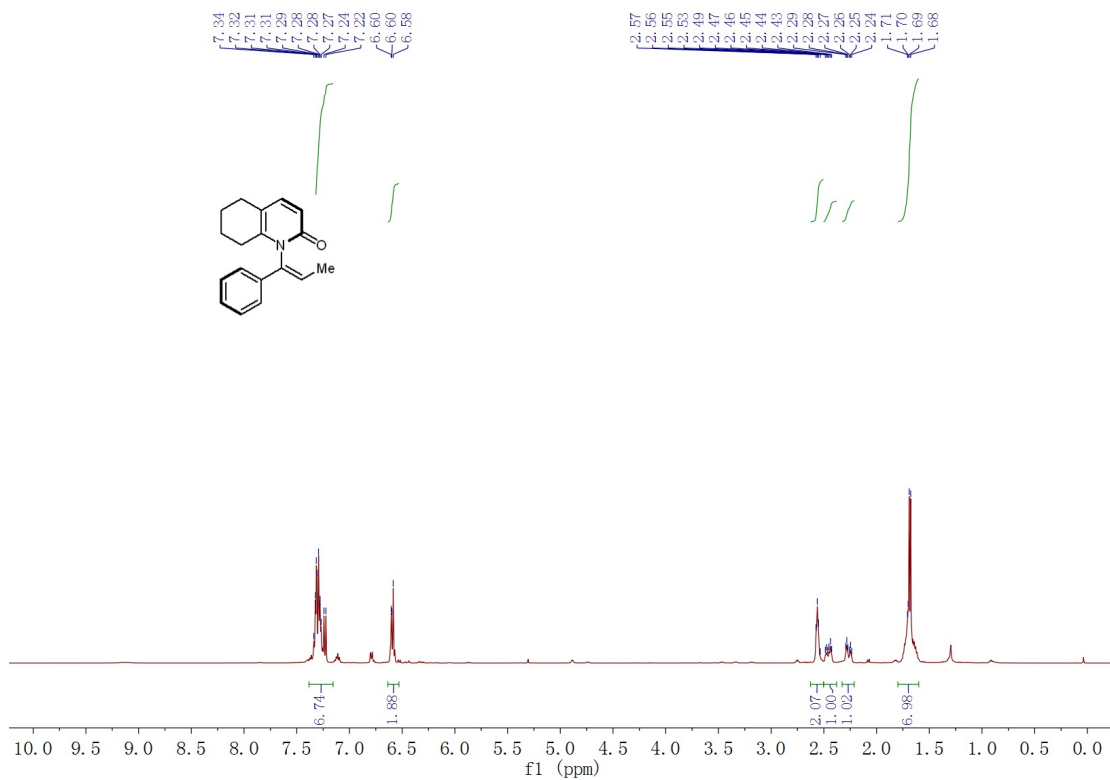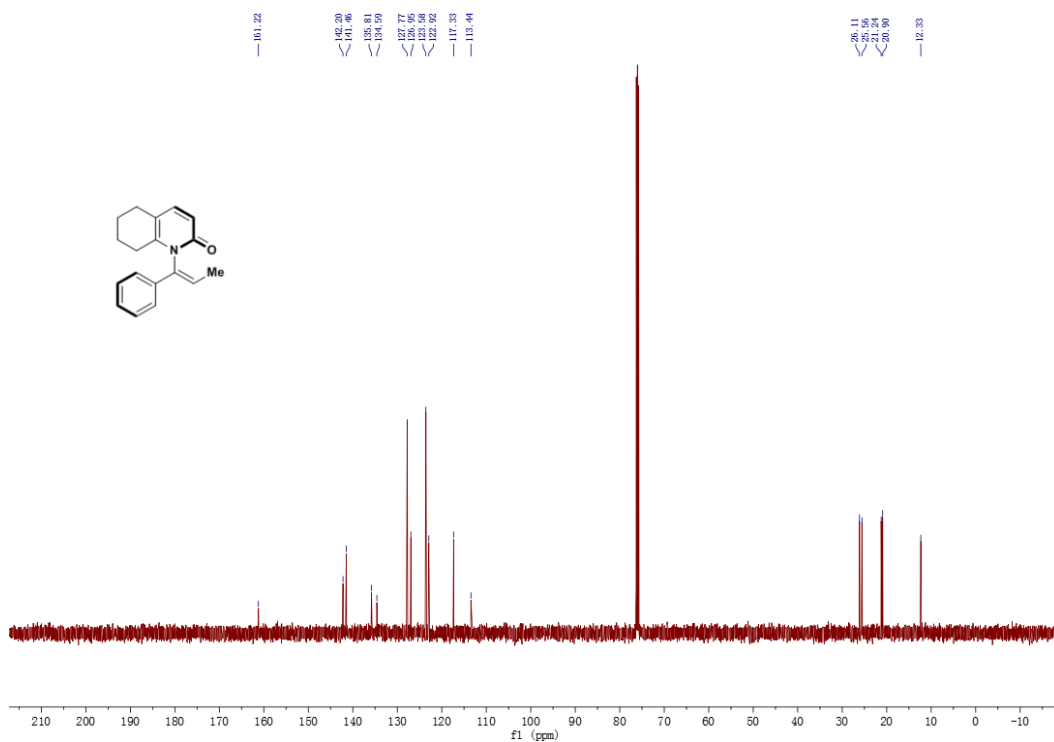

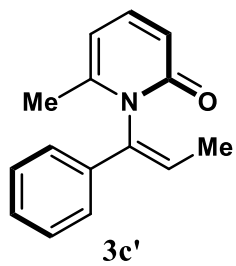

7.38  
7.36  
7.34  
7.32  
7.30  
7.28  
6.61  
6.59  
6.57  
6.16  
6.14

2.10  
2.08  
1.70  
1.68  
1.67

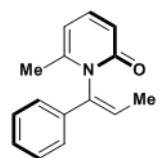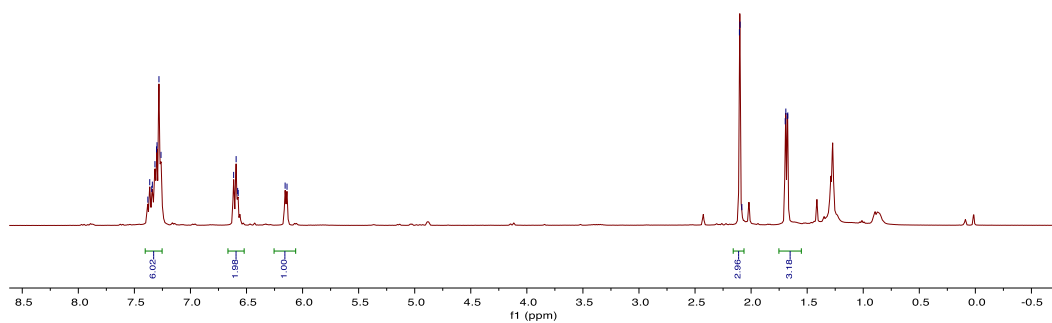

163.03

146.51

139.92

137.15

135.22

128.84

128.13

127.95

118.20

106.39

20.07

11.32

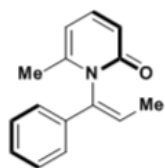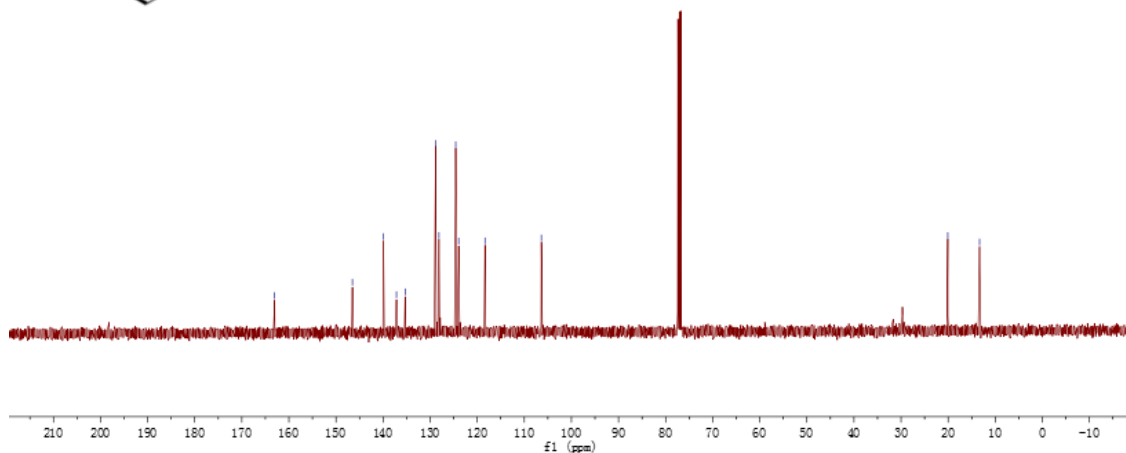

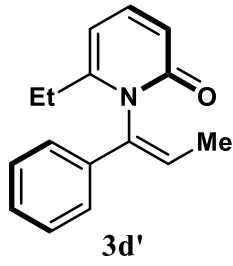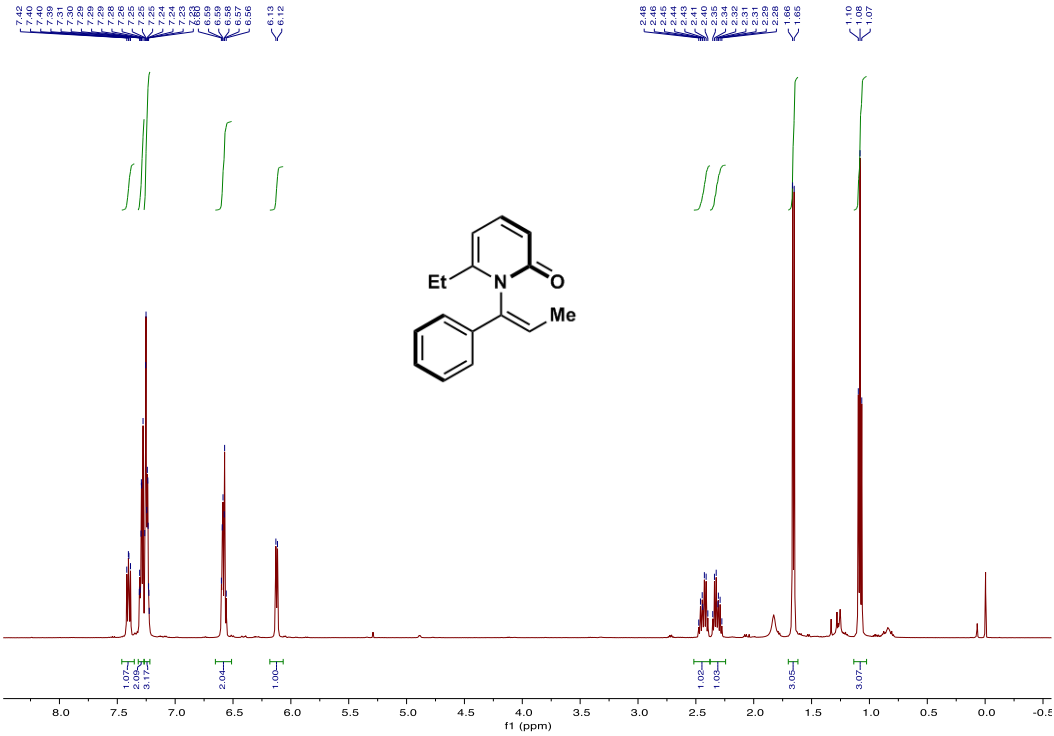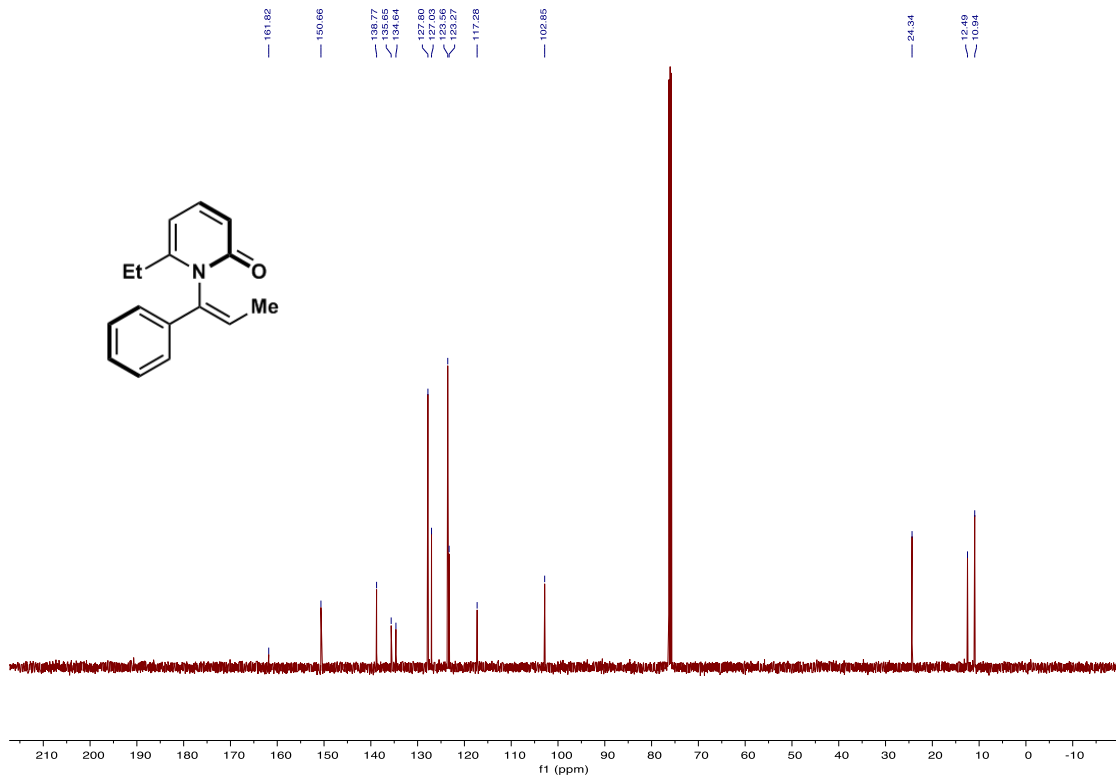

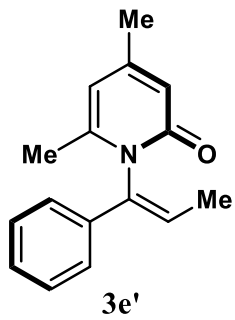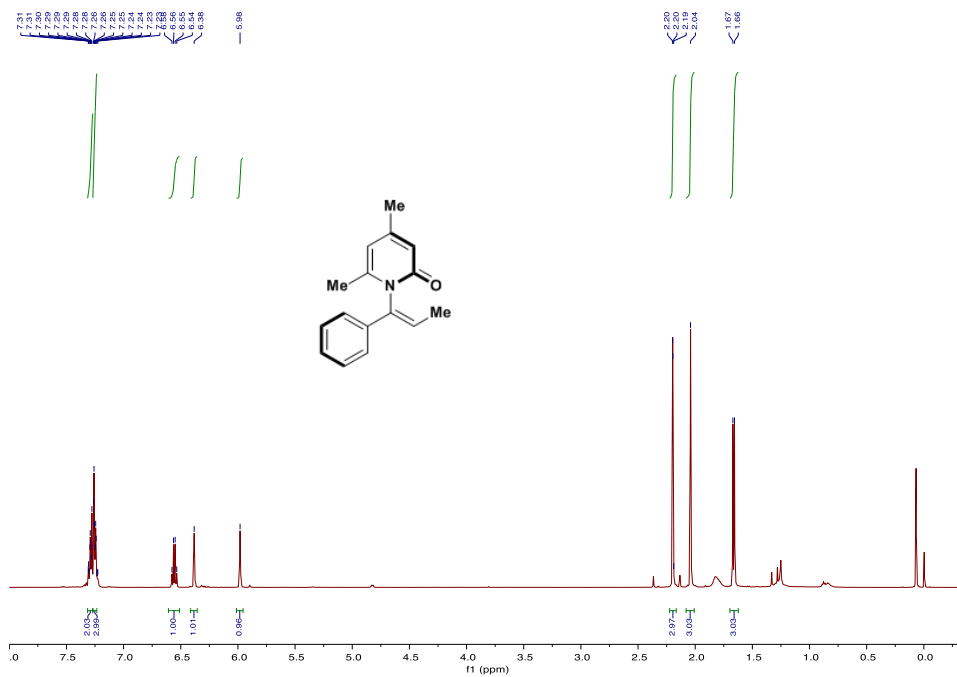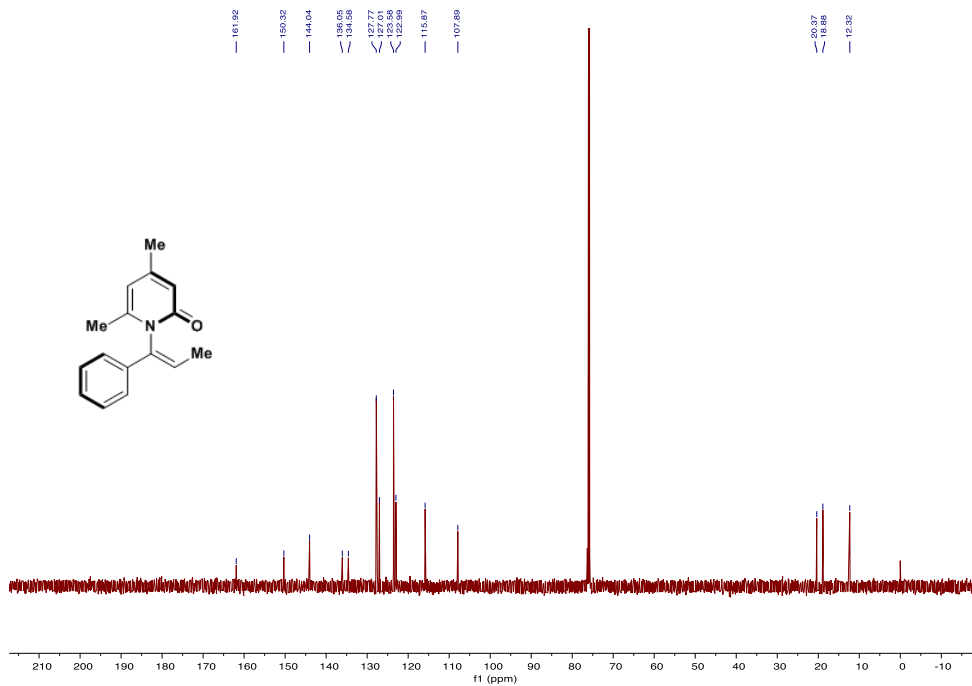

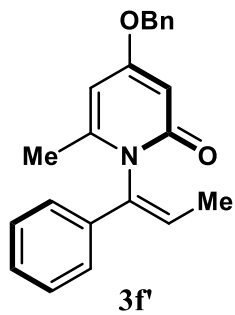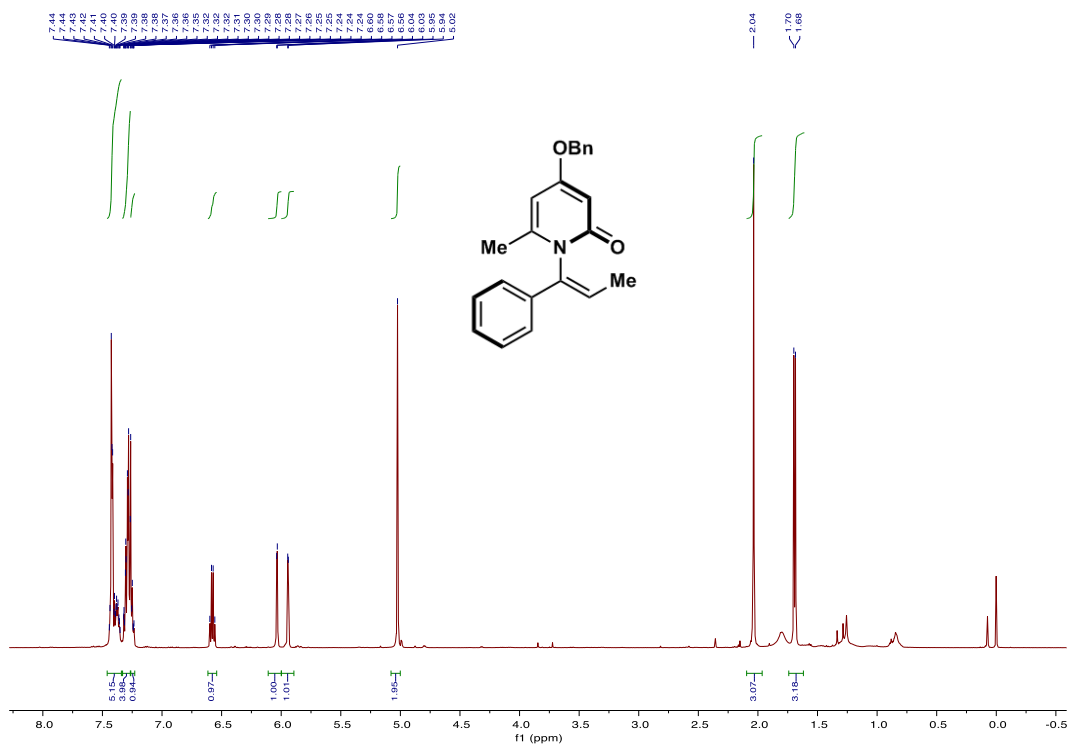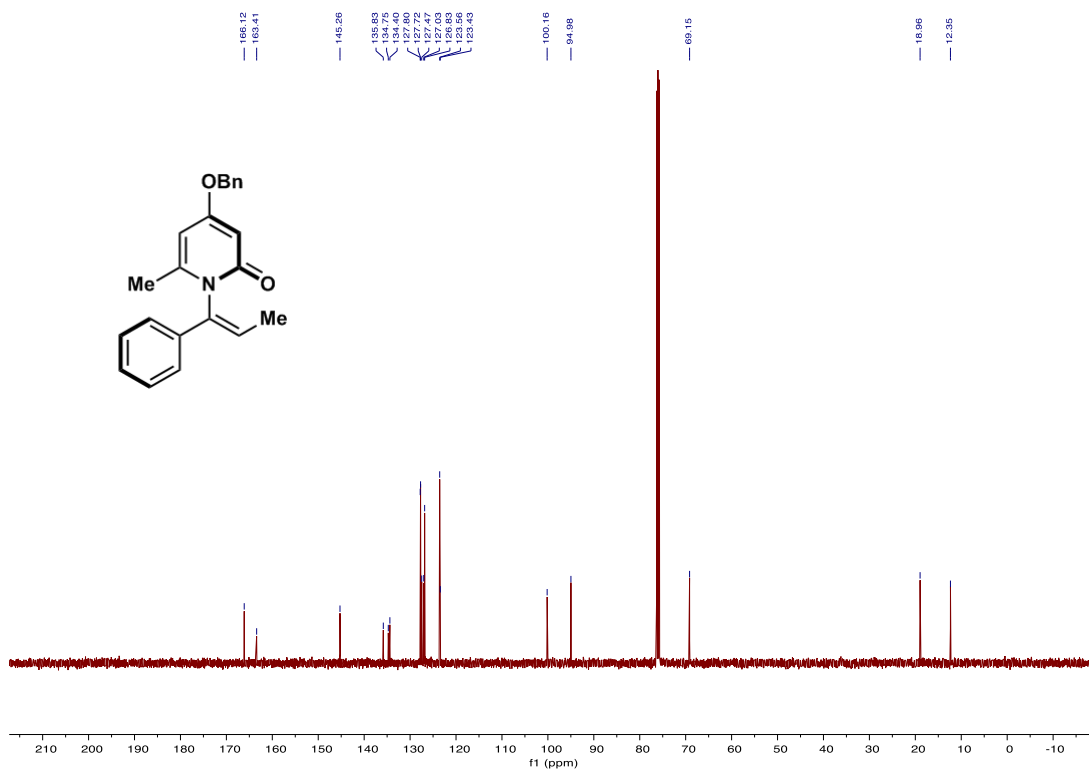

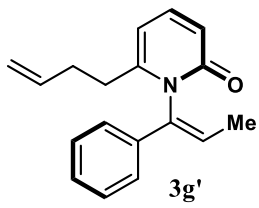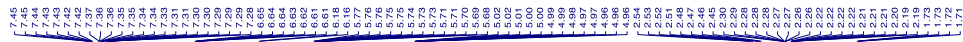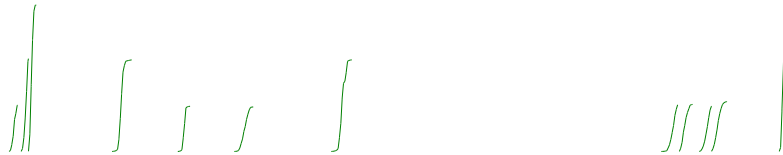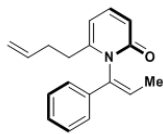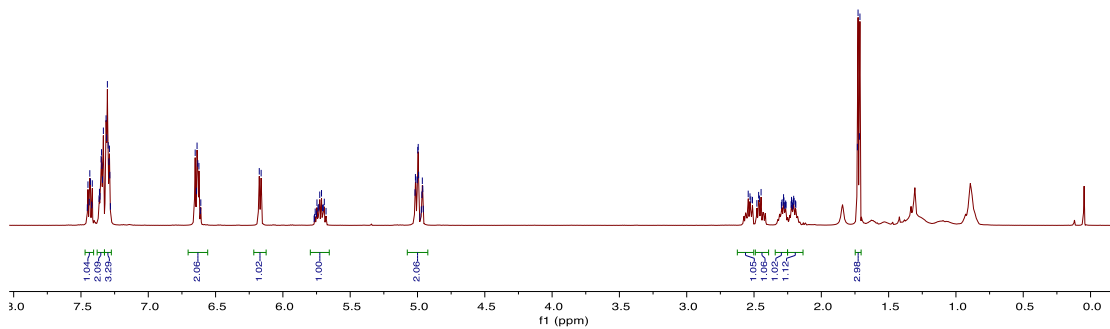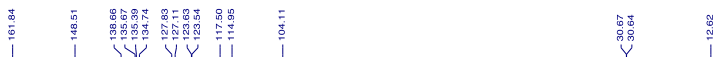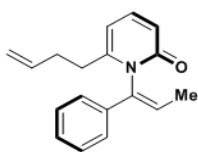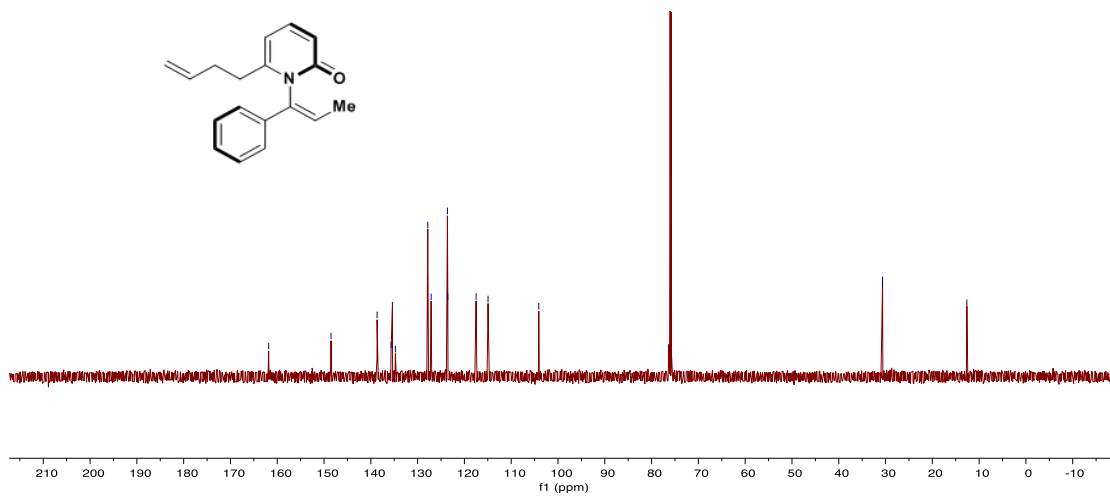



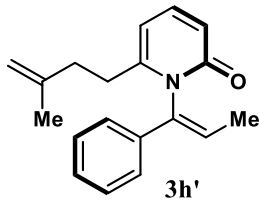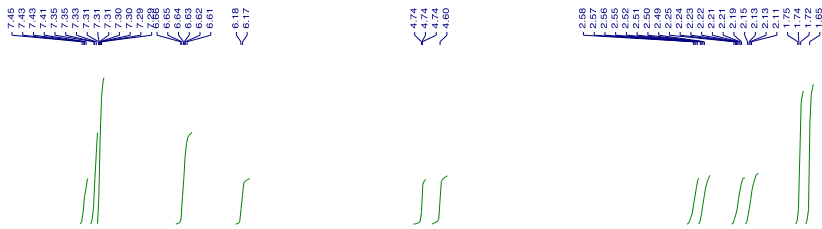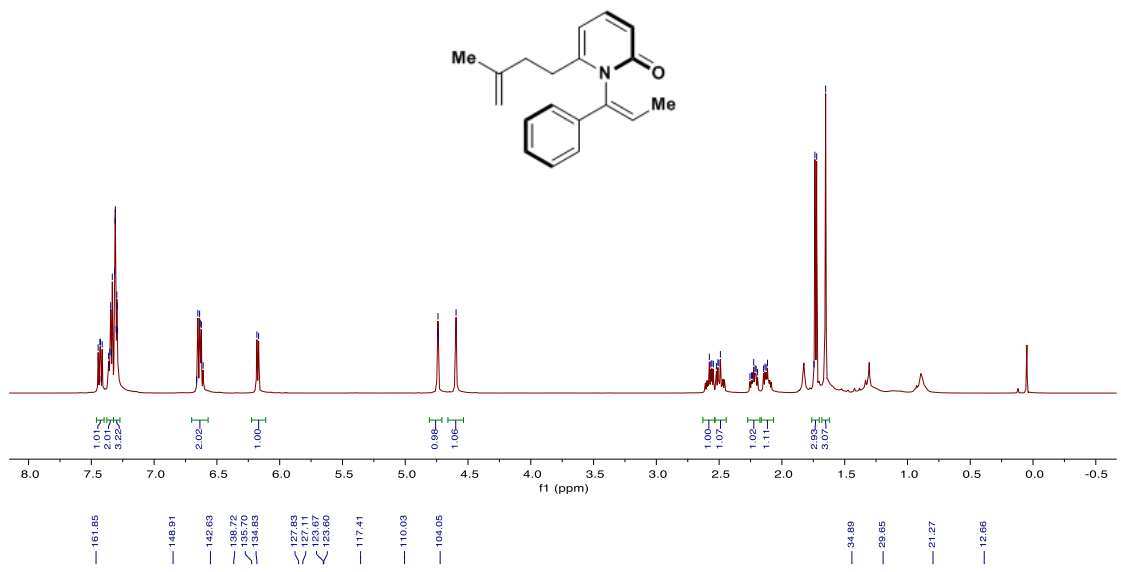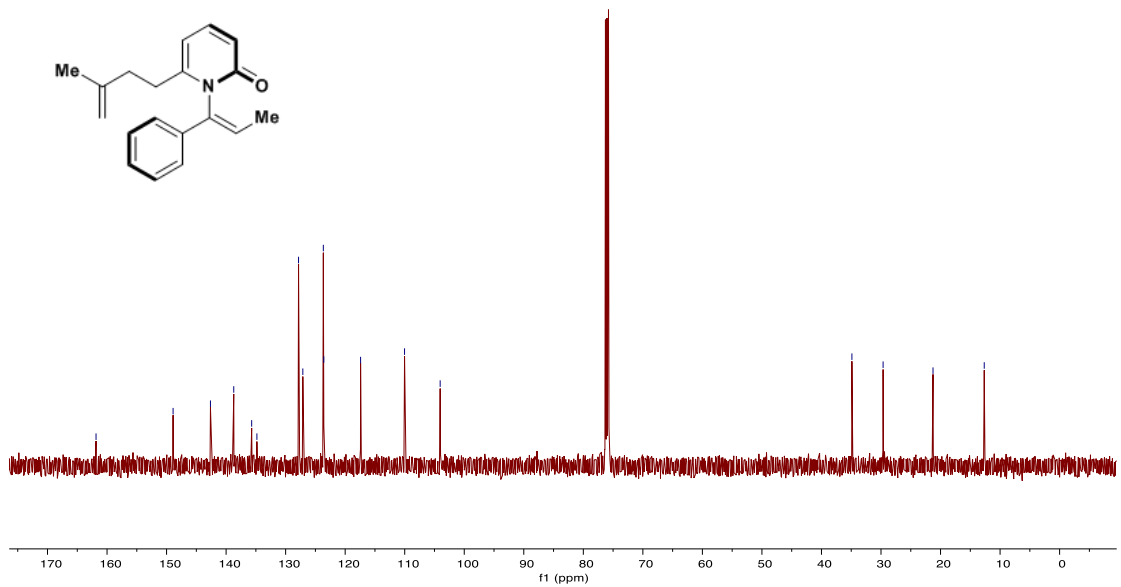

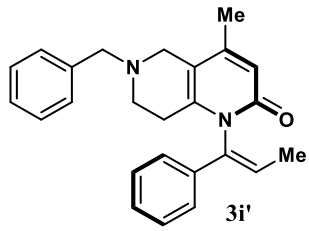

7.40  
7.39  
7.38  
7.35  
7.34  
7.31  
7.30  
7.27  
6.62  
6.61  
6.58  
6.50

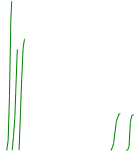

3.82  
3.75  
3.74  
3.53  
3.50  
3.42  
2.76  
2.69  
2.67  
2.60  
2.57  
2.54  
2.53  
2.52  
2.51  
2.48  
2.15  
1.72

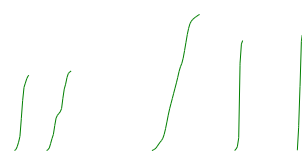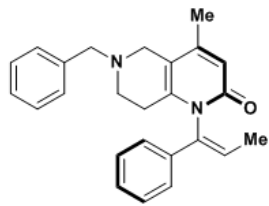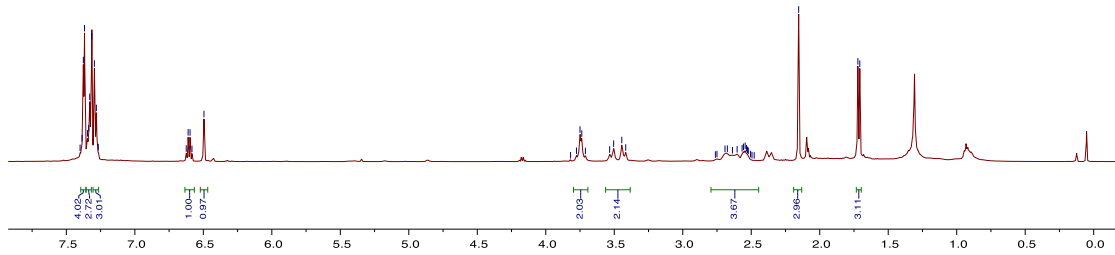

160.75  
148.58  
139.87  
135.46  
134.60  
128.06  
127.79  
127.01  
126.43  
123.44  
116.98  
94.38  
61.25  
50.85  
47.62  
28.69  
26.31  
17.78  
12.45

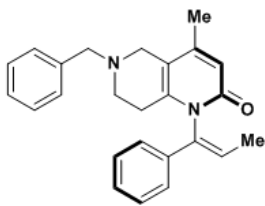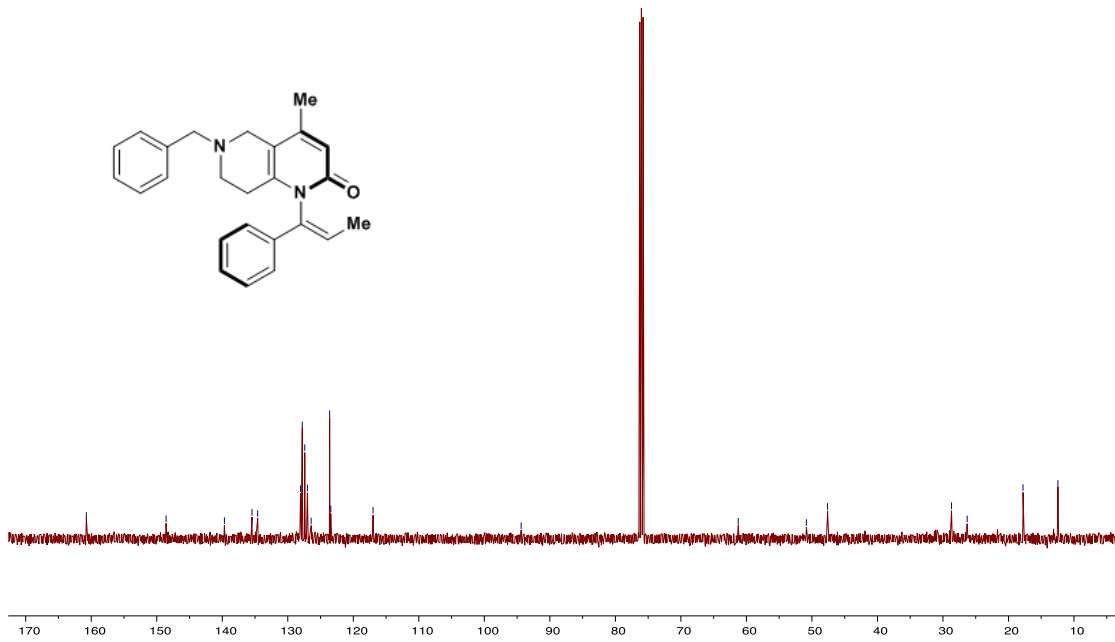

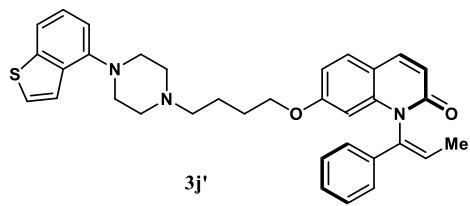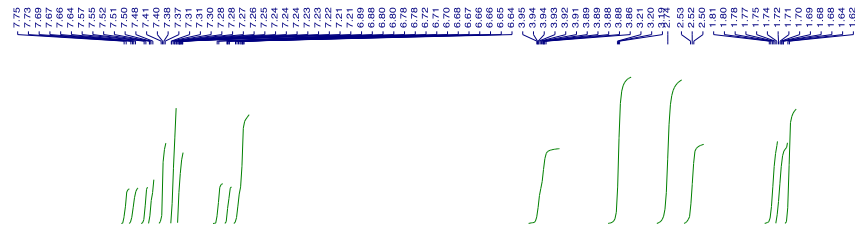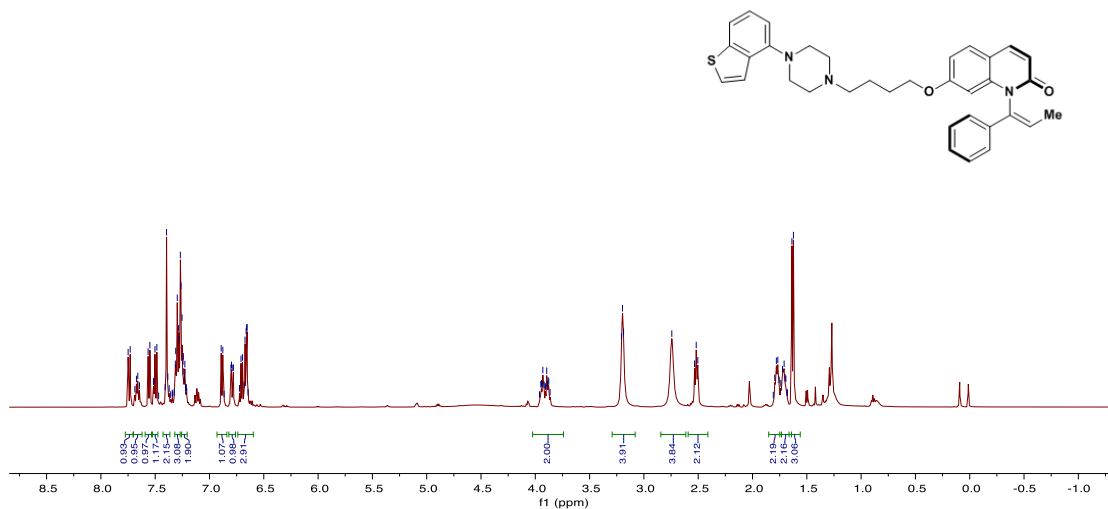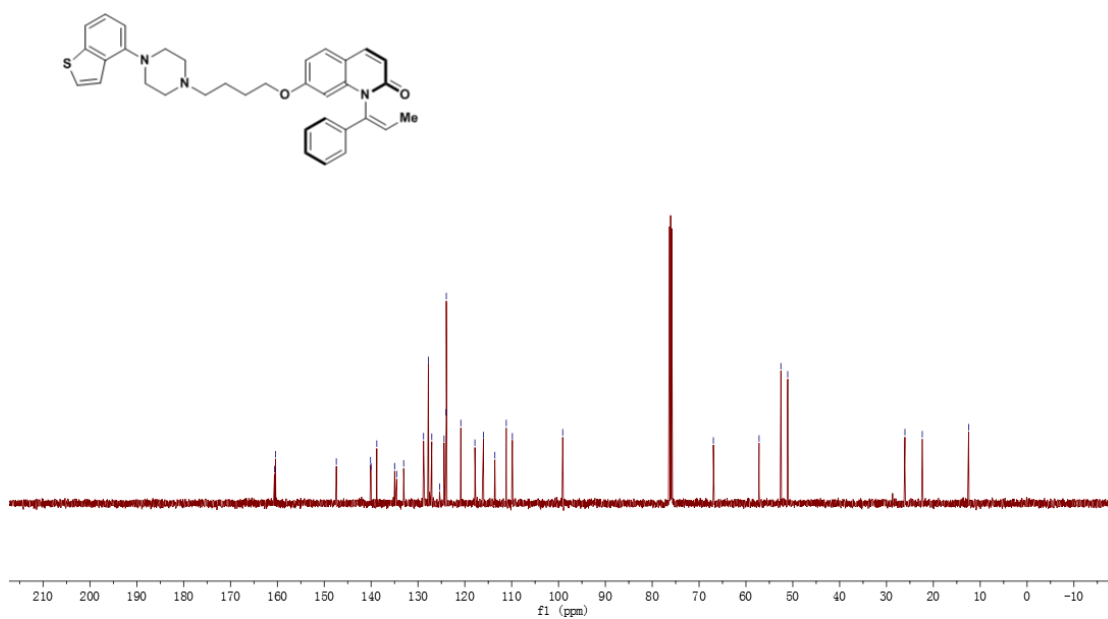

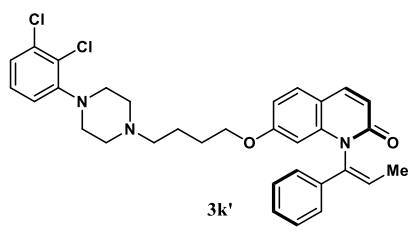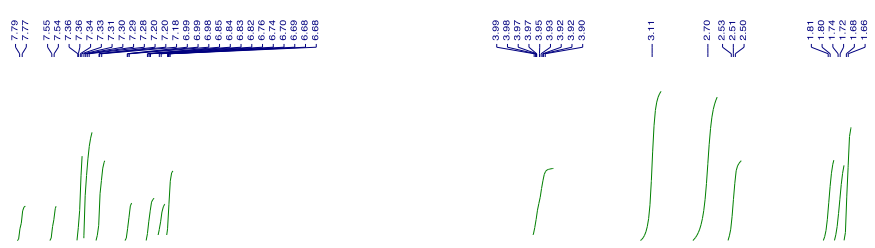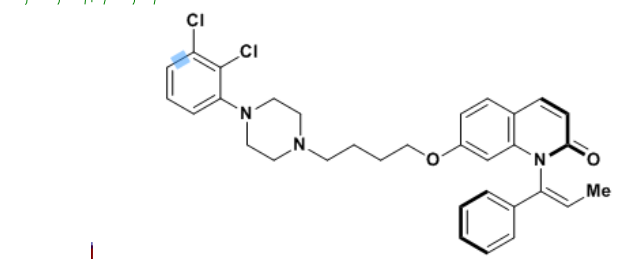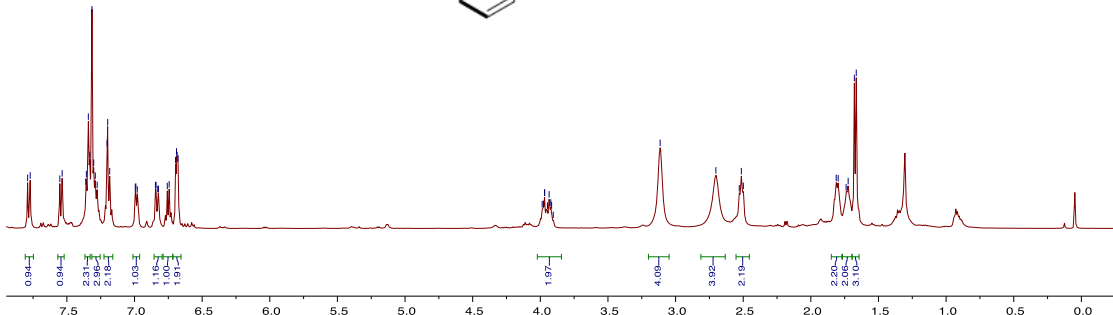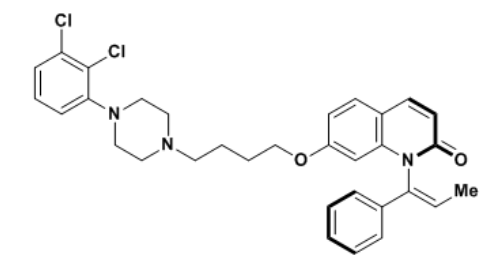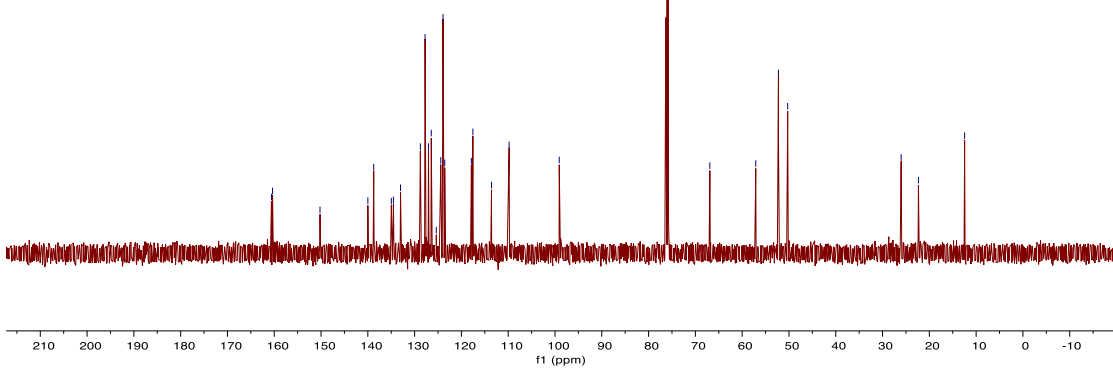

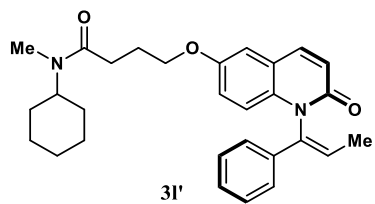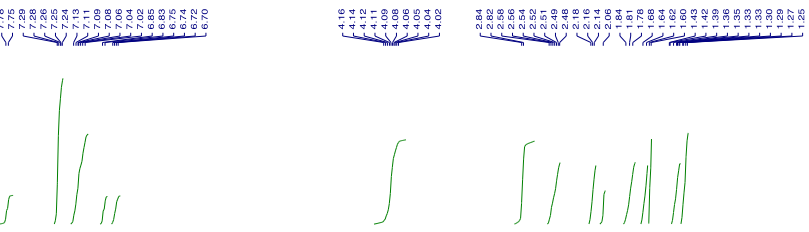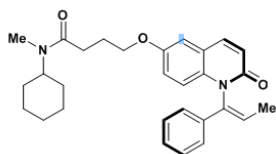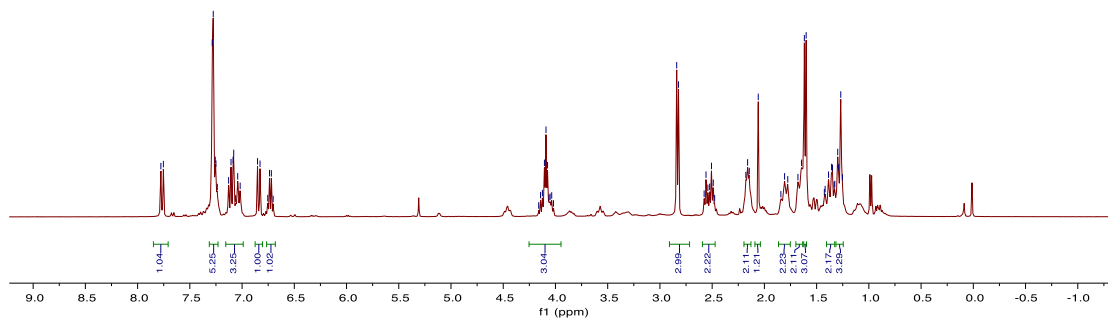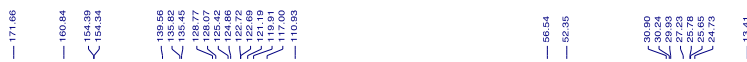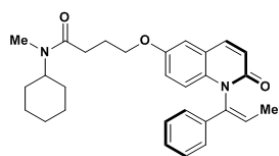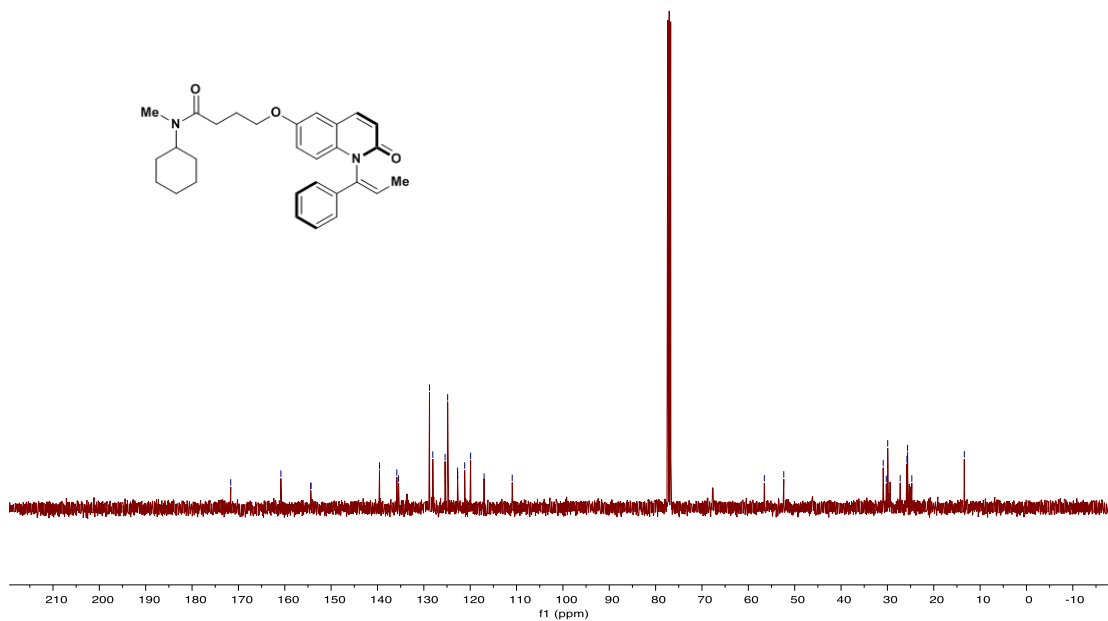

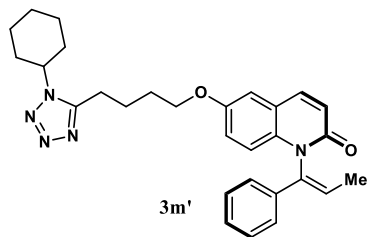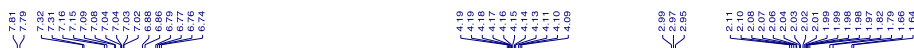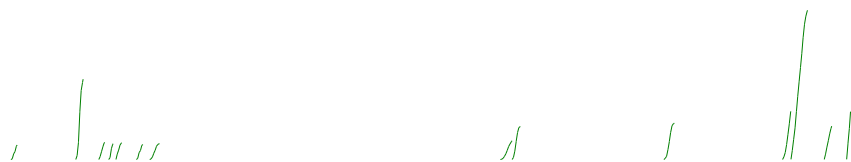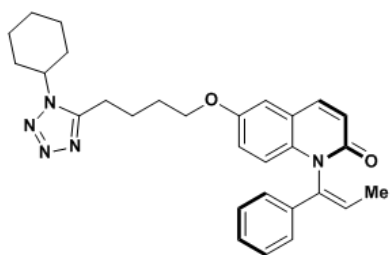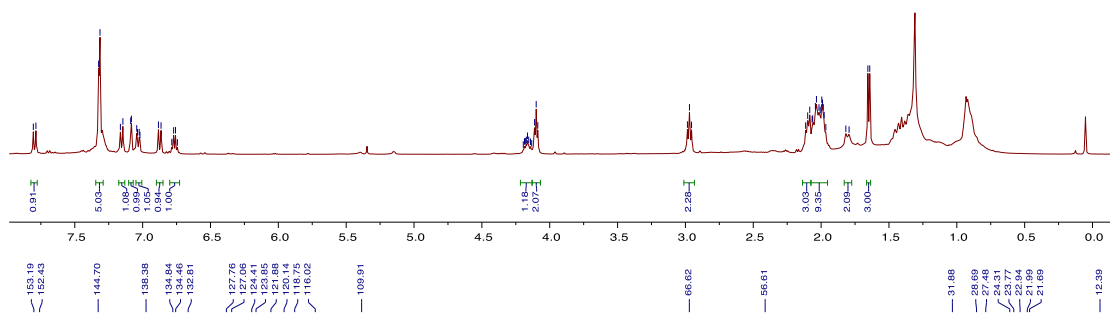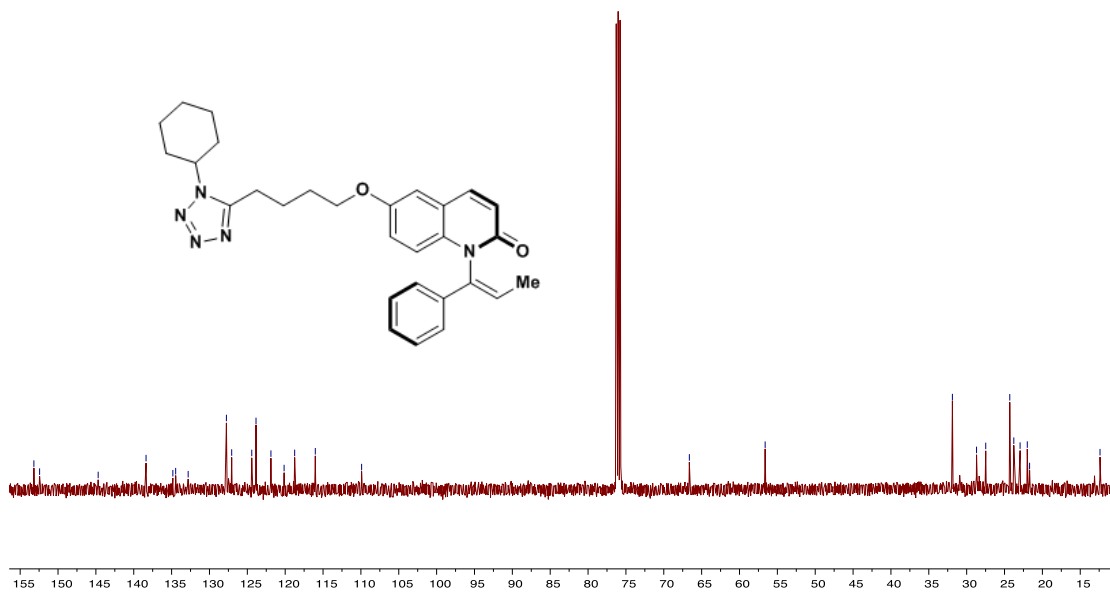

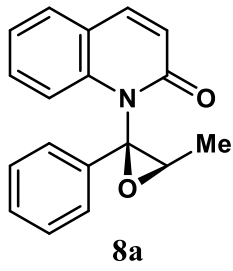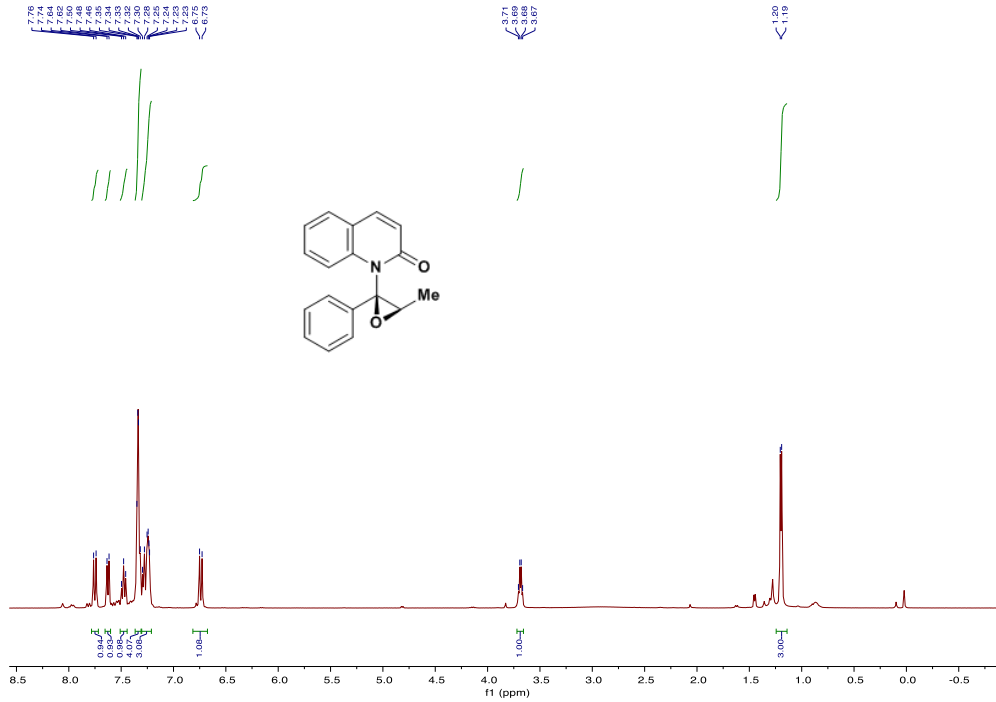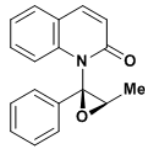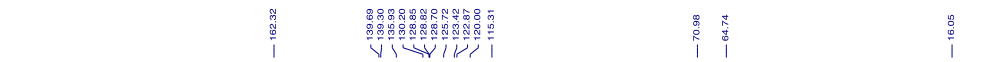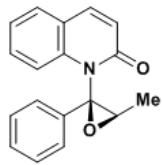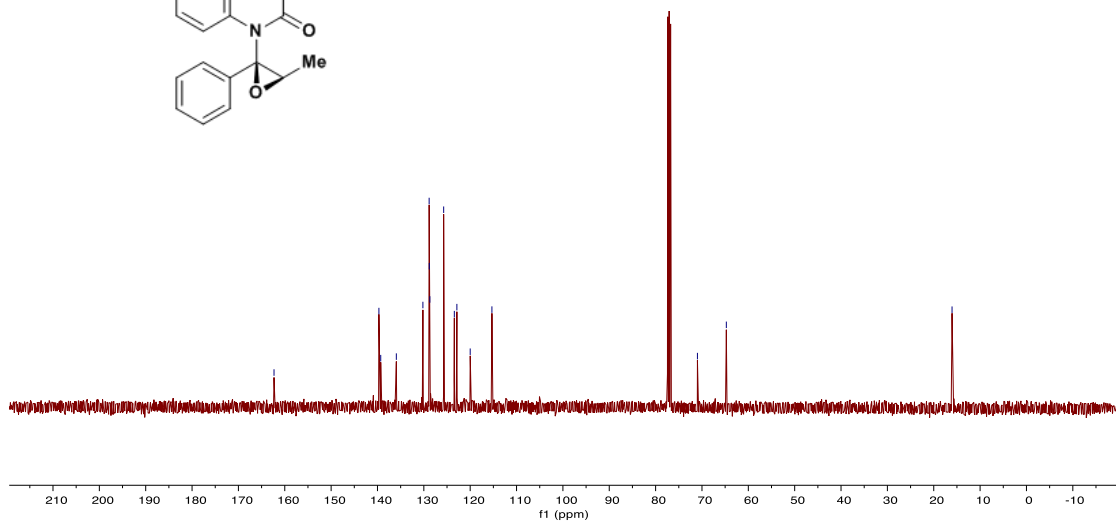

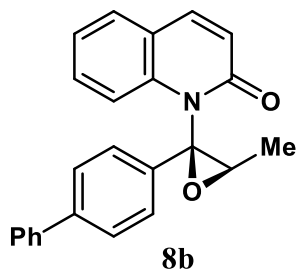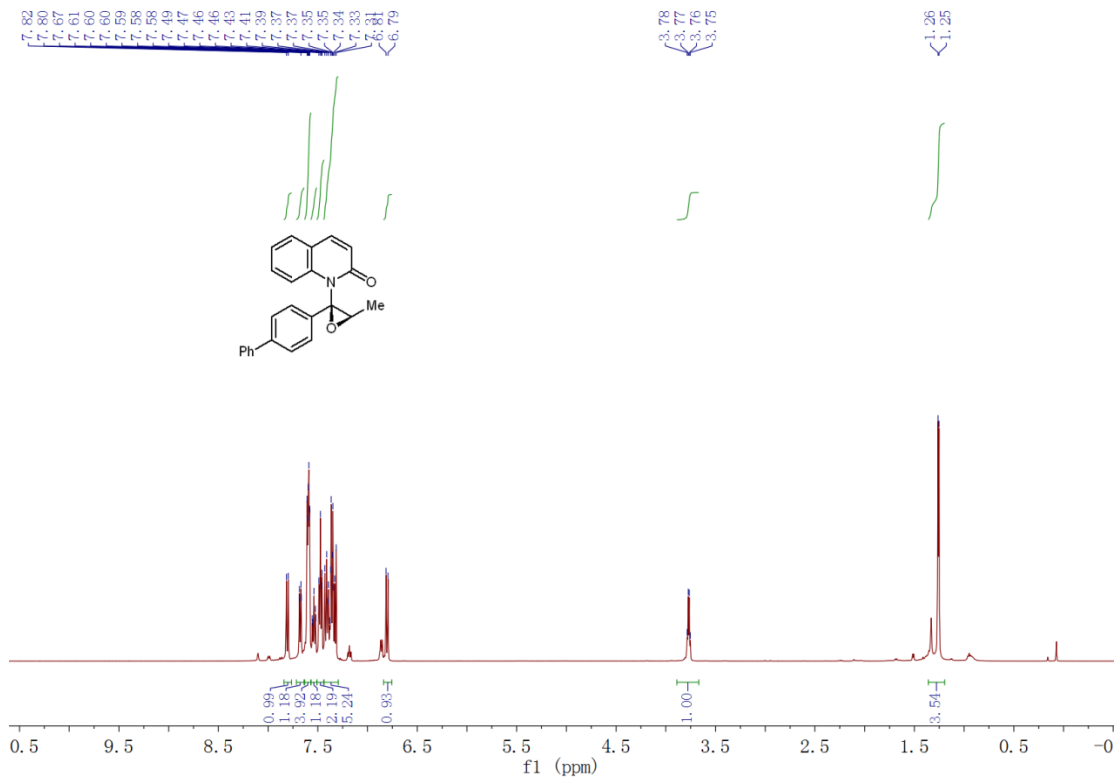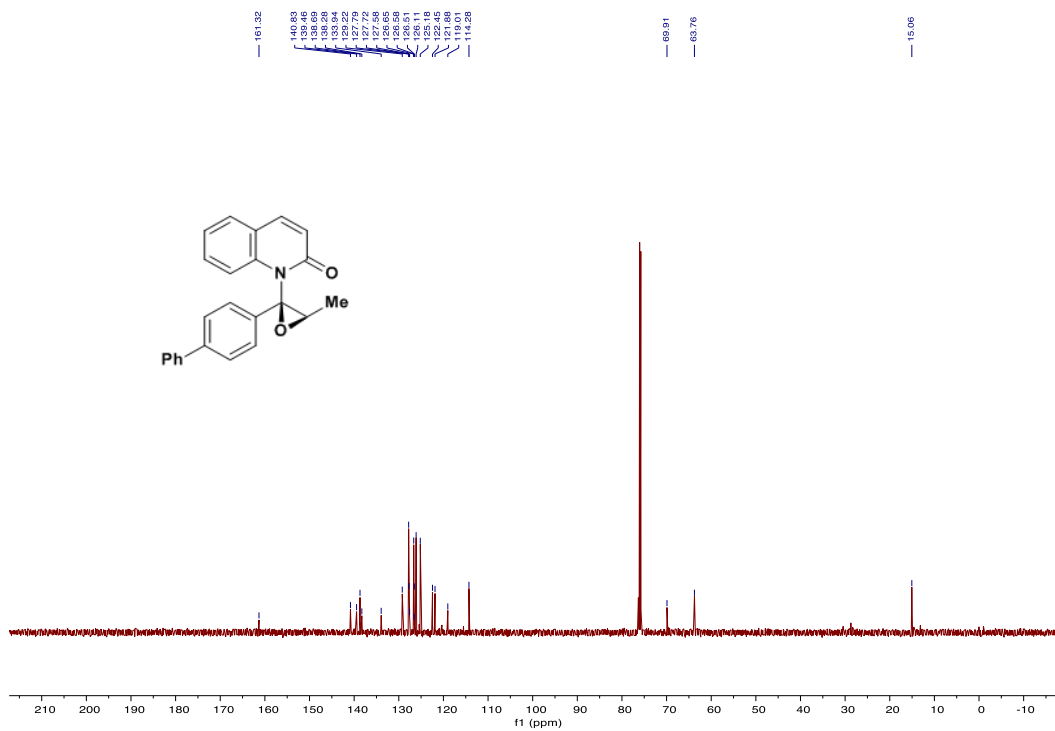



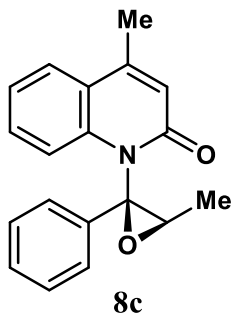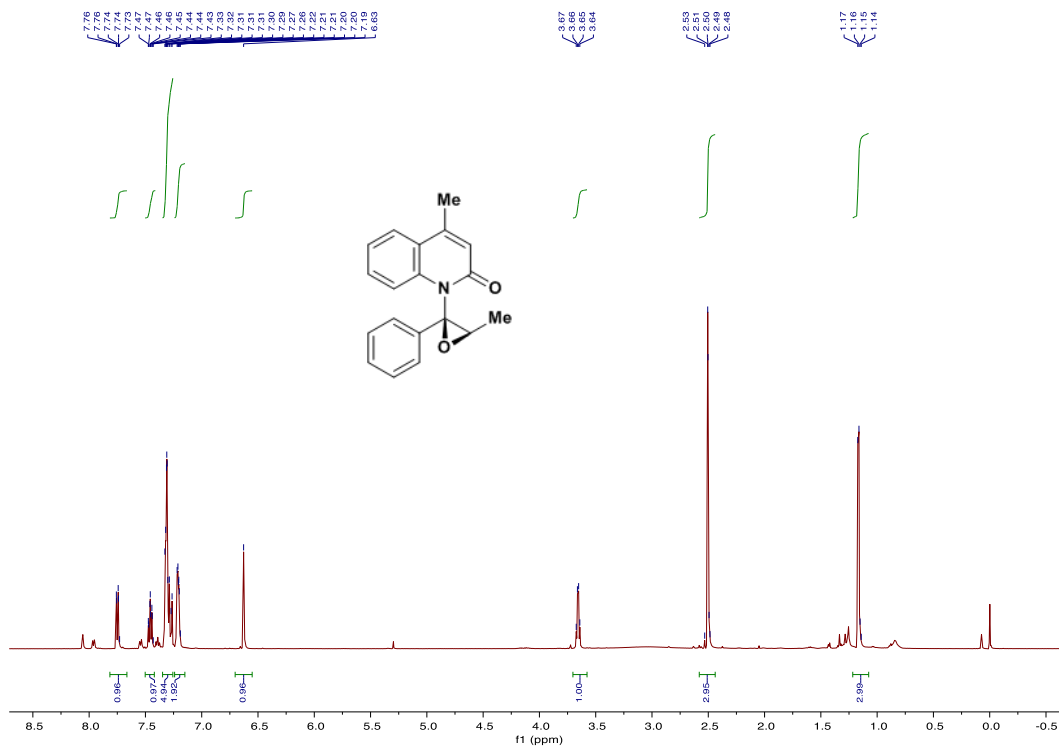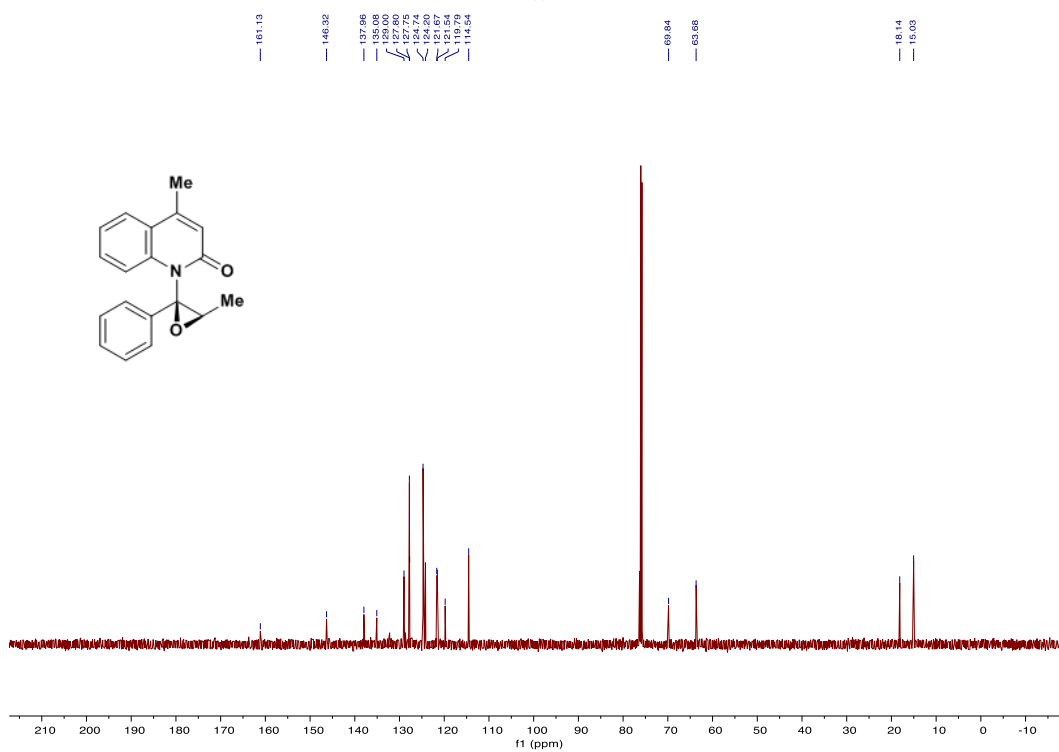

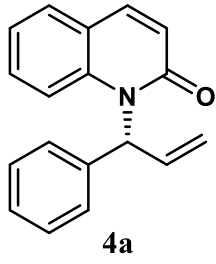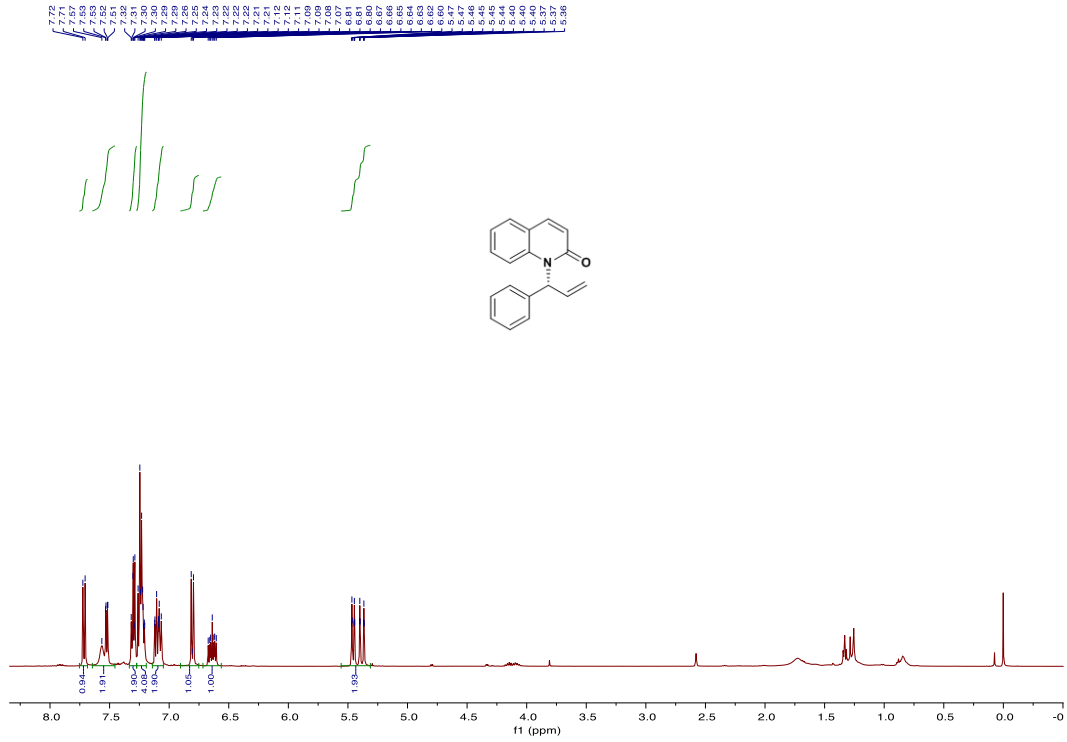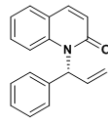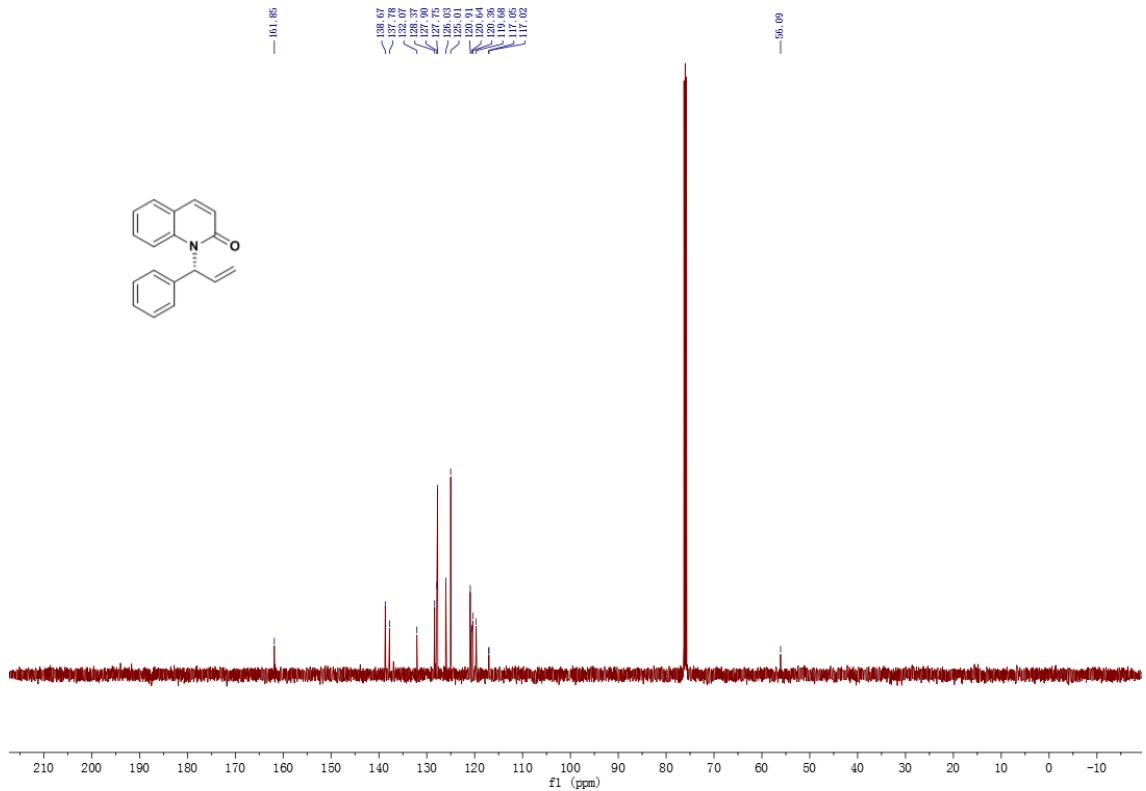

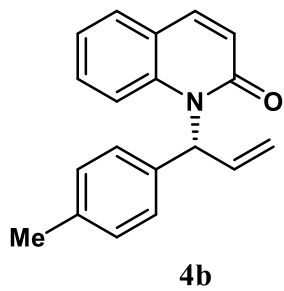

7.71  
7.70  
7.69  
7.55  
7.54  
7.53  
7.52  
7.51  
7.25  
7.24  
7.23  
7.22  
7.21  
7.14  
7.13  
7.12  
7.11  
7.10  
7.09  
6.91  
6.90  
6.66  
6.65  
6.63  
6.61  
6.59  
6.44  
6.44  
6.42  
6.42  
5.37  
5.34  
5.33

-2.30

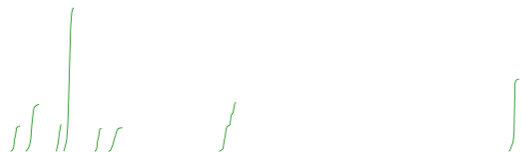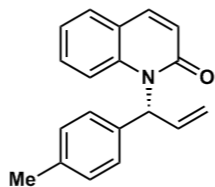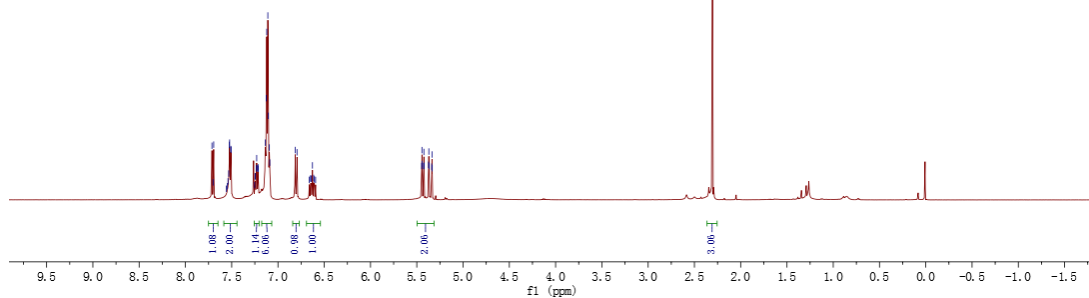

161.89

138.64  
136.60  
135.60  
134.72  
133.43  
129.34  
128.43  
124.98  
120.84  
120.36  
117.27

55.94

20.00

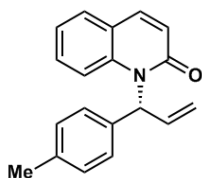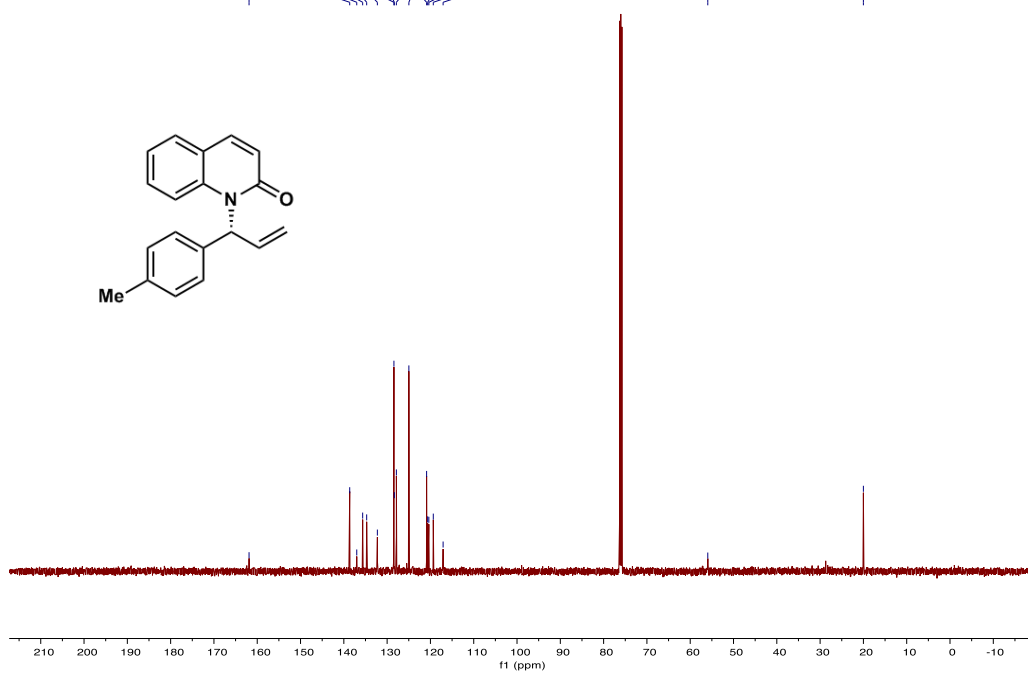

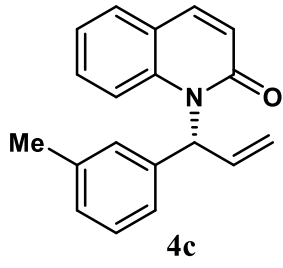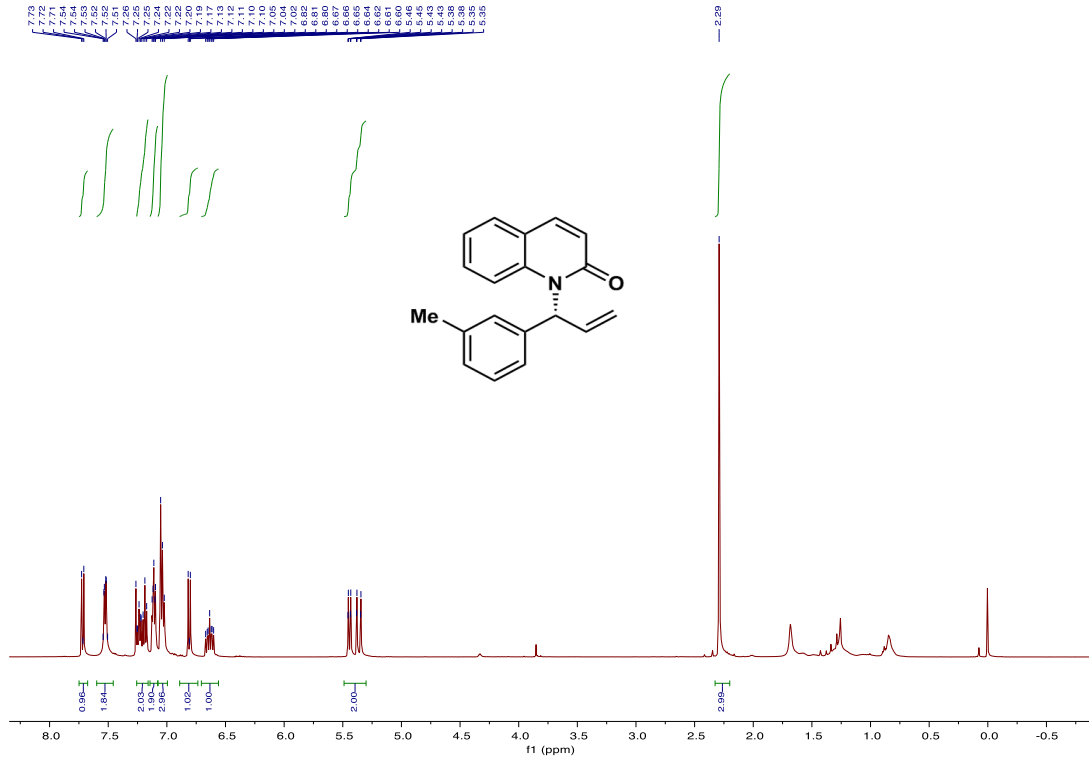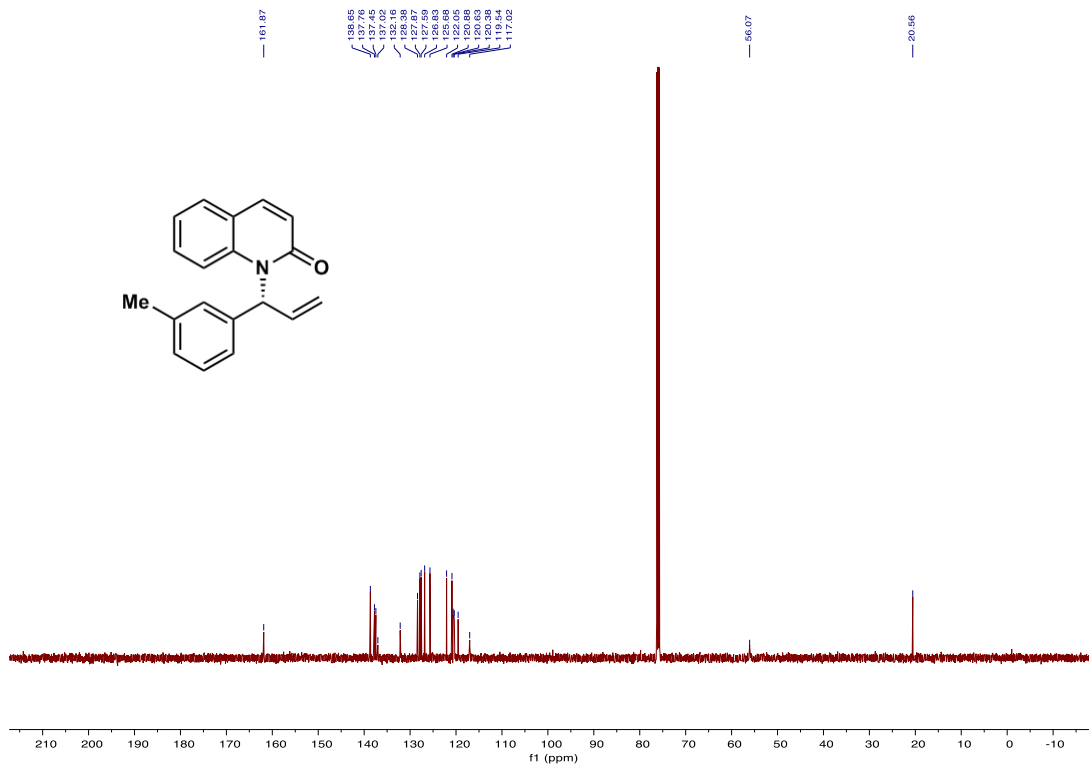

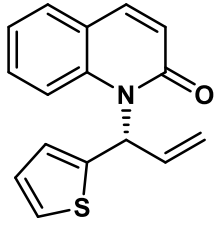

4d

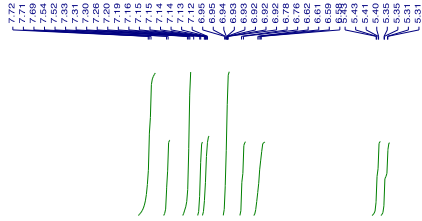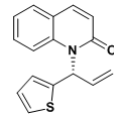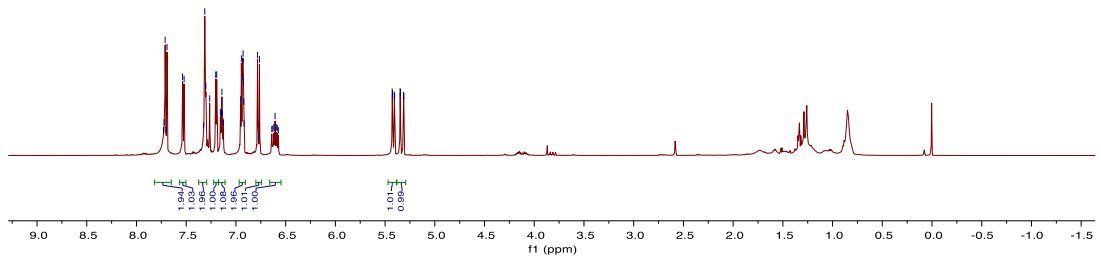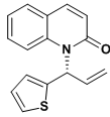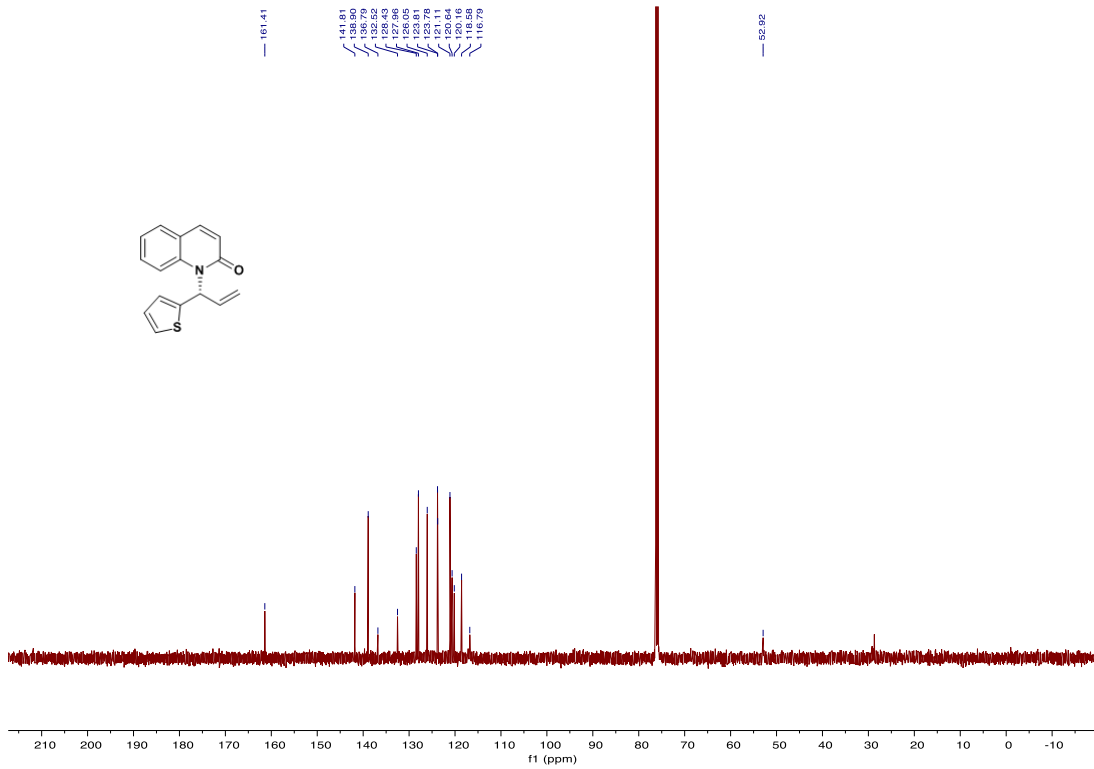

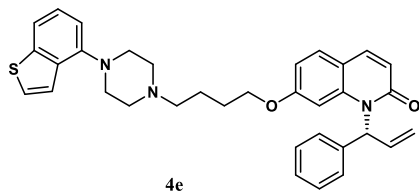

4e

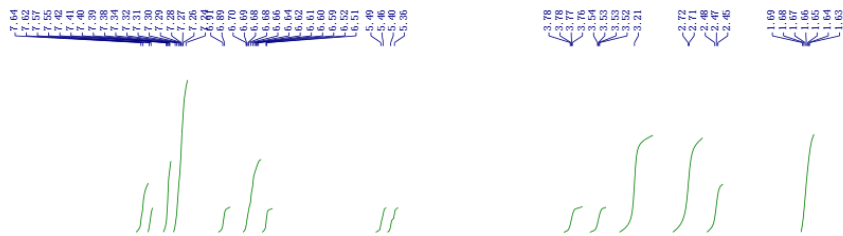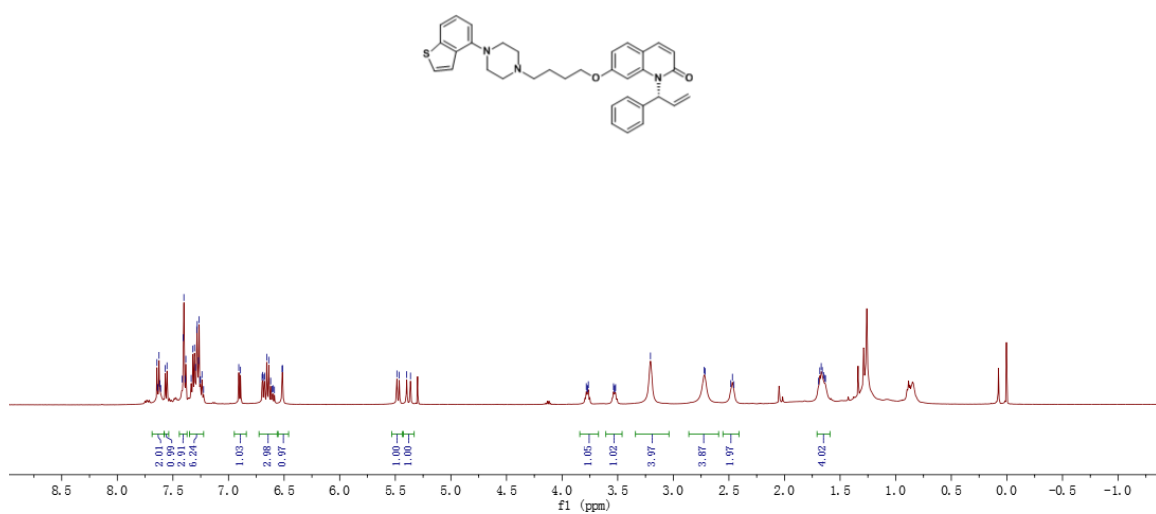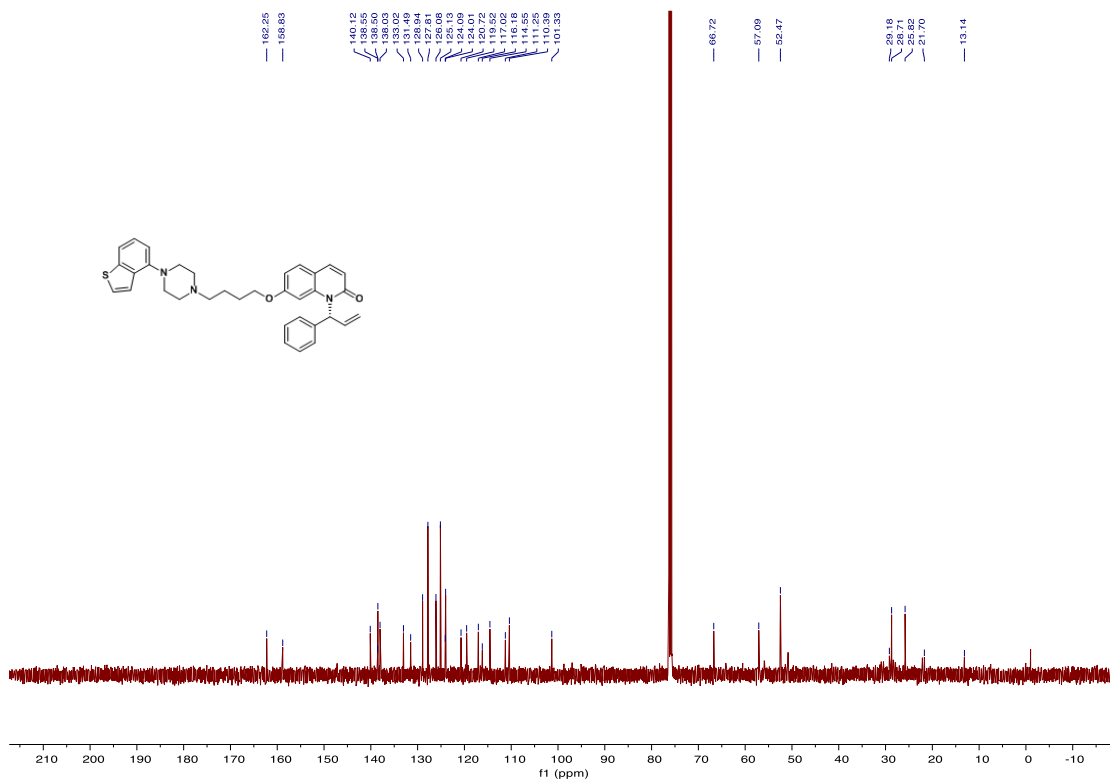

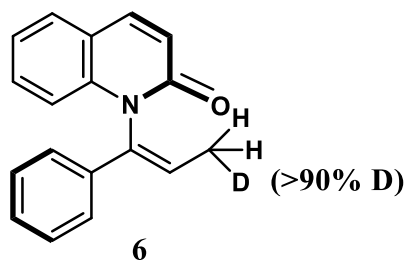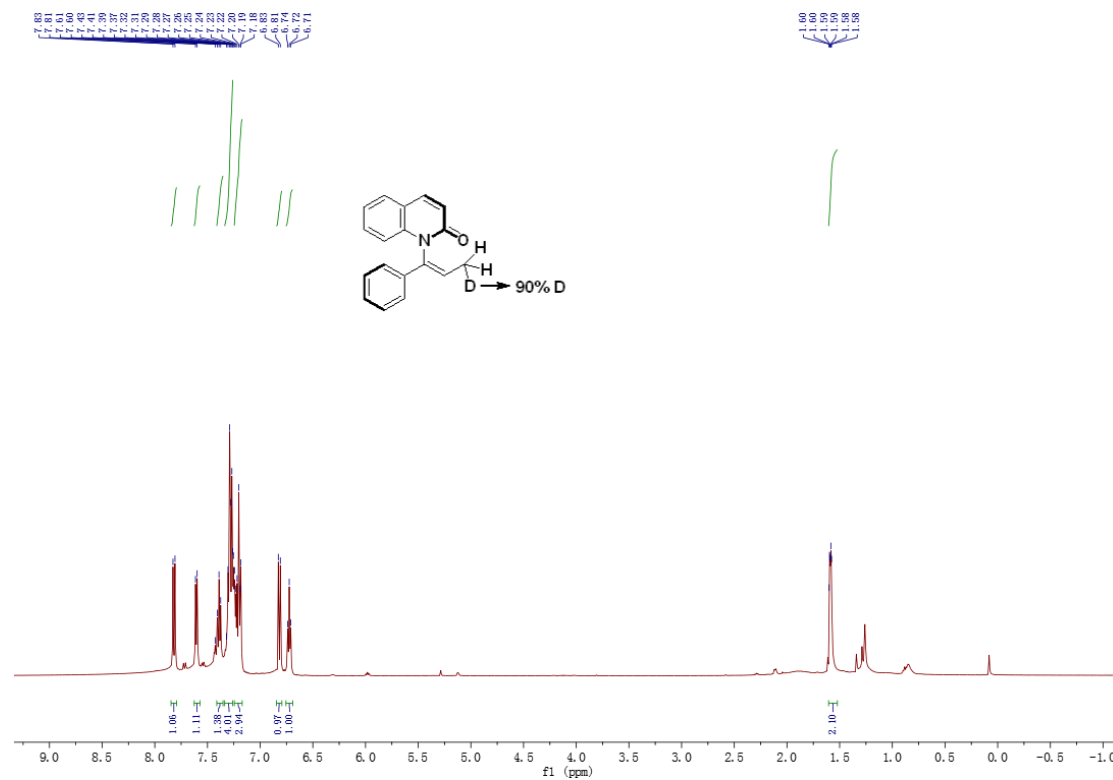

## HPLC data

For comparison of Chinese and English of the HPLC data table.

| 序号    | 峰名称       | 保留时间 (min)           | 峰面积 (mAU*min)       | 峰高 (mAU)          | 相对峰面积 (%)              | 相对峰高 (%)                 | 样品量 n.a.           |
|-------|-----------|----------------------|---------------------|-------------------|------------------------|--------------------------|--------------------|
| Entry | Peak name | Retention time (min) | Peak area (mAU*min) | Peak height (mAU) | Relative peak area (%) | Relative Peak height (%) | Sample volume n.a. |

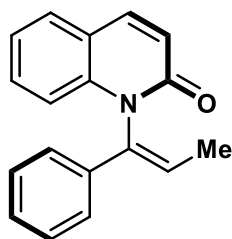

3a

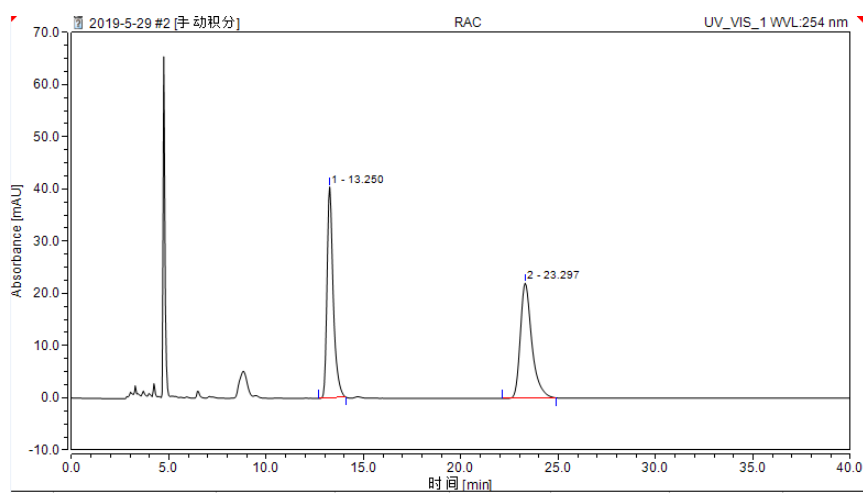

积分结果

| 序号 | 峰名称 | 保留时间 min | 峰面积 mAU*min | 峰高 mAU | 相对峰面积 % | 相对峰高 % | 样品量 n.a. |
|----|-----|----------|-------------|--------|---------|--------|----------|
| 1  |     | 13.250   | 14.874      | 40.403 | 49.66   | 64.70  | n.a.     |
| 2  |     | 23.297   | 15.078      | 22.039 | 50.34   | 35.30  | n.a.     |

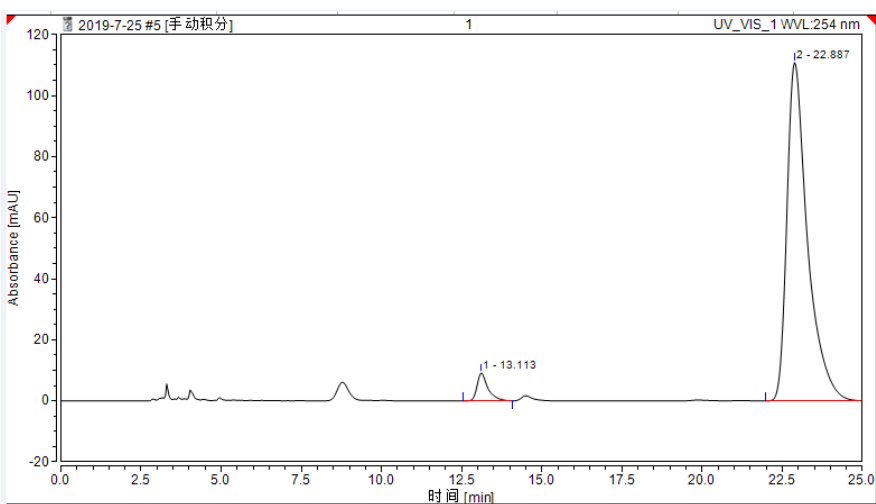

积分结果

| 序号 | 峰名称 | 保留时间 min | 峰面积 mAU*min | 峰高 mAU  | 相对峰面积 % | 相对峰高 % | 样品量 n.a. |
|----|-----|----------|-------------|---------|---------|--------|----------|
| 1  |     | 13.113   | 3.567       | 9.131   | 4.15    | 7.61   | n.a.     |
| 2  |     | 22.887   | 82.397      | 110.897 | 95.85   | 92.39  | n.a.     |



For comparison of Chinese and English of the HPLC data table.

| 序号    | 峰名<br>称      | 保留时间<br>(min)           | 峰面积<br>(mAU*min)       | 峰高<br>(mAU)             | 相对峰面<br>积 (%)                | 相对峰高<br>(%)                    | 样品量<br>n.a.              |
|-------|--------------|-------------------------|------------------------|-------------------------|------------------------------|--------------------------------|--------------------------|
| Entry | Peak<br>name | Retention<br>time (min) | Peak area<br>(mAU*min) | Peak<br>height<br>(mAU) | Relative<br>peak area<br>(%) | Relative<br>Peak height<br>(%) | Sample<br>volume<br>n.a. |

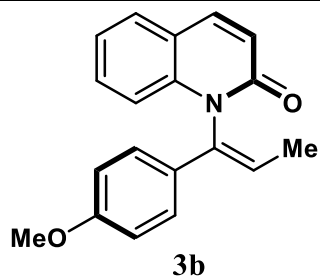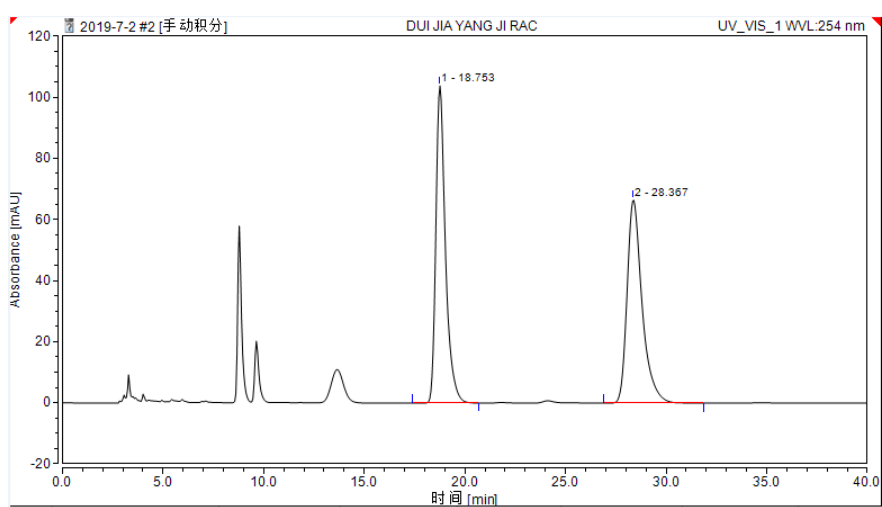

| 积分结果 |     |             |                |           |            |           |             |
|------|-----|-------------|----------------|-----------|------------|-----------|-------------|
| 序号   | 峰名称 | 保留时间<br>min | 峰面积<br>mAU*min | 峰高<br>mAU | 相对峰面积<br>% | 相对峰高<br>% | 样品量<br>n.a. |
| 1    |     | 18.753      | 57.341         | 103.907   | 49.98      | 60.94     | n.a.        |
| 2    |     | 28.367      | 57.386         | 66.597    | 50.02      | 39.06     | n.a.        |

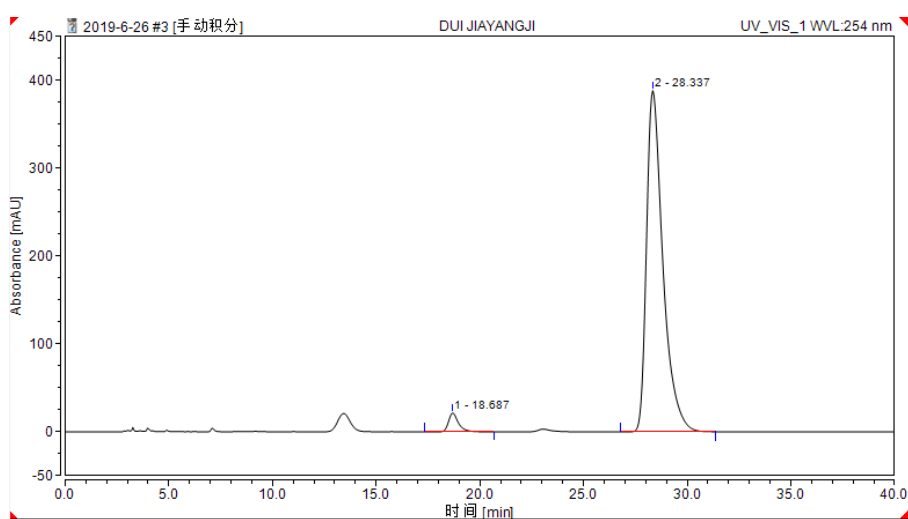

| 积分结果 |     |             |                |           |            |           |             |
|------|-----|-------------|----------------|-----------|------------|-----------|-------------|
| 序号   | 峰名称 | 保留时间<br>min | 峰面积<br>mAU*min | 峰高<br>mAU | 相对峰面积<br>% | 相对峰高<br>% | 样品量<br>n.a. |
| 1    |     | 18.687      | 11.772         | 21.395    | 3.21       | 5.22      | n.a.        |
| 2    |     | 28.337      | 355.032        | 388.501   | 96.79      | 94.78     | n.a.        |

For comparison of Chinese and English of the HPLC data table.

| 序号    | 峰名称       | 保留时间 (min)           | 峰面积 (mAU*min)       | 峰高 (mAU)          | 相对峰面积 (%)              | 相对峰高 (%)                 | 样品量 n.a.           |
|-------|-----------|----------------------|---------------------|-------------------|------------------------|--------------------------|--------------------|
| Entry | Peak name | Retention time (min) | Peak area (mAU*min) | Peak height (mAU) | Relative peak area (%) | Relative Peak height (%) | Sample volume n.a. |

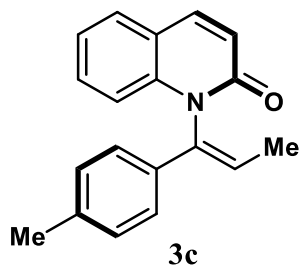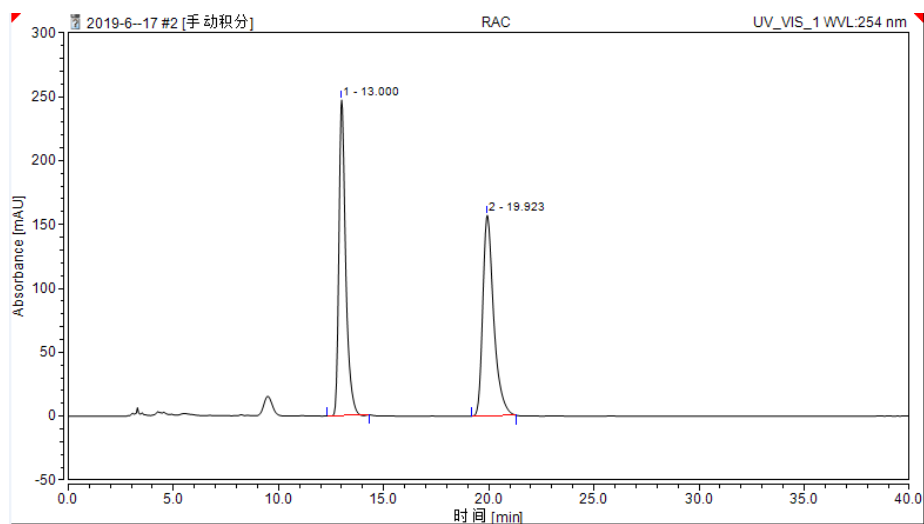

| 积分结果 |     |          |             |         |         |        |          |
|------|-----|----------|-------------|---------|---------|--------|----------|
| 序号   | 峰名称 | 保留时间 min | 峰面积 mAU*min | 峰高 mAU  | 相对峰面积 % | 相对峰高 % | 样品量 n.a. |
| 1    |     | 13.000   | 92.054      | 247.047 | 49.32   | 61.14  | n.a.     |
| 2    |     | 19.923   | 94.583      | 156.988 | 50.68   | 38.86  | n.a.     |

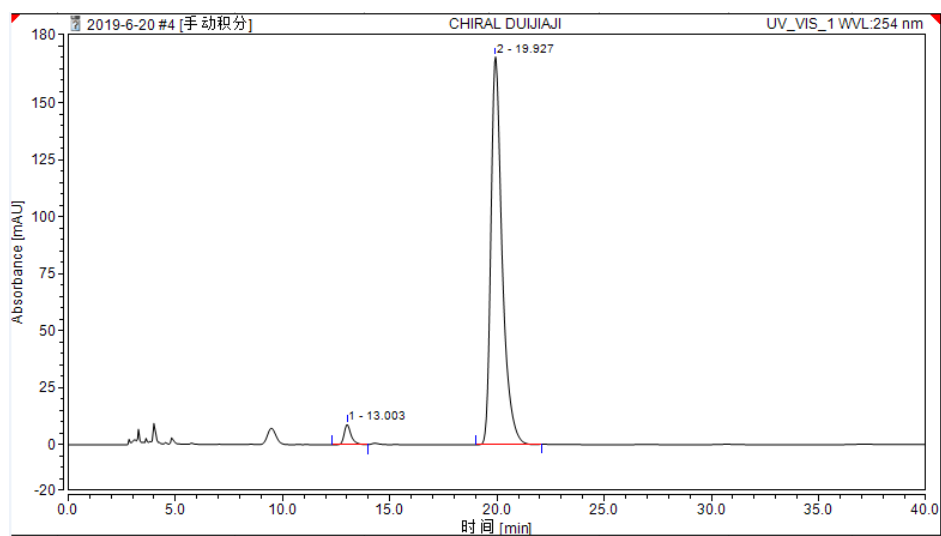

| 积分结果 |     |          |             |         |         |        |          |
|------|-----|----------|-------------|---------|---------|--------|----------|
| 序号   | 峰名称 | 保留时间 min | 峰面积 mAU*min | 峰高 mAU  | 相对峰面积 % | 相对峰高 % | 样品量 n.a. |
| 1    |     | 13.003   | 3.280       | 8.831   | 3.08    | 4.93   | n.a.     |
| 2    |     | 19.927   | 103.207     | 170.194 | 96.92   | 95.07  | n.a.     |

For comparison of Chinese and English of the HPLC data table.

| 序号    | 峰名<br>称      | 保留时间<br>(min)           | 峰面积<br>(mAU*min)       | 峰高<br>(mAU)             | 相对峰面<br>积 (%)                | 相对峰高<br>(%)                    | 样品量<br>n.a.              |
|-------|--------------|-------------------------|------------------------|-------------------------|------------------------------|--------------------------------|--------------------------|
| Entry | Peak<br>name | Retention<br>time (min) | Peak area<br>(mAU*min) | Peak<br>height<br>(mAU) | Relative<br>peak area<br>(%) | Relative<br>Peak height<br>(%) | Sample<br>volume<br>n.a. |

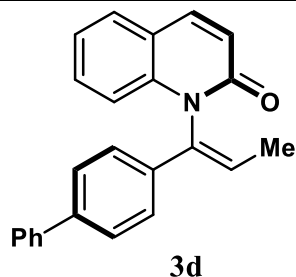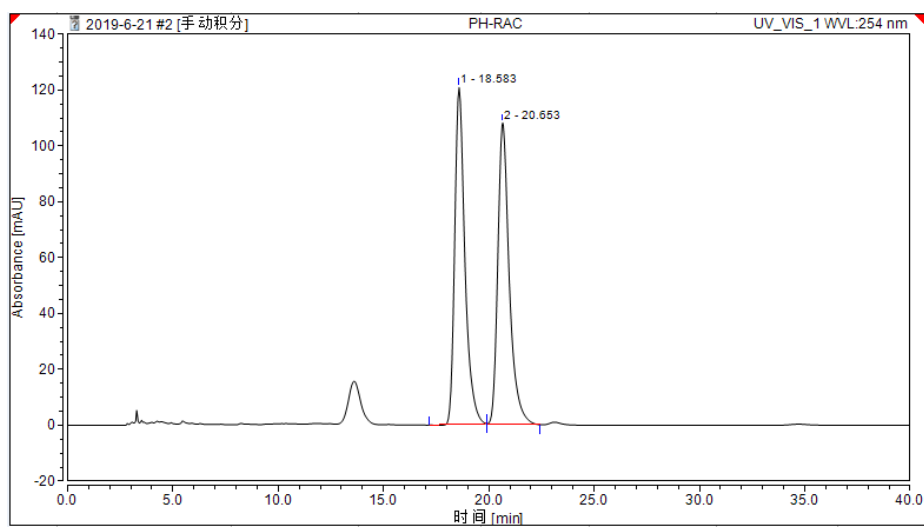

| 积分结果 |     |             |                |           |            |           |             |
|------|-----|-------------|----------------|-----------|------------|-----------|-------------|
| 序号   | 峰名称 | 保留时间<br>min | 峰面积<br>mAU*min | 峰高<br>mAU | 相对峰面积<br>% | 相对峰高<br>% | 样品量<br>n.a. |
| 1    |     | 18.583      | 67.518         | 120.651   | 49.89      | 52.80     | n.a.        |
| 2    |     | 20.653      | 67.829         | 107.843   | 50.11      | 47.20     | n.a.        |

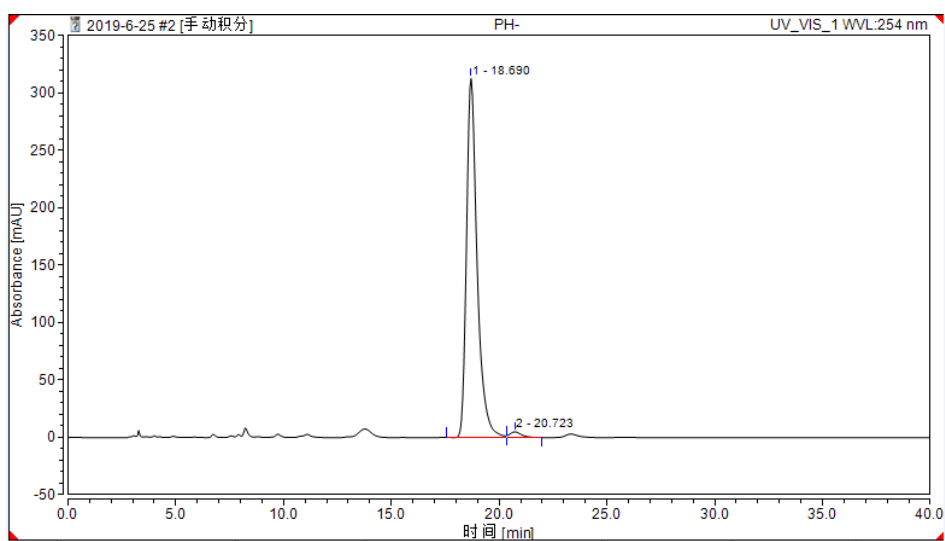

| 积分结果 |     |             |                |           |            |           |             |
|------|-----|-------------|----------------|-----------|------------|-----------|-------------|
| 序号   | 峰名称 | 保留时间<br>min | 峰面积<br>mAU*min | 峰高<br>mAU | 相对峰面积<br>% | 相对峰高<br>% | 样品量<br>n.a. |
| 1    |     | 18.690      | 178.910        | 312.766   | 98.30      | 98.43     | n.a.        |
| 2    |     | 20.723      | 3.088          | 4.986     | 1.70       | 1.57      | n.a.        |

For comparison of Chinese and English of the HPLC data table.

| 序号    | 峰名称       | 保留时间 (min)           | 峰面积 (mAU*min)       | 峰高 (mAU)          | 相对峰面积 (%)              | 相对峰高 (%)                 | 样品量 n.a.           |
|-------|-----------|----------------------|---------------------|-------------------|------------------------|--------------------------|--------------------|
| Entry | Peak name | Retention time (min) | Peak area (mAU*min) | Peak height (mAU) | Relative peak area (%) | Relative Peak height (%) | Sample volume n.a. |

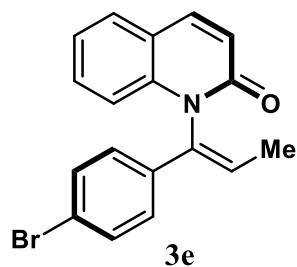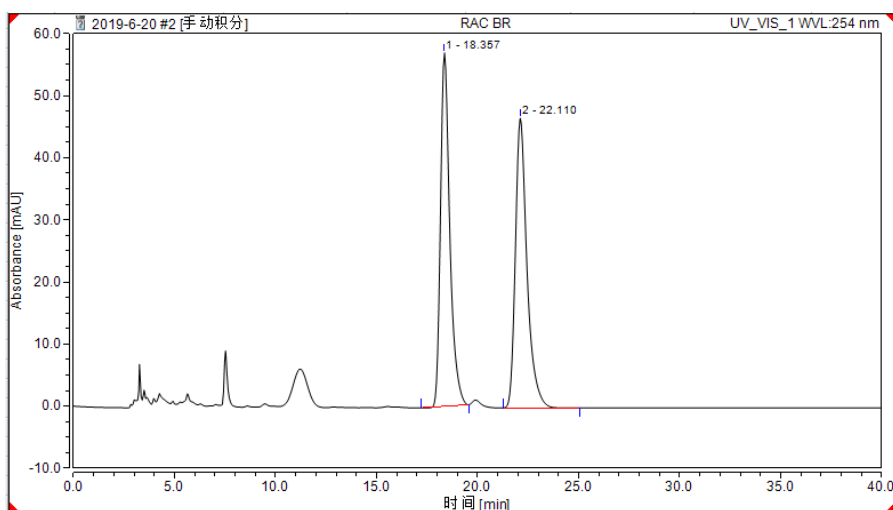

| 积分结果 |     |          |             |        |         |        |          |
|------|-----|----------|-------------|--------|---------|--------|----------|
| 序号   | 峰名称 | 保留时间 min | 峰面积 mAU*min | 峰高 mAU | 相对峰面积 % | 相对峰高 % | 样品量 n.a. |
| 1    |     | 18.357   | 30.299      | 56.963 | 49.47   | 54.98  | n.a.     |
| 2    |     | 22.110   | 30.946      | 46.645 | 50.53   | 45.02  | n.a.     |

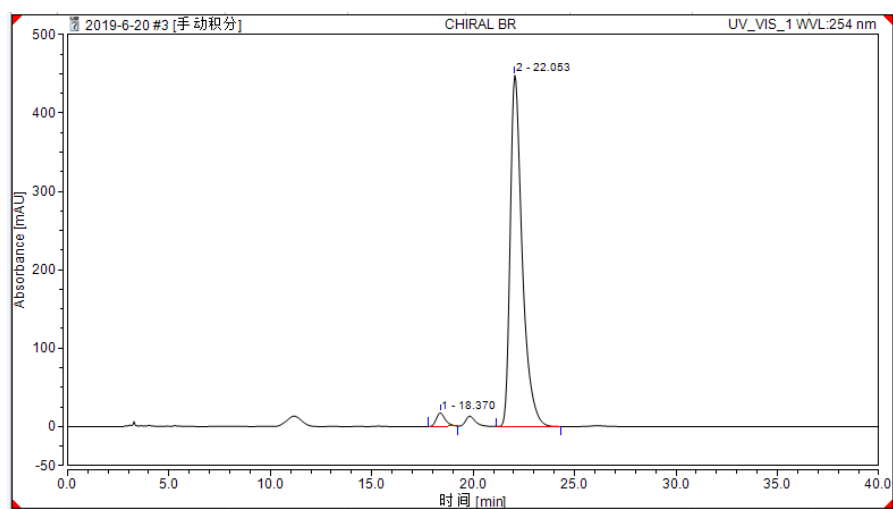

| 积分结果 |     |          |             |         |         |        |          |
|------|-----|----------|-------------|---------|---------|--------|----------|
| 序号   | 峰名称 | 保留时间 min | 峰面积 mAU*min | 峰高 mAU  | 相对峰面积 % | 相对峰高 % | 样品量 n.a. |
| 1    |     | 18.370   | 8.838       | 17.187  | 2.80    | 3.69   | n.a.     |
| 2    |     | 22.053   | 307.134     | 448.139 | 97.20   | 96.31  | n.a.     |

For comparison of Chinese and English of the HPLC data table.

| 序号    | 峰名称       | 保留时间 (min)           | 峰面积 (mAU*min)       | 峰高 (mAU)          | 相对峰面积 (%)              | 相对峰高 (%)                 | 样品量 n.a.           |
|-------|-----------|----------------------|---------------------|-------------------|------------------------|--------------------------|--------------------|
| Entry | Peak name | Retention time (min) | Peak area (mAU*min) | Peak height (mAU) | Relative peak area (%) | Relative Peak height (%) | Sample volume n.a. |

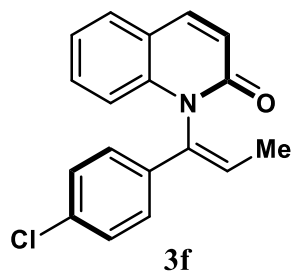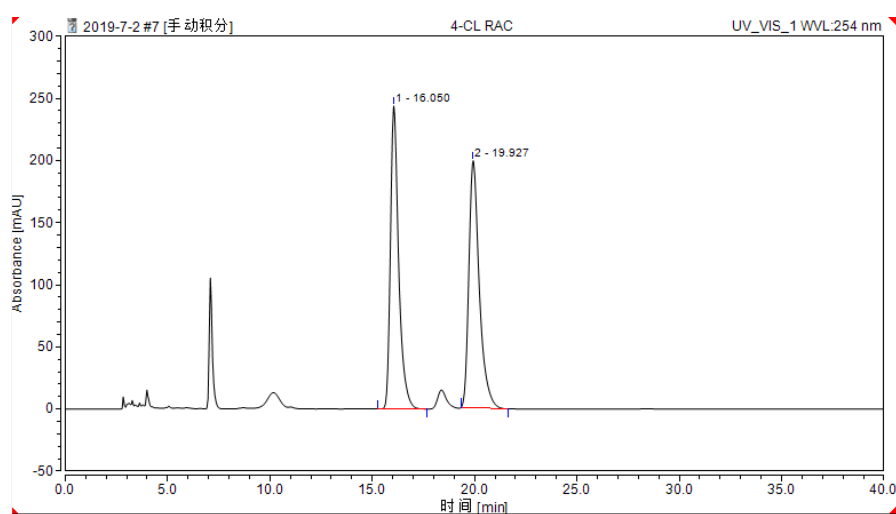

| 积分结果 |     |          |             |         |         |        |          |
|------|-----|----------|-------------|---------|---------|--------|----------|
| 序号   | 峰名称 | 保留时间 min | 峰面积 mAU*min | 峰高 mAU  | 相对峰面积 % | 相对峰高 % | 样品量 n.a. |
| 1    |     | 16.050   | 113.361     | 243.753 | 49.15   | 55.06  | n.a.     |
| 2    |     | 19.927   | 117.290     | 198.933 | 50.85   | 44.94  | n.a.     |

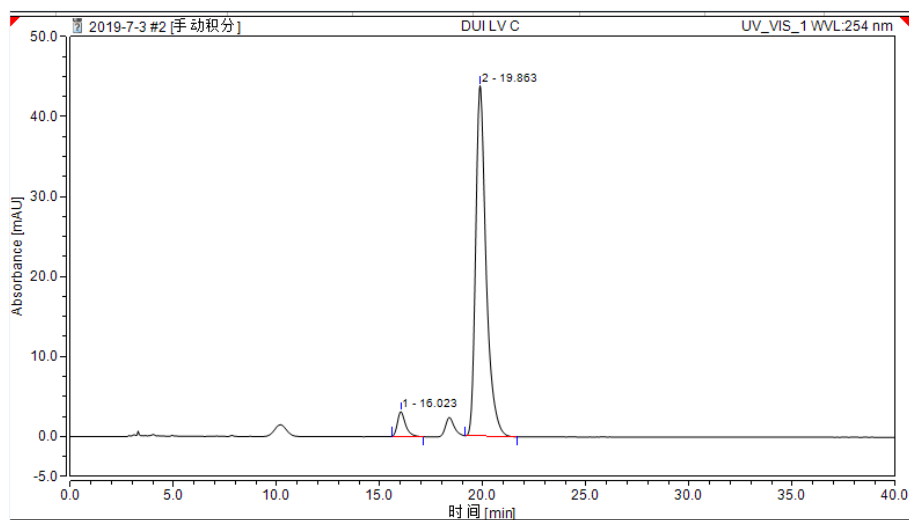

| 积分结果 |     |          |             |        |         |        |          |
|------|-----|----------|-------------|--------|---------|--------|----------|
| 序号   | 峰名称 | 保留时间 min | 峰面积 mAU*min | 峰高 mAU | 相对峰面积 % | 相对峰高 % | 样品量 n.a. |
| 1    |     | 16.023   | 1.412       | 3.108  | 5.22    | 6.63   | n.a.     |
| 2    |     | 19.863   | 25.630      | 43.800 | 94.78   | 93.37  | n.a.     |

For comparison of Chinese and English of the HPLC data table.

| 序号    | 峰名<br>称      | 保留时间<br>(min)           | 峰面积<br>(mAU*min)       | 峰高<br>(mAU)             | 相对峰面<br>积 (%)                | 相对峰高<br>(%)                    | 样品量<br>n.a.              |
|-------|--------------|-------------------------|------------------------|-------------------------|------------------------------|--------------------------------|--------------------------|
| Entry | Peak<br>name | Retention<br>time (min) | Peak area<br>(mAU*min) | Peak<br>height<br>(mAU) | Relative<br>peak area<br>(%) | Relative<br>Peak height<br>(%) | Sample<br>volume<br>n.a. |

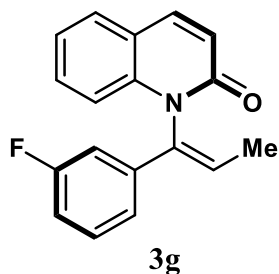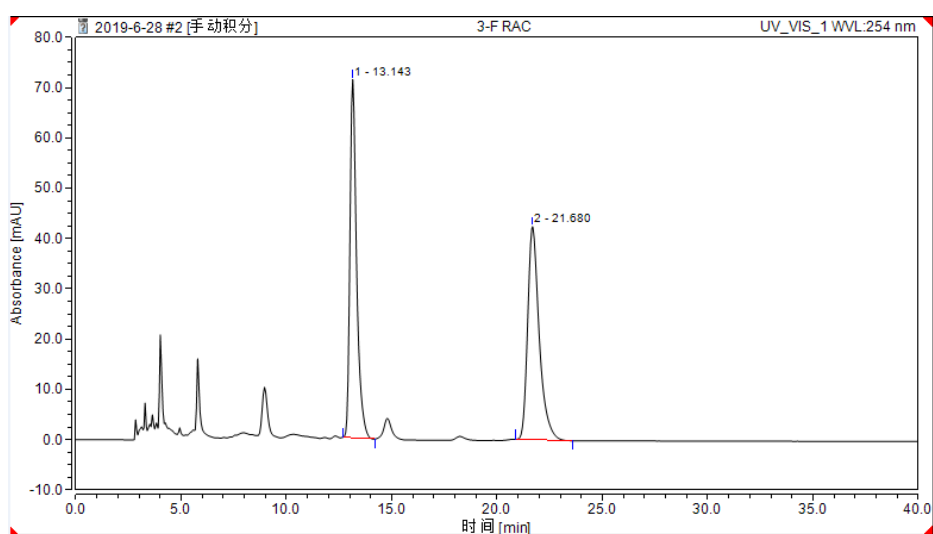

| 积分结果 |     |             |                |           |            |           |             |
|------|-----|-------------|----------------|-----------|------------|-----------|-------------|
| 序号   | 峰名称 | 保留时间<br>min | 峰面积<br>mAU*min | 峰高<br>mAU | 相对峰面积<br>% | 相对峰高<br>% | 样品量<br>n.a. |
| 1    |     | 13.143      | 26.179         | 71.264    | 49.39      | 62.71     | n.a.        |
| 2    |     | 21.680      | 26.831         | 42.378    | 50.61      | 37.29     | n.a.        |

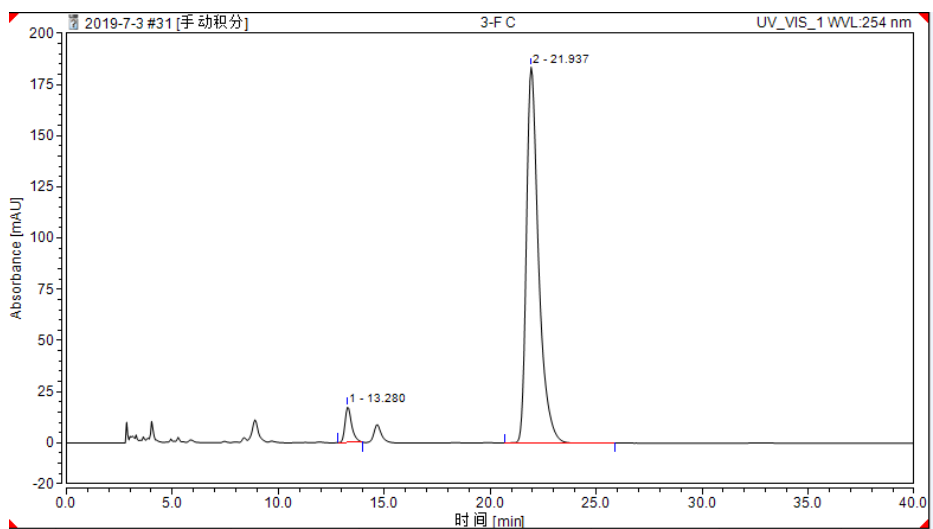

| 积分结果 |     |             |                |           |            |           |             |
|------|-----|-------------|----------------|-----------|------------|-----------|-------------|
| 序号   | 峰名称 | 保留时间<br>min | 峰面积<br>mAU*min | 峰高<br>mAU | 相对峰面积<br>% | 相对峰高<br>% | 样品量<br>n.a. |
| 1    |     | 13.280      | 6.354          | 17.393    | 4.95       | 8.66      | n.a.        |
| 2    |     | 21.937      | 121.896        | 183.550   | 95.05      | 91.34     | n.a.        |

For comparison of Chinese and English of the HPLC data table.

| 序号    | 峰名<br>称      | 保留时间<br>(min)           | 峰面积<br>(mAU*min)       | 峰高<br>(mAU)             | 相对峰面<br>积 (%)                | 相对峰高<br>(%)                    | 样品量<br>n.a.              |
|-------|--------------|-------------------------|------------------------|-------------------------|------------------------------|--------------------------------|--------------------------|
| Entry | Peak<br>name | Retention<br>time (min) | Peak area<br>(mAU*min) | Peak<br>height<br>(mAU) | Relative<br>peak area<br>(%) | Relative<br>Peak height<br>(%) | Sample<br>volume<br>n.a. |

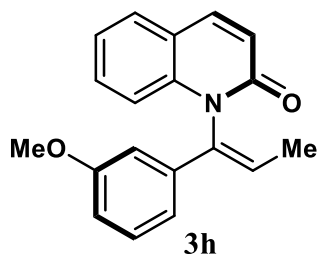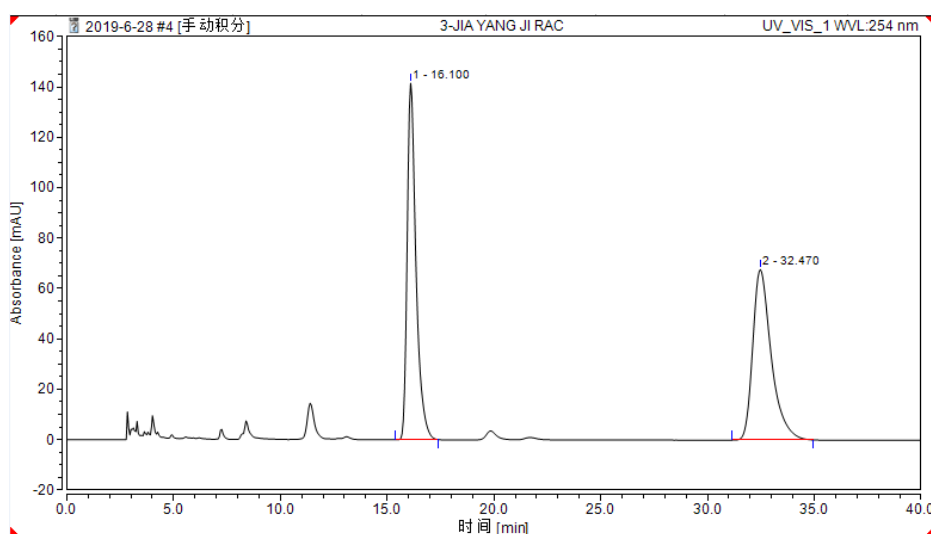

| 积分结果 |     |             |                |           |            |           |             |
|------|-----|-------------|----------------|-----------|------------|-----------|-------------|
| 序号   | 峰名称 | 保留时间<br>min | 峰面积<br>mAU*min | 峰高<br>mAU | 相对峰面积<br>% | 相对峰高<br>% | 样品量<br>n.a. |
| 1    |     | 16.100      | 67.667         | 141.512   | 49.86      | 67.64     | n.a.        |
| 2    |     | 32.470      | 68.044         | 67.708    | 50.14      | 32.36     | n.a.        |

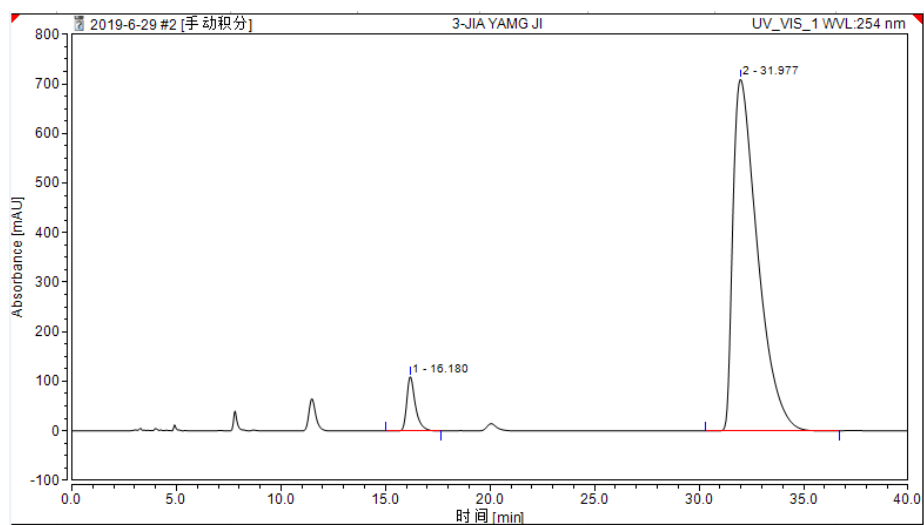

| 积分结果 |     |             |                |           |            |           |             |
|------|-----|-------------|----------------|-----------|------------|-----------|-------------|
| 序号   | 峰名称 | 保留时间<br>min | 峰面积<br>mAU*min | 峰高<br>mAU | 相对峰面积<br>% | 相对峰高<br>% | 样品量<br>n.a. |
| 1    |     | 16.180      | 52.423         | 110.051   | 5.14       | 13.43     | n.a.        |
| 2    |     | 31.977      | 966.547        | 709.645   | 94.86      | 86.57     | n.a.        |

For comparison of Chinese and English of the HPLC data table.

| 序号    | 峰名称       | 保留时间 (min)           | 峰面积 (mAU*min)       | 峰高 (mAU)          | 相对峰面积 (%)              | 相对峰高 (%)                 | 样品量 n.a.           |
|-------|-----------|----------------------|---------------------|-------------------|------------------------|--------------------------|--------------------|
| Entry | Peak name | Retention time (min) | Peak area (mAU*min) | Peak height (mAU) | Relative peak area (%) | Relative Peak height (%) | Sample volume n.a. |

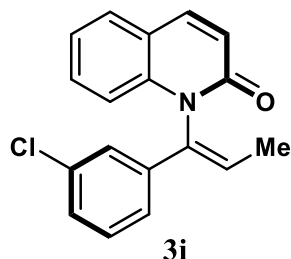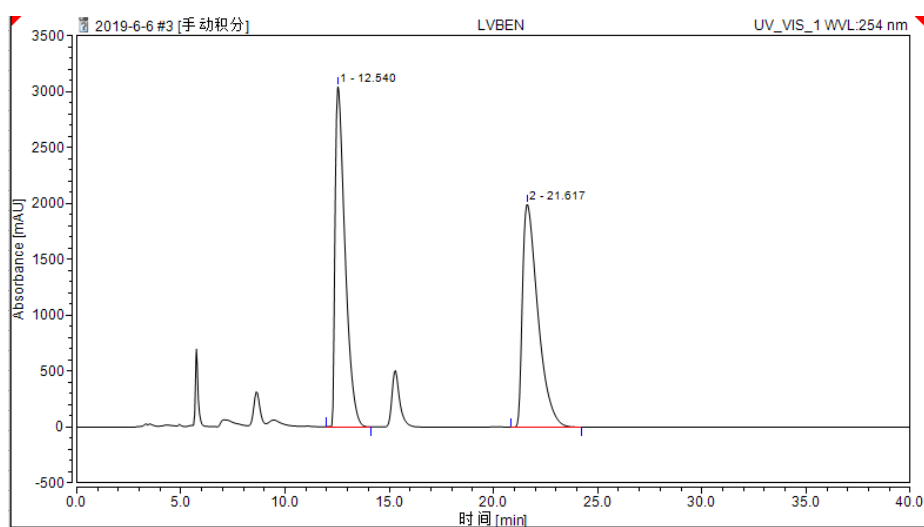

| 积分结果 |     |          |             |          |         |        |          |
|------|-----|----------|-------------|----------|---------|--------|----------|
| 序号   | 峰名称 | 保留时间 min | 峰面积 mAU*min | 峰高 mAU   | 相对峰面积 % | 相对峰高 % | 样品量 n.a. |
| 1    |     | 12.540   | 1685.140    | 3043.222 | 49.65   | 60.40  | n.a.     |
| 2    |     | 21.617   | 1708.968    | 1995.498 | 50.35   | 39.60  | n.a.     |

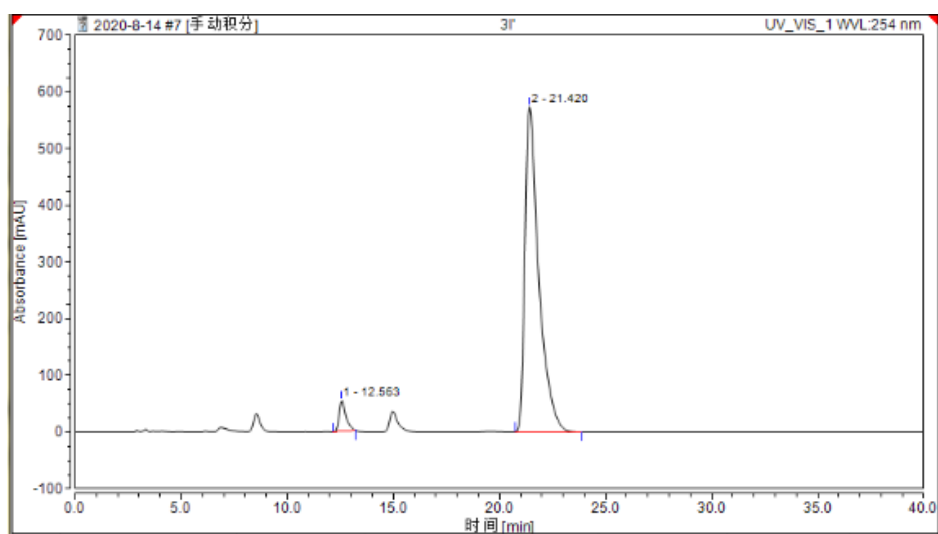

| 积分结果 |     |          |             |         |         |        |          |
|------|-----|----------|-------------|---------|---------|--------|----------|
| 序号   | 峰名称 | 保留时间 min | 峰面积 mAU*min | 峰高 mAU  | 相对峰面积 % | 相对峰高 % | 样品量 n.a. |
| 1    |     | 12.563   | 19.989      | 54.333  | 4.40    | 8.65   | n.a.     |
| 2    |     | 21.420   | 434.003     | 573.768 | 95.60   | 91.35  | n.a.     |



For comparison of Chinese and English of the HPLC data table.

| 序号    | 峰名<br>称      | 保留时间<br>(min)           | 峰面积<br>(mAU*min)       | 峰高<br>(mAU)             | 相对峰面<br>积 (%)                | 相对峰高<br>(%)                    | 样品量<br>n.a.              |
|-------|--------------|-------------------------|------------------------|-------------------------|------------------------------|--------------------------------|--------------------------|
| Entry | Peak<br>name | Retention<br>time (min) | Peak area<br>(mAU*min) | Peak<br>height<br>(mAU) | Relative<br>peak area<br>(%) | Relative<br>Peak height<br>(%) | Sample<br>volume<br>n.a. |

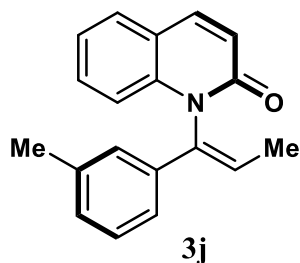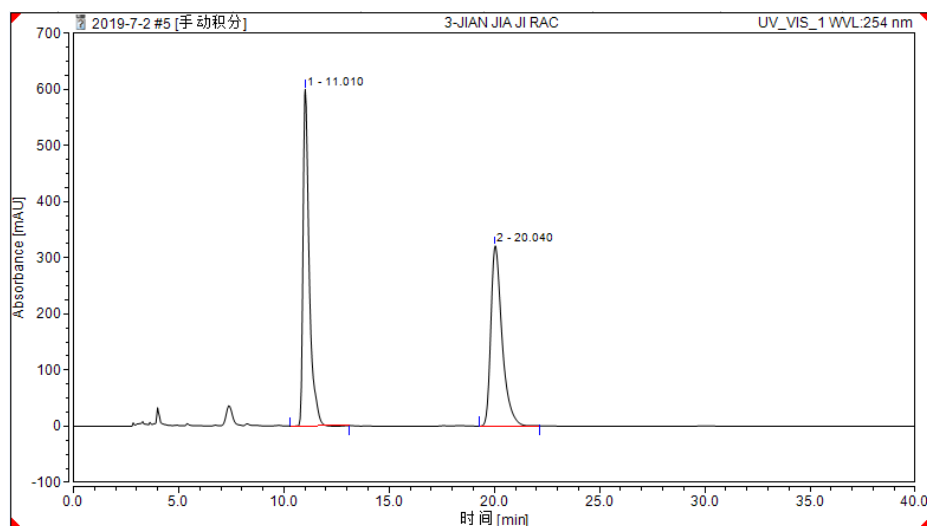

| 积分结果 |     |             |                |           |            |           |             |
|------|-----|-------------|----------------|-----------|------------|-----------|-------------|
| 序号   | 峰名称 | 保留时间<br>min | 峰面积<br>mAU*min | 峰高<br>mAU | 相对峰面积<br>% | 相对峰高<br>% | 样品量<br>n.a. |
| 1    |     | 11.010      | 202.647        | 599.964   | 50.59      | 65.12     | n.a.        |
| 2    |     | 20.040      | 197.960        | 321.291   | 49.41      | 34.88     | n.a.        |

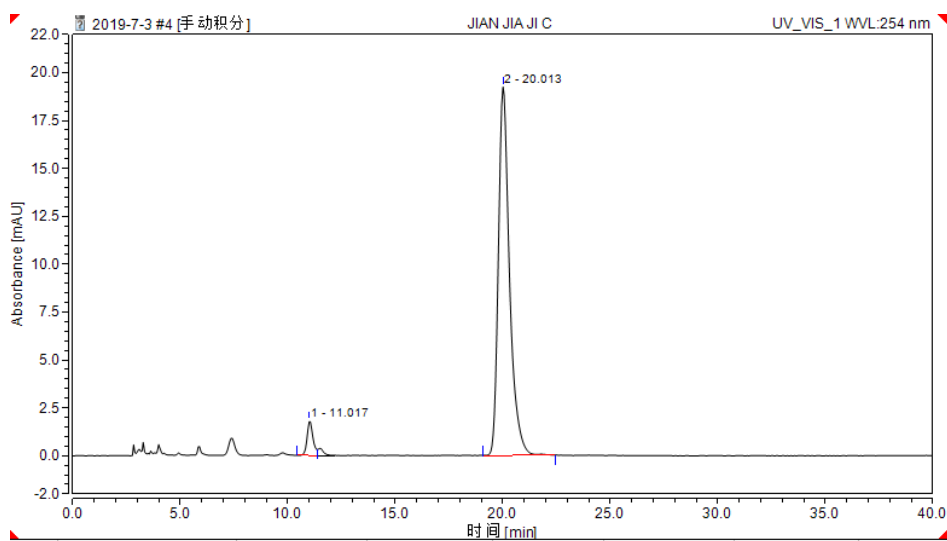

| 积分结果 |     |             |                |           |            |           |             |
|------|-----|-------------|----------------|-----------|------------|-----------|-------------|
| 序号   | 峰名称 | 保留时间<br>min | 峰面积<br>mAU*min | 峰高<br>mAU | 相对峰面积<br>% | 相对峰高<br>% | 样品量<br>n.a. |
| 1    |     | 11.017      | 0.565          | 1.813     | 4.67       | 8.61      | n.a.        |
| 2    |     | 20.013      | 11.547         | 19.249    | 95.33      | 91.39     | n.a.        |

For comparison of Chinese and English of the HPLC data table.

| 序号    | 峰名称       | 保留时间 (min)           | 峰面积 (mAU*min)       | 峰高 (mAU)          | 相对峰面积 (%)              | 相对峰高 (%)                 | 样品量 n.a.           |
|-------|-----------|----------------------|---------------------|-------------------|------------------------|--------------------------|--------------------|
| Entry | Peak name | Retention time (min) | Peak area (mAU*min) | Peak height (mAU) | Relative peak area (%) | Relative Peak height (%) | Sample volume n.a. |

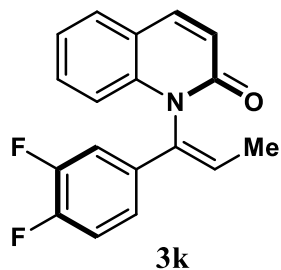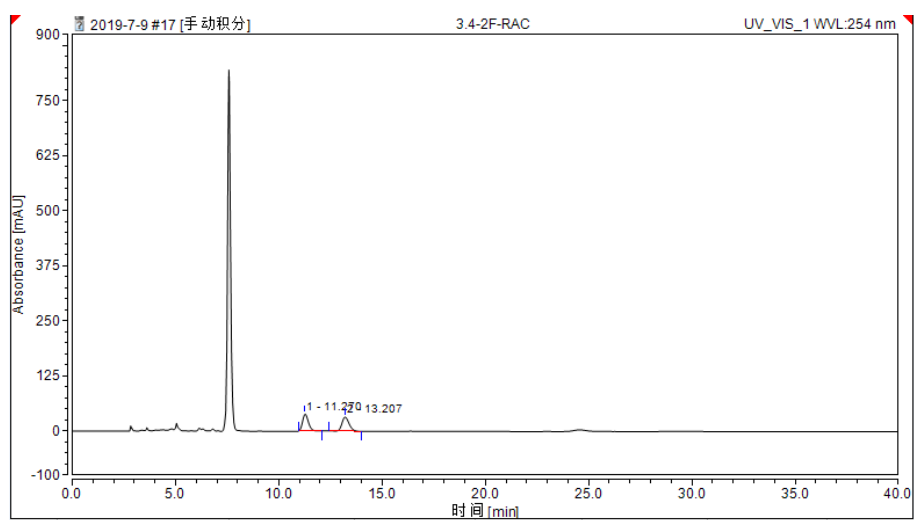

积分结果

| 序号 | 峰名称 | 保留时间 min | 峰面积 mAU*min | 峰高 mAU | 相对峰面积 % | 相对峰高 % | 样品量 n.a. |
|----|-----|----------|-------------|--------|---------|--------|----------|
| 1  |     | 11.270   | 12.507      | 38.747 | 49.94   | 54.76  | n.a.     |
| 2  |     | 13.207   | 12.535      | 32.011 | 50.06   | 45.24  | n.a.     |

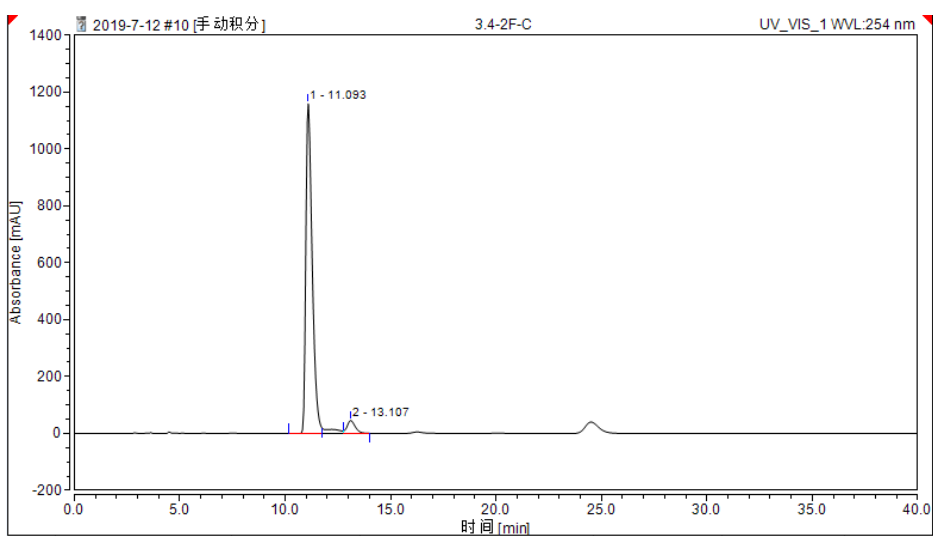

积分结果

| 序号 | 峰名称 | 保留时间 min | 峰面积 mAU*min | 峰高 mAU   | 相对峰面积 % | 相对峰高 % | 样品量 n.a. |
|----|-----|----------|-------------|----------|---------|--------|----------|
| 1  |     | 11.093   | 403.015     | 1159.067 | 95.18   | 96.24  | n.a.     |
| 2  |     | 13.107   | 20.390      | 45.330   | 4.82    | 3.76   | n.a.     |

For comparison of Chinese and English of the HPLC data table.

| 序号    | 峰名称       | 保留时间 (min)           | 峰面积 (mAU*min)       | 峰高 (mAU)          | 相对峰面积 (%)              | 相对峰高 (%)                 | 样品量 n.a.           |
|-------|-----------|----------------------|---------------------|-------------------|------------------------|--------------------------|--------------------|
| Entry | Peak name | Retention time (min) | Peak area (mAU*min) | Peak height (mAU) | Relative peak area (%) | Relative Peak height (%) | Sample volume n.a. |

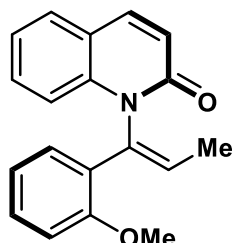

31

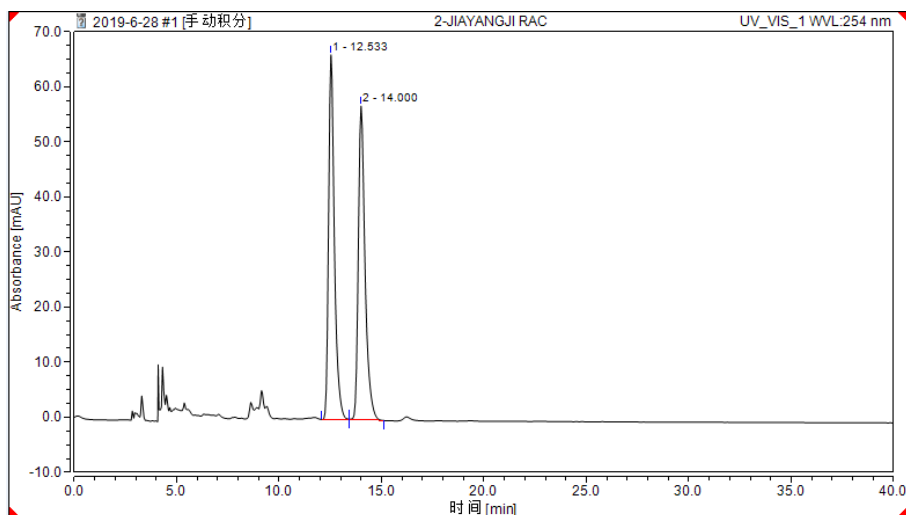

积分结果

| 序号 | 峰名称 | 保留时间 min | 峰面积 mAU*min | 峰高 mAU | 相对峰面积 % | 相对峰高 % | 样品量 n.a. |
|----|-----|----------|-------------|--------|---------|--------|----------|
| 1  |     | 12.533   | 21.562      | 66.223 | 49.91   | 53.76  | n.a.     |
| 2  |     | 14.000   | 21.636      | 56.955 | 50.09   | 46.24  | n.a.     |

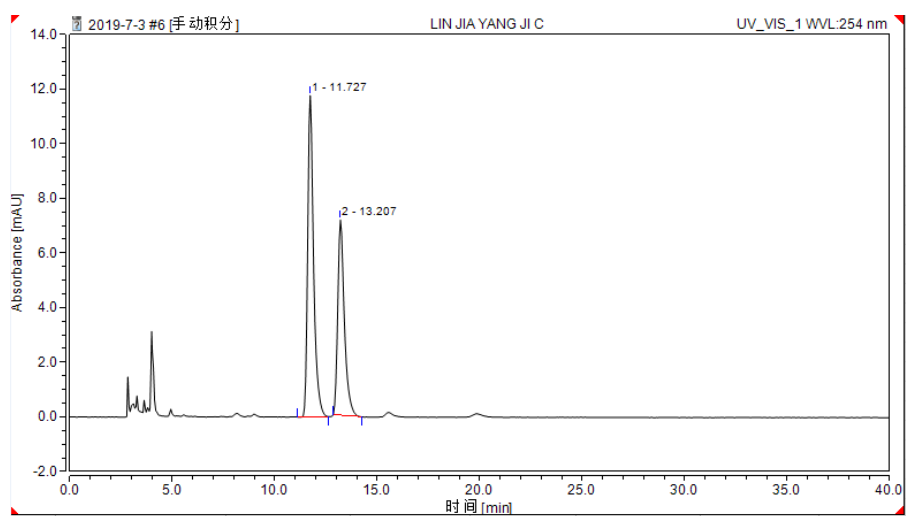

积分结果

| 序号 | 峰名称 | 保留时间 min | 峰面积 mAU*min | 峰高 mAU | 相对峰面积 % | 相对峰高 % | 样品量 n.a. |
|----|-----|----------|-------------|--------|---------|--------|----------|
| 1  |     | 11.727   | 3.880       | 11.763 | 59.17   | 62.16  | n.a.     |
| 2  |     | 13.207   | 2.677       | 7.160  | 40.83   | 37.84  | n.a.     |

For comparison of Chinese and English of the HPLC data table.

| 序号    | 峰名<br>称      | 保留时间<br>(min)           | 峰面<br>积<br>(mAU*min)   | 峰高<br>(mAU)             | 相对峰面<br>积 (%)                | 相对峰高<br>(%)                    | 样品量<br>n.a.              |
|-------|--------------|-------------------------|------------------------|-------------------------|------------------------------|--------------------------------|--------------------------|
| Entry | Peak<br>name | Retention<br>time (min) | Peak area<br>(mAU*min) | Peak<br>height<br>(mAU) | Relative<br>peak area<br>(%) | Relative<br>Peak height<br>(%) | Sample<br>volume<br>n.a. |

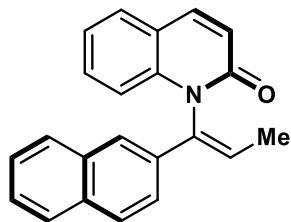

3m

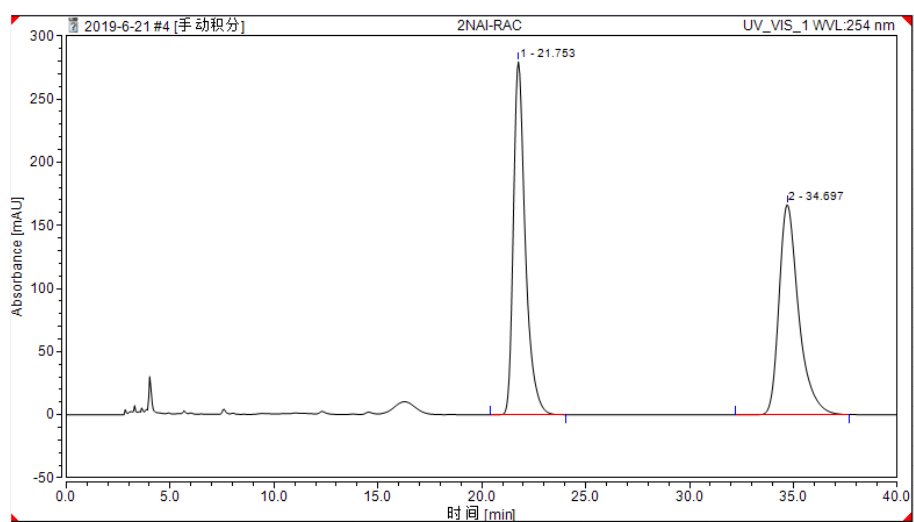

积分结果

| 序号 | 峰名称 | 保留时间<br>min | 峰面积<br>mAU*min | 峰高<br>mAU | 相对峰面积<br>% | 相对峰高<br>% | 样品量<br>n.a. |
|----|-----|-------------|----------------|-----------|------------|-----------|-------------|
| 1  |     | 21.753      | 186.072        | 279.636   | 50.63      | 62.71     | n.a.        |
| 2  |     | 34.697      | 181.471        | 166.316   | 49.37      | 37.29     | n.a.        |

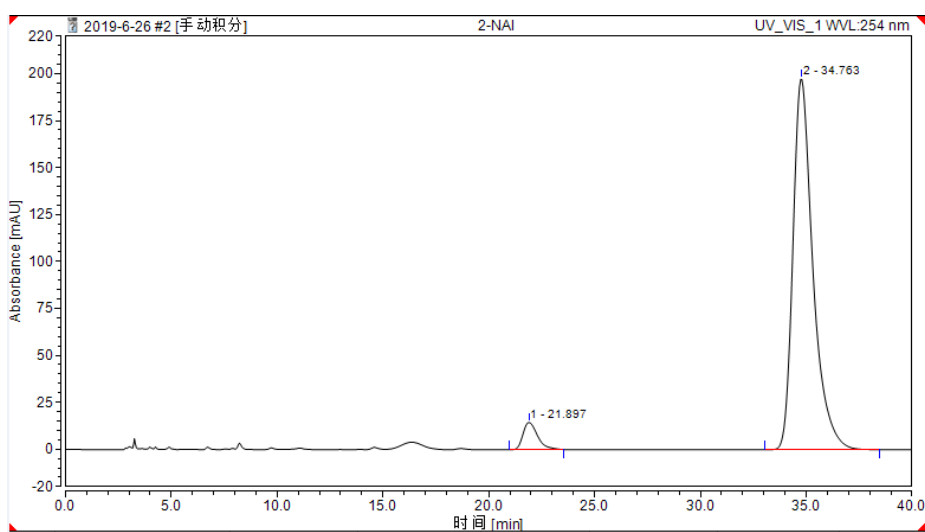

积分结果

| 序号 | 峰名称 | 保留时间<br>min | 峰面积<br>mAU*min | 峰高<br>mAU | 相对峰面积<br>% | 相对峰高<br>% | 样品量<br>n.a. |
|----|-----|-------------|----------------|-----------|------------|-----------|-------------|
| 1  |     | 21.897      | 11.553         | 14.509    | 5.08       | 6.84      | n.a.        |
| 2  |     | 34.763      | 215.914        | 197.757   | 94.92      | 93.16     | n.a.        |

For comparison of Chinese and English of the HPLC data table.

| 序号    | 峰名<br>称      | 保留时间<br>(min)           | 峰面积<br>(mAU*min)       | 峰高<br>(mAU)             | 相对峰面<br>积 (%)                | 相对峰高<br>(%)                    | 样品量<br>n.a.              |
|-------|--------------|-------------------------|------------------------|-------------------------|------------------------------|--------------------------------|--------------------------|
| Entry | Peak<br>name | Retention<br>time (min) | Peak area<br>(mAU*min) | Peak<br>height<br>(mAU) | Relative<br>peak area<br>(%) | Relative<br>Peak height<br>(%) | Sample<br>volume<br>n.a. |

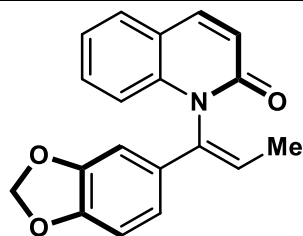

3n

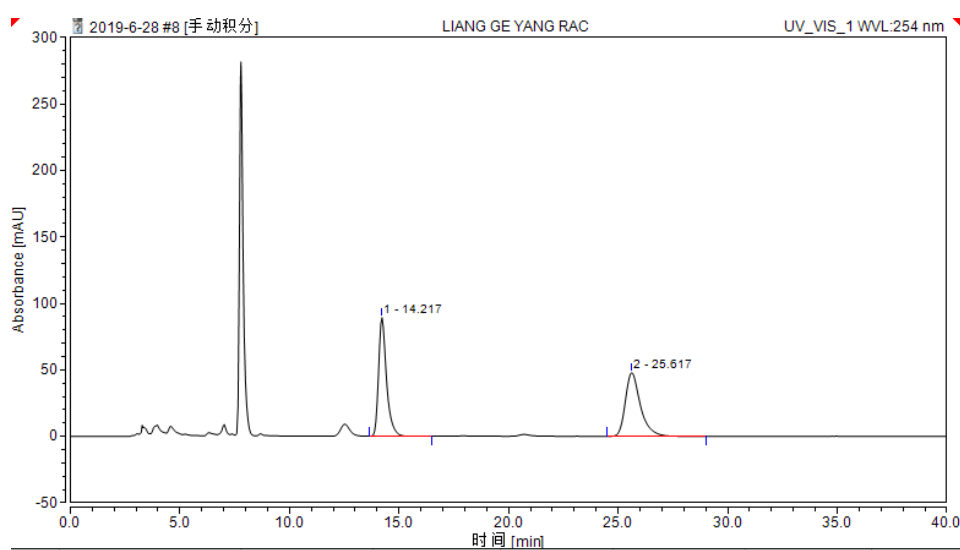

| 积分结果 |     |             |                |           |            |           |             |
|------|-----|-------------|----------------|-----------|------------|-----------|-------------|
| 序号   | 峰名称 | 保留时间<br>min | 峰面积<br>mAU*min | 峰高<br>mAU | 相对峰面积<br>% | 相对峰高<br>% | 样品量<br>n.a. |
| 1    |     | 14.217      | 37.384         | 89.348    | 49.54      | 65.10     | n.a.        |
| 2    |     | 25.617      | 38.073         | 47.895    | 50.46      | 34.90     | n.a.        |

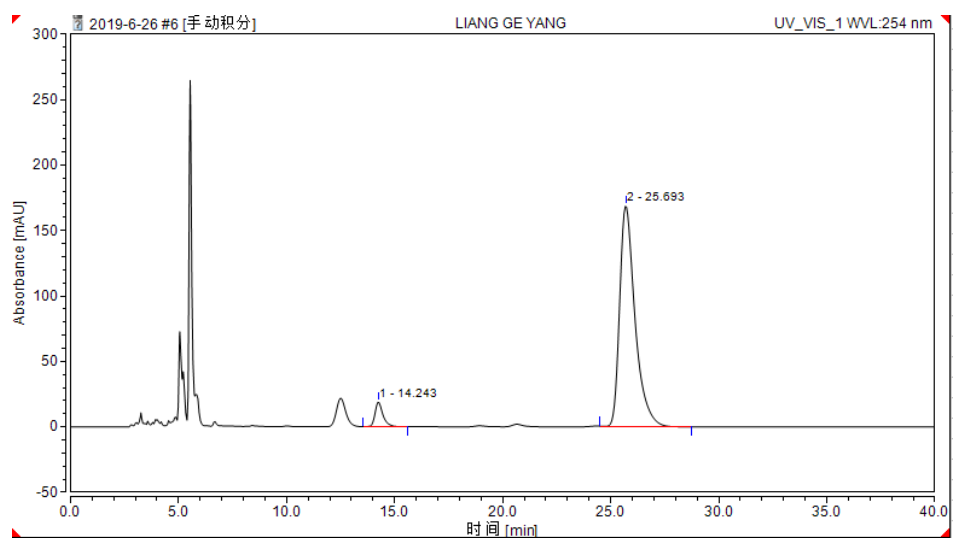

| 积分结果 |     |             |                |           |            |           |             |
|------|-----|-------------|----------------|-----------|------------|-----------|-------------|
| 序号   | 峰名称 | 保留时间<br>min | 峰面积<br>mAU*min | 峰高<br>mAU | 相对峰面积<br>% | 相对峰高<br>% | 样品量<br>n.a. |
| 1    |     | 14.243      | 8.006          | 18.852    | 5.47       | 10.06     | n.a.        |
| 2    |     | 25.693      | 138.386        | 168.596   | 94.53      | 89.94     | n.a.        |

For comparison of Chinese and English of the HPLC data table.

| 序号    | 峰名<br>称      | 保留时间<br>(min)           | 峰面积<br>(mAU*min)       | 峰高<br>(mAU)             | 相对峰面<br>积 (%)                | 相对峰高<br>(%)                    | 样品量<br>n.a.              |
|-------|--------------|-------------------------|------------------------|-------------------------|------------------------------|--------------------------------|--------------------------|
| Entry | Peak<br>name | Retention<br>time (min) | Peak area<br>(mAU*min) | Peak<br>height<br>(mAU) | Relative<br>peak area<br>(%) | Relative<br>Peak height<br>(%) | Sample<br>volume<br>n.a. |

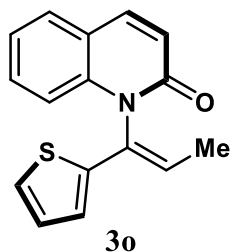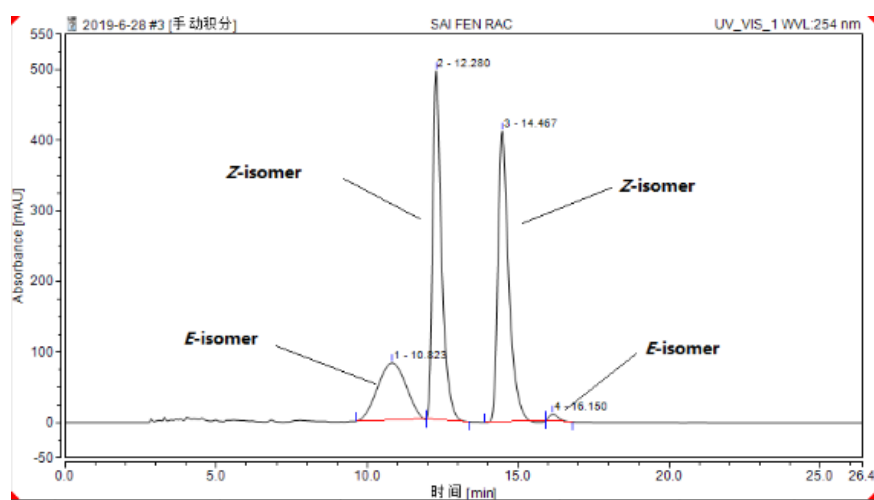

| 积分结果 |     |             |                |           |            |           |             |
|------|-----|-------------|----------------|-----------|------------|-----------|-------------|
| 序号   | 峰名称 | 保留时间<br>min | 峰面积<br>mAU*min | 峰高<br>mAU | 相对峰面积<br>% | 相对峰高<br>% | 样品量<br>n.a. |
| 1    |     | 10.823      | 87.884         | 80.601    | 20.44      | 8.10      | n.a.        |
| 2    |     | 12.280      | 169.397        | 493.510   | 39.39      | 49.58     | n.a.        |
| 3    |     | 14.467      | 169.555        | 411.870   | 39.43      | 41.38     | n.a.        |
| 4    |     | 16.150      | 3.172          | 9.381     | 0.74       | 0.94      | n.a.        |

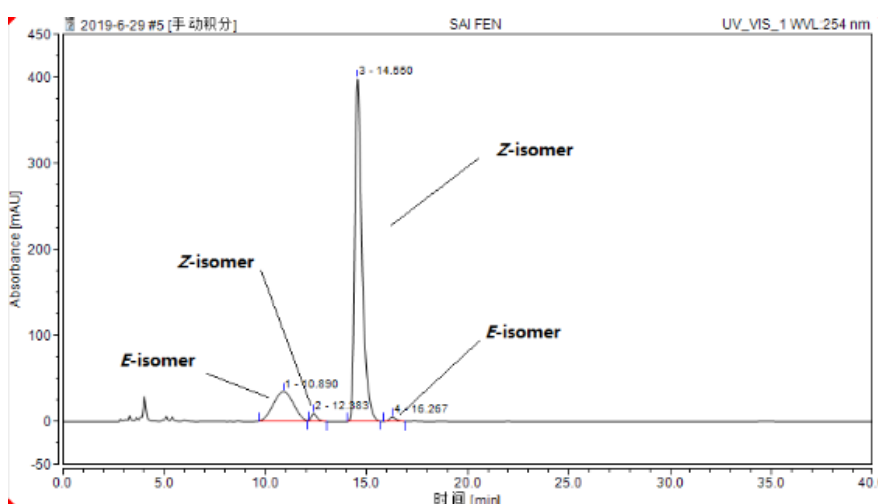

| 积分结果 |     |             |                |           |            |           |             |
|------|-----|-------------|----------------|-----------|------------|-----------|-------------|
| 序号   | 峰名称 | 保留时间<br>min | 峰面积<br>mAU*min | 峰高<br>mAU | 相对峰面积<br>% | 相对峰高<br>% | 样品量<br>n.a. |
| 1    |     | 10.890      | 39.126         | 34.177    | 18.54      | 7.66      | n.a.        |
| 2    |     | 12.383      | 2.745          | 8.844     | 1.30       | 1.98      | n.a.        |
| 3    |     | 14.550      | 167.268        | 398.247   | 79.26      | 89.29     | n.a.        |
| 4    |     | 16.267      | 1.903          | 4.756     | 0.90       | 1.07      | n.a.        |

For comparison of Chinese and English of the HPLC data table.

| 序号    | 峰名称       | 保留时间 (min)           | 峰面积 (mAU*min)       | 峰高 (mAU)          | 相对峰面积 (%)              | 相对峰高 (%)                 | 样品量 n.a.           |
|-------|-----------|----------------------|---------------------|-------------------|------------------------|--------------------------|--------------------|
| Entry | Peak name | Retention time (min) | Peak area (mAU*min) | Peak height (mAU) | Relative peak area (%) | Relative Peak height (%) | Sample volume n.a. |

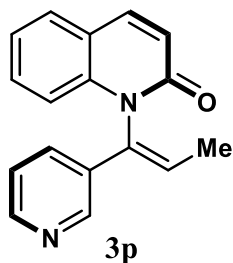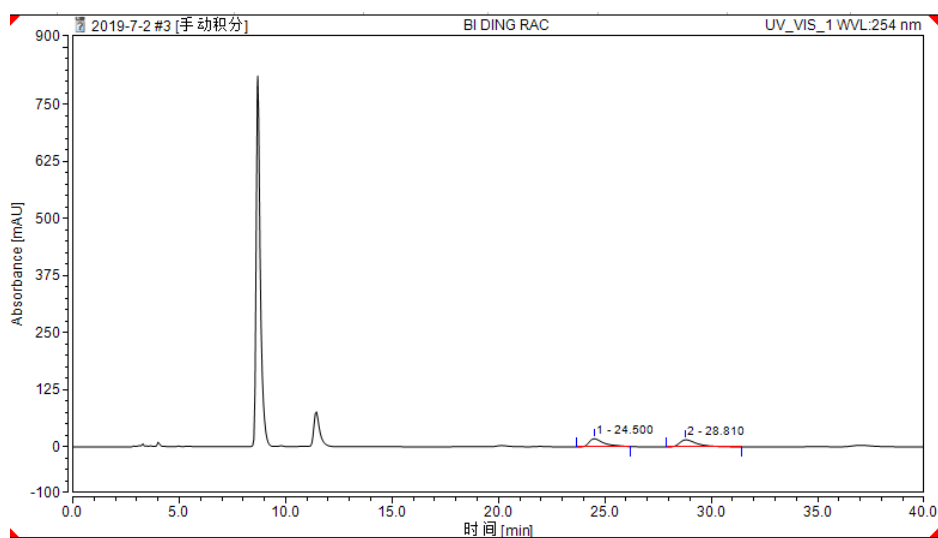

| 序号 | 峰名称 | 保留时间 min | 峰面积 mAU*min | 峰高 mAU | 相对峰面积 % | 相对峰高 % | 样品量 n.a. |
|----|-----|----------|-------------|--------|---------|--------|----------|
| 1  |     | 24.500   | 14.436      | 17.646 | 49.42   | 53.19  | n.a.     |
| 2  |     | 28.810   | 14.776      | 15.530 | 50.58   | 46.81  | n.a.     |

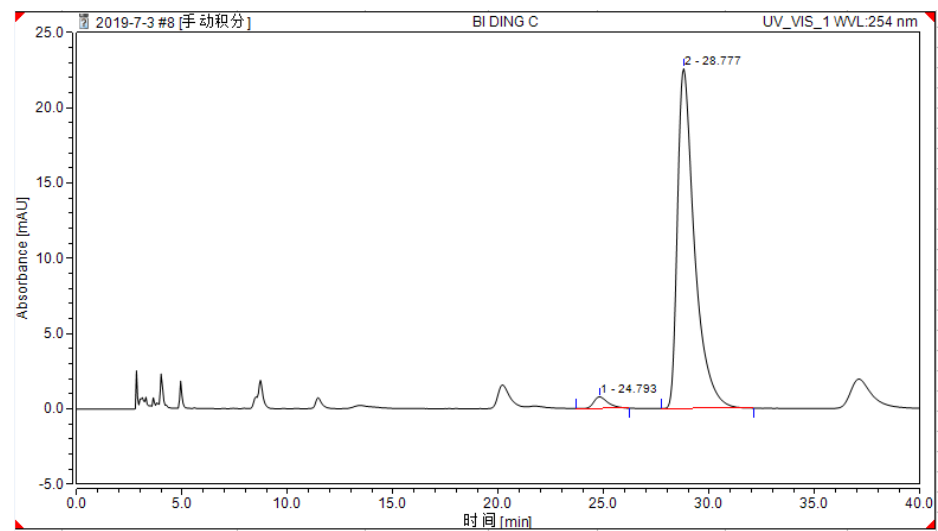

| 序号 | 峰名称 | 保留时间 min | 峰面积 mAU*min | 峰高 mAU | 相对峰面积 % | 相对峰高 % | 样品量 n.a. |
|----|-----|----------|-------------|--------|---------|--------|----------|
| 1  |     | 24.793   | 0.606       | 0.771  | 2.79    | 3.30   | n.a.     |
| 2  |     | 28.777   | 21.151      | 22.566 | 97.21   | 96.70  | n.a.     |

For comparison of Chinese and English of the HPLC data table.

| 序号    | 峰名称       | 保留时间 (min)           | 峰面积 (mAU*min)       | 峰高 (mAU)          | 相对峰面积 (%)              | 相对峰高 (%)                 | 样品量 n.a.           |
|-------|-----------|----------------------|---------------------|-------------------|------------------------|--------------------------|--------------------|
| Entry | Peak name | Retention time (min) | Peak area (mAU*min) | Peak height (mAU) | Relative peak area (%) | Relative Peak height (%) | Sample volume n.a. |

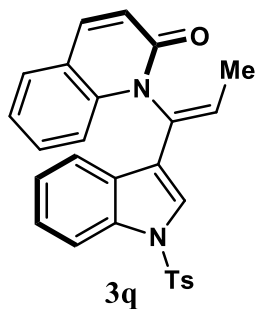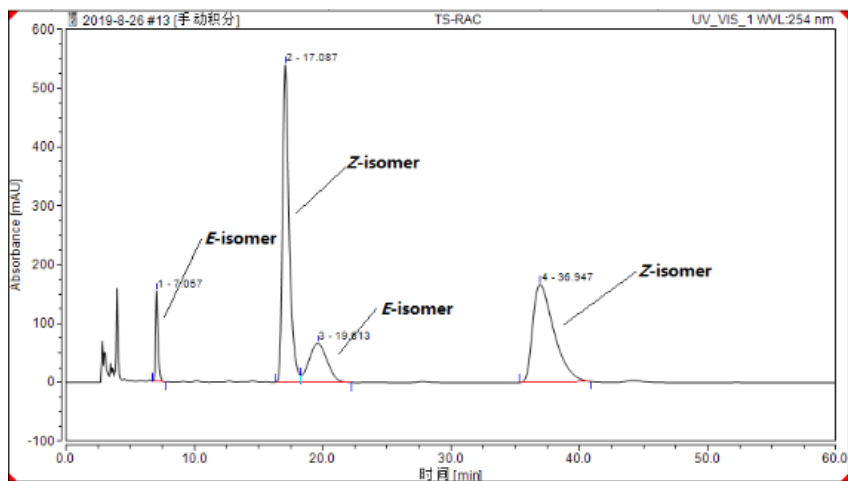

| 积分结果 |     |          |             |         |         |        |          |
|------|-----|----------|-------------|---------|---------|--------|----------|
| 序号   | 峰名称 | 保留时间 min | 峰面积 mAU*min | 峰高 mAU  | 相对峰面积 % | 相对峰高 % | 样品量 n.a. |
| 1    |     | 7.057    | 30.289      | 153.497 | 3.87    | 16.58  | n.a.     |
| 2    |     | 17.087   | 323.882     | 539.454 | 41.42   | 58.27  | n.a.     |
| 3    |     | 19.613   | 108.117     | 66.627  | 13.83   | 7.20   | n.a.     |
| 4    |     | 36.947   | 319.574     | 166.222 | 40.87   | 17.95  | n.a.     |

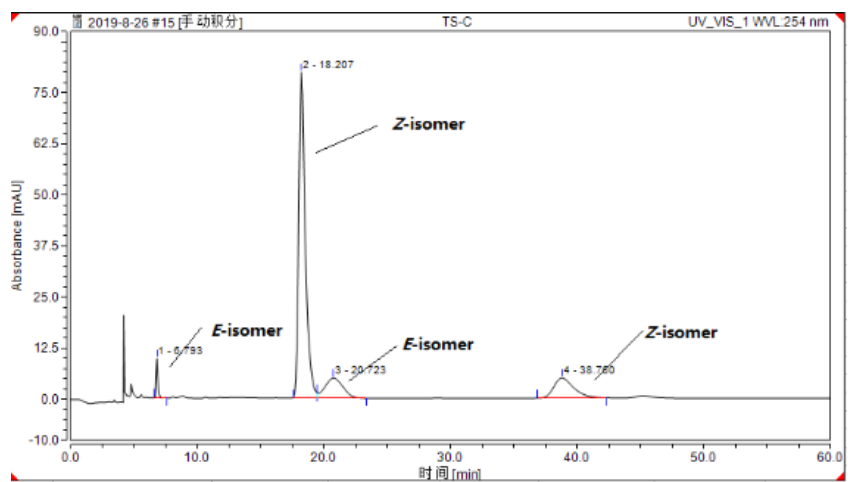

| 积分结果 |     |          |             |        |         |        |          |
|------|-----|----------|-------------|--------|---------|--------|----------|
| 序号   | 峰名称 | 保留时间 min | 峰面积 mAU*min | 峰高 mAU | 相对峰面积 % | 相对峰高 % | 样品量 n.a. |
| 1    |     | 6.793    | 1.311       | 9.547  | 1.98    | 9.64   | n.a.     |
| 2    |     | 18.207   | 47.982      | 79.672 | 72.38   | 80.47  | n.a.     |
| 3    |     | 20.723   | 8.018       | 4.870  | 12.09   | 4.92   | n.a.     |
| 4    |     | 38.760   | 8.984       | 4.918  | 13.55   | 4.97   | n.a.     |



For comparison of Chinese and English of the HPLC data table.

| 序号    | 峰名<br>称      | 保留时间<br>(min)           | 峰面积<br>(mAU*min)       | 峰高<br>(mAU)             | 相对峰面<br>积 (%)                | 相对峰高<br>(%)                    | 样品量<br>n.a.              |
|-------|--------------|-------------------------|------------------------|-------------------------|------------------------------|--------------------------------|--------------------------|
| Entry | Peak<br>name | Retention<br>time (min) | Peak area<br>(mAU*min) | Peak<br>height<br>(mAU) | Relative<br>peak area<br>(%) | Relative<br>Peak height<br>(%) | Sample<br>volume<br>n.a. |

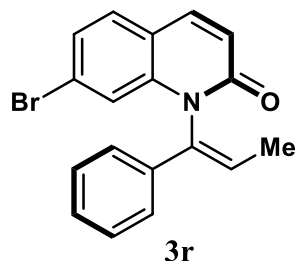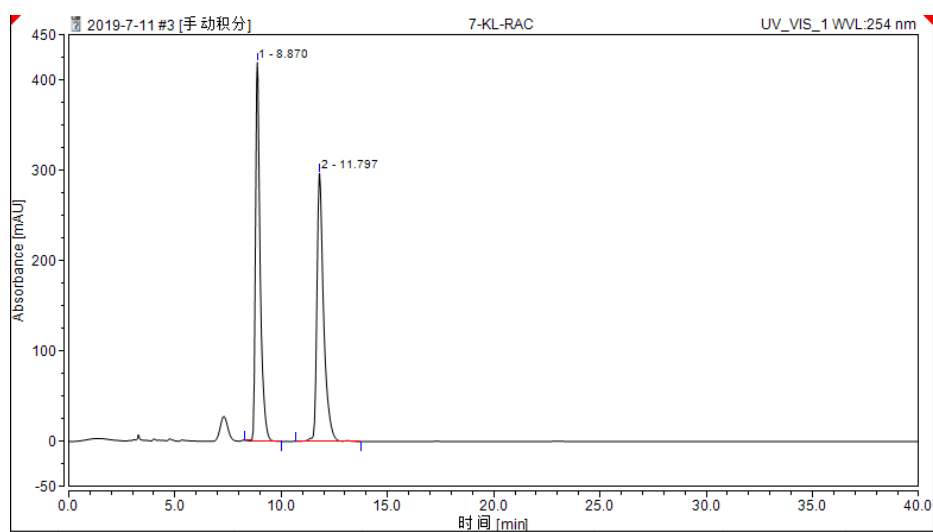

积分结果

| 序号 | 峰名称 | 保留时间<br>min | 峰面积<br>mAU*min | 峰高<br>mAU | 相对峰面积<br>% | 相对峰高<br>% | 样品量<br>n.a. |
|----|-----|-------------|----------------|-----------|------------|-----------|-------------|
| 1  |     | 8.870       | 106.274        | 418.849   | 49.45      | 58.51     | n.a.        |
| 2  |     | 11.797      | 108.631        | 296.987   | 50.55      | 41.49     | n.a.        |

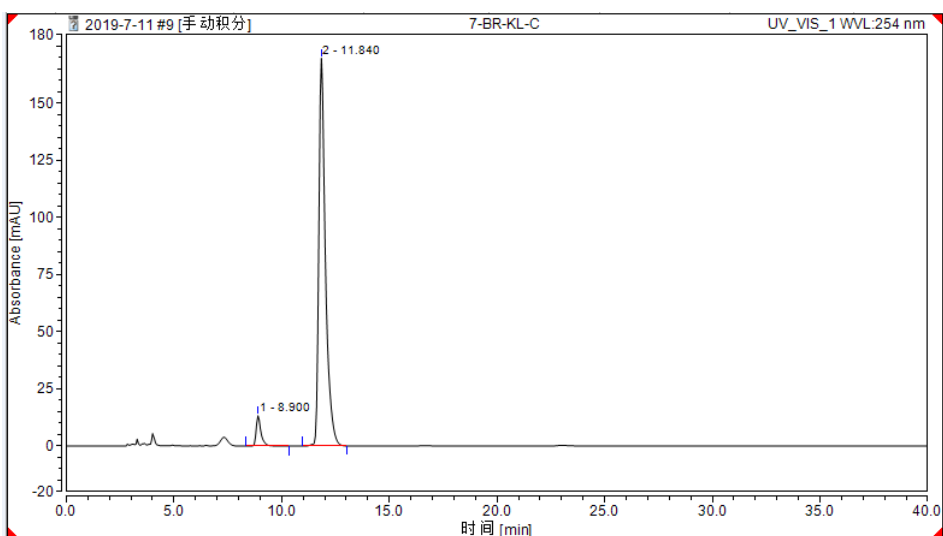

积分结果

| 序号 | 峰名称 | 保留时间<br>min | 峰面积<br>mAU*min | 峰高<br>mAU | 相对峰面积<br>% | 相对峰高<br>% | 样品量<br>n.a. |
|----|-----|-------------|----------------|-----------|------------|-----------|-------------|
| 1  |     | 8.900       | 3.392          | 13.334    | 5.31       | 7.28      | n.a.        |
| 2  |     | 11.840      | 60.479         | 169.707   | 94.69      | 92.72     | n.a.        |

For comparison of Chinese and English of the HPLC data table.

| 序号    | 峰名<br>称      | 保留时间<br>(min)           | 峰面积<br>(mAU*min)       | 峰高<br>(mAU)             | 相对峰面<br>积 (%)                | 相对峰高<br>(%)                    | 样品量<br>n.a.              |
|-------|--------------|-------------------------|------------------------|-------------------------|------------------------------|--------------------------------|--------------------------|
| Entry | Peak<br>name | Retention<br>time (min) | Peak area<br>(mAU*min) | Peak<br>height<br>(mAU) | Relative<br>peak area<br>(%) | Relative<br>Peak height<br>(%) | Sample<br>volume<br>n.a. |

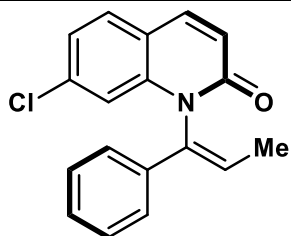

3s

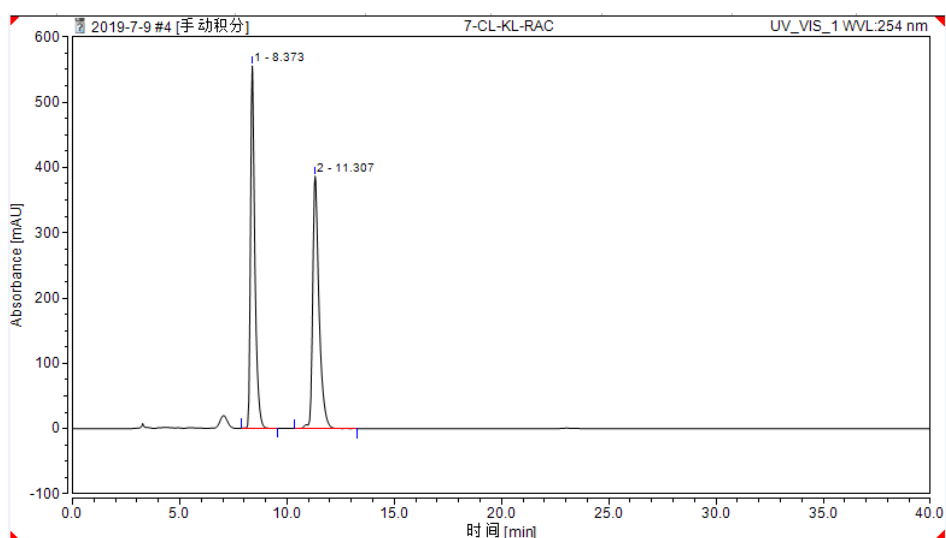

| 积分结果 |     |             |                |           |            |           |             |
|------|-----|-------------|----------------|-----------|------------|-----------|-------------|
| 序号   | 峰名称 | 保留时间<br>min | 峰面积<br>mAU*min | 峰高<br>mAU | 相对峰面积<br>% | 相对峰高<br>% | 样品量<br>n.a. |
| 1    |     | 8.373       | 129.534        | 554.861   | 49.53      | 58.93     | n.a.        |
| 2    |     | 11.307      | 131.967        | 386.730   | 50.47      | 41.07     | n.a.        |

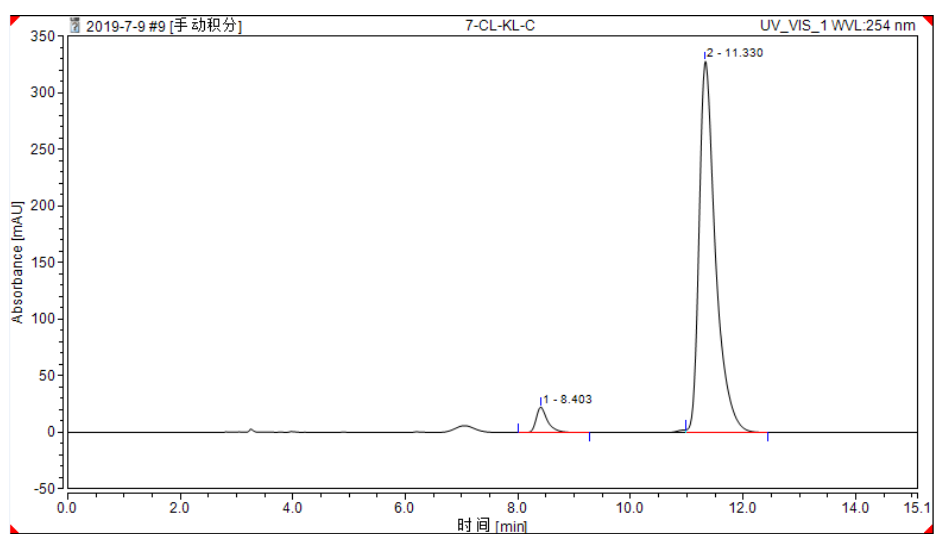

| 积分结果 |     |             |                |           |            |           |             |
|------|-----|-------------|----------------|-----------|------------|-----------|-------------|
| 序号   | 峰名称 | 保留时间<br>min | 峰面积<br>mAU*min | 峰高<br>mAU | 相对峰面积<br>% | 相对峰高<br>% | 样品量<br>n.a. |
| 1    |     | 8.403       | 5.162          | 22.472    | 4.47       | 6.41      | n.a.        |
| 2    |     | 11.330      | 110.288        | 328.047   | 95.53      | 93.59     | n.a.        |

For comparison of Chinese and English of the HPLC data table.

| 序号    | 峰名称       | 保留时间 (min)           | 峰面积 (mAU*min)       | 峰高 (mAU)          | 相对峰面积 (%)              | 相对峰高 (%)                 | 样品量 n.a.           |
|-------|-----------|----------------------|---------------------|-------------------|------------------------|--------------------------|--------------------|
| Entry | Peak name | Retention time (min) | Peak area (mAU*min) | Peak height (mAU) | Relative peak area (%) | Relative Peak height (%) | Sample volume n.a. |

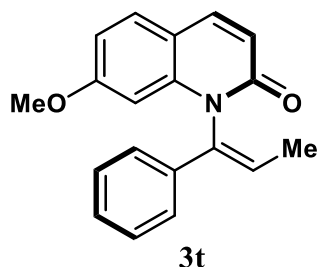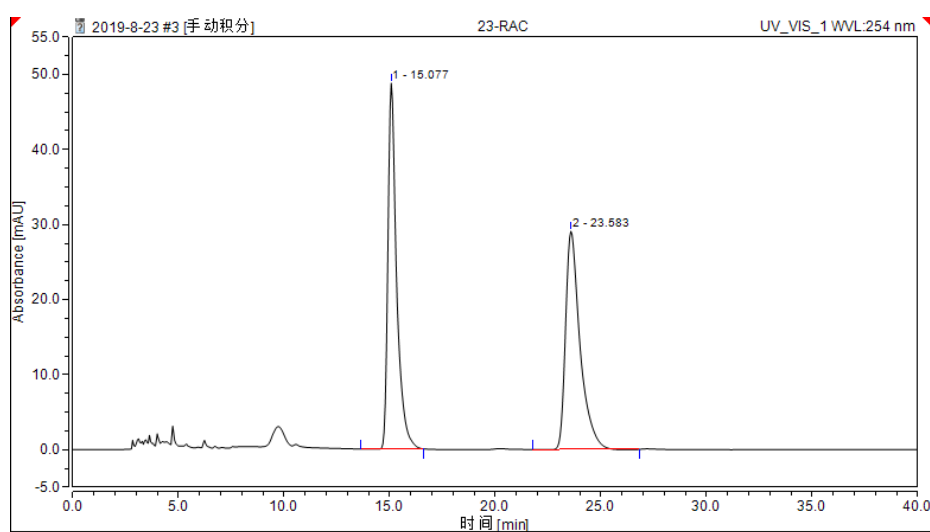

**积分结果**

| 序号 | 峰名称 | 保留时间 min | 峰面积 mAU*min | 峰高 mAU | 相对峰面积 % | 相对峰高 % | 样品量 n.a. |
|----|-----|----------|-------------|--------|---------|--------|----------|
| 1  |     | 15.077   | 23.195      | 48.760 | 50.21   | 62.62  | n.a.     |
| 2  |     | 23.583   | 22.997      | 29.106 | 49.79   | 37.38  | n.a.     |

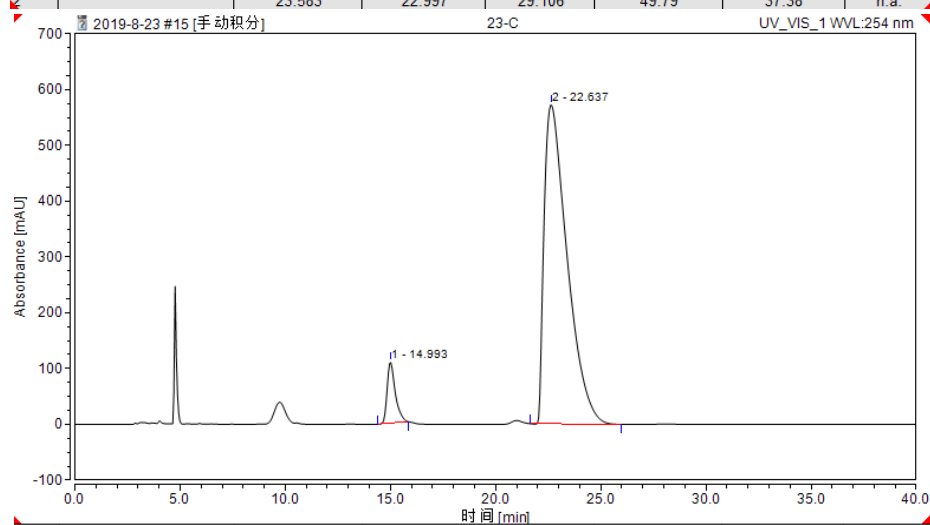

**积分结果**

| 序号 | 峰名称 | 保留时间 min | 峰面积 mAU*min | 峰高 mAU  | 相对峰面积 % | 相对峰高 % | 样品量 n.a. |
|----|-----|----------|-------------|---------|---------|--------|----------|
| 1  |     | 14.993   | 49.152      | 109.871 | 6.35    | 16.11  | n.a.     |
| 2  |     | 22.637   | 725.133     | 572.201 | 93.65   | 83.89  | n.a.     |

For comparison of Chinese and English of the HPLC data table.

| 序号    | 峰名<br>称      | 保留时间<br>(min)           | 峰面积<br>(mAU*min)       | 峰高<br>(mAU)             | 相对峰面<br>积 (%)                | 相对峰高<br>(%)                    | 样品量<br>n.a.              |
|-------|--------------|-------------------------|------------------------|-------------------------|------------------------------|--------------------------------|--------------------------|
| Entry | Peak<br>name | Retention<br>time (min) | Peak area<br>(mAU*min) | Peak<br>height<br>(mAU) | Relative<br>peak area<br>(%) | Relative<br>Peak height<br>(%) | Sample<br>volume<br>n.a. |

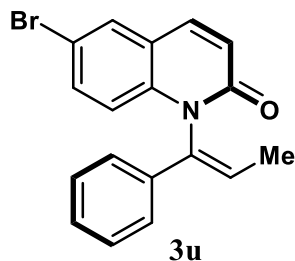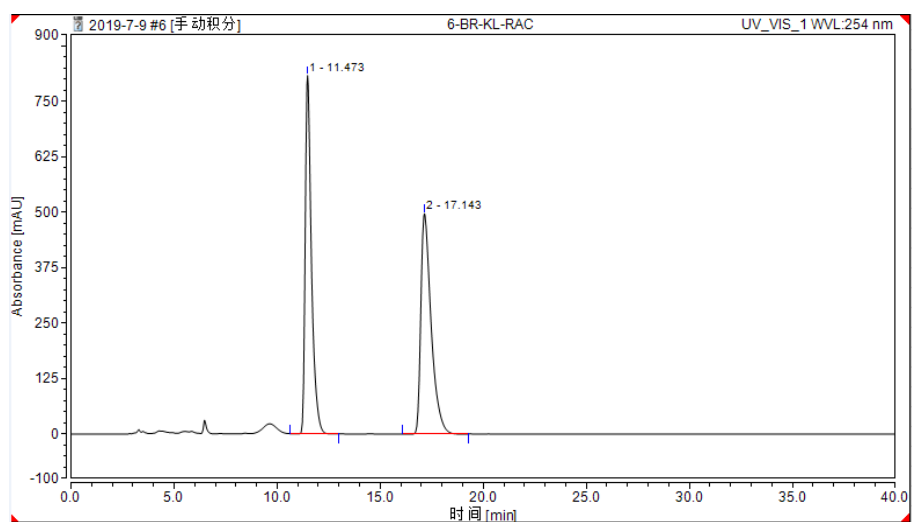

| 积分结果 |     |             |                |           |            |           |             |
|------|-----|-------------|----------------|-----------|------------|-----------|-------------|
| 序号   | 峰名称 | 保留时间<br>min | 峰面积<br>mAU*min | 峰高<br>mAU | 相对峰面积<br>% | 相对峰高<br>% | 样品量<br>n.a. |
| 1    |     | 11.473      | 281.062        | 807.790   | 49.46      | 61.91     | n.a.        |
| 2    |     | 17.143      | 287.236        | 496.992   | 50.54      | 38.09     | n.a.        |

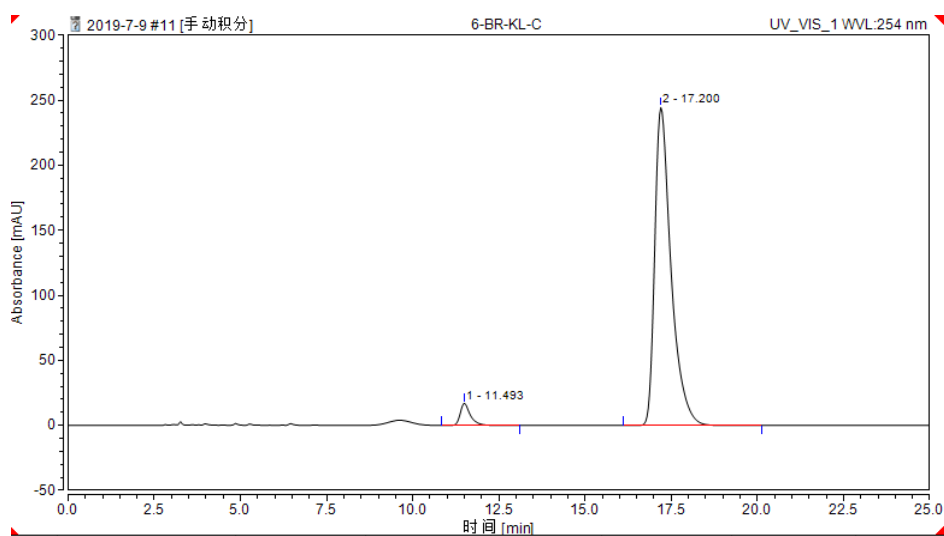

| 积分结果 |     |             |                |           |            |           |             |
|------|-----|-------------|----------------|-----------|------------|-----------|-------------|
| 序号   | 峰名称 | 保留时间<br>min | 峰面积<br>mAU*min | 峰高<br>mAU | 相对峰面积<br>% | 相对峰高<br>% | 样品量<br>n.a. |
| 1    |     | 11.493      | 5.698          | 16.939    | 4.08       | 6.48      | n.a.        |
| 2    |     | 17.200      | 134.130        | 244.571   | 95.92      | 93.52     | n.a.        |

For comparison of Chinese and English of the HPLC data table.

| 序号    | 峰名<br>称      | 保留时间<br>(min)           | 峰面<br>积<br>(mAU*min)   | 峰高<br>(mAU)             | 相对峰面<br>积 (%)                | 相对峰高<br>(%)                    | 样品量<br>n.a.              |
|-------|--------------|-------------------------|------------------------|-------------------------|------------------------------|--------------------------------|--------------------------|
| Entry | Peak<br>name | Retention<br>time (min) | Peak area<br>(mAU*min) | Peak<br>height<br>(mAU) | Relative<br>peak area<br>(%) | Relative<br>Peak height<br>(%) | Sample<br>volume<br>n.a. |

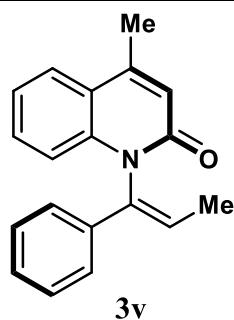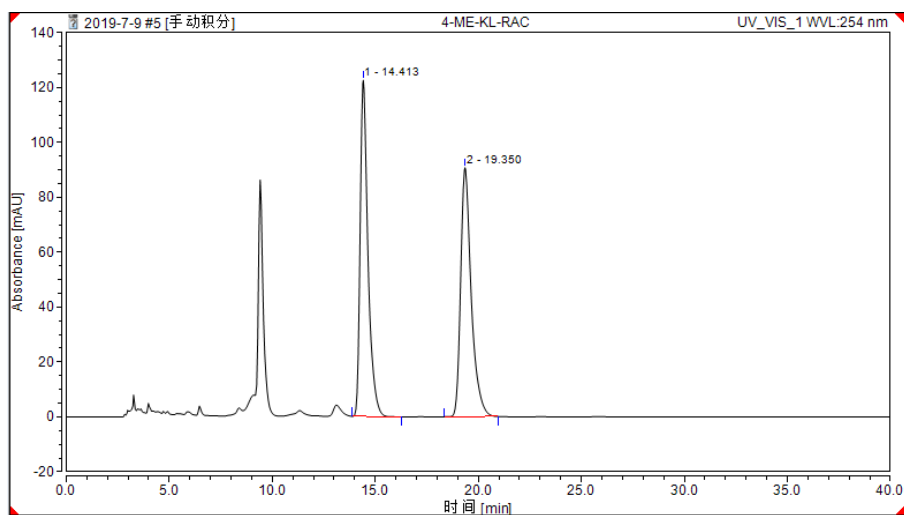

| 序号 | 峰名称 | 保留时间<br>min | 峰面积<br>mAU*min | 峰高<br>mAU | 相对峰面积<br>% | 相对峰高<br>% | 样品量<br>n.a. |
|----|-----|-------------|----------------|-----------|------------|-----------|-------------|
| 1  |     | 14.413      | 53.714         | 122.526   | 49.92      | 57.45     | n.a.        |
| 2  |     | 19.350      | 53.876         | 90.731    | 50.08      | 42.55     | n.a.        |

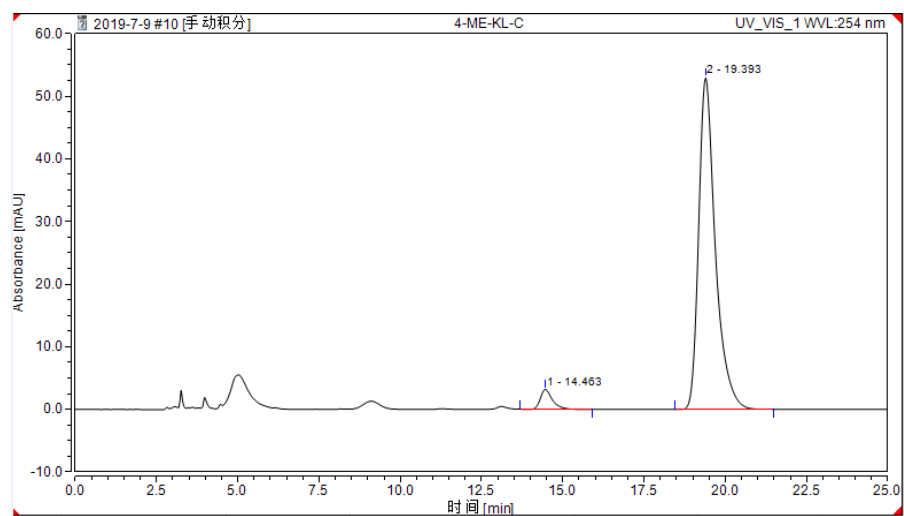

| 序号 | 峰名称 | 保留时间<br>min | 峰面积<br>mAU*min | 峰高<br>mAU | 相对峰面积<br>% | 相对峰高<br>% | 样品量<br>n.a. |
|----|-----|-------------|----------------|-----------|------------|-----------|-------------|
| 1  |     | 14.463      | 1.345          | 3.174     | 4.10       | 5.65      | n.a.        |
| 2  |     | 19.393      | 31.504         | 52.969    | 95.90      | 94.35     | n.a.        |

For comparison of Chinese and English of the HPLC data table.

| 序号    | 峰名<br>称      | 保留时间<br>(min)           | 峰面积<br>(mAU*min)       | 峰高<br>(mAU)             | 相对峰面<br>积 (%)                | 相对峰高<br>(%)                    | 样品量<br>n.a.              |
|-------|--------------|-------------------------|------------------------|-------------------------|------------------------------|--------------------------------|--------------------------|
| Entry | Peak<br>name | Retention<br>time (min) | Peak area<br>(mAU*min) | Peak<br>height<br>(mAU) | Relative<br>peak area<br>(%) | Relative<br>Peak height<br>(%) | Sample<br>volume<br>n.a. |

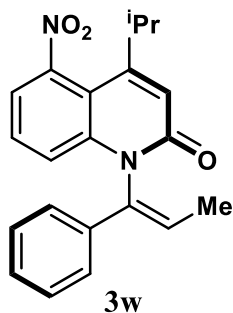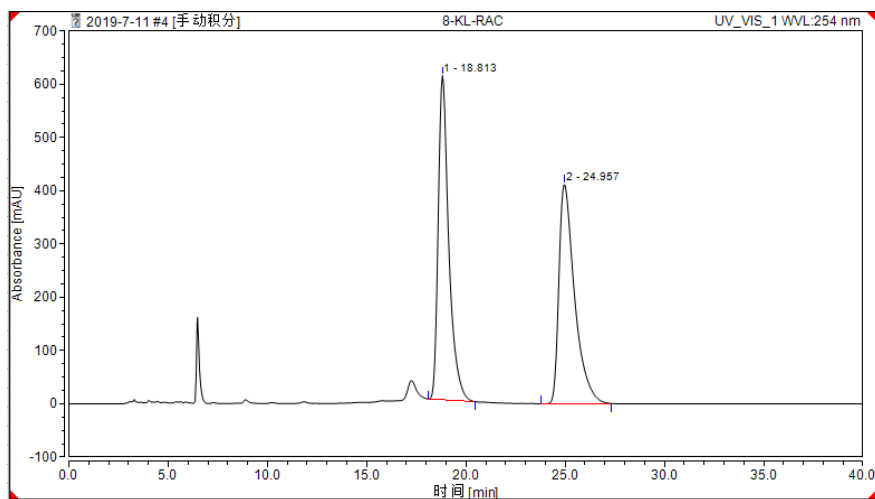

| 积分结果 |     |             |                |           |            |           |             |
|------|-----|-------------|----------------|-----------|------------|-----------|-------------|
| 序号   | 峰名称 | 保留时间<br>min | 峰面积<br>mAU*min | 峰高<br>mAU | 相对峰面积<br>% | 相对峰高<br>% | 样品量<br>n.a. |
| 1    |     | 18.813      | 375.763        | 609.378   | 50.03      | 59.66     | n.a.        |
| 2    |     | 24.957      | 375.297        | 412.077   | 49.97      | 40.34     | n.a.        |

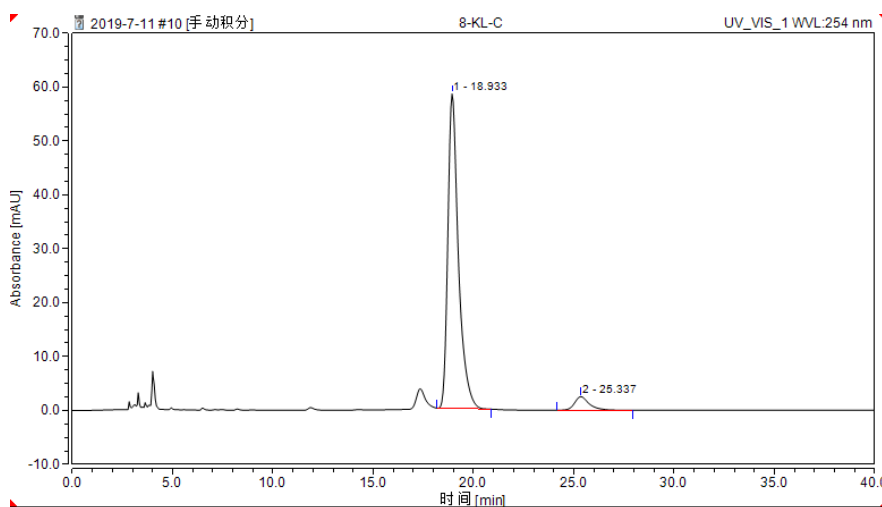

| 积分结果 |     |             |                |           |            |           |             |
|------|-----|-------------|----------------|-----------|------------|-----------|-------------|
| 序号   | 峰名称 | 保留时间<br>min | 峰面积<br>mAU*min | 峰高<br>mAU | 相对峰面积<br>% | 相对峰高<br>% | 样品量<br>n.a. |
| 1    |     | 18.933      | 35.666         | 58.391    | 94.44      | 95.89     | n.a.        |
| 2    |     | 25.337      | 2.102          | 2.505     | 5.56       | 4.11      | n.a.        |

For comparison of Chinese and English of the HPLC data table.

| 序号    | 峰名<br>称      | 保留时间<br>(min)           | 峰面积<br>(mAU*min)       | 峰高<br>(mAU)             | 相对峰面<br>积 (%)                | 相对峰高<br>(%)                    | 样品量<br>n.a.              |
|-------|--------------|-------------------------|------------------------|-------------------------|------------------------------|--------------------------------|--------------------------|
| Entry | Peak<br>name | Retention<br>time (min) | Peak area<br>(mAU*min) | Peak<br>height<br>(mAU) | Relative<br>peak area<br>(%) | Relative<br>Peak height<br>(%) | Sample<br>volume<br>n.a. |

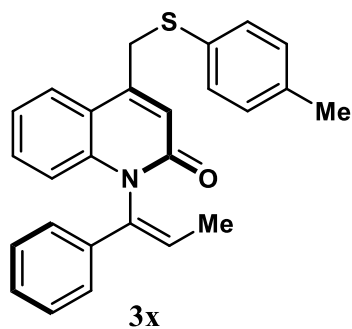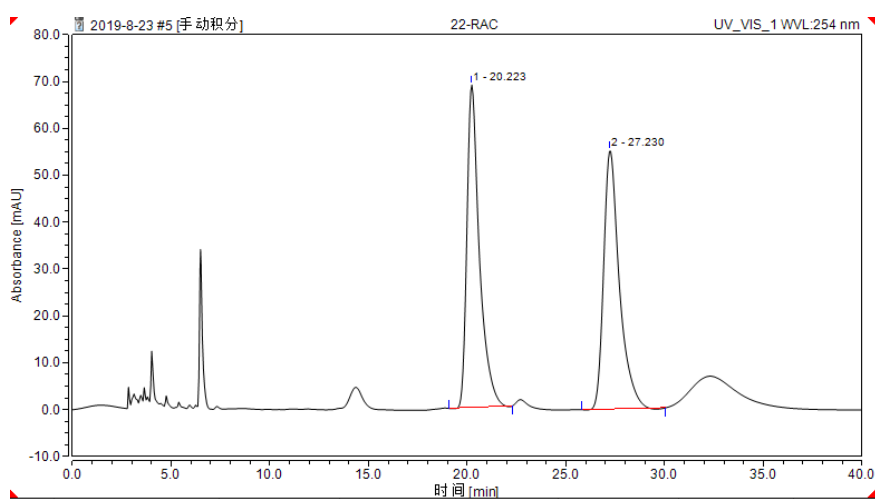

| 积分结果 |     |             |                |           |            |           |             |
|------|-----|-------------|----------------|-----------|------------|-----------|-------------|
| 序号   | 峰名称 | 保留时间<br>min | 峰面积<br>mAU*min | 峰高<br>mAU | 相对峰面积<br>% | 相对峰高<br>% | 样品量<br>n.a. |
| 1    |     | 20.223      | 50.319         | 68.839    | 49.75      | 55.50     | n.a.        |
| 2    |     | 27.230      | 50.824         | 55.205    | 50.25      | 44.50     | n.a.        |

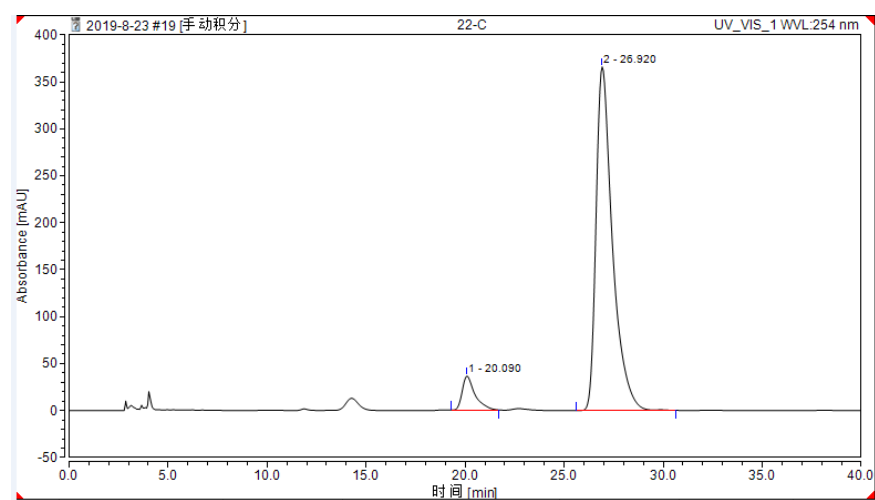

| 积分结果 |     |             |                |           |            |           |             |
|------|-----|-------------|----------------|-----------|------------|-----------|-------------|
| 序号   | 峰名称 | 保留时间<br>min | 峰面积<br>mAU*min | 峰高<br>mAU | 相对峰面积<br>% | 相对峰高<br>% | 样品量<br>n.a. |
| 1    |     | 20.090      | 26.777         | 36.149    | 7.08       | 8.99      | n.a.        |
| 2    |     | 26.920      | 351.613        | 365.992   | 92.92      | 91.01     | n.a.        |

For comparison of Chinese and English of the HPLC data table.

| 序号    | 峰名称       | 保留时间 (min)           | 峰面积 (mAU*min)       | 峰高 (mAU)          | 相对峰面积 (%)              | 相对峰高 (%)                 | 样品量 n.a.           |
|-------|-----------|----------------------|---------------------|-------------------|------------------------|--------------------------|--------------------|
| Entry | Peak name | Retention time (min) | Peak area (mAU*min) | Peak height (mAU) | Relative peak area (%) | Relative Peak height (%) | Sample volume n.a. |

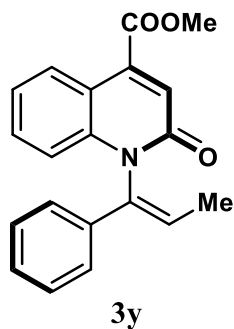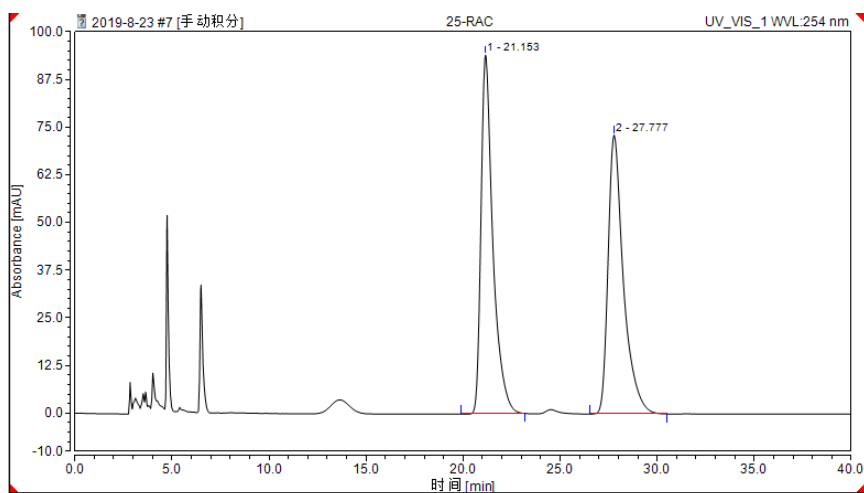

| 序号 | 峰名称 | 保留时间 min | 峰面积 mAU*min | 峰高 mAU | 相对峰面积 % | 相对峰高 % | 样品量 n.a. |
|----|-----|----------|-------------|--------|---------|--------|----------|
| 1  |     | 21.153   | 66.566      | 94.017 | 49.87   | 56.24  | n.a.     |
| 2  |     | 27.777   | 66.911      | 73.146 | 50.13   | 43.76  | n.a.     |

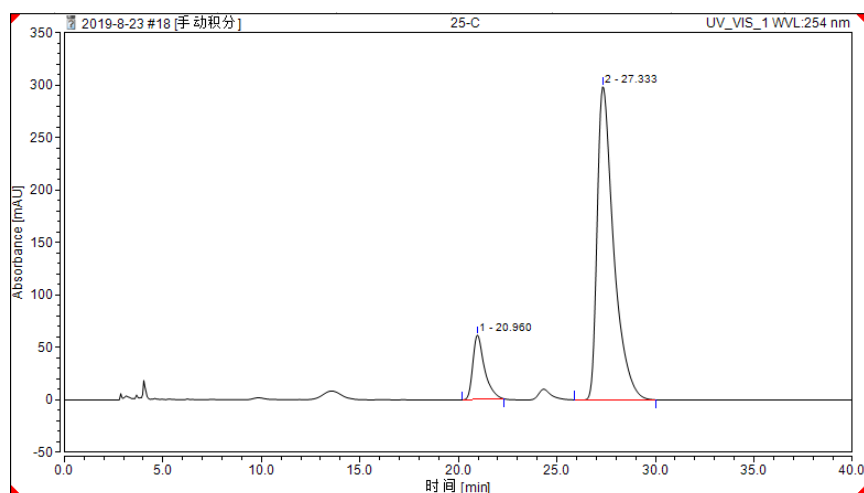

| 序号 | 峰名称 | 保留时间 min | 峰面积 mAU*min | 峰高 mAU  | 相对峰面积 % | 相对峰高 % | 样品量 n.a. |
|----|-----|----------|-------------|---------|---------|--------|----------|
| 1  |     | 20.960   | 42.111      | 61.486  | 12.70   | 17.05  | n.a.     |
| 2  |     | 27.333   | 289.473     | 299.117 | 87.30   | 82.95  | n.a.     |



For comparison of Chinese and English of the HPLC data table.

| 序号    | 峰名<br>称      | 保留时间<br>(min)           | 峰面积<br>(mAU*min)       | 峰高<br>(mAU)             | 相对峰面<br>积 (%)                | 相对峰高<br>(%)                    | 样品量<br>n.a.              |
|-------|--------------|-------------------------|------------------------|-------------------------|------------------------------|--------------------------------|--------------------------|
| Entry | Peak<br>name | Retention<br>time (min) | Peak area<br>(mAU*min) | Peak<br>height<br>(mAU) | Relative<br>peak area<br>(%) | Relative<br>Peak height<br>(%) | Sample<br>volume<br>n.a. |

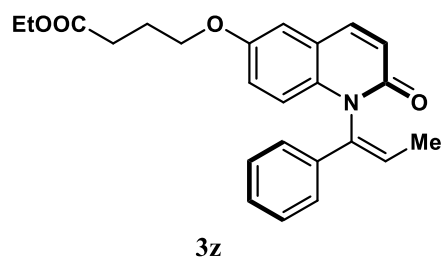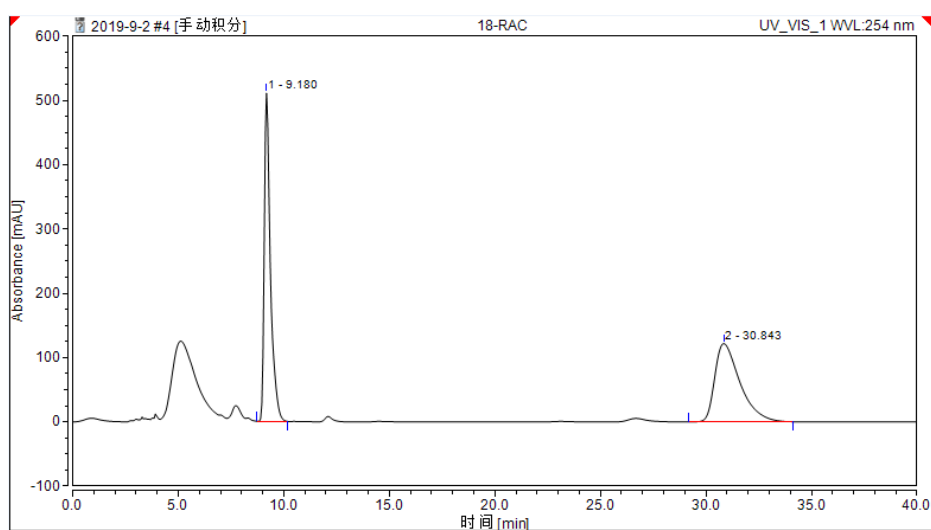

| 积分结果 |     |             |                |           |            |           |             |
|------|-----|-------------|----------------|-----------|------------|-----------|-------------|
| 序号   | 峰名称 | 保留时间<br>min | 峰面积<br>mAU*min | 峰高<br>mAU | 相对峰面积<br>% | 相对峰高<br>% | 样品量<br>n.a. |
| 1    |     | 9.180       | 171.306        | 510.471   | 50.45      | 80.74     | n.a.        |
| 2    |     | 30.843      | 168.260        | 121.797   | 49.55      | 19.26     | n.a.        |

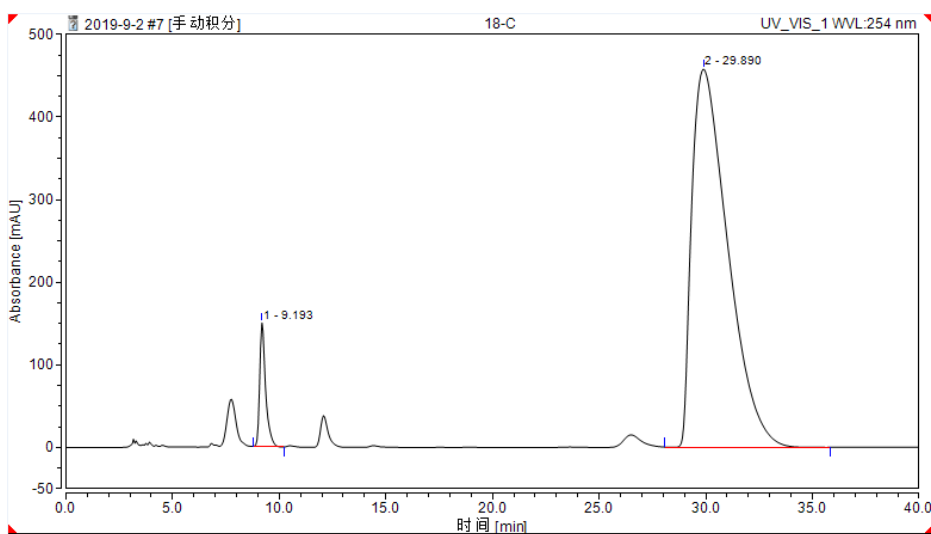

| 积分结果 |     |             |                |           |            |           |             |
|------|-----|-------------|----------------|-----------|------------|-----------|-------------|
| 序号   | 峰名称 | 保留时间<br>min | 峰面积<br>mAU*min | 峰高<br>mAU | 相对峰面积<br>% | 相对峰高<br>% | 样品量<br>n.a. |
| 1    |     | 9.193       | 47.972         | 149.637   | 5.09       | 24.65     | n.a.        |
| 2    |     | 29.890      | 893.997        | 457.478   | 94.91      | 75.35     | n.a.        |

For comparison of Chinese and English of the HPLC data table.

| 序号    | 峰名称       | 保留时间 (min)           | 峰面积 (mAU*min)       | 峰高 (mAU)          | 相对峰面积 (%)              | 相对峰高 (%)                 | 样品量 n.a.           |
|-------|-----------|----------------------|---------------------|-------------------|------------------------|--------------------------|--------------------|
| Entry | Peak name | Retention time (min) | Peak area (mAU*min) | Peak height (mAU) | Relative peak area (%) | Relative Peak height (%) | Sample volume n.a. |

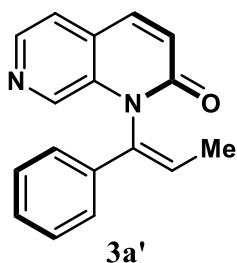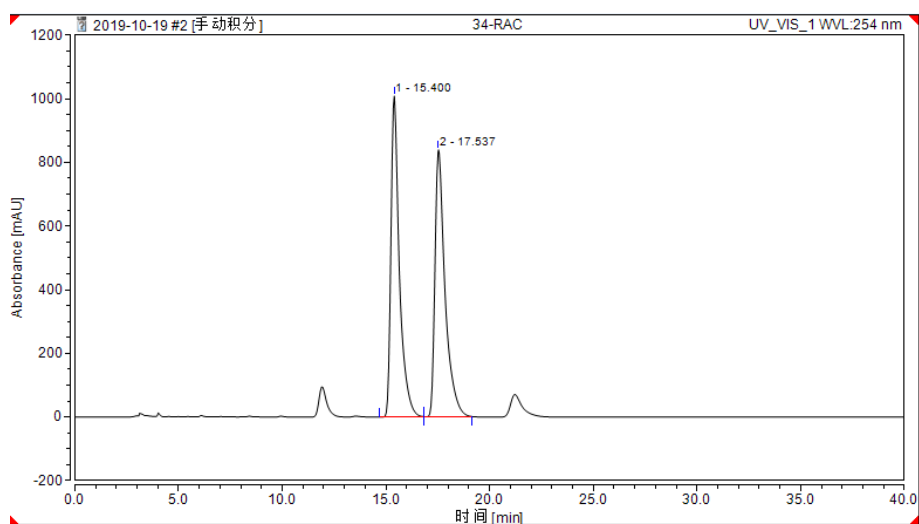

| 积分结果 |     |          |             |          |         |        |          |
|------|-----|----------|-------------|----------|---------|--------|----------|
| 序号   | 峰名称 | 保留时间 min | 峰面积 mAU*min | 峰高 mAU   | 相对峰面积 % | 相对峰高 % | 样品量 n.a. |
| 1    |     | 15.400   | 473.087     | 1008.396 | 50.01   | 54.58  | n.a.     |
| 2    |     | 17.537   | 472.861     | 839.038  | 49.99   | 45.42  | n.a.     |

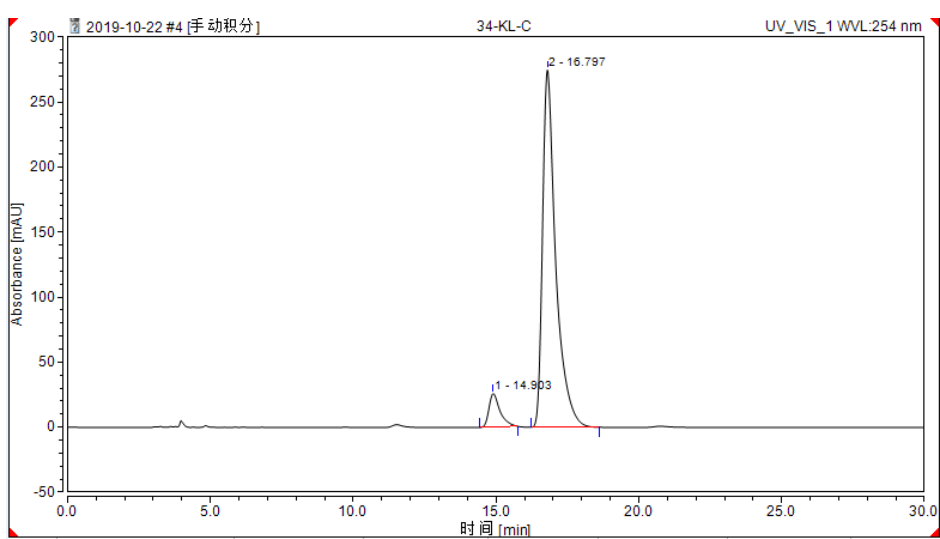

| 积分结果 |     |          |             |         |         |        |          |
|------|-----|----------|-------------|---------|---------|--------|----------|
| 序号   | 峰名称 | 保留时间 min | 峰面积 mAU*min | 峰高 mAU  | 相对峰面积 % | 相对峰高 % | 样品量 n.a. |
| 1    |     | 14.903   | 11.488      | 25.819  | 7.25    | 8.59   | n.a.     |
| 2    |     | 16.797   | 147.058     | 274.793 | 92.75   | 91.41  | n.a.     |

For comparison of Chinese and English of the HPLC data table.

| 序号    | 峰名<br>称      | 保留时间<br>(min)           | 峰面积<br>(mAU*min)       | 峰高<br>(mAU)             | 相对峰面<br>积 (%)                | 相对峰高<br>(%)                    | 样品量<br>n.a.              |
|-------|--------------|-------------------------|------------------------|-------------------------|------------------------------|--------------------------------|--------------------------|
| Entry | Peak<br>name | Retention<br>time (min) | Peak area<br>(mAU*min) | Peak<br>height<br>(mAU) | Relative<br>peak area<br>(%) | Relative<br>Peak height<br>(%) | Sample<br>volume<br>n.a. |

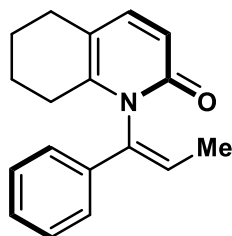

3b'

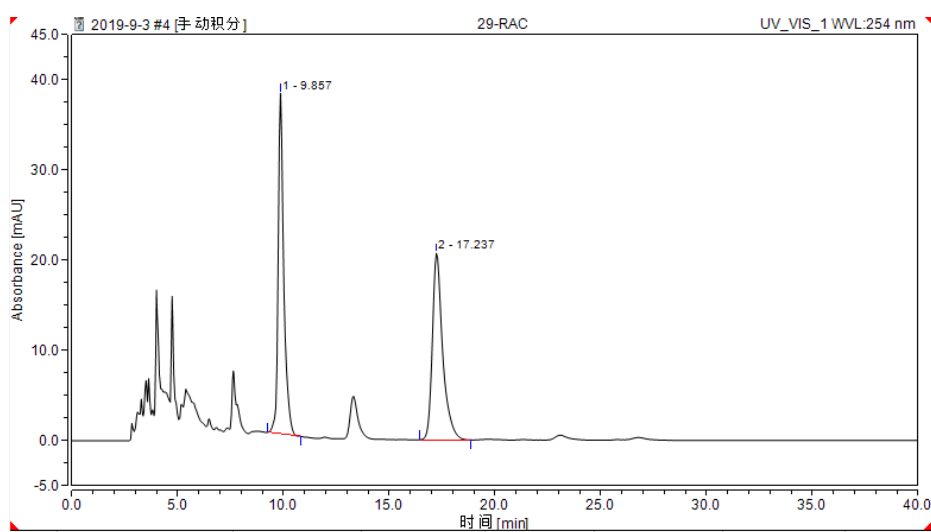

| 积分结果 |     |             |                |           |            |           |             |
|------|-----|-------------|----------------|-----------|------------|-----------|-------------|
| 序号   | 峰名称 | 保留时间<br>min | 峰面积<br>mAU*min | 峰高<br>mAU | 相对峰面积<br>% | 相对峰高<br>% | 样品量<br>n.a. |
| 1    |     | 9.857       | 11.521         | 37.727    | 49.71      | 64.56     | n.a.        |
| 2    |     | 17.237      | 11.656         | 20.706    | 50.29      | 35.44     | n.a.        |

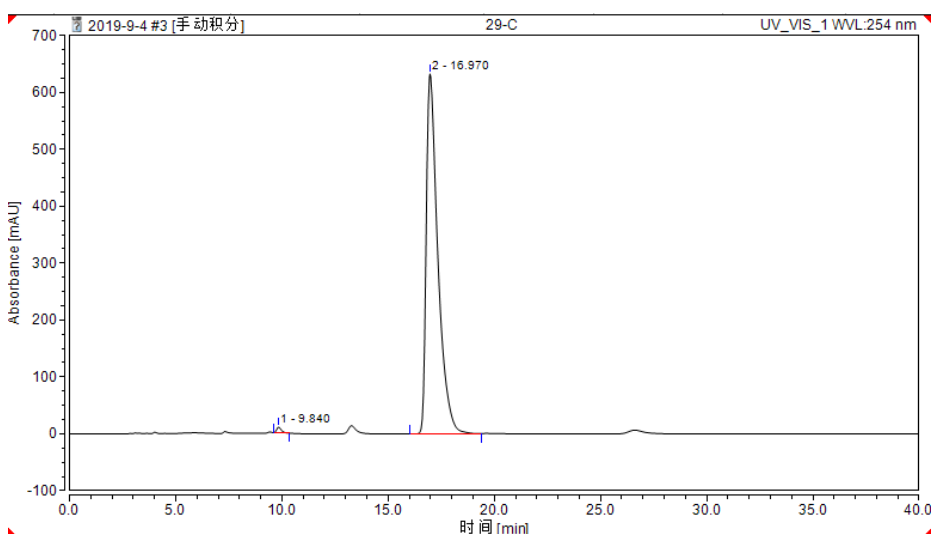

| 积分结果 |     |             |                |           |            |           |             |
|------|-----|-------------|----------------|-----------|------------|-----------|-------------|
| 序号   | 峰名称 | 保留时间<br>min | 峰面积<br>mAU*min | 峰高<br>mAU | 相对峰面积<br>% | 相对峰高<br>% | 样品量<br>n.a. |
| 1    |     | 9.840       | 2.502          | 10.020    | 0.62       | 1.56      | n.a.        |
| 2    |     | 16.970      | 399.375        | 632.615   | 99.38      | 98.44     | n.a.        |

For comparison of Chinese and English of the HPLC data table.

| 序号    | 峰名<br>称      | 保留时间<br>(min)           | 峰面积<br>(mAU*min)       | 峰高<br>(mAU)             | 相对峰面<br>积 (%)                | 相对峰高<br>(%)                    | 样品量<br>n.a.              |
|-------|--------------|-------------------------|------------------------|-------------------------|------------------------------|--------------------------------|--------------------------|
| Entry | Peak<br>name | Retention<br>time (min) | Peak area<br>(mAU*min) | Peak<br>height<br>(mAU) | Relative<br>peak area<br>(%) | Relative<br>Peak height<br>(%) | Sample<br>volume<br>n.a. |

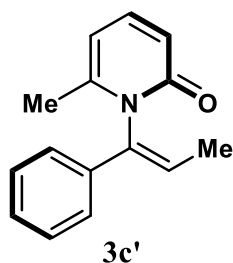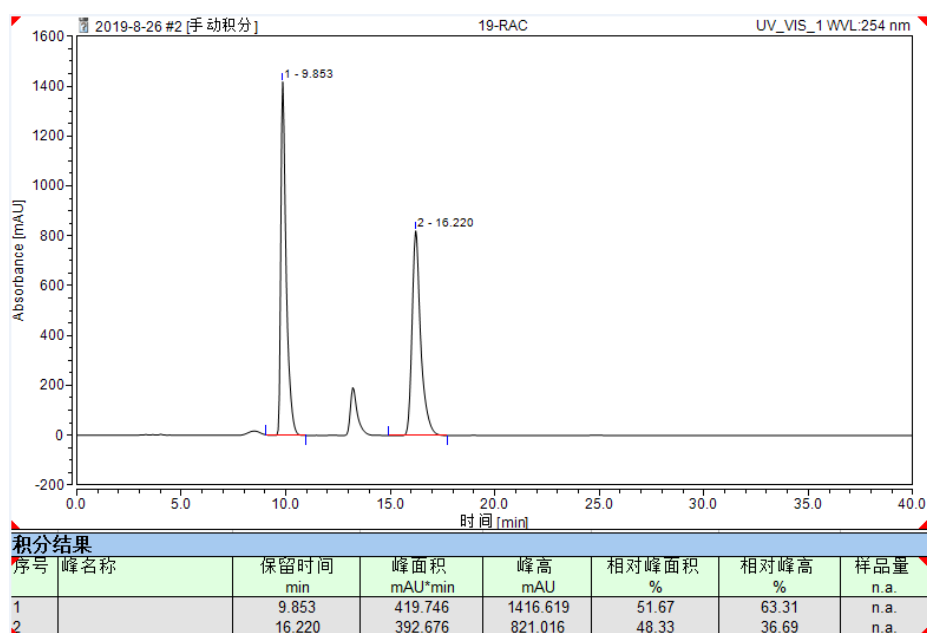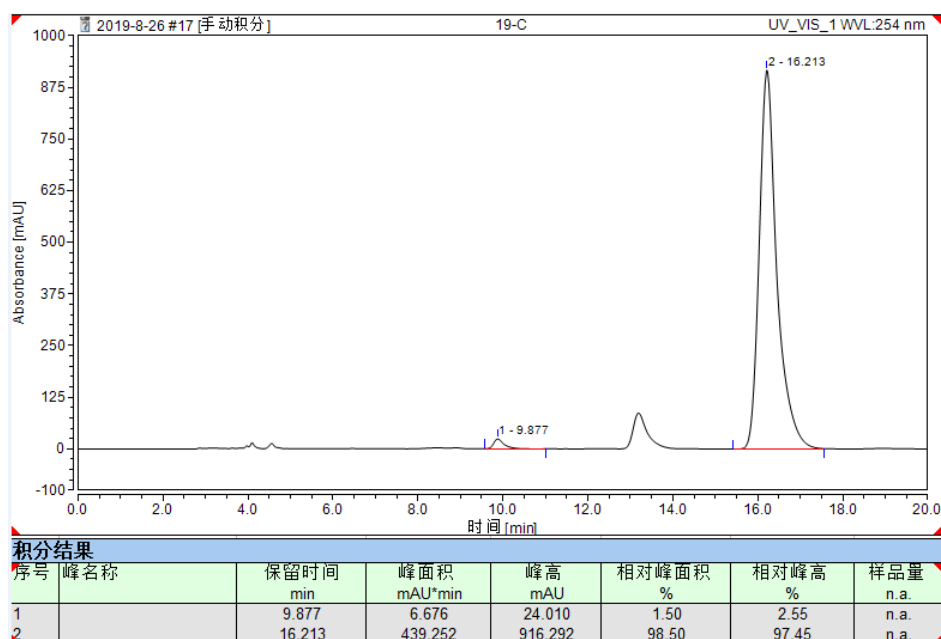

For comparison of Chinese and English of the HPLC data table.

| 序号    | 峰名<br>称      | 保留时间<br>(min)           | 峰面积<br>(mAU*min)       | 峰高<br>(mAU)             | 相对峰面<br>积 (%)                | 相对峰高<br>(%)                    | 样品量<br>n.a.              |
|-------|--------------|-------------------------|------------------------|-------------------------|------------------------------|--------------------------------|--------------------------|
| Entry | Peak<br>name | Retention<br>time (min) | Peak area<br>(mAU*min) | Peak<br>height<br>(mAU) | Relative<br>peak area<br>(%) | Relative<br>Peak height<br>(%) | Sample<br>volume<br>n.a. |

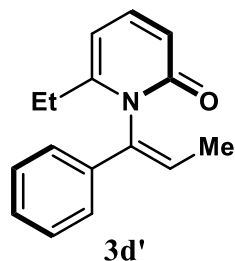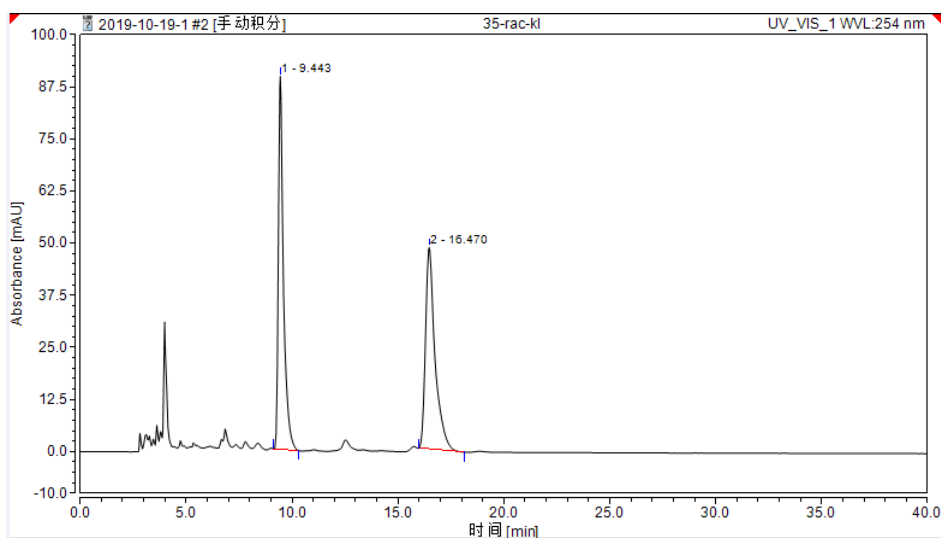

| 积分结果 |     |             |                |           |            |           |             |
|------|-----|-------------|----------------|-----------|------------|-----------|-------------|
| 序号   | 峰名称 | 保留时间<br>min | 峰面积<br>mAU*min | 峰高<br>mAU | 相对峰面积<br>% | 相对峰高<br>% | 样品量<br>n.a. |
| 1    |     | 9.443       | 24.982         | 89.484    | 49.84      | 64.95     | n.a.        |
| 2    |     | 16.470      | 25.144         | 48.299    | 50.16      | 35.05     | n.a.        |

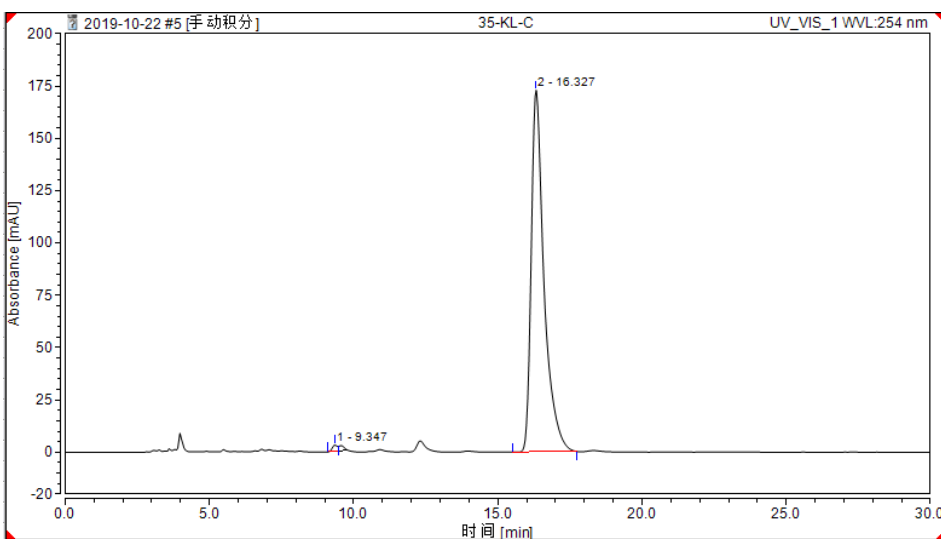

| 积分结果 |     |             |                |           |            |           |             |
|------|-----|-------------|----------------|-----------|------------|-----------|-------------|
| 序号   | 峰名称 | 保留时间<br>min | 峰面积<br>mAU*min | 峰高<br>mAU | 相对峰面积<br>% | 相对峰高<br>% | 样品量<br>n.a. |
| 1    |     | 9.347       | 0.611          | 3.027     | 0.68       | 1.72      | n.a.        |
| 2    |     | 16.327      | 89.053         | 172.865   | 99.32      | 98.28     | n.a.        |

For comparison of Chinese and English of the HPLC data table.

| 序号    | 峰名称       | 保留时间 (min)           | 峰面积 (mAU*min)       | 峰高 (mAU)          | 相对峰面积 (%)              | 相对峰高 (%)                 | 样品量           |
|-------|-----------|----------------------|---------------------|-------------------|------------------------|--------------------------|---------------|
| Entry | Peak name | Retention time (min) | Peak area (mAU*min) | Peak height (mAU) | Relative peak area (%) | Relative Peak height (%) | Sample volume |
|       |           |                      |                     |                   |                        |                          | n.a.          |
|       |           |                      |                     |                   |                        |                          | n.a.          |

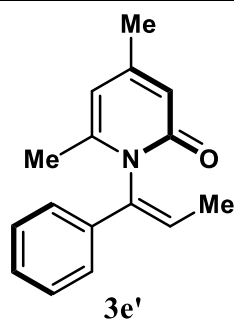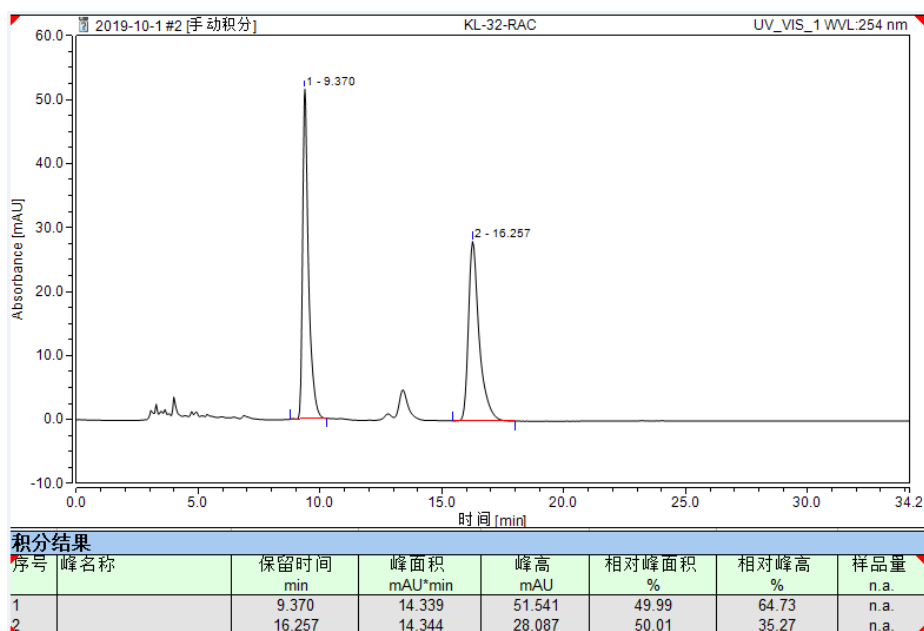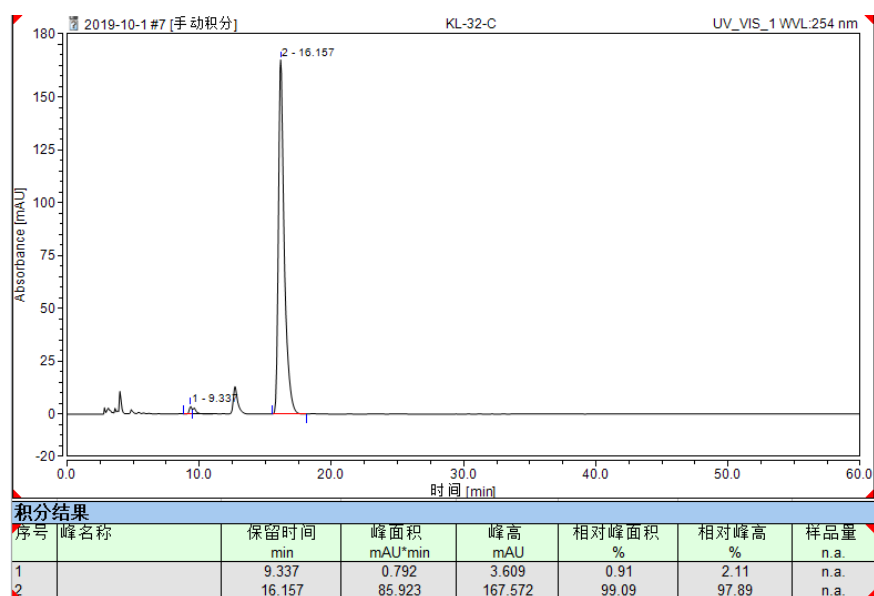

For comparison of Chinese and English of the HPLC data table.

| 序号    | 峰名<br>称      | 保留时间<br>(min)           | 峰面积<br>(mAU*min)       | 峰高<br>(mAU)             | 相对峰面<br>积 (%)                | 相对峰高<br>(%)                    | 样品量<br>n.a.              |
|-------|--------------|-------------------------|------------------------|-------------------------|------------------------------|--------------------------------|--------------------------|
| Entry | Peak<br>name | Retention<br>time (min) | Peak area<br>(mAU*min) | Peak<br>height<br>(mAU) | Relative<br>peak area<br>(%) | Relative<br>Peak height<br>(%) | Sample<br>volume<br>n.a. |

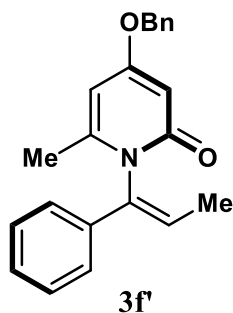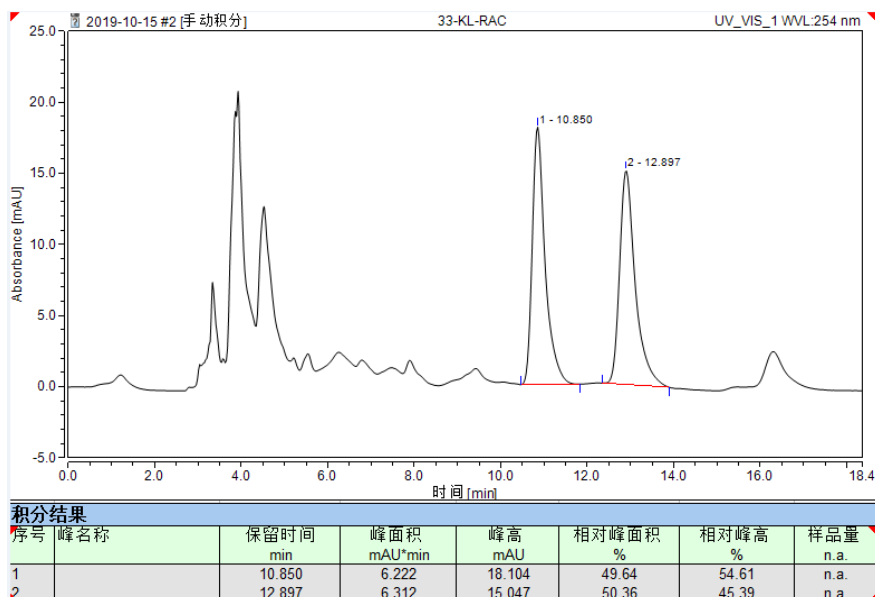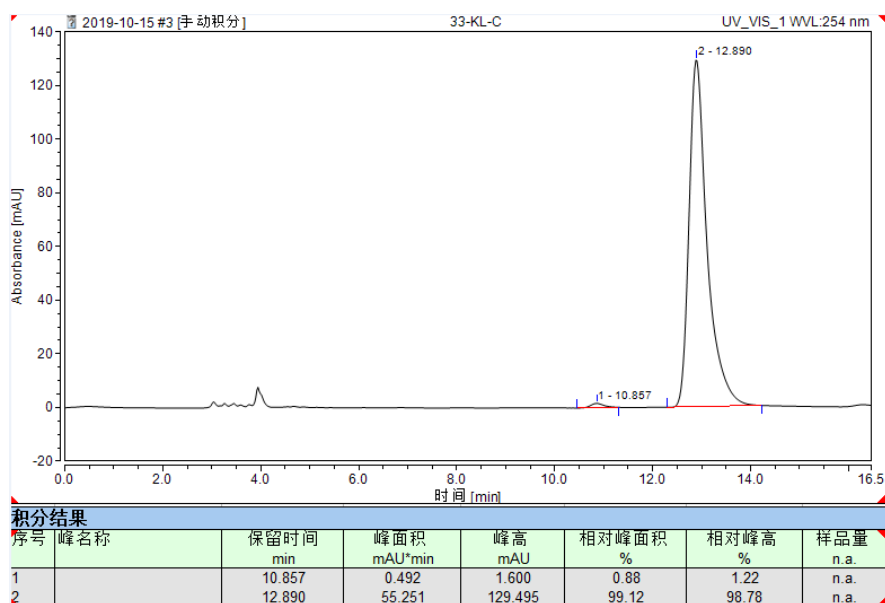

For comparison of Chinese and English of the HPLC data table.

| 序号    | 峰名称       | 保留时间 (min)           | 峰面积 (mAU*min)       | 峰高 (mAU)          | 相对峰面积 (%)              | 相对峰高 (%)                 | 样品量 n.a.           |
|-------|-----------|----------------------|---------------------|-------------------|------------------------|--------------------------|--------------------|
| Entry | Peak name | Retention time (min) | Peak area (mAU*min) | Peak height (mAU) | Relative peak area (%) | Relative Peak height (%) | Sample volume n.a. |

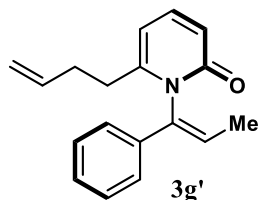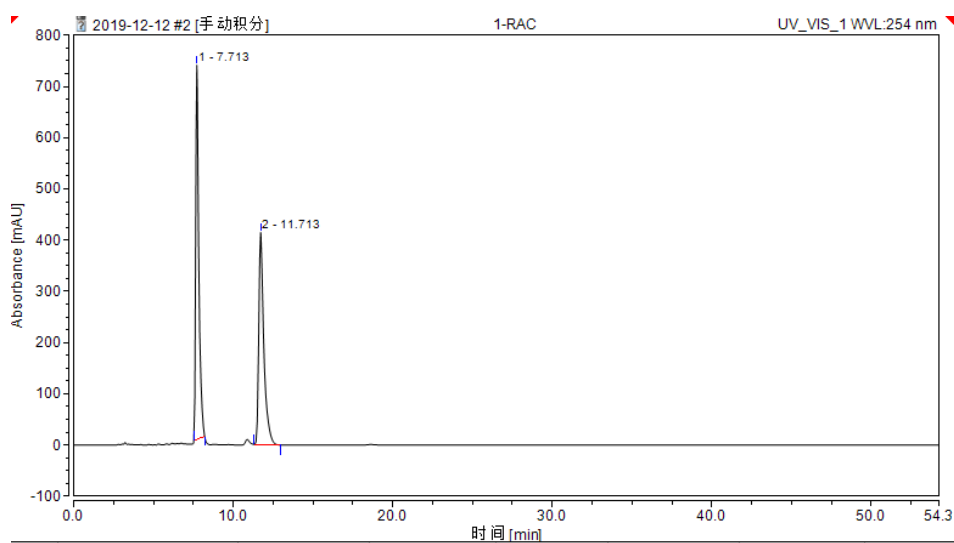

| 积分结果 |     |          |             |         |         |        |          |
|------|-----|----------|-------------|---------|---------|--------|----------|
| 序号   | 峰名称 | 保留时间 min | 峰面积 mAU*min | 峰高 mAU  | 相对峰面积 % | 相对峰高 % | 样品量 n.a. |
| 1    |     | 7.713    | 163.125     | 730.670 | 51.86   | 63.84  | n.a.     |
| 2    |     | 11.713   | 151.421     | 413.806 | 48.14   | 36.16  | n.a.     |

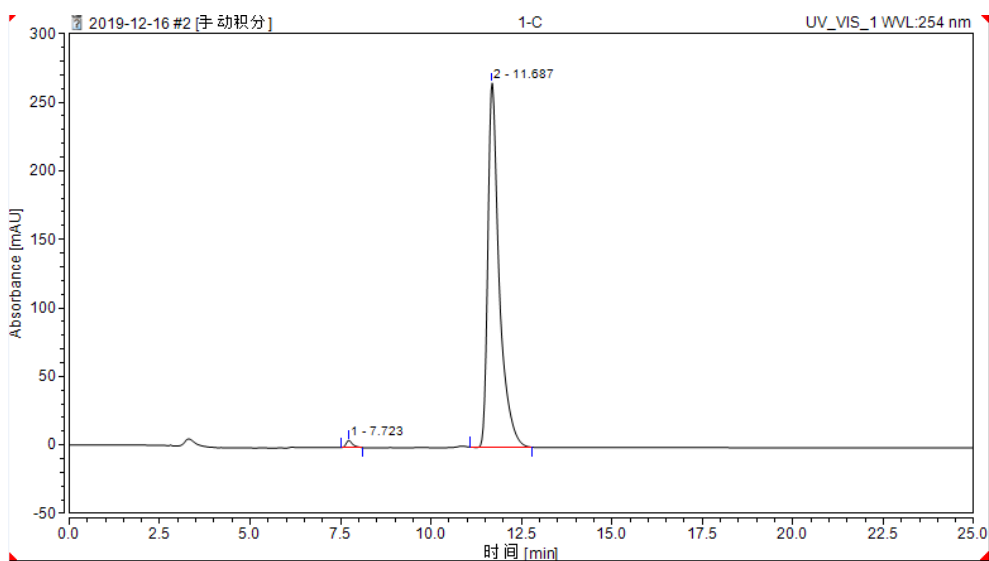

| 积分结果 |     |          |             |         |         |        |          |
|------|-----|----------|-------------|---------|---------|--------|----------|
| 序号   | 峰名称 | 保留时间 min | 峰面积 mAU*min | 峰高 mAU  | 相对峰面积 % | 相对峰高 % | 样品量 n.a. |
| 1    |     | 7.723    | 1.068       | 5.214   | 1.09    | 1.92   | n.a.     |
| 2    |     | 11.687   | 96.540      | 265.760 | 98.91   | 98.08  | n.a.     |



For comparison of Chinese and English of the HPLC data table.

| 序号    | 峰名称       | 保留时间 (min)           | 峰面积 (mAU*min)       | 峰高 (mAU)          | 相对峰面积 (%)              | 相对峰高 (%)                 | 样品量 n.a.           |
|-------|-----------|----------------------|---------------------|-------------------|------------------------|--------------------------|--------------------|
| Entry | Peak name | Retention time (min) | Peak area (mAU*min) | Peak height (mAU) | Relative peak area (%) | Relative Peak height (%) | Sample volume n.a. |

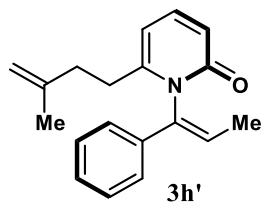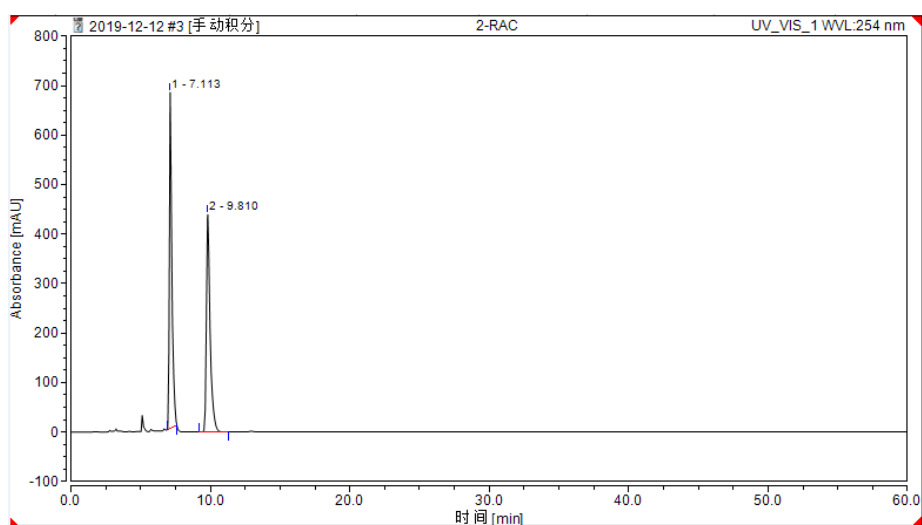

| 积分结果 |     |          |             |         |         |        |          |
|------|-----|----------|-------------|---------|---------|--------|----------|
| 序号   | 峰名称 | 保留时间 min | 峰面积 mAU*min | 峰高 mAU  | 相对峰面积 % | 相对峰高 % | 样品量 n.a. |
| 1    |     | 7.113    | 142.858     | 679.021 | 51.39   | 60.75  | n.a.     |
| 2    |     | 9.810    | 135.112     | 438.713 | 48.61   | 39.25  | n.a.     |

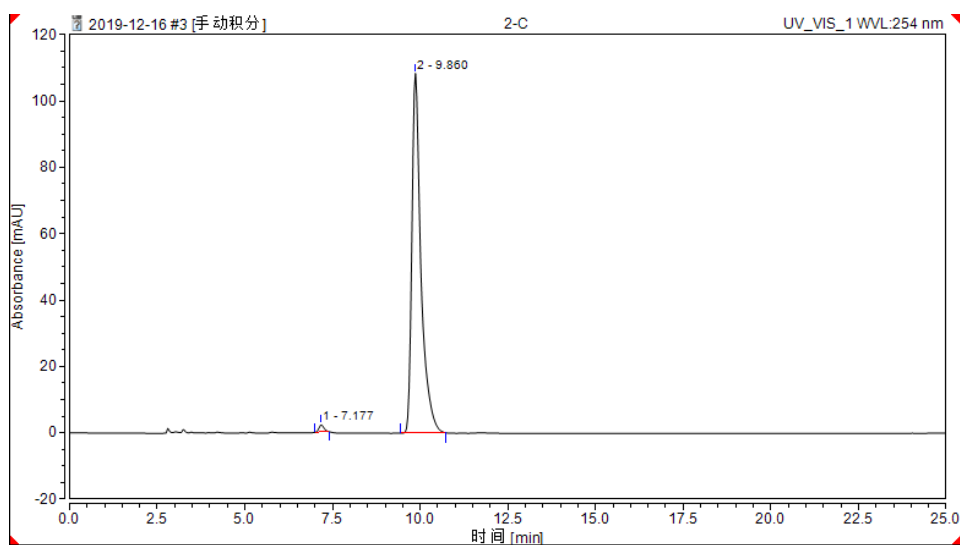

| 积分结果 |     |          |             |         |         |        |          |
|------|-----|----------|-------------|---------|---------|--------|----------|
| 序号   | 峰名称 | 保留时间 min | 峰面积 mAU*min | 峰高 mAU  | 相对峰面积 % | 相对峰高 % | 样品量 n.a. |
| 1    |     | 7.177    | 0.350       | 2.169   | 1.07    | 1.96   | n.a.     |
| 2    |     | 9.860    | 32.534      | 108.465 | 98.93   | 98.04  | n.a.     |

For comparison of Chinese and English of the HPLC data table.

| 序号    | 峰名称       | 保留时间 (min)           | 峰面积 (mAU*min)       | 峰高 (mAU)          | 相对峰面积 (%)              | 相对峰高 (%)                 | 样品量 n.a.           |
|-------|-----------|----------------------|---------------------|-------------------|------------------------|--------------------------|--------------------|
| Entry | Peak name | Retention time (min) | Peak area (mAU*min) | Peak height (mAU) | Relative peak area (%) | Relative Peak height (%) | Sample volume n.a. |

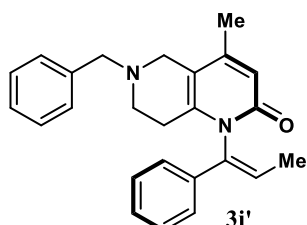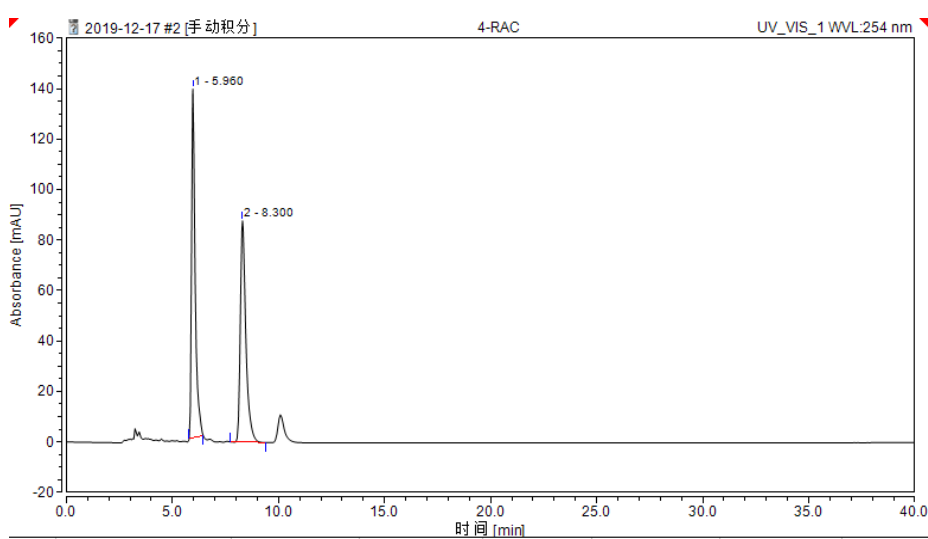

| 积分结果 |     |          |             |         |         |        |          |
|------|-----|----------|-------------|---------|---------|--------|----------|
| 序号   | 峰名称 | 保留时间 min | 峰面积 mAU*min | 峰高 mAU  | 相对峰面积 % | 相对峰高 % | 样品量 n.a. |
| 1    |     | 5.960    | 27.075      | 138.207 | 50.61   | 61.17  | n.a.     |
| 2    |     | 8.300    | 26.425      | 87.722  | 49.39   | 38.83  | n.a.     |

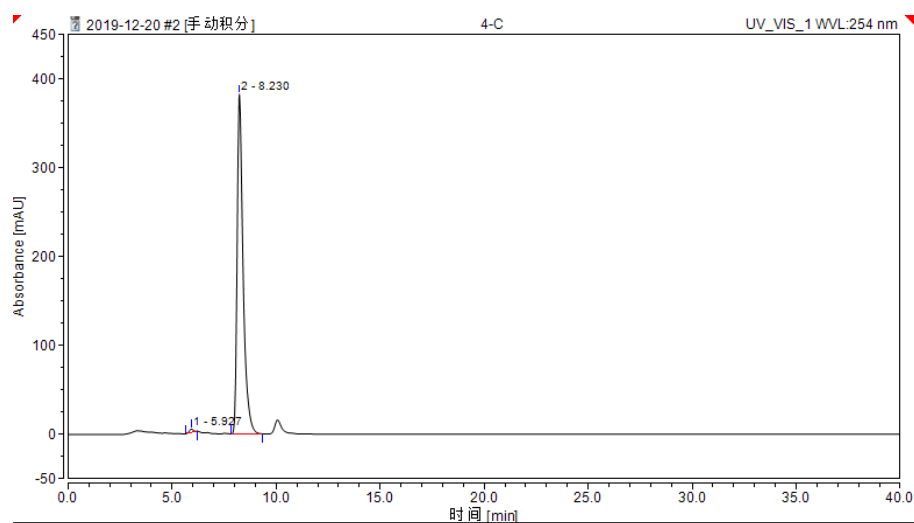

| 积分结果 |     |          |             |         |         |        |          |
|------|-----|----------|-------------|---------|---------|--------|----------|
| 序号   | 峰名称 | 保留时间 min | 峰面积 mAU*min | 峰高 mAU  | 相对峰面积 % | 相对峰高 % | 样品量 n.a. |
| 1    |     | 5.927    | 0.832       | 3.860   | 0.65    | 1.00   | n.a.     |
| 2    |     | 8.230    | 126.630     | 382.383 | 99.35   | 99.00  | n.a.     |

For comparison of Chinese and English of the HPLC data table.

| 序号    | 峰名称       | 保留时间 (min)           | 峰面积 (mAU*min)       | 峰高 (mAU)          | 相对峰面积 (%)              | 相对峰高 (%)                 | 样品量 n.a.           |
|-------|-----------|----------------------|---------------------|-------------------|------------------------|--------------------------|--------------------|
| Entry | Peak name | Retention time (min) | Peak area (mAU*min) | Peak height (mAU) | Relative peak area (%) | Relative Peak height (%) | Sample volume n.a. |

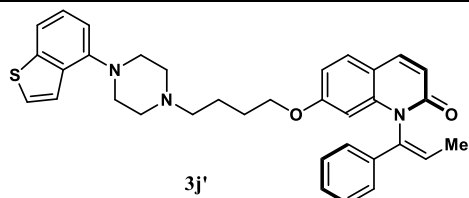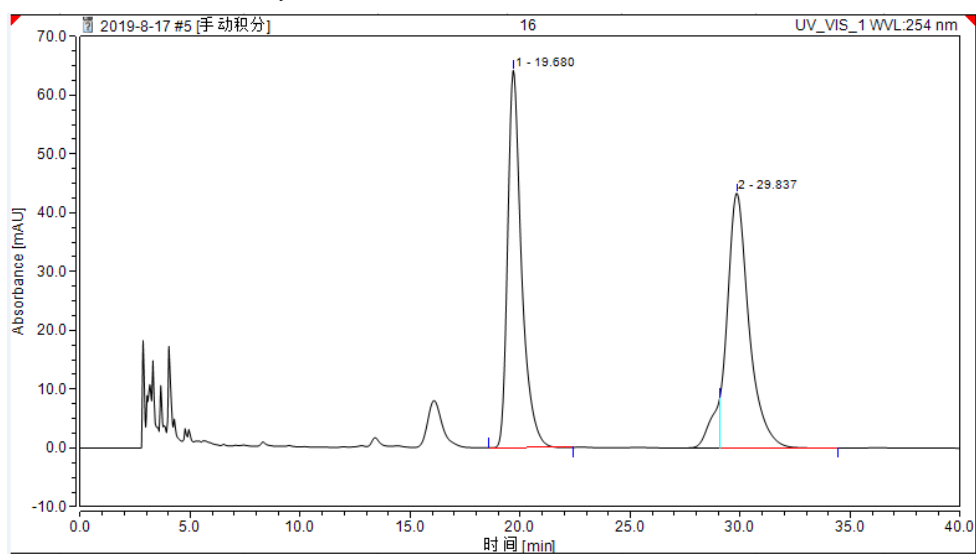

| 积分结果 |     |          |             |        |         |        |          |
|------|-----|----------|-------------|--------|---------|--------|----------|
| 序号   | 峰名称 | 保留时间 min | 峰面积 mAU*min | 峰高 mAU | 相对峰面积 % | 相对峰高 % | 样品量 n.a. |
| 1    |     | 19.680   | 46.845      | 64.177 | 48.97   | 59.68  | n.a.     |
| 2    |     | 29.837   | 48.813      | 43.366 | 51.03   | 40.32  | n.a.     |

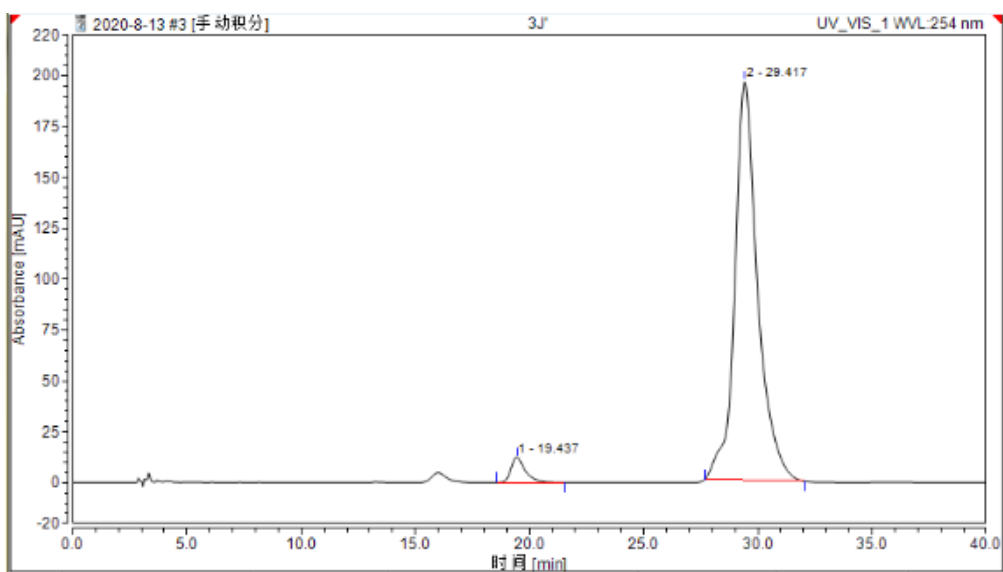

| 积分结果 |     |          |             |         |         |        |          |
|------|-----|----------|-------------|---------|---------|--------|----------|
| 序号   | 峰名称 | 保留时间 min | 峰面积 mAU*min | 峰高 mAU  | 相对峰面积 % | 相对峰高 % | 样品量 n.a. |
| 1    |     | 19.437   | 9.090       | 12.513  | 3.84    | 6.01   | n.a.     |
| 2    |     | 29.417   | 227.717     | 195.806 | 96.16   | 93.99  | n.a.     |

For comparison of Chinese and English of the HPLC data table.

| 序号    | 峰名称       | 保留时间 (min)           | 峰面积 (mAU*min)       | 峰高 (mAU)          | 相对峰面积 (%)              | 相对峰高 (%)                 | 样品量 n.a.           |
|-------|-----------|----------------------|---------------------|-------------------|------------------------|--------------------------|--------------------|
| Entry | Peak name | Retention time (min) | Peak area (mAU*min) | Peak height (mAU) | Relative peak area (%) | Relative Peak height (%) | Sample volume n.a. |

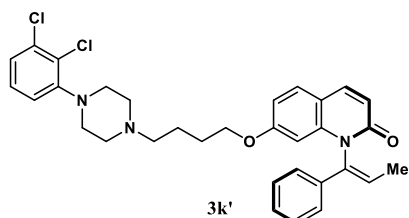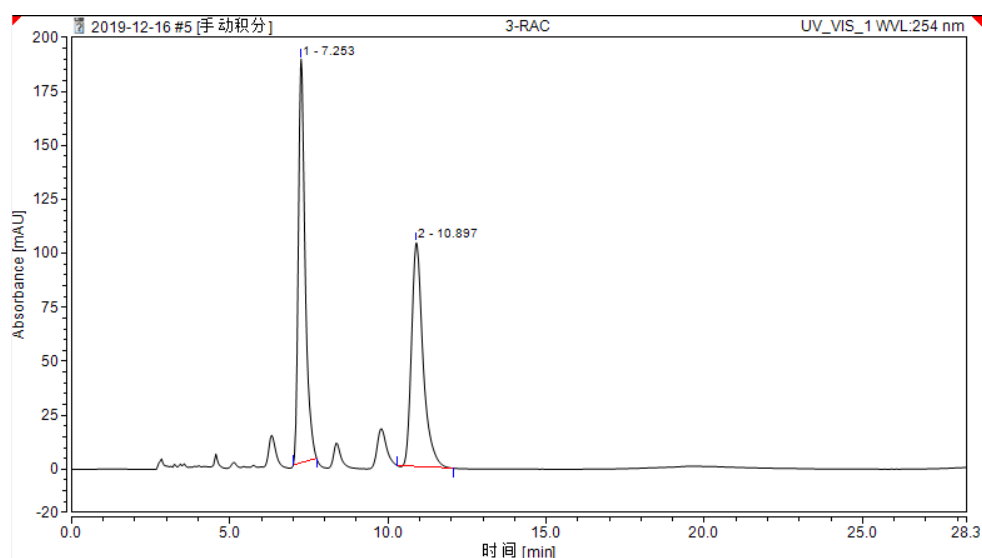

积分结果

| 序号 | 峰名称 | 保留时间 min | 峰面积 mAU*min | 峰高 mAU  | 相对峰面积 % | 相对峰高 % | 样品量 n.a. |
|----|-----|----------|-------------|---------|---------|--------|----------|
| 1  |     | 7.253    | 46.501      | 186.992 | 51.49   | 64.33  | n.a.     |
| 2  |     | 10.897   | 43.810      | 103.671 | 48.51   | 35.67  | n.a.     |

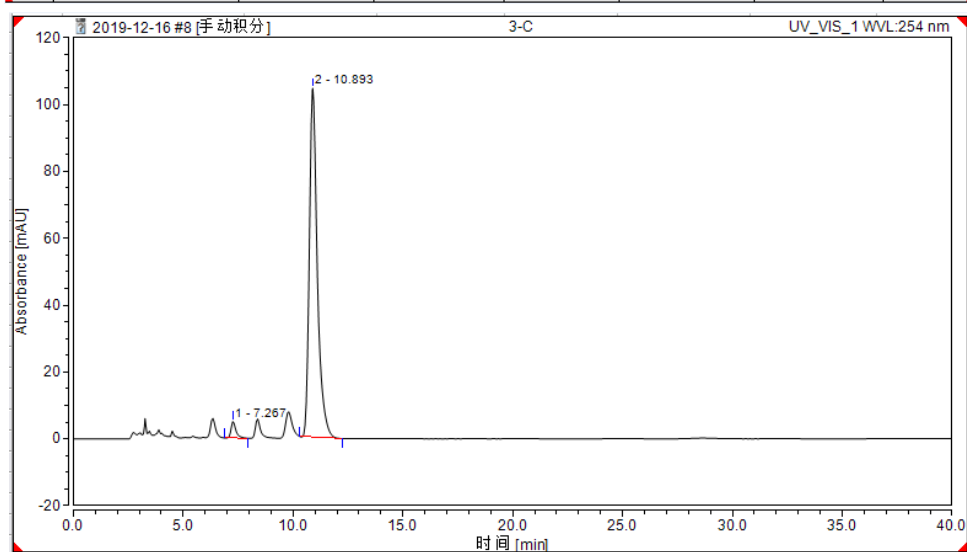

积分结果

| 序号 | 峰名称 | 保留时间 min | 峰面积 mAU*min | 峰高 mAU  | 相对峰面积 % | 相对峰高 % | 样品量 n.a. |
|----|-----|----------|-------------|---------|---------|--------|----------|
| 1  |     | 7.267    | 1.285       | 5.018   | 2.85    | 4.59   | n.a.     |
| 2  |     | 10.893   | 43.782      | 104.336 | 97.15   | 95.41  | n.a.     |

For comparison of Chinese and English of the HPLC data table.

| 序号    | 峰名称       | 保留时间 (min)           | 峰面积 (mAU*min)       | 峰高 (mAU)          | 相对峰面积 (%)              | 相对峰高 (%)                 | 样品量 n.a.           |
|-------|-----------|----------------------|---------------------|-------------------|------------------------|--------------------------|--------------------|
| Entry | Peak name | Retention time (min) | Peak area (mAU*min) | Peak height (mAU) | Relative peak area (%) | Relative Peak height (%) | Sample volume n.a. |

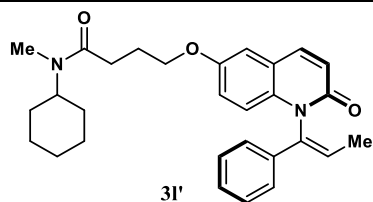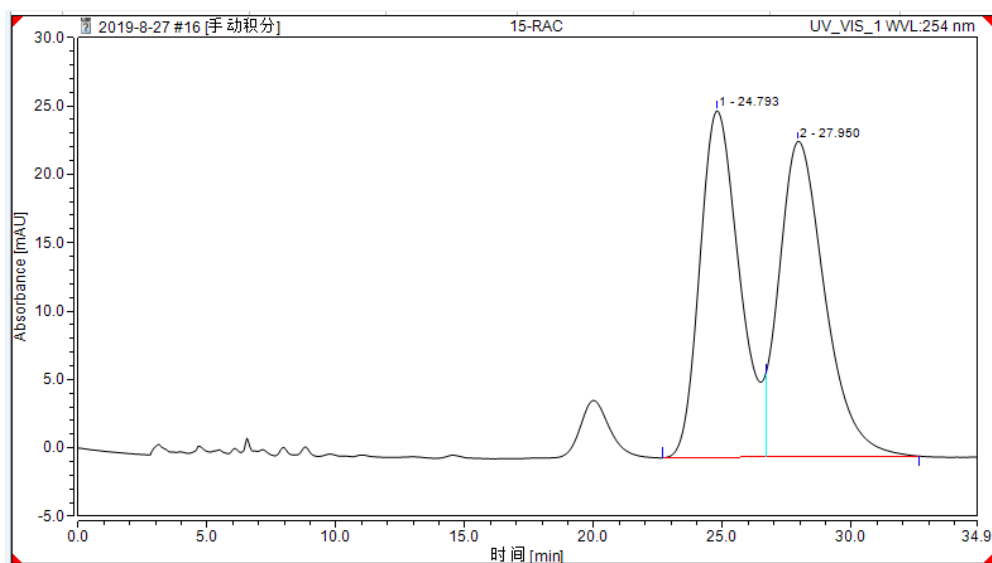

| 积分结果 |     |          |             |        |         |        |          |
|------|-----|----------|-------------|--------|---------|--------|----------|
| 序号   | 峰名称 | 保留时间 min | 峰面积 mAU*min | 峰高 mAU | 相对峰面积 % | 相对峰高 % | 样品量 n.a. |
| 1    |     | 24.793   | 45.214      | 25.347 | 48.89   | 52.34  | n.a.     |
| 2    |     | 27.950   | 47.276      | 23.078 | 51.11   | 47.66  | n.a.     |

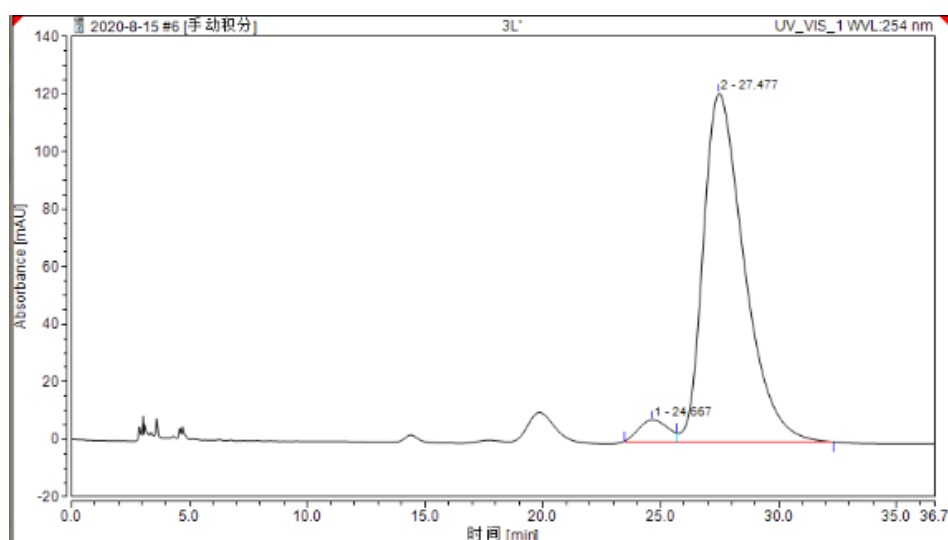

| 积分结果 |     |          |             |         |         |        |          |
|------|-----|----------|-------------|---------|---------|--------|----------|
| 序号   | 峰名称 | 保留时间 min | 峰面积 mAU*min | 峰高 mAU  | 相对峰面积 % | 相对峰高 % | 样品量 n.a. |
| 1    |     | 24.667   | 10.516      | 7.442   | 4.15    | 5.79   | n.a.     |
| 2    |     | 27.477   | 243.105     | 121.019 | 95.85   | 94.21  | n.a.     |

For comparison of Chinese and English of the HPLC data table.

| 序号    | 峰名<br>称      | 保留时间<br>(min)           | 峰面积<br>(mAU*min)       | 峰高<br>(mAU)             | 相对峰面<br>积 (%)                | 相对峰高<br>(%)                    | 样品量<br>n.a.              |
|-------|--------------|-------------------------|------------------------|-------------------------|------------------------------|--------------------------------|--------------------------|
| Entry | Peak<br>name | Retention<br>time (min) | Peak area<br>(mAU*min) | Peak<br>height<br>(mAU) | Relative<br>peak area<br>(%) | Relative<br>Peak height<br>(%) | Sample<br>volume<br>n.a. |

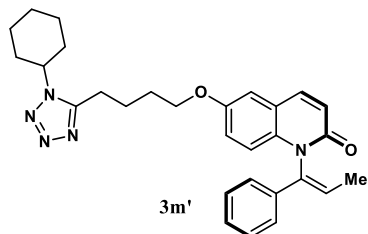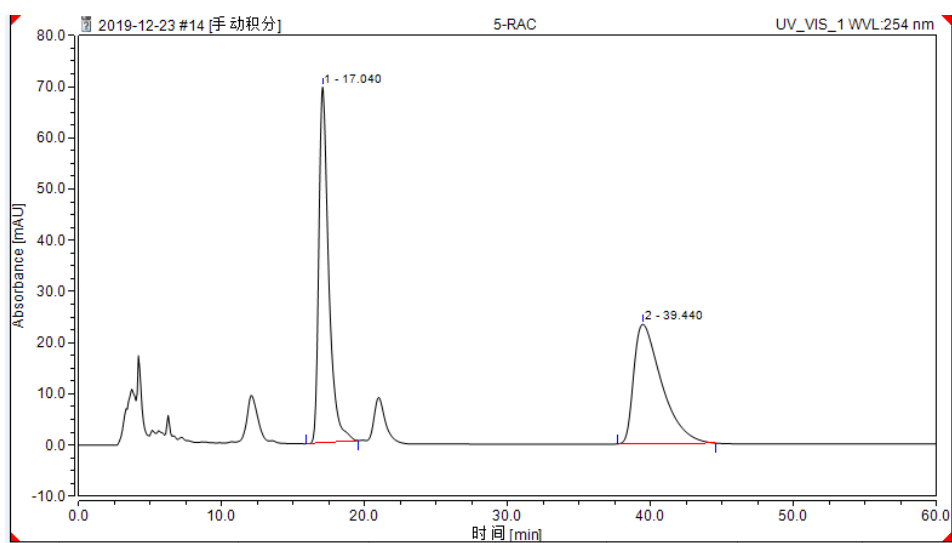

| 积分结果 |     |             |                |           |            |           |             |
|------|-----|-------------|----------------|-----------|------------|-----------|-------------|
| 序号   | 峰名称 | 保留时间<br>min | 峰面积<br>mAU*min | 峰高<br>mAU | 相对峰面积<br>% | 相对峰高<br>% | 样品量<br>n.a. |
| 1    |     | 17.040      | 55.732         | 69.483    | 51.38      | 74.86     | n.a.        |
| 2    |     | 39.440      | 52.731         | 23.332    | 48.62      | 25.14     | n.a.        |

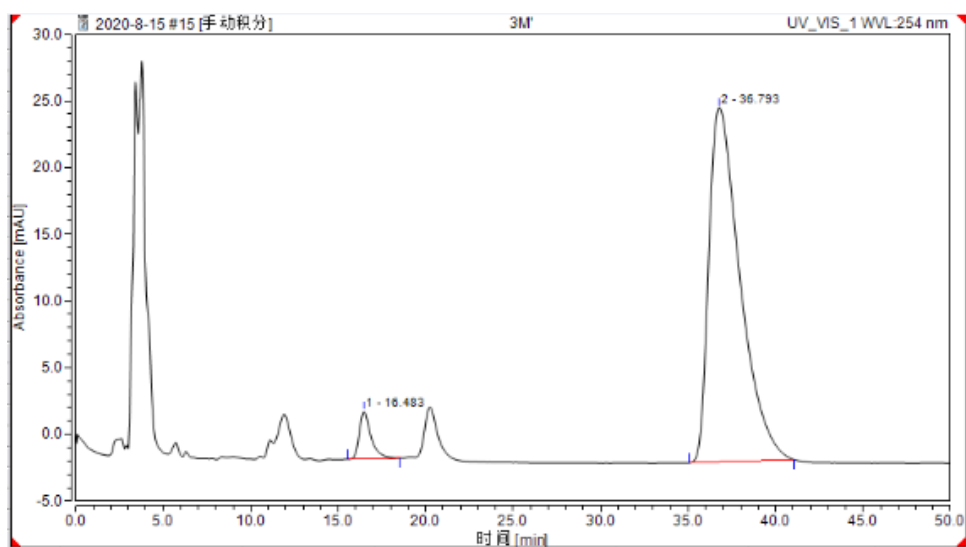

| 积分结果 |     |             |                |           |            |           |             |
|------|-----|-------------|----------------|-----------|------------|-----------|-------------|
| 序号   | 峰名称 | 保留时间<br>min | 峰面积<br>mAU*min | 峰高<br>mAU | 相对峰面积<br>% | 相对峰高<br>% | 样品量<br>n.a. |
| 1    |     | 16.483      | 2.748          | 3.547     | 4.77       | 11.77     | n.a.        |
| 2    |     | 36.793      | 54.855         | 26.573    | 95.23      | 88.23     | n.a.        |

For comparison of Chinese and English of the HPLC data table.

| 序号    | 峰名称       | 保留时间 (min)           | 峰面积 (mAU*min)       | 峰高 (mAU)          | 相对峰面积 (%)              | 相对峰高 (%)                 | 样品量 n.a.           |
|-------|-----------|----------------------|---------------------|-------------------|------------------------|--------------------------|--------------------|
| Entry | Peak name | Retention time (min) | Peak area (mAU*min) | Peak height (mAU) | Relative peak area (%) | Relative Peak height (%) | Sample volume n.a. |

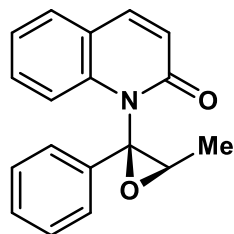

8a

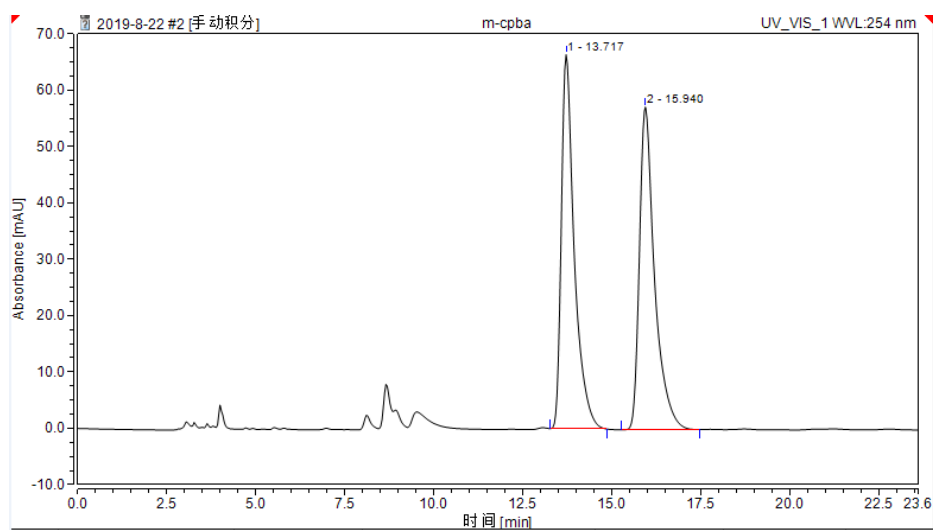

积分结果

| 序号 | 峰名称 | 保留时间 min | 峰面积 mAU*min | 峰高 mAU | 相对峰面积 % | 相对峰高 % | 样品量 n.a. |
|----|-----|----------|-------------|--------|---------|--------|----------|
| 1  |     | 13.717   | 27.923      | 66.411 | 49.77   | 53.70  | n.a.     |
| 2  |     | 15.940   | 28.182      | 57.266 | 50.23   | 46.30  | n.a.     |

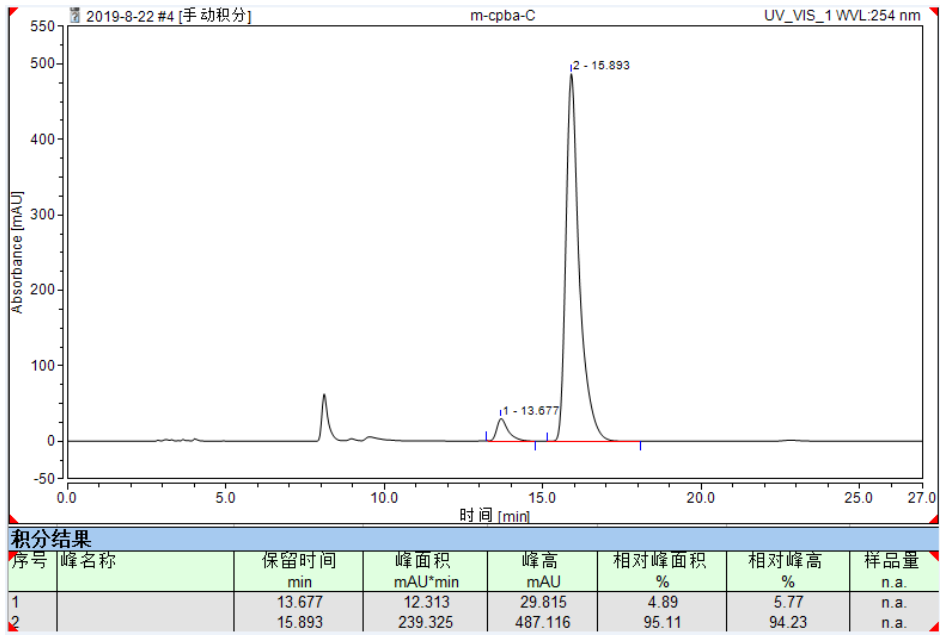

For comparison of Chinese and English of the HPLC data table.

| 序号    | 峰名称       | 保留时间<br>(min)        | 峰面积<br>(mAU*min)    | 峰高<br>(mAU)       | 相对峰面积<br>(%)           | 相对峰高<br>(%)              | 样品量<br>n.a.        |
|-------|-----------|----------------------|---------------------|-------------------|------------------------|--------------------------|--------------------|
| Entry | Peak name | Retention time (min) | Peak area (mAU*min) | Peak height (mAU) | Relative peak area (%) | Relative Peak height (%) | Sample volume n.a. |

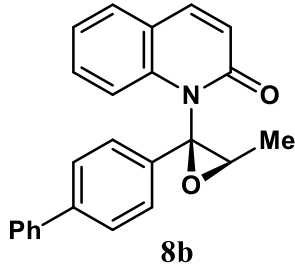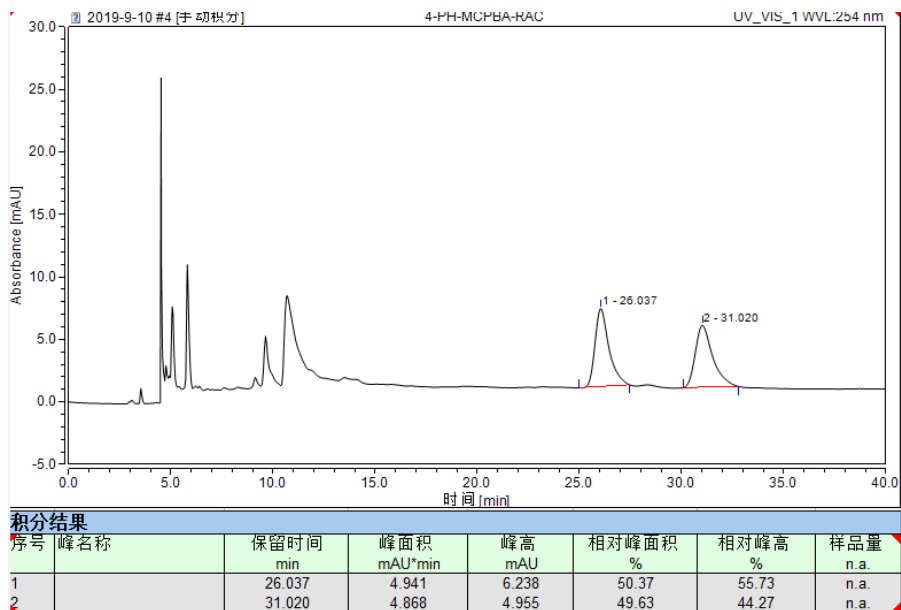



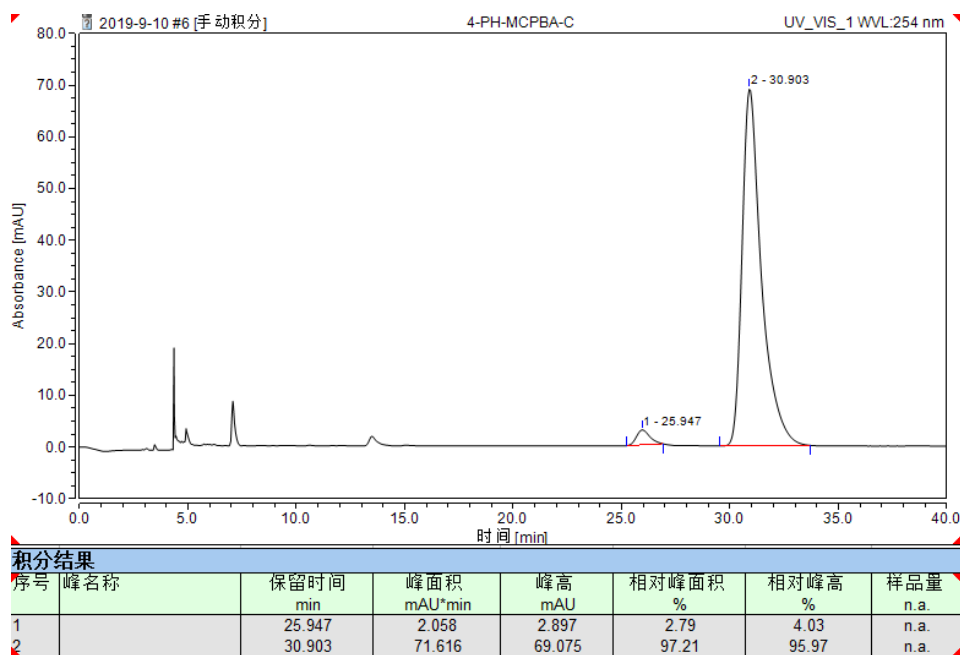

For comparison of Chinese and English of the HPLC data table.

| 序号    | 峰名称       | 保留时间<br>(min)        | 峰面积<br>(mAU*min)    | 峰高<br>(mAU)       | 相对峰面积<br>(%)           | 相对峰高<br>(%)              | 样品量<br>n.a.        |
|-------|-----------|----------------------|---------------------|-------------------|------------------------|--------------------------|--------------------|
| Entry | Peak name | Retention time (min) | Peak area (mAU*min) | Peak height (mAU) | Relative peak area (%) | Relative Peak height (%) | Sample volume n.a. |
|       |           |                      |                     |                   |                        |                          |                    |

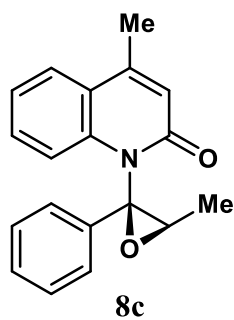

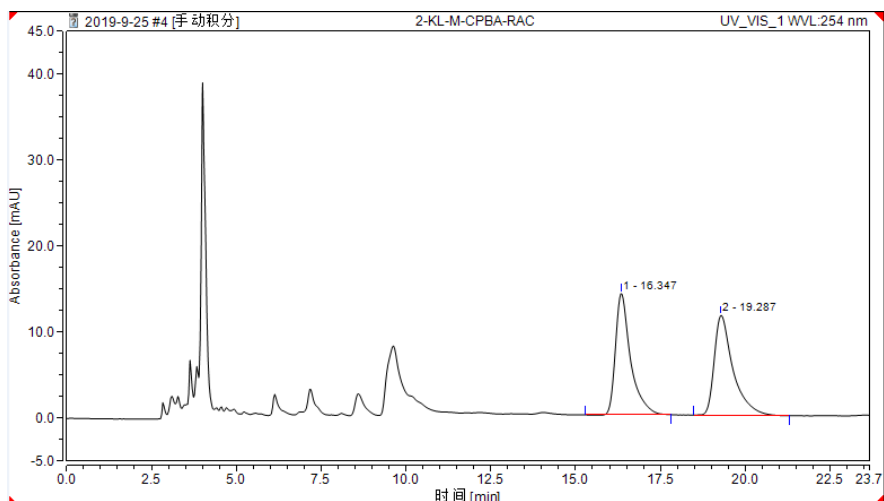

| 积分结果 |     |             |                |           |            |           |             |
|------|-----|-------------|----------------|-----------|------------|-----------|-------------|
| 序号   | 峰名称 | 保留时间<br>min | 峰面积<br>mAU*min | 峰高<br>mAU | 相对峰面积<br>% | 相对峰高<br>% | 样品量<br>n.a. |
| 1    |     | 16.347      | 7.268          | 14.130    | 49.47      | 54.88     | n.a.        |
| 2    |     | 19.287      | 7.423          | 11.617    | 50.53      | 45.12     | n.a.        |

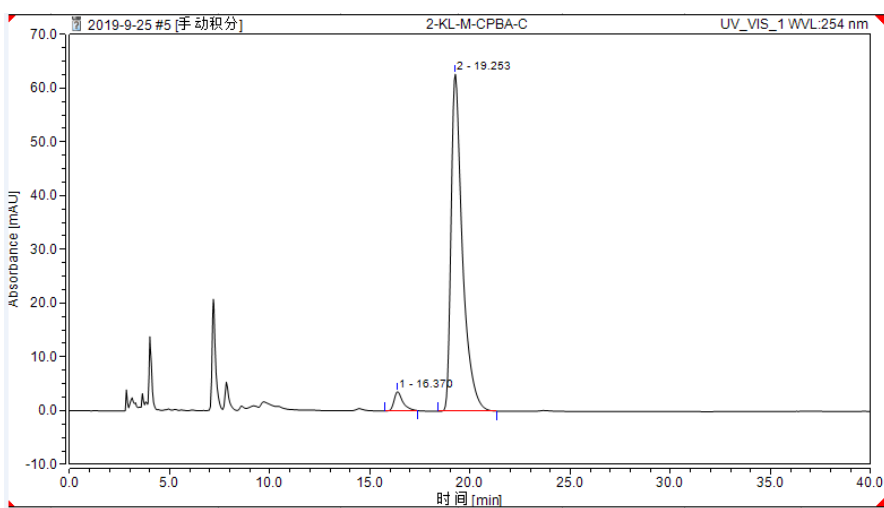

| 积分结果 |     |             |                |           |            |           |             |
|------|-----|-------------|----------------|-----------|------------|-----------|-------------|
| 序号   | 峰名称 | 保留时间<br>min | 峰面积<br>mAU*min | 峰高<br>mAU | 相对峰面积<br>% | 相对峰高<br>% | 样品量<br>n.a. |
| 1    |     | 16.370      | 1.815          | 3.585     | 4.22       | 5.41      | n.a.        |
| 2    |     | 19.253      | 41.167         | 62.703    | 95.78      | 94.59     | n.a.        |

For comparison of Chinese and English of the HPLC data table.

| 序号    | 峰名称       | 保留时间<br>(min)        | 峰面积<br>(mAU*min)    | 峰高<br>(mAU)       | 相对峰面积<br>(%)           | 相对峰高<br>(%)              | 样品量<br>n.a.        |
|-------|-----------|----------------------|---------------------|-------------------|------------------------|--------------------------|--------------------|
| Entry | Peak name | Retention time (min) | Peak area (mAU*min) | Peak height (mAU) | Relative peak area (%) | Relative Peak height (%) | Sample volume n.a. |
|       |           |                      |                     |                   |                        |                          |                    |

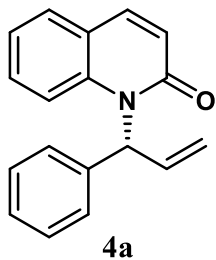

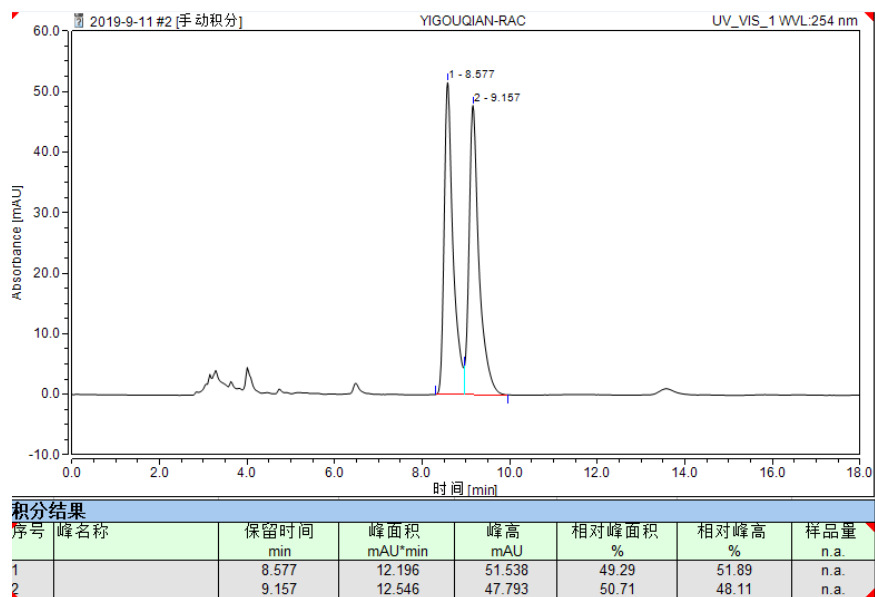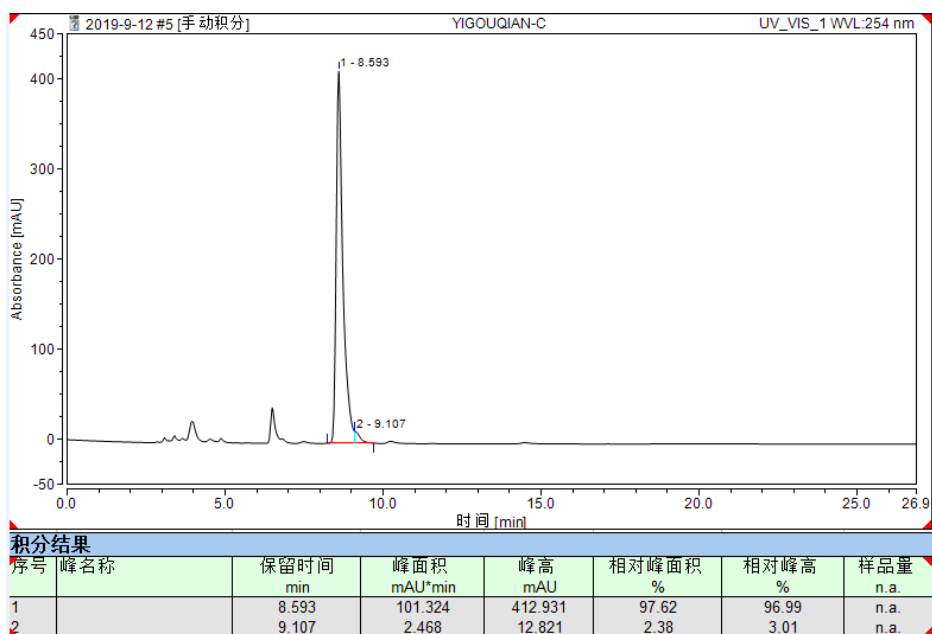

For comparison of Chinese and English of the HPLC data table.

| 序号    | 峰名<br>称      | 保留时间<br>(min)           | 峰面<br>积<br>(mAU*min)   | 峰高<br>(mAU)             | 相对峰面<br>积 (%)                | 相对峰高<br>(%)                    | 样品量<br>n.a.              |
|-------|--------------|-------------------------|------------------------|-------------------------|------------------------------|--------------------------------|--------------------------|
| Entry | Peak<br>name | Retention<br>time (min) | Peak area<br>(mAU*min) | Peak<br>height<br>(mAU) | Relative<br>peak area<br>(%) | Relative<br>Peak height<br>(%) | Sample<br>volume<br>n.a. |

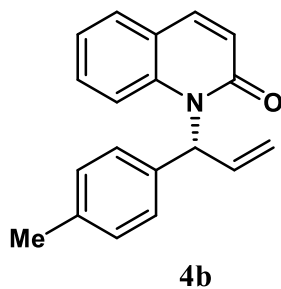

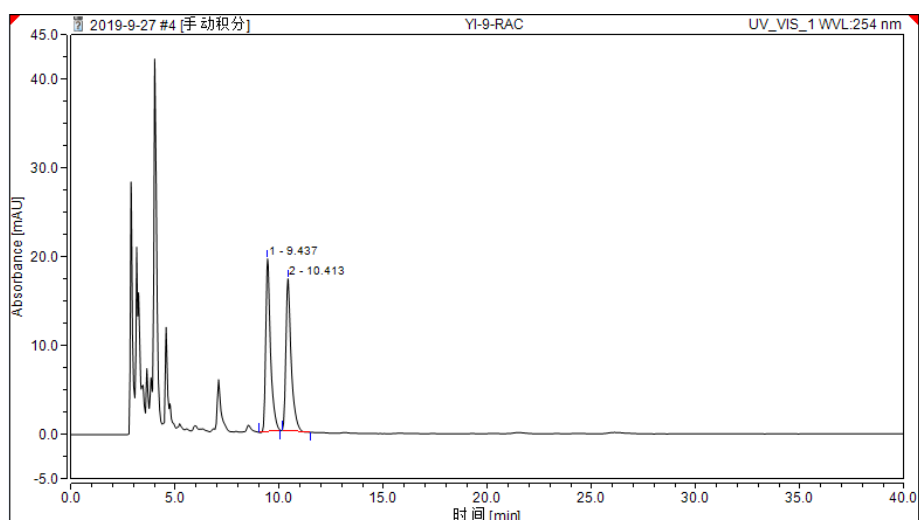

| 积分结果 |     |             |                |           |            |           |             |
|------|-----|-------------|----------------|-----------|------------|-----------|-------------|
| 序号   | 峰名称 | 保留时间<br>min | 峰面积<br>mAU*min | 峰高<br>mAU | 相对峰面积<br>% | 相对峰高<br>% | 样品量<br>n.a. |
| 1    |     | 9.437       | 5.128          | 19.439    | 50.60      | 53.22     | n.a.        |
| 2    |     | 10.413      | 5.006          | 17.084    | 49.40      | 46.78     | n.a.        |

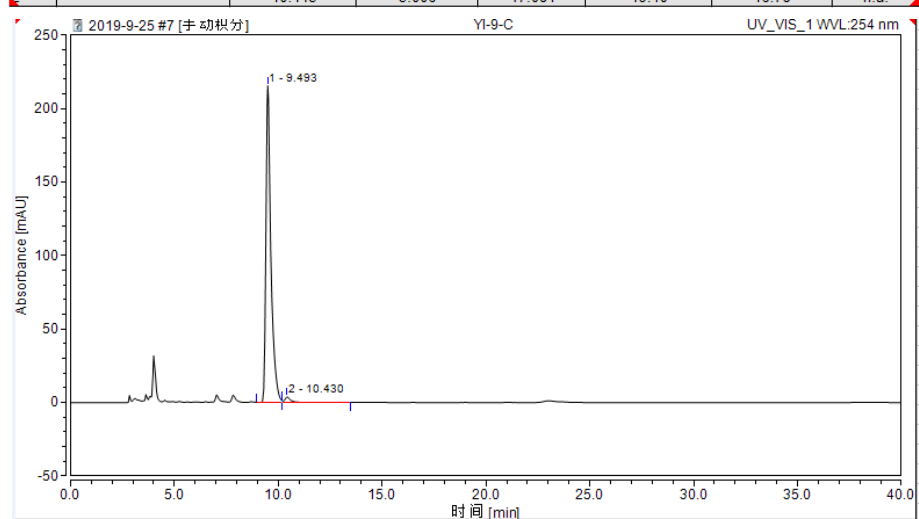

| 积分结果 |     |             |                |           |            |           |             |
|------|-----|-------------|----------------|-----------|------------|-----------|-------------|
| 序号   | 峰名称 | 保留时间<br>min | 峰面积<br>mAU*min | 峰高<br>mAU | 相对峰面积<br>% | 相对峰高<br>% | 样品量<br>n.a. |
| 1    |     | 9.493       | 59.700         | 215.436   | 98.15      | 98.31     | n.a.        |
| 2    |     | 10.430      | 1.127          | 3.696     | 1.85       | 1.69      | n.a.        |

For comparison of Chinese and English of the HPLC data table.

| 序号    | 峰名称       | 保留时间<br>(min)        | 峰面积<br>(mAU*min)    | 峰高<br>(mAU)       | 相对峰面积<br>(%)           | 相对峰高<br>(%)              | 样品量<br>n.a.        |
|-------|-----------|----------------------|---------------------|-------------------|------------------------|--------------------------|--------------------|
| Entry | Peak name | Retention time (min) | Peak area (mAU*min) | Peak height (mAU) | Relative peak area (%) | Relative Peak height (%) | Sample volume n.a. |
|       |           |                      |                     |                   |                        |                          |                    |

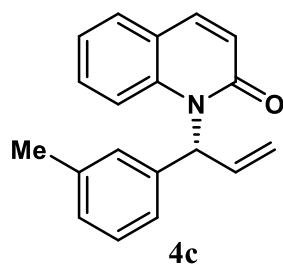

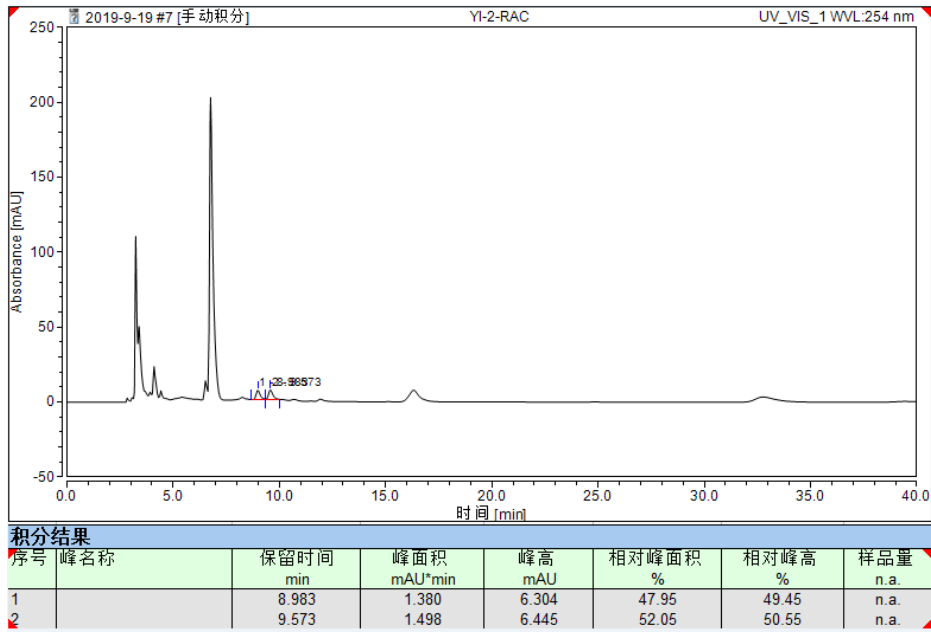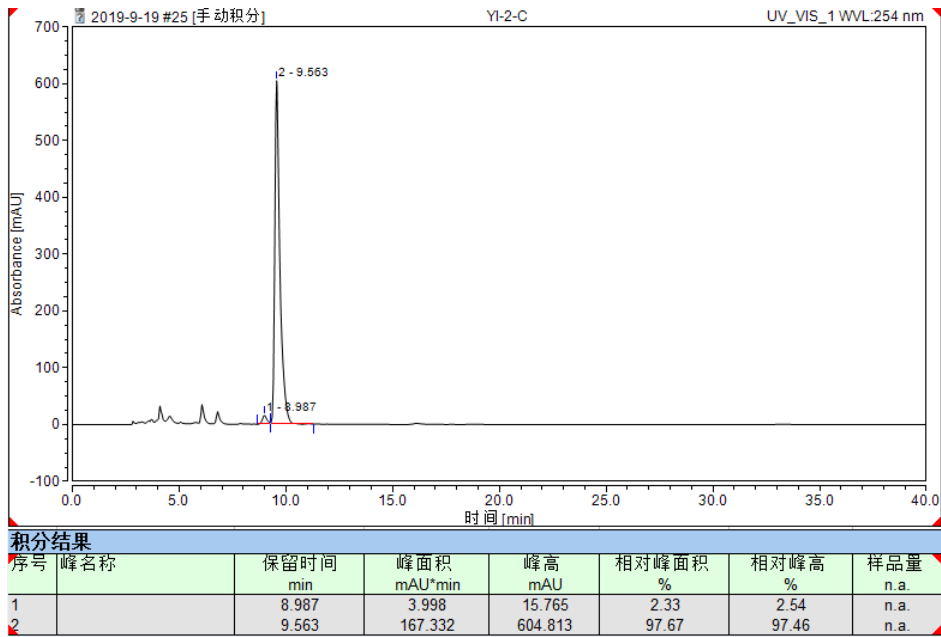

For comparison of Chinese and English of the HPLC data table.

| 序号    | 峰名<br>称      | 保留时间<br>(min)           | 峰面<br>积<br>(mAU*min)   | 峰高<br>(mAU)             | 相对峰面<br>积 (%)                | 相对峰高<br>(%)                    | 样品量<br>n.a.              |
|-------|--------------|-------------------------|------------------------|-------------------------|------------------------------|--------------------------------|--------------------------|
| Entry | Peak<br>name | Retention<br>time (min) | Peak area<br>(mAU*min) | Peak<br>height<br>(mAU) | Relative<br>peak area<br>(%) | Relative<br>Peak height<br>(%) | Sample<br>volume<br>n.a. |

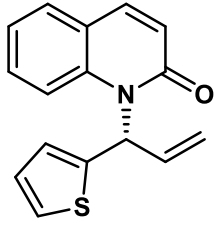

4d

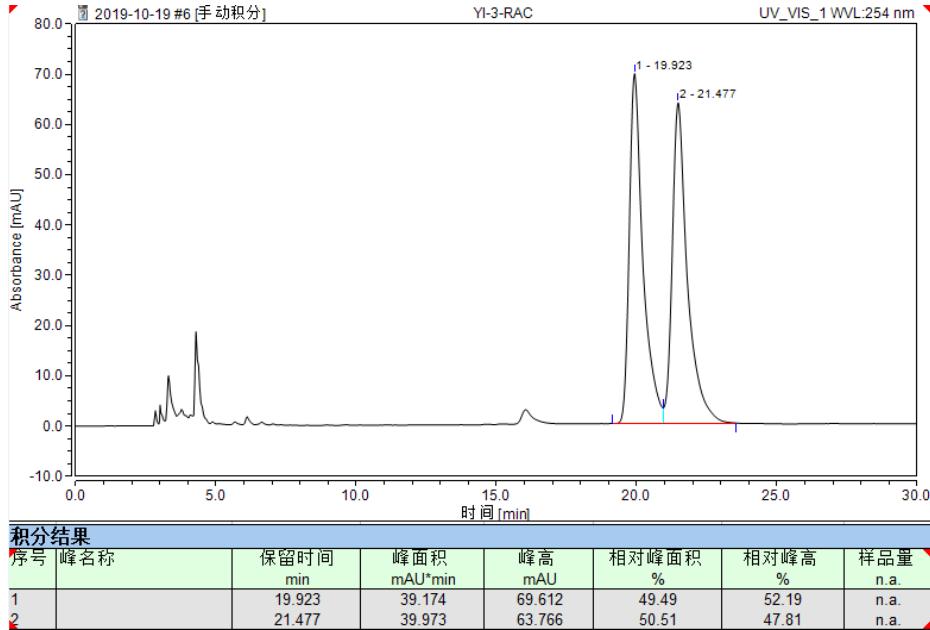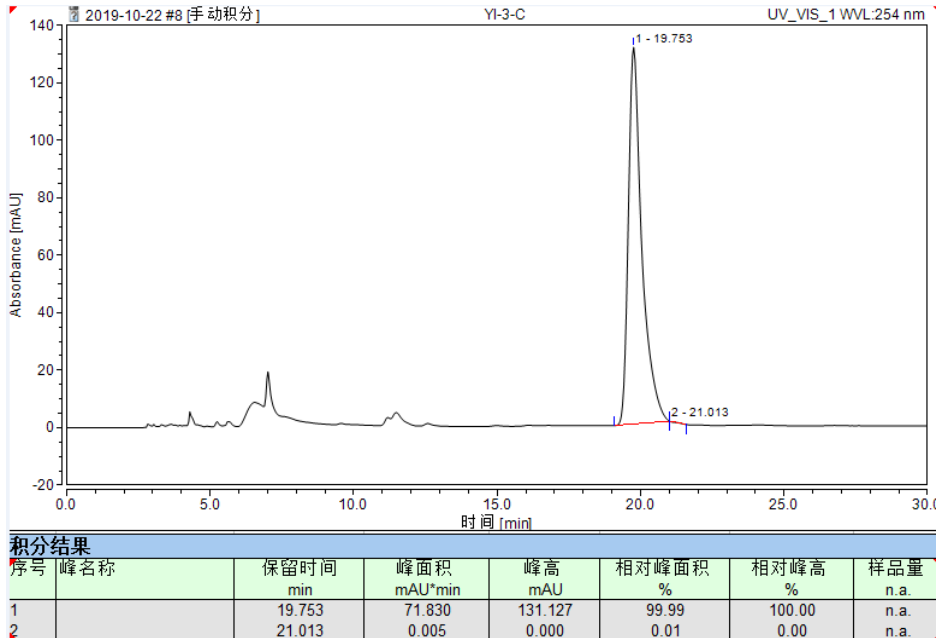

For comparison of Chinese and English of the HPLC data table.

| 序号    | 峰名称       | 保留时间<br>(min)        | 峰面积<br>(mAU*min)    | 峰高<br>(mAU) | 相对峰面积<br>(%)       | 相对峰高<br>(%)          | 样品量<br>n.a.   |
|-------|-----------|----------------------|---------------------|-------------|--------------------|----------------------|---------------|
| Entry | Peak name | Retention time (min) | Peak area (mAU*min) | Peak height | Relative peak area | Relative Peak height | Sample volume |

|  |  |  |  |       |     |     |      |
|--|--|--|--|-------|-----|-----|------|
|  |  |  |  | (mAU) | (%) | (%) | n.a. |
|--|--|--|--|-------|-----|-----|------|

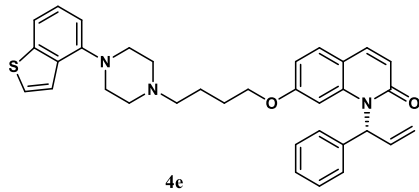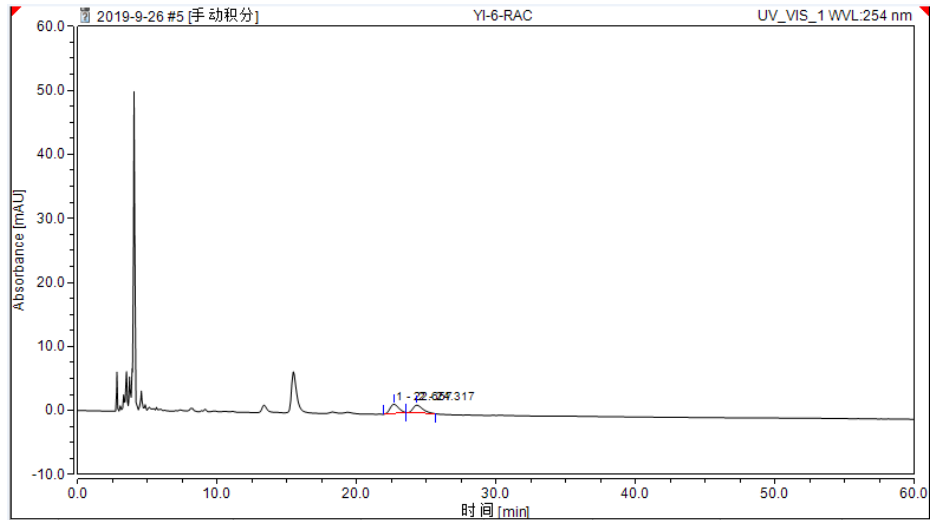

| 积分结果 |     |             |                |           |            |           |      |
|------|-----|-------------|----------------|-----------|------------|-----------|------|
| 序号   | 峰名称 | 保留时间<br>min | 峰面积<br>mAU*min | 峰高<br>mAU | 相对峰面积<br>% | 相对峰高<br>% | 样品量  |
| 1    |     | 22.657      | 1.039          | 1.443     | 50.46      | 53.81     | n.a. |
| 2    |     | 24.317      | 1.020          | 1.239     | 49.54      | 46.19     | n.a. |

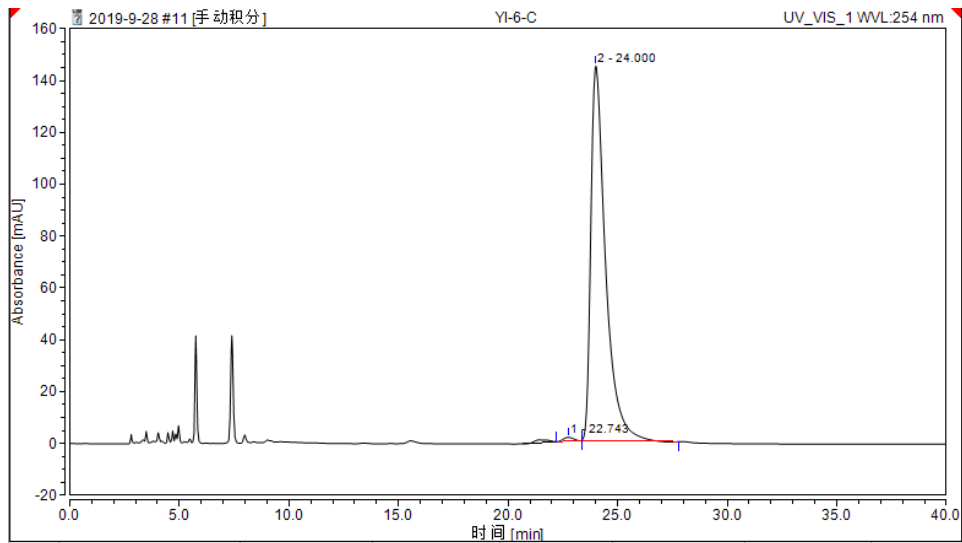

| 积分结果 |     |             |                |           |            |           |      |
|------|-----|-------------|----------------|-----------|------------|-----------|------|
| 序号   | 峰名称 | 保留时间<br>min | 峰面积<br>mAU*min | 峰高<br>mAU | 相对峰面积<br>% | 相对峰高<br>% | 样品量  |
| 1    |     | 22.743      | 0.773          | 1.496     | 0.68       | 1.02      | n.a. |
| 2    |     | 24.000      | 112.348        | 144.514   | 99.32      | 98.98     | n.a. |

For comparison of Chinese and English of the HPLC data table.

| 序号    | 峰名称       | 保留时间 (min)           | 峰面积 (mAU*min)       | 峰高 (mAU)          | 相对峰面积 (%)              | 相对峰高 (%)                 | 样品量 n.a.           |
|-------|-----------|----------------------|---------------------|-------------------|------------------------|--------------------------|--------------------|
| Entry | Peak name | Retention time (min) | Peak area (mAU*min) | Peak height (mAU) | Relative peak area (%) | Relative Peak height (%) | Sample volume n.a. |

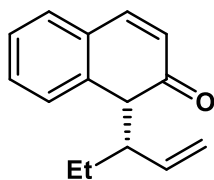

4f

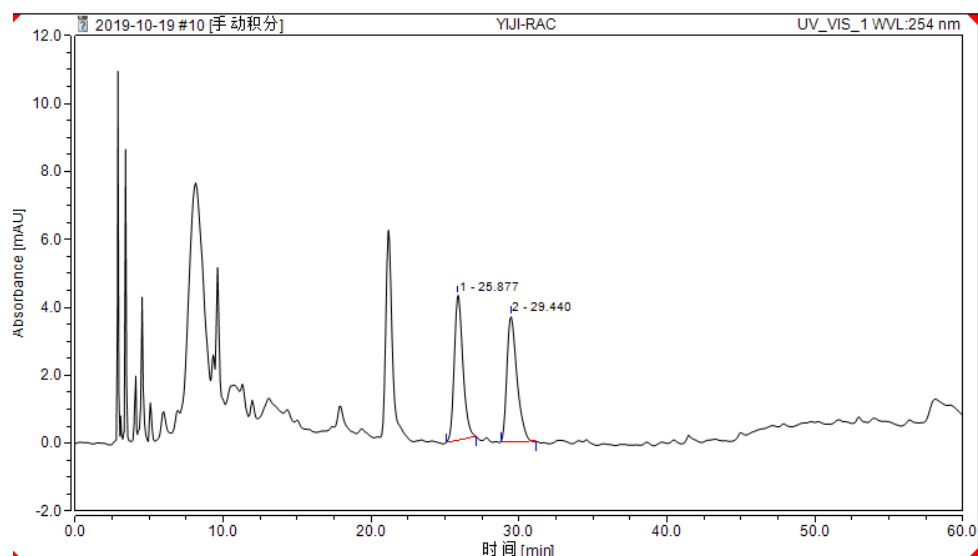

| 积分结果 |     |          |             |        |         |        |          |
|------|-----|----------|-------------|--------|---------|--------|----------|
| 序号   | 峰名称 | 保留时间 min | 峰面积 mAU*min | 峰高 mAU | 相对峰面积 % | 相对峰高 % | 样品量 n.a. |
| 1    |     | 25.877   | 2.901       | 4.270  | 49.91   | 53.61  | n.a.     |
| 2    |     | 29.440   | 2.912       | 3.696  | 50.09   | 46.39  | n.a.     |

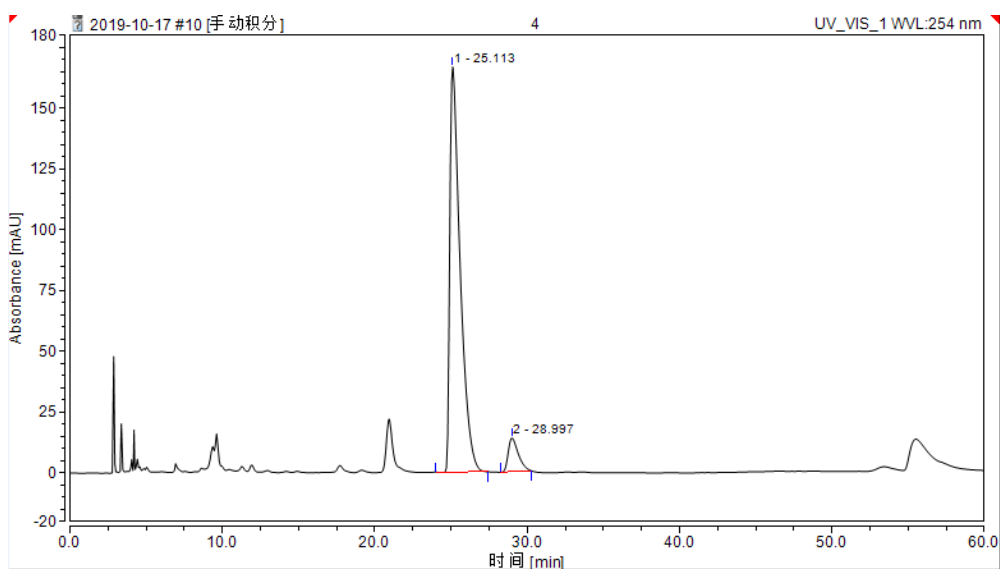

| 积分结果 |     |          |             |         |         |        |          |
|------|-----|----------|-------------|---------|---------|--------|----------|
| 序号   | 峰名称 | 保留时间 min | 峰面积 mAU*min | 峰高 mAU  | 相对峰面积 % | 相对峰高 % | 样品量 n.a. |
| 1    |     | 25.113   | 131.156     | 166.656 | 92.50   | 92.31  | n.a.     |
| 2    |     | 28.997   | 10.640      | 13.886  | 7.50    | 7.69   | n.a.     |
